# Supplementary material for: Signatures of mutation and selection in the cancer genome
Source: Springer Nature journal article supplement (doi:10.1038/nature08768), 2010-02-01
Supplement: 41586_2010_BFnature08768_MOESM262_ESM.pdf [file 41586_2010_BFnature08768_MOESM262_ESM.pdf]

## SUPPLEMENTARY INFORMATION

Supplementary material index.

|                                                                                                                             |    |
|-----------------------------------------------------------------------------------------------------------------------------|----|
| <b>Supplementary Figure 1:</b> Genomic breakpoint profile across the 746 cancer cell lines.                                 | 1  |
| <b>Supplementary Figure 2:</b> Genomic copy number heatmap for the 746 cancer cell lines.                                   | 2  |
| <b>Supplementary Figure 3:</b> Genomic profile for all hemizygous deletions across the 746 cancer cell lines.               | 3  |
| <b>Supplementary Figure 4.</b> Number of homozygous deletions in unexplained homozygous deletion clusters.                  | 4  |
| <b>Supplementary Table 1.</b> Samples used in the study.                                                                    |    |
| Cancer cell lines                                                                                                           | 5  |
| Normal samples                                                                                                              | 18 |
| <b>SupplementaryTable 2.</b> Tissue breakdown for different mutation classes for the whole genome and individual gene loci. | 26 |
| Whole Genome                                                                                                                | 27 |
| APC (KCG)                                                                                                                   | 28 |
| BHD (KCG)                                                                                                                   | 28 |
| BRAF (KCG)                                                                                                                  | 29 |
| BRCA1 (KCG)                                                                                                                 | 29 |
| BRCA2 (KCG)                                                                                                                 | 30 |
| CDH1 (KCG)                                                                                                                  | 30 |
| CDKN2A (KCG)                                                                                                                | 31 |
| CTNNB1 (KCG)                                                                                                                | 31 |
| CYLD (KCG)                                                                                                                  | 32 |
| EGFR (KCG)                                                                                                                  | 32 |
| ERBB2 (KCG)                                                                                                                 | 33 |
| FBXW7 (KCG)                                                                                                                 | 33 |
| FGFR3 (KCG)                                                                                                                 | 34 |
| FLT3 (KCG)                                                                                                                  | 34 |
| GNAS (KCG)                                                                                                                  | 35 |
| HRAS (KCG)                                                                                                                  | 35 |
| JAK2 (KCG)                                                                                                                  | 36 |
| KIT (KCG)                                                                                                                   | 36 |
| KRAS (KCG)                                                                                                                  | 37 |
| MAP2K4 (KCG)                                                                                                                | 37 |
| MLH1 (KCG)                                                                                                                  | 38 |
| MSH2 (KCG)                                                                                                                  | 38 |
| MSH6 (KCG)                                                                                                                  | 39 |
| MYC (KCG)                                                                                                                   | 39 |
| NF1 (KCG)                                                                                                                   | 40 |
| NF2 (KCG)                                                                                                                   | 40 |
| NOTCH (KCG)                                                                                                                 | 41 |
| NPM1 (KCG)                                                                                                                  | 41 |
| NRAS (KCG)                                                                                                                  | 42 |
| NTRK3 (KCG)                                                                                                                 | 42 |
| PALB2 (KCG)                                                                                                                 | 43 |
| PDGFRA (KCG)                                                                                                                | 43 |
| PHOX2B (KCG)                                                                                                                | 44 |
| PIK3CA (KCG)                                                                                                                | 44 |
| PTCH (KCG)                                                                                                                  | 45 |
| PTEN                                                                                                                        | 45 |
| RB1 (KCG)                                                                                                                   | 46 |
| RUNX1 (KCG)                                                                                                                 | 46 |
| SMAD4 (KCG)                                                                                                                 | 47 |
| SMO (KCG)                                                                                                                   | 47 |
| SOCS1 (KCG)                                                                                                                 | 48 |

|                                                                                                                                                           |     |
|-----------------------------------------------------------------------------------------------------------------------------------------------------------|-----|
| STK11 (KCG)                                                                                                                                               | 48  |
| SUFU (KCG)                                                                                                                                                | 49  |
| TP53 (KCG)                                                                                                                                                | 49  |
| VHL (KCG)                                                                                                                                                 | 50  |
| MACROD2 (Unknown)                                                                                                                                         | 51  |
| NEGR1 (Unknown)                                                                                                                                           | 51  |
| CNTNAP2 (FRA)                                                                                                                                             | 52  |
| CTNNA3 (FRA)                                                                                                                                              | 52  |
| DAB1 (FRA)                                                                                                                                                | 53  |
| DLG2 (FRA)                                                                                                                                                | 53  |
| DPYD (FRA)                                                                                                                                                | 54  |
| FHIT (FRA)                                                                                                                                                | 54  |
| GRID2 (FRA)                                                                                                                                               | 55  |
| IMMP2L (FRA)                                                                                                                                              | 55  |
| LARGE (FRA)                                                                                                                                               | 56  |
| LRP1B (FRA)                                                                                                                                               | 56  |
| NBEA (FRA)                                                                                                                                                | 57  |
| PARK2 (FRA)                                                                                                                                               | 57  |
| PDE4D (FRA)                                                                                                                                               | 58  |
| RORA (FRA)                                                                                                                                                | 58  |
| WWOX (FRA)                                                                                                                                                | 59  |
| <b>Supplementary Table 3.</b> Genes in amplicons.                                                                                                         | 60  |
| <b>Supplementary Table 4.</b> Putative oncogenic mutations in 46 known cancer genes.                                                                      | 77  |
| <b>Supplementary Table 5.</b> Zygosity patterns for the mutations within recessive cancer genes screened in this study.                                   | 79  |
| <b>Supplementary Table 6.</b> Deletion profiles for the CNP homozygous deletion clusters within the series of 466 control DNAs                            | 80  |
| <b>Supplementary Table 7.</b> Homozygous deletion clusters across the series of 746 cancer cell lines.                                                    | 85  |
| <b>Supplementary Table 8.</b> List of protein terminating variants associated with small hemizygous deletions                                             | 105 |
| <b>Supplementary Table 9.</b> Protein truncation mutations in <i>CTNNA1</i> , <i>CDKN2C</i> , <i>FHIT</i> , <i>WWOX</i> , <i>NEGR1</i> & <i>MACROD2</i> . | 106 |
| <b>Supplementary Table 10.</b> Mapping position for recessive cancer genes and fragile sites.                                                             |     |
| Recessive Cancer Genes                                                                                                                                    | 107 |
| Known Fragile Sites                                                                                                                                       | 108 |
| <b>Supplementary Table 11.</b> Primers and control amplimers used in multiplex PCR screen of RCGs.                                                        | 112 |

**Supplementary Figure 1: Genomic breakpoint profile across the 746 cancer cell lines.**

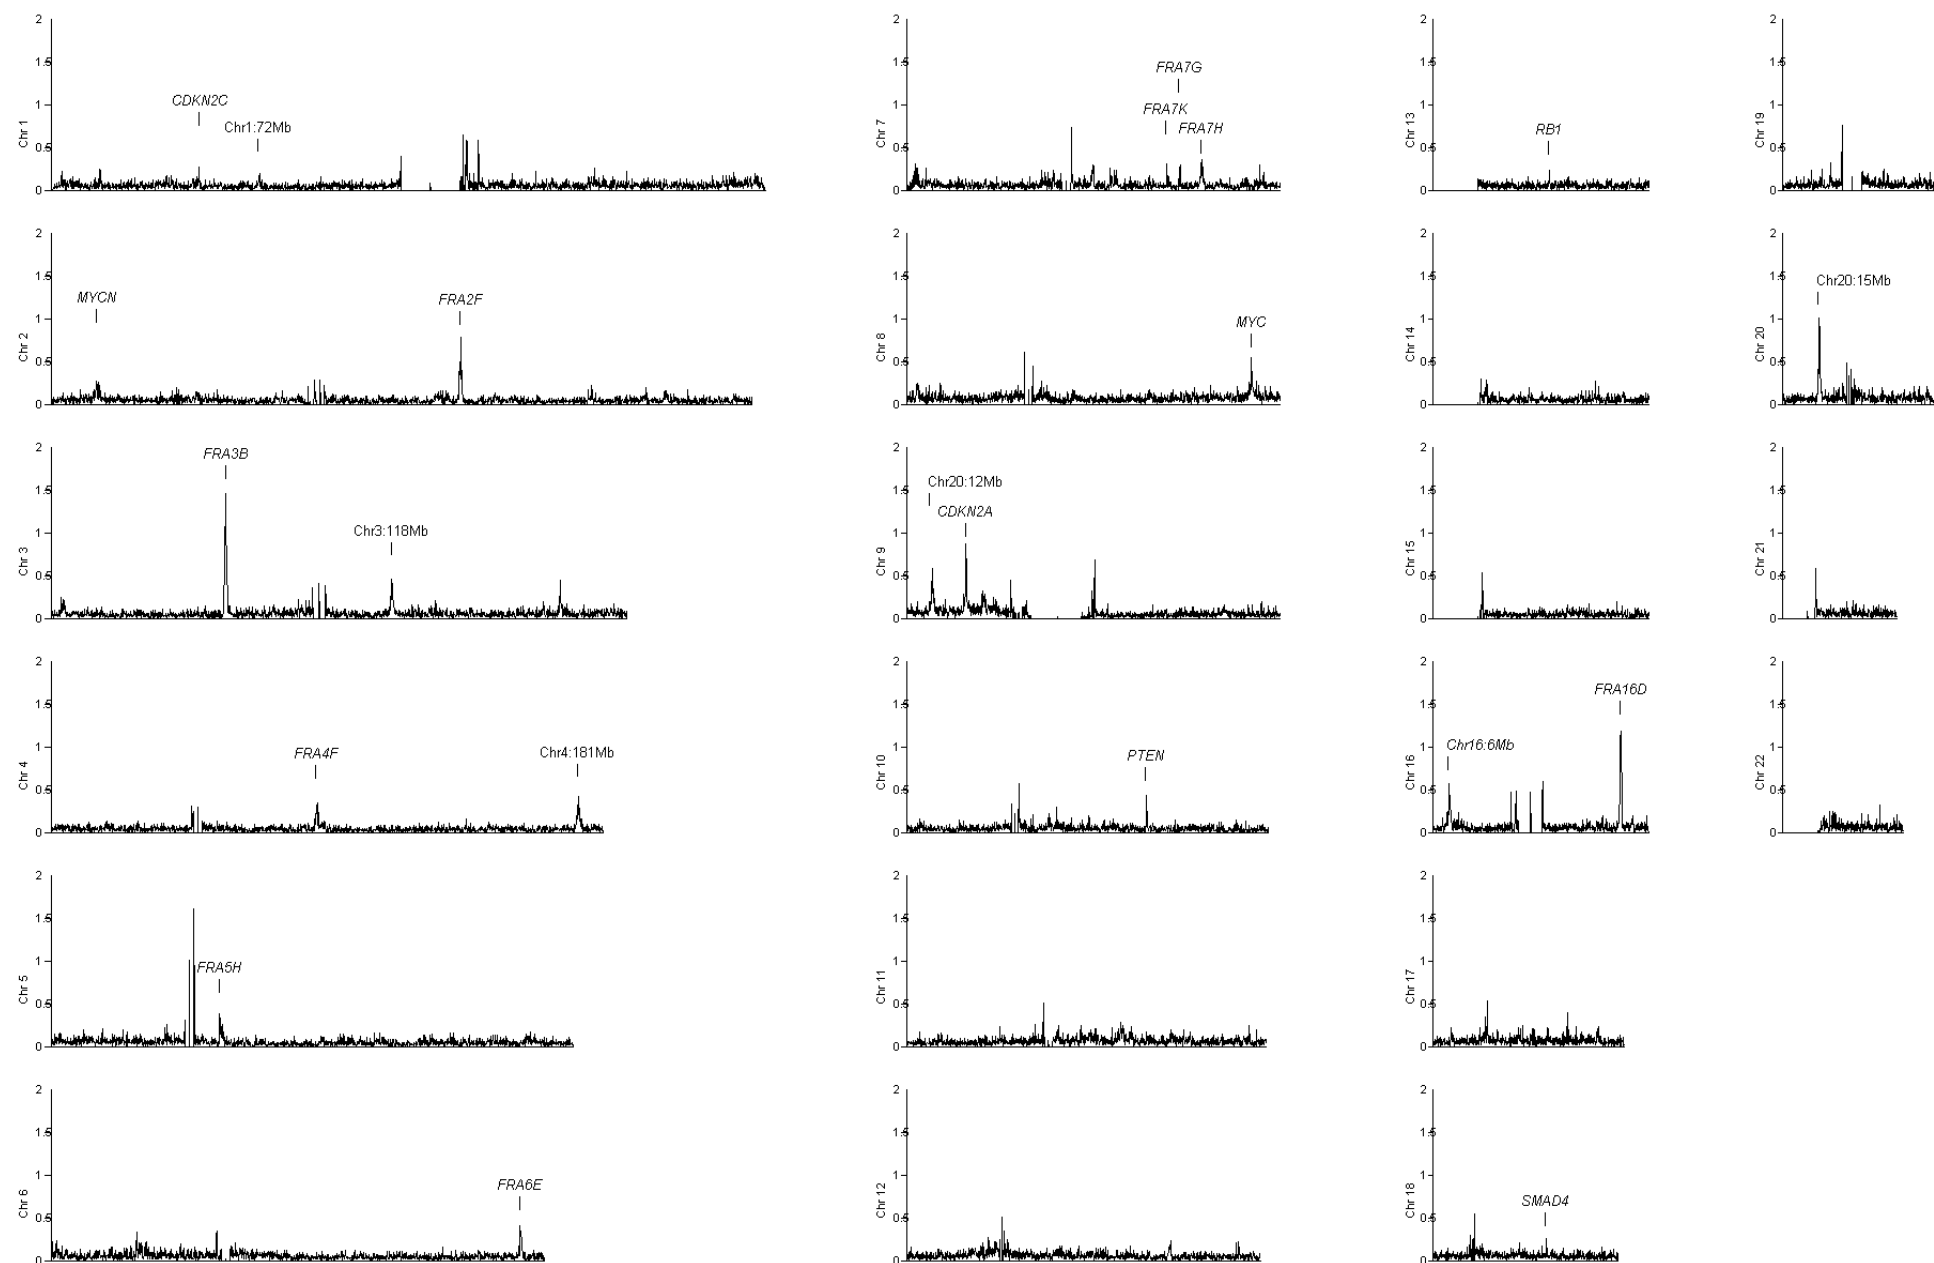

The distribution of breakpoints across the autosomal chromosomes is shown. The horizontal axis represents each chromosome (drawn to scale p to qter) and the vertical axis shows the average number of breaks per samples at each point. Loci showing prominent peaks and mentioned in the paper are annotated.

**Supplementary Figure 2:** Genomic copy number heatmap for the 746 cancer cell lines.

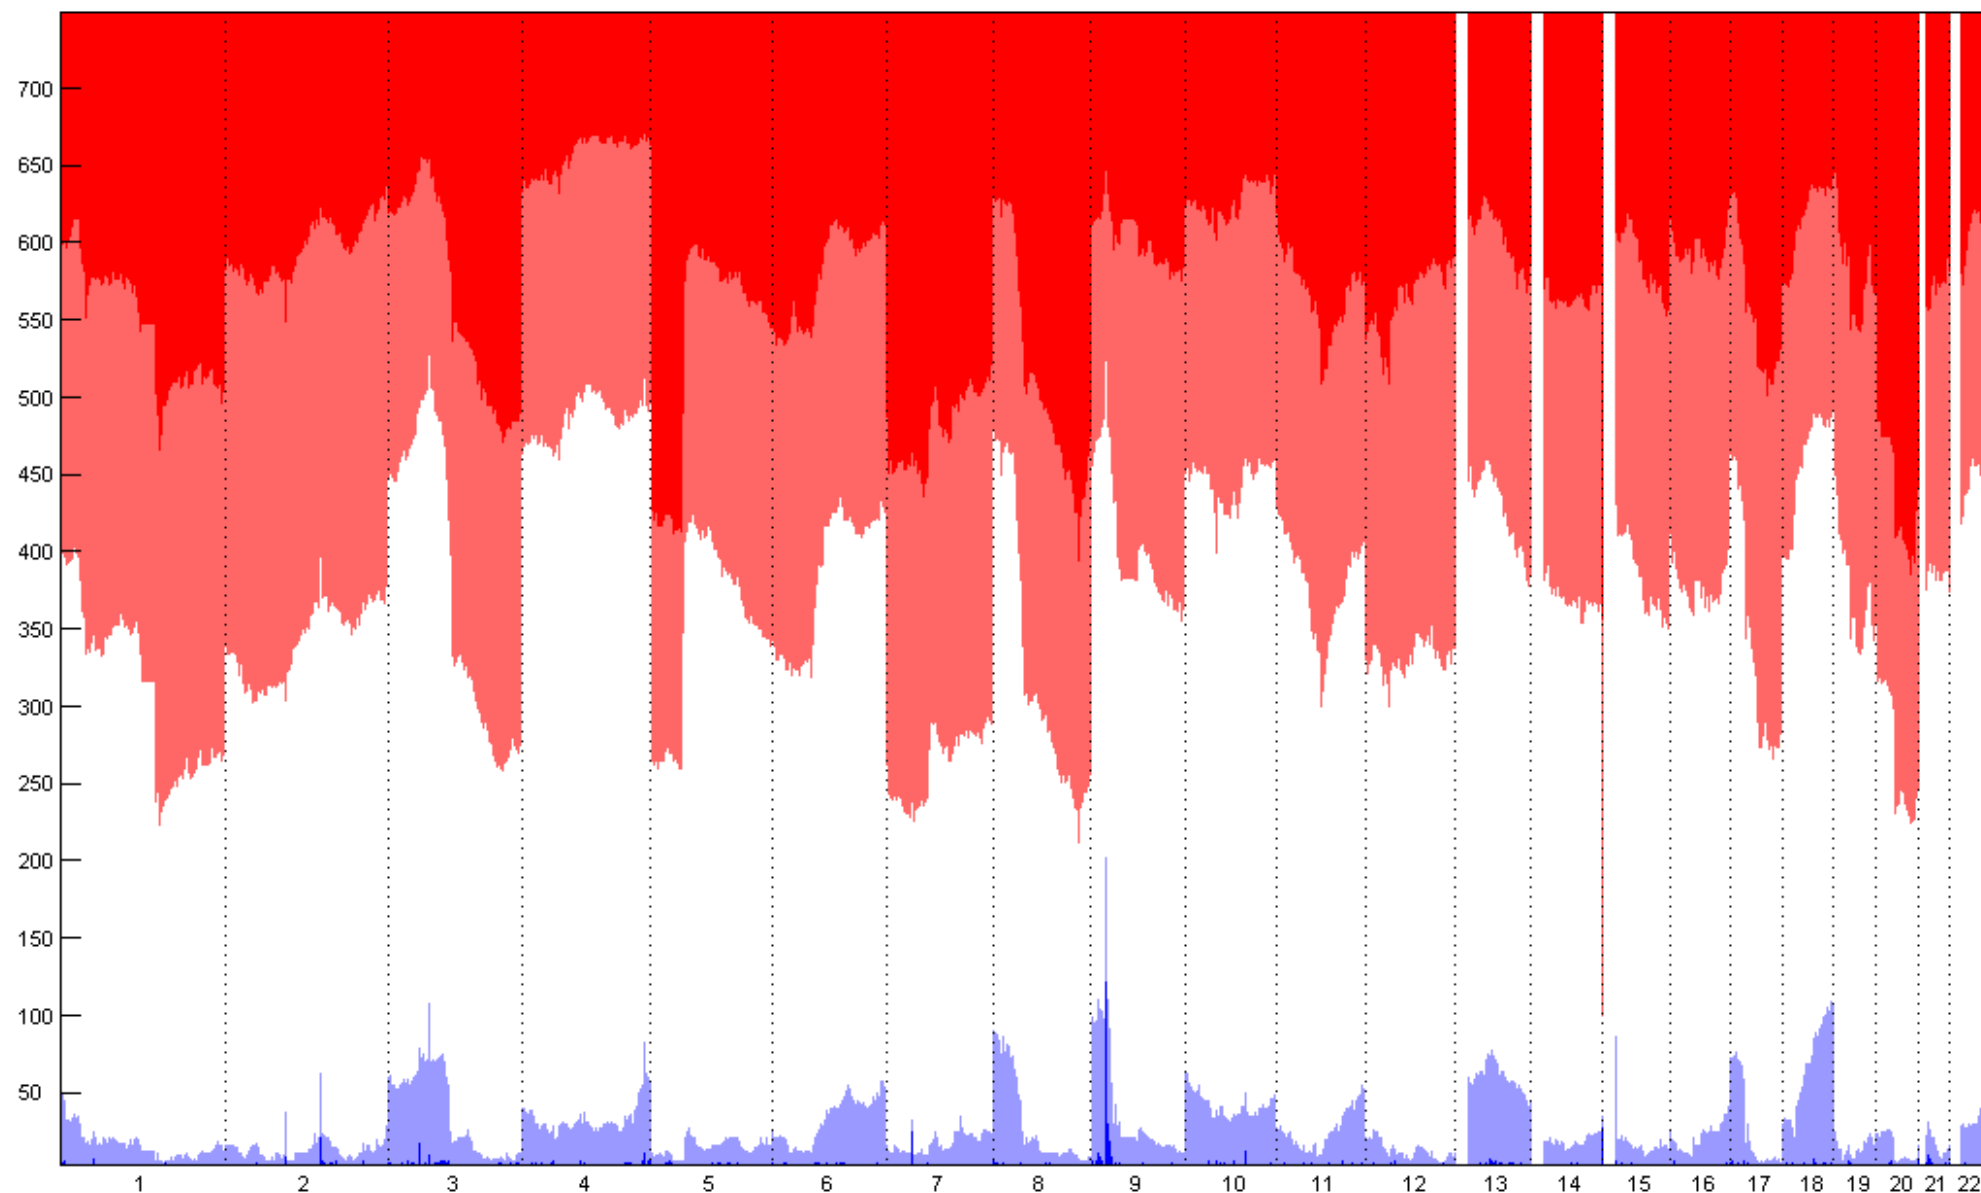

Copy number variation is highlighted for the 746 samples analysed. Copy number loss is coloured blue with homozygous deletions coloured dark blue and regions of with a copy number of 1 coloured light blue. Copy number gains are coloured red with regions of copy number 3 being light red and regions of copy number 4 or greater coloured dark red. The vertical axis represents sample count and the horizontal axis represents genomic location (labelled by chromosome).

**Supplementary Figure 3:** Genomic profile for all hemizygous deletions across the 746 cancer cell lines.

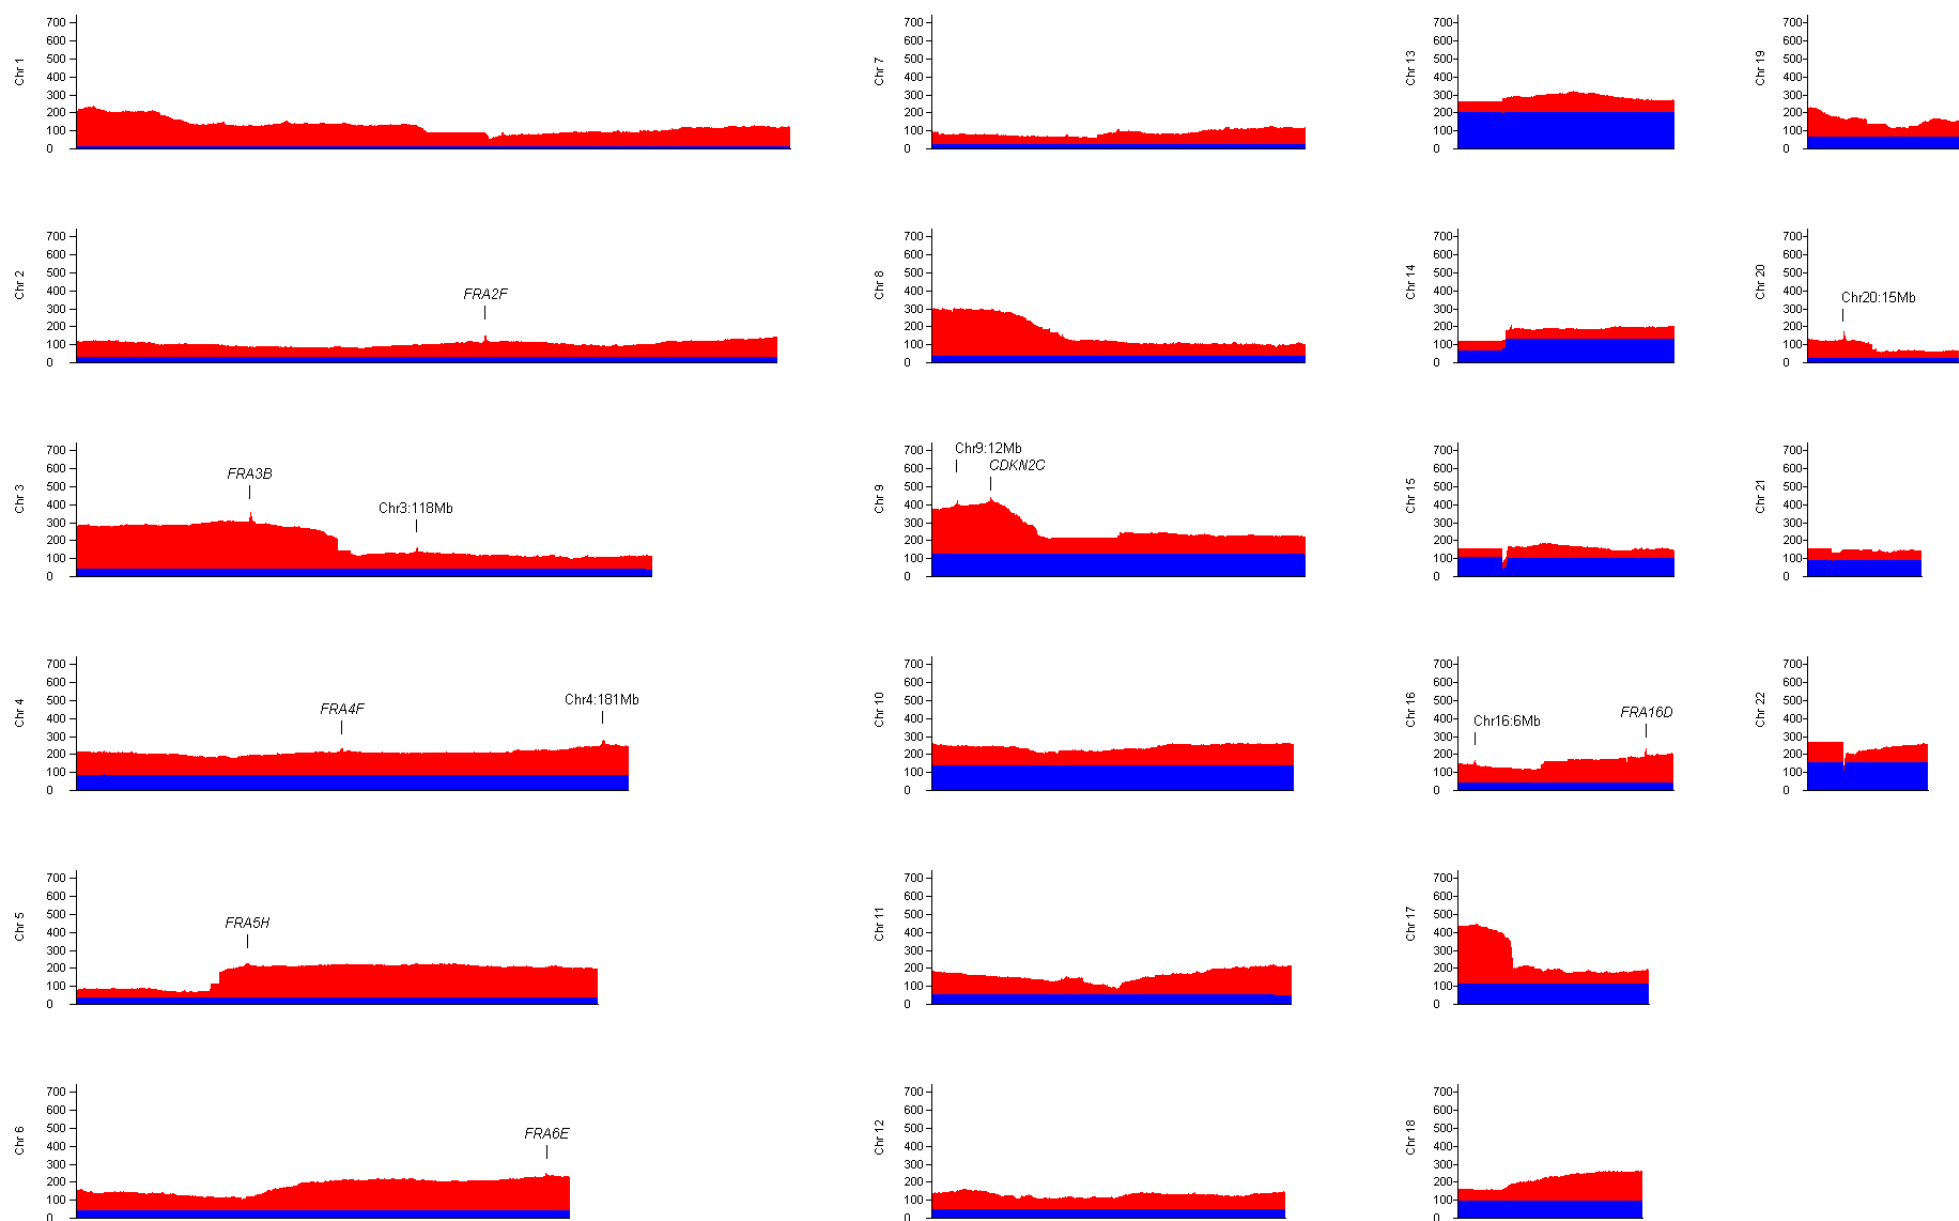

The distribution hemizygous deletions across the autosomal chromosomes is shown. Total chromosome loss is highlighted in blue. Small hemizygous deletions together with large hemizygous deletions and whole chromosome arm loss are shown in red. The horizontal axis represents each chromosome (drawn to scale) and the vertical axis shows the number of cancer cell lines. Loci showing prominent peaks are annotated.

**Supplementary Figure 4.** Number of homozygous deletions in unexplained homozygous deletion clusters.

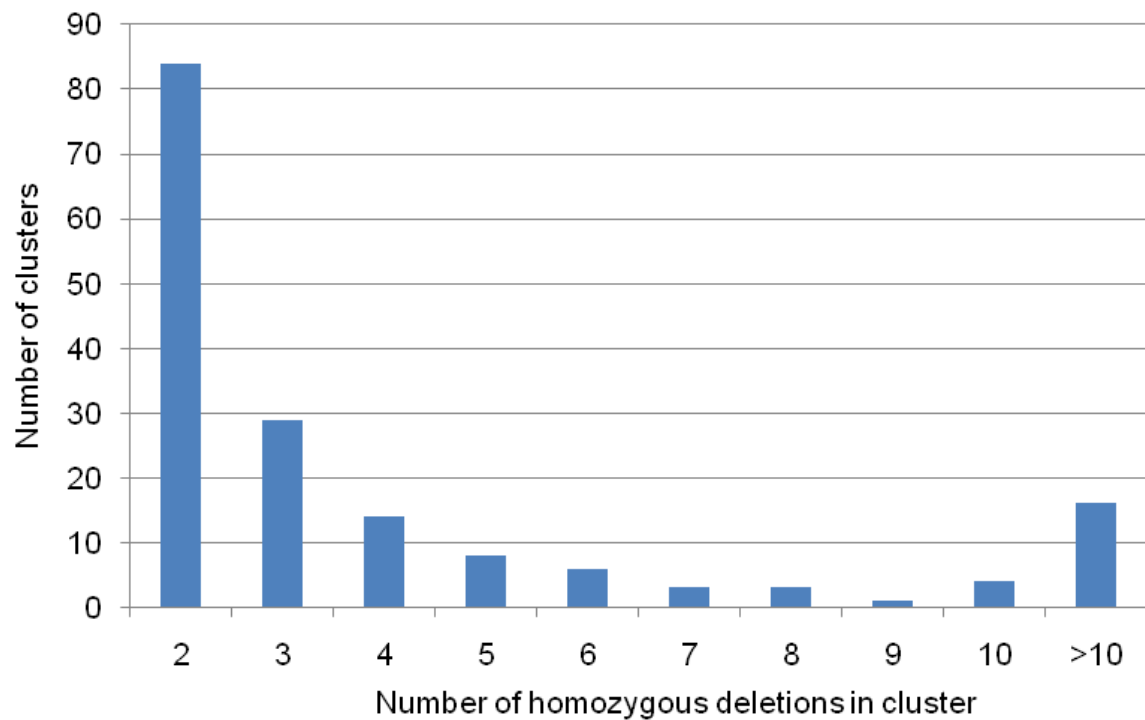

Genome wide there were 33 unexplained clusters containing six or more homozygous deletions identified across the series of 746 cancer cell lines, accounting for 492 homozygous deletions.

**Supplementary Table 1.** Samples used in the study.

### Cancer cell lines

| Site primary                       | No  |
|------------------------------------|-----|
| lung                               | 145 |
| haematopoietic_and_lymphoid_tissue | 124 |
| central_nervous_system             | 55  |
| skin                               | 51  |
| breast                             | 42  |
| autonomic_ganglia                  | 36  |
| large_intestine                    | 36  |
| bone                               | 32  |
| ovary                              | 22  |
| stomach                            | 21  |
| oesophagus                         | 21  |
| kidney                             | 20  |
| upper_aerodigestive_tract          | 20  |
| soft_tissue                        | 19  |
| pancreas                           | 17  |
| urinary_tract                      | 16  |

| Site primary                                | No |
|---------------------------------------------|----|
| thyroid                                     | 11 |
| cervix                                      | 11 |
| endometrium                                 | 9  |
| liver                                       | 8  |
| biliary_tract                               | 6  |
| prostate                                    | 5  |
| pleura                                      | 5  |
| vulva                                       | 3  |
| testis                                      | 3  |
| placenta                                    | 2  |
| adrenal_gland                               | 2  |
| not specified                               | 1  |
| gastrointestinal_tract_(site_indeterminate) | 1  |
| small_intestine                             | 1  |
| eye                                         | 1  |

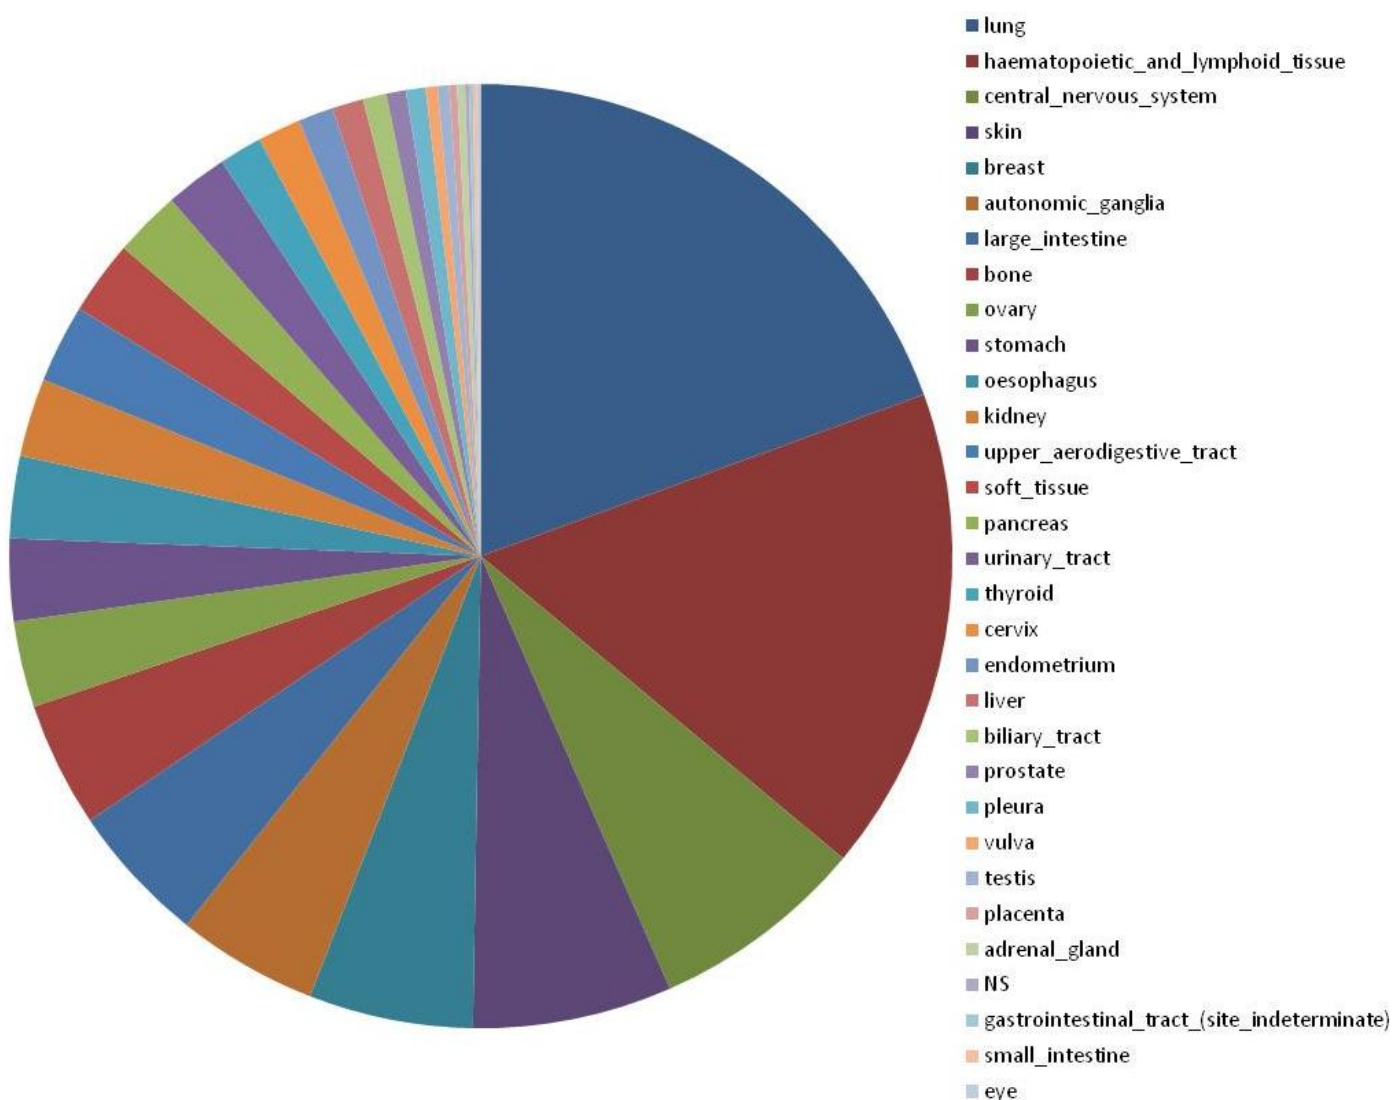

| <b>Name</b> | <b>Site primary</b>                | <b>Histology primary</b> |
|-------------|------------------------------------|--------------------------|
| 380         | haematopoietic_and_lymphoid_tissue | lymphoid_neoplasm        |
| 697         | haematopoietic_and_lymphoid_tissue | haematopoietic_neoplasm  |
| 5637        | urinary_tract                      | carcinoma                |
| 22RV1       | prostate                           | carcinoma                |
| 23132-87    | stomach                            | carcinoma                |
| 639-V       | urinary_tract                      | carcinoma                |
| 647-V       | urinary_tract                      | carcinoma                |
| 786-0       | kidney                             | carcinoma                |
| 8305C       | thyroid                            | carcinoma                |
| 8505C       | thyroid                            | carcinoma                |
| 8-MG-BA     | central_nervous_system             | glioma                   |
| A101D       | skin                               | malignant_melanoma       |
| A172        | central_nervous_system             | glioma                   |
| A204        | soft_tissue                        | rhabdomyosarcoma         |
| A2058       | skin                               | malignant_melanoma       |
| A2780       | ovary                              | carcinoma                |
| A375        | skin                               | malignant_melanoma       |
| A388        | not specified                      | carcinoma                |
| A3-KAW      | stomach                            | carcinoma                |
| A427        | lung                               | carcinoma                |
| A431        | skin                               | carcinoma                |
| A498        | kidney                             | carcinoma                |
| A4-Fuk      | skin                               | malignant_melanoma       |
| A549        | lung                               | carcinoma                |
| A673        | soft_tissue                        | rhabdomyosarcoma         |
| A704        | kidney                             | carcinoma                |
| ABC-1       | lung                               | carcinoma                |
| ACHN        | kidney                             | carcinoma                |
| ACN         | autonomic_ganglia                  | neuroblastoma            |
| AGS         | stomach                            | carcinoma                |
| ALL-PO      | haematopoietic_and_lymphoid_tissue | lymphoid_neoplasm        |
| AM-38       | central_nervous_system             | glioma                   |
| AML-193     | haematopoietic_and_lymphoid_tissue | haematopoietic_neoplasm  |
| AN3-CA      | endometrium                        | carcinoma                |
| ARH-77      | haematopoietic_and_lymphoid_tissue | haematopoietic_neoplasm  |
| AsPC-1      | pancreas                           | carcinoma                |
| ATN-1       | haematopoietic_and_lymphoid_tissue | lymphoid_neoplasm        |
| AU565       | breast                             | carcinoma                |
| B2-17       | central_nervous_system             | glioma                   |
| BALL-1      | haematopoietic_and_lymphoid_tissue | lymphoid_neoplasm        |
| BB30-HNC    | upper_aerodigestive_tract          | carcinoma                |
| BB49-HNC    | upper_aerodigestive_tract          | carcinoma                |
| BB65-RCC    | kidney                             | carcinoma                |
| BC-1        | haematopoietic_and_lymphoid_tissue | lymphoid_neoplasm        |
| BC-3        | haematopoietic_and_lymphoid_tissue | lymphoid_neoplasm        |
| BCPAP       | thyroid                            | carcinoma                |
| BE-13       | haematopoietic_and_lymphoid_tissue | haematopoietic_neoplasm  |
| Becker      | central_nervous_system             | glioma                   |
| BEN         | lung                               | carcinoma                |
| BFTC-905    | urinary_tract                      | carcinoma                |
| BFTC-909    | kidney                             | carcinoma                |
| BHT-101     | thyroid                            | carcinoma                |
| BHY         | upper_aerodigestive_tract          | carcinoma                |
| BL-41       | haematopoietic_and_lymphoid_tissue | lymphoid_neoplasm        |
| BL-70       | haematopoietic_and_lymphoid_tissue | lymphoid_neoplasm        |
| BOKU        | cervix                             | carcinoma                |
| BONNA-12    | haematopoietic_and_lymphoid_tissue | lymphoid_neoplasm        |
| BPH-1       | prostate                           | hyperplasia              |
| BT-20       | breast                             | carcinoma                |
| BT-474      | breast                             | carcinoma                |
| BT-549      | breast                             | carcinoma                |
| BV-173      | haematopoietic_and_lymphoid_tissue | haematopoietic_neoplasm  |
| BxPC-3      | pancreas                           | carcinoma                |

|              |                                    |                                                                |
|--------------|------------------------------------|----------------------------------------------------------------|
| C2BBe1       | large_intestine                    | carcinoma                                                      |
| C32          | skin                               | malignant_melanoma                                             |
| C3A          | liver                              | carcinoma                                                      |
| C-4-II       | cervix                             | carcinoma                                                      |
| C8166        | haematopoietic_and_lymphoid_tissue | lymphoid_neoplasm                                              |
| CA46         | haematopoietic_and_lymphoid_tissue | lymphoid_neoplasm                                              |
| Ca9-22       | upper_aerodigestive_tract          | carcinoma                                                      |
| CADO-ES1     | bone                               | Ewings_sarcoma-<br>peripheral_primitive_neuroectodermal_tumour |
| CAKI-1       | kidney                             | carcinoma                                                      |
| CAL-120      | breast                             | carcinoma                                                      |
| CAL-12T      | lung                               | carcinoma                                                      |
| CAL-148      | breast                             | carcinoma                                                      |
| CAL-27       | upper_aerodigestive_tract          | carcinoma                                                      |
| CAL-33       | upper_aerodigestive_tract          | carcinoma                                                      |
| CAL-39       | vulva                              | carcinoma                                                      |
| CAL-51       | breast                             | carcinoma                                                      |
| CAL-54       | kidney                             | carcinoma                                                      |
| CAL-62       | thyroid                            | carcinoma                                                      |
| CAL-72       | bone                               | osteosarcoma                                                   |
| CAL-85-1     | breast                             | carcinoma                                                      |
| Calu-1       | lung                               | carcinoma                                                      |
| Calu-3       | lung                               | carcinoma                                                      |
| Calu-6       | lung                               | carcinoma                                                      |
| CAMA-1       | breast                             | carcinoma                                                      |
| Caov-3       | ovary                              | carcinoma                                                      |
| Caov-4       | ovary                              | carcinoma                                                      |
| CAPAN-1      | pancreas                           | carcinoma                                                      |
| Capan-2      | pancreas                           | carcinoma                                                      |
| CaR-1        | large_intestine                    | carcinoma                                                      |
| CAS-1        | central_nervous_system             | glioma                                                         |
| Ca-Ski       | cervix                             | carcinoma                                                      |
| CCF-STTG1    | central_nervous_system             | glioma                                                         |
| CCRF-CEM     | haematopoietic_and_lymphoid_tissue | haematopoietic_neoplasm                                        |
| CESS         | haematopoietic_and_lymphoid_tissue | haematopoietic_neoplasm                                        |
| CFPAC-1      | pancreas                           | carcinoma                                                      |
| CGTH-W-1     | thyroid                            | carcinoma                                                      |
| ChaGo-K-1    | lung                               | carcinoma                                                      |
| CHL-1        | skin                               | malignant_melanoma                                             |
| CHP-126      | autonomic_ganglia                  | neuroblastoma                                                  |
| CHP-134      | autonomic_ganglia                  | neuroblastoma                                                  |
| CHP-212      | autonomic_ganglia                  | neuroblastoma                                                  |
| CMK          | haematopoietic_and_lymphoid_tissue | haematopoietic_neoplasm                                        |
| CML-T1       | haematopoietic_and_lymphoid_tissue | haematopoietic_neoplasm                                        |
| COLO-205     | large_intestine                    | carcinoma                                                      |
| COLO-320-HSR | large_intestine                    | carcinoma                                                      |
| COLO-668     | lung                               | carcinoma                                                      |
| COLO-678     | large_intestine                    | carcinoma                                                      |
| COLO-679     | skin                               | malignant_melanoma                                             |
| COLO-680N    | oesophagus                         | carcinoma                                                      |
| COLO-720E    | ovary                              | carcinoma                                                      |
| COLO-741     | large_intestine                    | carcinoma                                                      |
| COLO-792     | skin                               | malignant_melanoma                                             |
| COLO-800     | skin                               | malignant_melanoma                                             |
| COLO-824     | breast                             | carcinoma                                                      |
| COLO-829     | skin                               | malignant_melanoma                                             |
| COR-L105     | lung                               | carcinoma                                                      |
| COR-L23      | lung                               | carcinoma                                                      |
| COR-L279     | lung                               | carcinoma                                                      |
| COR-L51      | lung                               | carcinoma                                                      |
| COR-L88      | lung                               | carcinoma                                                      |
| COR-L96CAR   | lung                               | carcinoma                                                      |
| CP50-MEL-B   | skin                               | malignant_melanoma                                             |
| CP66-MEL     | skin                               | malignant_melanoma                                             |

|            |                                             |                                                  |
|------------|---------------------------------------------|--------------------------------------------------|
| CP67-MEL   | skin                                        | malignant_melanoma                               |
| CPC-N      | lung                                        | carcinoma                                        |
| CRO-AP2    | haematopoietic_and_lymphoid_tissue          | lymphoid_neoplasm                                |
| CRO-AP5    | haematopoietic_and_lymphoid_tissue          | lymphoid_neoplasm                                |
| CTB-1      | haematopoietic_and_lymphoid_tissue          | lymphoid_neoplasm                                |
| CTV-1      | haematopoietic_and_lymphoid_tissue          | haematopoietic_neoplasm                          |
| CW-2       | large_intestine                             | carcinoma                                        |
| D-245MG    | central_nervous_system                      | glioma                                           |
| D-247MG    | central_nervous_system                      | glioma                                           |
| D-263MG    | central_nervous_system                      | glioma                                           |
| D-283MED   | central_nervous_system                      | primitive_neuroectodermal_tumour-medulloblastoma |
| D-336MG    | central_nervous_system                      | glioma                                           |
| D-384MED   | central_nervous_system                      | primitive_neuroectodermal_tumour-medulloblastoma |
| D-392MG    | central_nervous_system                      | glioma                                           |
| D-397MG    | central_nervous_system                      | glioma                                           |
| D-423MG    | central_nervous_system                      | glioma                                           |
| D-458MED   | central_nervous_system                      | primitive_neuroectodermal_tumour-medulloblastoma |
| D-502MG    | central_nervous_system                      | glioma                                           |
| D-538MG    | central_nervous_system                      | glioma                                           |
| D-542MG    | central_nervous_system                      | glioma                                           |
| D-556MED   | central_nervous_system                      | primitive_neuroectodermal_tumour-medulloblastoma |
| D-566MG    | central_nervous_system                      | glioma                                           |
| Daoy       | central_nervous_system                      | primitive_neuroectodermal_tumour-medulloblastoma |
| Daudi      | haematopoietic_and_lymphoid_tissue          | lymphoid_neoplasm                                |
| DB         | haematopoietic_and_lymphoid_tissue          | lymphoid_neoplasm                                |
| DBTRG-05MG | central_nervous_system                      | glioma                                           |
| DEL        | haematopoietic_and_lymphoid_tissue          | lymphoid_neoplasm                                |
| DG-75      | haematopoietic_and_lymphoid_tissue          | lymphoid_neoplasm                                |
| DJM-1      | skin                                        | adnexal_tumour                                   |
| DK-MG      | central_nervous_system                      | glioma                                           |
| DMS-114    | lung                                        | carcinoma                                        |
| DMS-153    | lung                                        | carcinoma                                        |
| DMS-273    | lung                                        | carcinoma                                        |
| DMS-53     | lung                                        | carcinoma                                        |
| DMS-79     | lung                                        | carcinoma                                        |
| DOHH-2     | haematopoietic_and_lymphoid_tissue          | lymphoid_neoplasm                                |
| DOK        | upper_aerodigestive_tract                   | other                                            |
| DoTc2-4510 | cervix                                      | carcinoma                                        |
| DSH1       | urinary_tract                               | carcinoma                                        |
| DU-145     | prostate                                    | carcinoma                                        |
| DU-4475    | breast                                      | carcinoma                                        |
| DV-90      | lung                                        | carcinoma                                        |
| EB2        | haematopoietic_and_lymphoid_tissue          | lymphoid_neoplasm                                |
| EB-3       | haematopoietic_and_lymphoid_tissue          | lymphoid_neoplasm                                |
| ECC10      | stomach                                     | carcinoma                                        |
| ECC12      | stomach                                     | carcinoma                                        |
| ECC4       | gastrointestinal_tract_(site_indeterminate) | carcinoma                                        |
| EC-GI-10   | oesophagus                                  | carcinoma                                        |
| EFE-184    | endometrium                                 | carcinoma                                        |
| EFM-19     | breast                                      | carcinoma                                        |
| EFO-21     | ovary                                       | carcinoma                                        |
| EFO-27     | ovary                                       | carcinoma                                        |
| EGI-1      | biliary_tract                               | carcinoma                                        |
| HEB        | haematopoietic_and_lymphoid_tissue          | lymphoid_neoplasm                                |
| EKVX       | lung                                        | carcinoma                                        |
| EM-2       | haematopoietic_and_lymphoid_tissue          | haematopoietic_neoplasm                          |
| EoL-1-cell | haematopoietic_and_lymphoid_tissue          | haematopoietic_neoplasm                          |
| EPLC-272H  | lung                                        | carcinoma                                        |
| ES1        | bone                                        | Ewings_sarcoma-                                  |

|                |                                    |                                                                |
|----------------|------------------------------------|----------------------------------------------------------------|
|                |                                    | peripheral_primitive_neuroectodermal_tumour                    |
| ES3            | bone                               | Ewings_sarcoma-<br>peripheral_primitive_neuroectodermal_tumour |
| ES4            | bone                               | Ewings_sarcoma-<br>peripheral_primitive_neuroectodermal_tumour |
| ES5            | bone                               | Ewings_sarcoma-<br>peripheral_primitive_neuroectodermal_tumour |
| ES6            | bone                               | Ewings_sarcoma-<br>peripheral_primitive_neuroectodermal_tumour |
| ES7            | bone                               | Ewings_sarcoma-<br>peripheral_primitive_neuroectodermal_tumour |
| ES8            | bone                               | Ewings_sarcoma-<br>peripheral_primitive_neuroectodermal_tumour |
| ESS-1          | endometrium                        | carcinoma                                                      |
| ETK-1          | biliary_tract                      | carcinoma                                                      |
| EVSA-T         | breast                             | carcinoma                                                      |
| EW-1           | bone                               | Ewings_sarcoma-<br>peripheral_primitive_neuroectodermal_tumour |
| EW-11          | bone                               | Ewings_sarcoma-<br>peripheral_primitive_neuroectodermal_tumour |
| EW-12          | bone                               | Ewings_sarcoma-<br>peripheral_primitive_neuroectodermal_tumour |
| EW-13          | bone                               | Ewings_sarcoma-<br>peripheral_primitive_neuroectodermal_tumour |
| EW-16          | bone                               | Ewings_sarcoma-<br>peripheral_primitive_neuroectodermal_tumour |
| EW-18          | bone                               | Ewings_sarcoma-<br>peripheral_primitive_neuroectodermal_tumour |
| EW-22          | bone                               | Ewings_sarcoma-<br>peripheral_primitive_neuroectodermal_tumour |
| EW-24          | bone                               | Ewings_sarcoma-<br>peripheral_primitive_neuroectodermal_tumour |
| EW-3           | bone                               | Ewings_sarcoma-<br>peripheral_primitive_neuroectodermal_tumour |
| EW-7           | bone                               | Ewings_sarcoma-<br>peripheral_primitive_neuroectodermal_tumour |
| FADU           | upper_aerodigestive_tract          | carcinoma                                                      |
| FTC-133        | thyroid                            | carcinoma                                                      |
| G-361          | skin                               | malignant_melanoma                                             |
| G-401          | kidney                             | Wilms_tumour                                                   |
| G-402          | soft_tissue                        | leiomyoblastoma                                                |
| GA-10-Clone-20 | haematopoietic_and_lymphoid_tissue | lymphoid_neoplasm                                              |
| GA-10-Clone-4  | haematopoietic_and_lymphoid_tissue | lymphoid_neoplasm                                              |
| GAK            | skin                               | malignant_melanoma                                             |
| GAMG           | central_nervous_system             | glioma                                                         |
| GB-1           | central_nervous_system             | glioma                                                         |
| GCIY           | stomach                            | carcinoma                                                      |
| GCT            | soft_tissue                        | malignant_fibrous_histiocytoma-<br>pleomorphic_sarcoma         |
| GDM-1          | haematopoietic_and_lymphoid_tissue | haematopoietic_neoplasm                                        |
| GI-1           | central_nervous_system             | glioma                                                         |
| GI-ME-N        | autonomic_ganglia                  | neuroblastoma                                                  |
| GMS-10         | central_nervous_system             | glioma                                                         |
| GOTO           | autonomic_ganglia                  | neuroblastoma                                                  |
| Gp2D           | large_intestine                    | carcinoma                                                      |
| GR-ST          | haematopoietic_and_lymphoid_tissue | haematopoietic_neoplasm                                        |
| GT3TKB         | stomach                            | carcinoma                                                      |
| H4             | central_nervous_system             | glioma                                                         |
| H9             | haematopoietic_and_lymphoid_tissue | lymphoid_neoplasm                                              |
| HA7-RCC        | kidney                             | carcinoma                                                      |
| HAL-01         | haematopoietic_and_lymphoid_tissue | lymphoid_neoplasm                                              |
| HC-1           | haematopoietic_and_lymphoid_tissue | lymphoid_neoplasm                                              |
| HCC1143        | breast                             | carcinoma                                                      |
| HCC1187        | breast                             | carcinoma                                                      |

|              |                                    |                         |
|--------------|------------------------------------|-------------------------|
| HCC1395      | breast                             | carcinoma               |
| HCC1569      | breast                             | carcinoma               |
| HCC1599      | breast                             | carcinoma               |
| HCC1806      | breast                             | carcinoma               |
| HCC1954      | breast                             | carcinoma               |
| HCC2157      | breast                             | carcinoma               |
| HCC2218      | breast                             | carcinoma               |
| HCC2998      | large_intestine                    | carcinoma               |
| HCC38        | breast                             | carcinoma               |
| HCC70        | breast                             | carcinoma               |
| HCE-4        | oesophagus                         | carcinoma               |
| HCE-T        | upper_aerodigestive_tract          | carcinoma               |
| HCT-116      | large_intestine                    | carcinoma               |
| HCT-15       | large_intestine                    | carcinoma               |
| HDLM-2       | haematopoietic_and_lymphoid_tissue | lymphoid_neoplasm       |
| HD-MY-Z      | haematopoietic_and_lymphoid_tissue | lymphoid_neoplasm       |
| HEC-1        | endometrium                        | carcinoma               |
| HEL          | haematopoietic_and_lymphoid_tissue | haematopoietic_neoplasm |
| HeLaSF       | cervix                             | carcinoma               |
| H-EMC-SS     | bone                               | chondrosarcoma          |
| HGC-27       | stomach                            | carcinoma               |
| HH           | haematopoietic_and_lymphoid_tissue | lymphoid_neoplasm       |
| HL-60        | haematopoietic_and_lymphoid_tissue | haematopoietic_neoplasm |
| HLE          | liver                              | carcinoma               |
| HMV-II       | skin                               | malignant_melanoma      |
| HN           | upper_aerodigestive_tract          | carcinoma               |
| HO-1-N-1     | upper_aerodigestive_tract          | carcinoma               |
| HOP-62       | lung                               | carcinoma               |
| HOP-92       | lung                               | carcinoma               |
| HOS          | bone                               | osteosarcoma            |
| HPAF-II      | pancreas                           | carcinoma               |
| Hs-578-T     | breast                             | carcinoma               |
| HSC-2        | upper_aerodigestive_tract          | carcinoma               |
| HSC-3        | upper_aerodigestive_tract          | carcinoma               |
| HSC-4        | upper_aerodigestive_tract          | carcinoma               |
| HT           | haematopoietic_and_lymphoid_tissue | lymphoid_neoplasm       |
| HT-1080      | soft tissue                        | fibrosarcoma            |
| HT-1197      | urinary_tract                      | carcinoma               |
| HT-1376      | urinary_tract                      | carcinoma               |
| HT-144       | skin                               | malignant_melanoma      |
| HT-29        | large_intestine                    | carcinoma               |
| HT-3         | cervix                             | carcinoma               |
| HT55         | large_intestine                    | carcinoma               |
| HTC-C3       | thyroid                            | carcinoma               |
| HuCCT1       | biliary_tract                      | carcinoma               |
| HuH-28       | biliary_tract                      | carcinoma               |
| HUH-6-clone5 | liver                              | carcinoma               |
| HuO-3N1      | bone                               | osteosarcoma            |
| HuO9         | bone                               | osteosarcoma            |
| HuP-T3       | pancreas                           | carcinoma               |
| HuP-T4       | pancreas                           | carcinoma               |
| HUTU-80      | small_intestine                    | carcinoma               |
| IA-LM        | lung                               | carcinoma               |
| IGR-1        | skin                               | malignant_melanoma      |
| IGROV-1      | ovary                              | carcinoma               |
| IM-9         | haematopoietic_and_lymphoid_tissue | lymphoid_neoplasm       |
| IMR-5        | autonomic_ganglia                  | neuroblastoma           |
| IPC-298      | skin                               | malignant_melanoma      |
| IST-MEL1     | skin                               | malignant_melanoma      |
| IST-MES1     | pleura                             | mesothelioma            |
| IST-SL1      | lung                               | carcinoma               |
| IST-SL2      | lung                               | carcinoma               |
| ITO-II       | testis                             | germ_cell_tumour        |
| J82          | urinary_tract                      | carcinoma               |

|              |                                    |                         |
|--------------|------------------------------------|-------------------------|
| JAR          | placenta                           | choriocarcinoma         |
| JEG-3        | placenta                           | choriocarcinoma         |
| JiyoyeP-2003 | haematopoietic_and_lymphoid_tissue | lymphoid_neoplasm       |
| J-RT3-T3-5   | haematopoietic_and_lymphoid_tissue | lymphoid_neoplasm       |
| JVM-2        | haematopoietic_and_lymphoid_tissue | lymphoid_neoplasm       |
| JVM-3        | haematopoietic_and_lymphoid_tissue | lymphoid_neoplasm       |
| K052         | haematopoietic_and_lymphoid_tissue | haematopoietic_neoplasm |
| K5           | thyroid                            | carcinoma               |
| K-562        | haematopoietic_and_lymphoid_tissue | haematopoietic_neoplasm |
| KALS-1       | central_nervous_system             | glioma                  |
| KARPAS-299   | haematopoietic_and_lymphoid_tissue | lymphoid_neoplasm       |
| KARPAS-422   | haematopoietic_and_lymphoid_tissue | lymphoid_neoplasm       |
| KARPAS-45    | haematopoietic_and_lymphoid_tissue | haematopoietic_neoplasm |
| KASUMI-1     | haematopoietic_and_lymphoid_tissue | haematopoietic_neoplasm |
| KATOIII      | stomach                            | carcinoma               |
| KE-37        | haematopoietic_and_lymphoid_tissue | haematopoietic_neoplasm |
| KG-1         | haematopoietic_and_lymphoid_tissue | haematopoietic_neoplasm |
| KGN          | ovary                              | other                   |
| KINGS-1      | central_nervous_system             | glioma                  |
| KLE          | endometrium                        | carcinoma               |
| KM12         | large_intestine                    | carcinoma               |
| KM-H2        | haematopoietic_and_lymphoid_tissue | lymphoid_neoplasm       |
| KMOE-2       | haematopoietic_and_lymphoid_tissue | haematopoietic_neoplasm |
| KMS-12-PE    | haematopoietic_and_lymphoid_tissue | lymphoid_neoplasm       |
| KNS-42       | central_nervous_system             | glioma                  |
| KNS-62       | lung                               | carcinoma               |
| KNS-81-FD    | central_nervous_system             | glioma                  |
| KOSC-2       | upper_aerodigestive_tract          | carcinoma               |
| KP-4         | pancreas                           | carcinoma               |
| KP-N-RT-BM-1 | autonomic_ganglia                  | neuroblastoma           |
| KP-N-S19s    | autonomic_ganglia                  | neuroblastoma           |
| KP-N-YN      | autonomic_ganglia                  | neuroblastoma           |
| KP-N-YS      | autonomic_ganglia                  | neuroblastoma           |
| KS-1         | central_nervous_system             | glioma                  |
| KU-19-19     | urinary_tract                      | carcinoma               |
| KU812        | haematopoietic_and_lymphoid_tissue | haematopoietic_neoplasm |
| KURAMOCHI    | ovary                              | carcinoma               |
| KY821        | haematopoietic_and_lymphoid_tissue | haematopoietic_neoplasm |
| KYSE-140     | oesophagus                         | carcinoma               |
| KYSE-150     | oesophagus                         | carcinoma               |
| KYSE-270     | oesophagus                         | carcinoma               |
| KYSE-410     | oesophagus                         | carcinoma               |
| KYSE-450     | oesophagus                         | carcinoma               |
| KYSE-510     | oesophagus                         | carcinoma               |
| KYSE-520     | oesophagus                         | carcinoma               |
| KYSE-70      | oesophagus                         | carcinoma               |
| L-363        | haematopoietic_and_lymphoid_tissue | lymphoid_neoplasm       |
| L-428        | haematopoietic_and_lymphoid_tissue | lymphoid_neoplasm       |
| L-540        | haematopoietic_and_lymphoid_tissue | lymphoid_neoplasm       |
| LAMA-84      | haematopoietic_and_lymphoid_tissue | haematopoietic_neoplasm |
| LAN-1        | autonomic_ganglia                  | neuroblastoma           |
| LAN-5        | autonomic_ganglia                  | neuroblastoma           |
| LAN-6        | autonomic_ganglia                  | neuroblastoma           |
| LB1047-RCC   | kidney                             | carcinoma               |
| LB2518-MEL   | skin                               | malignant_melanoma      |
| LB373-MEL-D  | skin                               | malignant_melanoma      |
| LB647-SCLC   | lung                               | carcinoma               |
| LB771-HNC    | upper_aerodigestive_tract          | carcinoma               |
| LB831-BLC    | urinary_tract                      | carcinoma               |
| LB996-RCC    | kidney                             | carcinoma               |
| LC-2-ad      | lung                               | carcinoma               |
| LC4-1        | haematopoietic_and_lymphoid_tissue | haematopoietic_neoplasm |
| LCLC-97TM1   | lung                               | carcinoma               |
| LK-2         | lung                               | carcinoma               |

|                 |                                    |                                                                |
|-----------------|------------------------------------|----------------------------------------------------------------|
| LN-405          | central_nervous_system             | glioma                                                         |
| LNCaP-Clone-FGC | prostate                           | carcinoma                                                      |
| LOUCY           | haematopoietic_and_lymphoid_tissue | lymphoid_neoplasm                                              |
| LoVo            | large_intestine                    | carcinoma                                                      |
| LOXIMVI         | skin                               | malignant_melanoma                                             |
| LP-1            | haematopoietic_and_lymphoid_tissue | lymphoid_neoplasm                                              |
| LS-1034         | large_intestine                    | carcinoma                                                      |
| LS-123          | large_intestine                    | carcinoma                                                      |
| LS-174T         | large_intestine                    | carcinoma                                                      |
| LS-411N         | large_intestine                    | carcinoma                                                      |
| LS-513          | large_intestine                    | carcinoma                                                      |
| LU-134-A        | lung                               | carcinoma                                                      |
| LU-135          | lung                               | carcinoma                                                      |
| LU-139          | lung                               | carcinoma                                                      |
| LU-165          | lung                               | carcinoma                                                      |
| LU-65           | lung                               | carcinoma                                                      |
| LU-99A          | lung                               | carcinoma                                                      |
| LXF-289         | lung                               | carcinoma                                                      |
| M059J           | central_nervous_system             | glioma                                                         |
| Malme-3M        | skin                               | malignant_melanoma                                             |
| MC-1010         | haematopoietic_and_lymphoid_tissue | haematopoietic_neoplasm                                        |
| MC116           | haematopoietic_and_lymphoid_tissue | lymphoid_neoplasm                                              |
| MC-CAR          | haematopoietic_and_lymphoid_tissue | lymphoid_neoplasm                                              |
| MCF7            | breast                             | carcinoma                                                      |
| MC-IXC          | autonomic_ganglia                  | neuroblastoma                                                  |
| MDA-MB-134-VI   | breast                             | carcinoma                                                      |
| MDA-MB-157      | breast                             | carcinoma                                                      |
| MDA-MB-175-VII  | breast                             | carcinoma                                                      |
| MDA-MB-231      | breast                             | carcinoma                                                      |
| MDA-MB-361      | breast                             | carcinoma                                                      |
| MDA-MB-415      | breast                             | carcinoma                                                      |
| MDA-MB-435      | breast                             | carcinoma                                                      |
| MDA-MB-453      | breast                             | carcinoma                                                      |
| MDA-MB-468      | breast                             | carcinoma                                                      |
| ME-180          | cervix                             | carcinoma                                                      |
| MEG-01          | haematopoietic_and_lymphoid_tissue | haematopoietic_neoplasm                                        |
| MEL-HO          | skin                               | malignant_melanoma                                             |
| MEL-JUSO        | skin                               | malignant_melanoma                                             |
| MES-SA          | soft_tissue                        | sarcoma                                                        |
| Mewo            | skin                               | malignant_melanoma                                             |
| MFE-280         | endometrium                        | carcinoma                                                      |
| MFE-296         | endometrium                        | carcinoma                                                      |
| MFH-ino         | soft_tissue                        | malignant_fibrous_histiocytoma-<br>pleomorphic_sarcoma         |
| MFM-223         | breast                             | carcinoma                                                      |
| MG-63           | bone                               | osteosarcoma                                                   |
| MHH-CALL-2      | haematopoietic_and_lymphoid_tissue | lymphoid_neoplasm                                              |
| MHH-CALL-4      | haematopoietic_and_lymphoid_tissue | lymphoid_neoplasm                                              |
| MHH-ES-1        | bone                               | Ewings_sarcoma-<br>peripheral_primitive_neuroectodermal_tumour |
| MHH-NB-11       | autonomic_ganglia                  | neuroblastoma                                                  |
| MHH-PREB-1      | haematopoietic_and_lymphoid_tissue | lymphoid_neoplasm                                              |
| MIA-PaCa-2      | pancreas                           | carcinoma                                                      |
| MJ              | haematopoietic_and_lymphoid_tissue | lymphoid_neoplasm                                              |
| MKN1            | stomach                            | carcinoma                                                      |
| MKN28           | stomach                            | carcinoma                                                      |
| MKN45           | stomach                            | carcinoma                                                      |
| MKN7            | stomach                            | carcinoma                                                      |
| ML-2            | haematopoietic_and_lymphoid_tissue | haematopoietic_neoplasm                                        |
| MLMA            | skin                               | malignant_melanoma                                             |
| MMAC-SF         | skin                               | malignant_melanoma                                             |

|            |                                    |                         |
|------------|------------------------------------|-------------------------|
| MN-60      | haematopoietic_and_lymphoid_tissue | lymphoid_neoplasm       |
| MOG-G-CCM  | central_nervous_system             | glioma                  |
| MOLT-13    | haematopoietic_and_lymphoid_tissue | lymphoid_neoplasm       |
| MOLT-16    | haematopoietic_and_lymphoid_tissue | lymphoid_neoplasm       |
| MOLT-4     | haematopoietic_and_lymphoid_tissue | haematopoietic_neoplasm |
| MONO-MAC-6 | haematopoietic_and_lymphoid_tissue | haematopoietic_neoplasm |
| MPP-89     | pleura                             | mesothelioma            |
| MRK-nu-1   | breast                             | carcinoma               |
| MS-1       | lung                               | carcinoma               |
| MUTZ-1     | haematopoietic_and_lymphoid_tissue | haematopoietic_neoplasm |
| MZ1-PC     | pancreas                           | carcinoma               |
| MZ2-MEL    | skin                               | malignant_melanoma      |
| MZ7-mel    | skin                               | malignant_melanoma      |
| NALM-1     | haematopoietic_and_lymphoid_tissue | haematopoietic_neoplasm |
| NALM-6     | haematopoietic_and_lymphoid_tissue | lymphoid_neoplasm       |
| NB1        | autonomic_ganglia                  | neuroblastoma           |
| NB10       | autonomic_ganglia                  | neuroblastoma           |
| NB12       | autonomic_ganglia                  | neuroblastoma           |
| NB13       | autonomic_ganglia                  | neuroblastoma           |
| NB14       | autonomic_ganglia                  | neuroblastoma           |
| NB16       | autonomic_ganglia                  | neuroblastoma           |
| NB17       | autonomic_ganglia                  | neuroblastoma           |
| NB4        | haematopoietic_and_lymphoid_tissue | haematopoietic_neoplasm |
| NB5        | autonomic_ganglia                  | neuroblastoma           |
| NB6        | autonomic_ganglia                  | neuroblastoma           |
| NB69       | autonomic_ganglia                  | neuroblastoma           |
| NB7        | autonomic_ganglia                  | neuroblastoma           |
| NBsusSR    | autonomic_ganglia                  | neuroblastoma           |
| NCCIT      | testis                             | germ_cell_tumour        |
| NCI-H1048  | lung                               | carcinoma               |
| NCI-H1092  | lung                               | carcinoma               |
| NCI-H1105  | lung                               | carcinoma               |
| NCI-H1155  | lung                               | carcinoma               |
| NCI-H1173  | lung                               | carcinoma               |
| NCI-H128   | lung                               | carcinoma               |
| NCI-H1304  | lung                               | carcinoma               |
| NCI-H1355  | lung                               | carcinoma               |
| NCI-H1395  | lung                               | carcinoma               |
| NCI-H1417  | lung                               | carcinoma               |
| NCI-H1437  | lung                               | carcinoma               |
| NCI-H146   | lung                               | carcinoma               |
| NCI-H1522  | lung                               | carcinoma               |
| NCI-H1563  | lung                               | carcinoma               |
| NCI-H157   | lung                               | carcinoma               |
| NCI-H1573  | lung                               | carcinoma               |
| NCI-H1581  | lung                               | carcinoma               |
| NCI-H1618  | lung                               | carcinoma               |
| NCI-H1623  | lung                               | carcinoma               |
| NCI-H1648  | lung                               | carcinoma               |
| NCI-H1650  | lung                               | carcinoma               |
| NCI-H1666  | lung                               | carcinoma               |
| NCI-H1693  | lung                               | carcinoma               |
| NCI-H1694  | lung                               | carcinoma               |
| NCI-H1703  | lung                               | carcinoma               |
| NCI-H1734  | lung                               | carcinoma               |
| NCI-H1755  | lung                               | carcinoma               |
| NCI-H1770  | lung                               | carcinoma               |
| NCI-H1792  | lung                               | carcinoma               |
| NCI-H1793  | lung                               | carcinoma               |
| NCI-H1838  | lung                               | carcinoma               |
| NCI-H1882  | lung                               | carcinoma               |
| NCI-H1926  | lung                               | carcinoma               |
| NCI-H1930  | lung                               | carcinoma               |
| NCI-H1963  | lung                               | carcinoma               |

|           |                 |                            |
|-----------|-----------------|----------------------------|
| NCI-H1975 | lung            | carcinoma                  |
| NCI-H1993 | lung            | carcinoma                  |
| NCI-H2009 | lung            | carcinoma                  |
| NCI-H2029 | lung            | carcinoma                  |
| NCI-H2030 | lung            | carcinoma                  |
| NCI-H2052 | pleura          | mesothelioma               |
| NCI-H2081 | lung            | carcinoma                  |
| NCI-H2087 | lung            | carcinoma                  |
| NCI-H209  | lung            | carcinoma                  |
| NCI-H2107 | lung            | carcinoma                  |
| NCI-H2122 | lung            | carcinoma                  |
| NCI-H2126 | lung            | carcinoma                  |
| NCI-H2141 | lung            | carcinoma                  |
| NCI-H2170 | lung            | carcinoma                  |
| NCI-H2171 | lung            | carcinoma                  |
| NCI-H2196 | lung            | carcinoma                  |
| NCI-H2227 | lung            | carcinoma                  |
| NCI-H2228 | lung            | carcinoma                  |
| NCI-H226  | lung            | carcinoma                  |
| NCI-H2291 | lung            | carcinoma                  |
| NCI-H23   | lung            | carcinoma                  |
| NCI-H2330 | lung            | carcinoma                  |
| NCI-H2342 | lung            | carcinoma                  |
| NCI-H2347 | lung            | carcinoma                  |
| NCI-H2405 | lung            | carcinoma                  |
| NCI-H2452 | pleura          | mesothelioma               |
| NCI-H250  | lung            | carcinoma                  |
| NCI-H28   | pleura          | mesothelioma               |
| NCI-H292  | lung            | carcinoma                  |
| NCI-H295  | adrenal_gland   | adrenal_cortical_carcinoma |
| NCI-H322M | lung            | carcinoma                  |
| NCI-H345  | lung            | carcinoma                  |
| NCI-H358  | lung            | carcinoma                  |
| NCI-H378  | lung            | carcinoma                  |
| NCI-H441  | lung            | carcinoma                  |
| NCI-H446  | lung            | carcinoma                  |
| NCI-H460  | lung            | carcinoma                  |
| NCI-H508  | large_intestine | carcinoma                  |
| NCI-H510A | lung            | carcinoma                  |
| NCI-H520  | lung            | carcinoma                  |
| NCI-H522  | lung            | carcinoma                  |
| NCI-H524  | lung            | carcinoma                  |
| NCI-H526  | lung            | carcinoma                  |
| NCI-H596  | lung            | carcinoma                  |
| NCI-H630  | large_intestine | carcinoma                  |
| NCI-H64   | lung            | carcinoma                  |
| NCI-H650  | lung            | carcinoma                  |
| NCI-H661  | lung            | carcinoma                  |
| NCI-H69   | lung            | carcinoma                  |
| NCI-H716  | large_intestine | carcinoma                  |
| NCI-H719  | lung            | carcinoma                  |
| NCI-H720  | lung            | carcinoid-endocrine_tumour |
| NCI-H727  | lung            | carcinoid-endocrine_tumour |
| NCI-H747  | large_intestine | carcinoma                  |
| NCI-H748  | lung            | carcinoma                  |
| NCI-H774  | lung            | carcinoma                  |
| NCI-H810  | lung            | carcinoma                  |
| NCI-H82   | lung            | carcinoma                  |
| NCI-H835  | lung            | carcinoid-endocrine_tumour |
| NCI-H838  | lung            | carcinoma                  |
| NCI-H889  | lung            | carcinoma                  |
| NCI-N417  | lung            | carcinoma                  |
| NCI-N87   | stomach         | carcinoma                  |
| NCI-SNU-1 | stomach         | carcinoma                  |

|                |                                    |                                                  |
|----------------|------------------------------------|--------------------------------------------------|
| NCI-SNU-16     | stomach                            | carcinoma                                        |
| NCI-SNU-5      | stomach                            | carcinoma                                        |
| NEC8           | testis                             | germ_cell_tumour                                 |
| NH-12          | autonomic_ganglia                  | neuroblastoma                                    |
| NH-6           | autonomic_ganglia                  | neuroblastoma                                    |
| NKM-1          | haematopoietic_and_lymphoid_tissue | haematopoietic_neoplasm                          |
| NMC-G1         | central_nervous_system             | glioma                                           |
| no-10          | central_nervous_system             | glioma                                           |
| no-11          | central_nervous_system             | glioma                                           |
| NOMO-1         | haematopoietic_and_lymphoid_tissue | haematopoietic_neoplasm                          |
| NOS-1          | bone                               | osteosarcoma                                     |
| NUGC-3         | stomach                            | carcinoma                                        |
| NY             | bone                               | osteosarcoma                                     |
| OWA-28         | ovary                              | carcinoma                                        |
| OWA-42         | ovary                              | carcinoma                                        |
| OC-314         | ovary                              | carcinoma                                        |
| OCI-AML2       | haematopoietic_and_lymphoid_tissue | haematopoietic_neoplasm                          |
| OCUB-M         | breast                             | carcinoma                                        |
| OE19           | oesophagus                         | carcinoma                                        |
| OMC-1          | cervix                             | carcinoma                                        |
| ONS-76         | central_nervous_system             | primitive_neuroectodermal_tumour-medulloblastoma |
| OPM-2          | haematopoietic_and_lymphoid_tissue | haematopoietic_neoplasm                          |
| OS-RC-2        | kidney                             | carcinoma                                        |
| OVCAR-3        | ovary                              | carcinoma                                        |
| OVCAR-4        | ovary                              | carcinoma                                        |
| OVCAR-5        | ovary                              | carcinoma                                        |
| OVCAR-8        | ovary                              | carcinoma                                        |
| P12-ICHIKAWA   | haematopoietic_and_lymphoid_tissue | lymphoid_neoplasm                                |
| P30-OHK        | haematopoietic_and_lymphoid_tissue | lymphoid_neoplasm                                |
| P31-FUJ        | haematopoietic_and_lymphoid_tissue | haematopoietic_neoplasm                          |
| PA-1           | ovary                              | germ_cell_tumour                                 |
| PANC-03-27     | pancreas                           | carcinoma                                        |
| PANC-08-13     | pancreas                           | carcinoma                                        |
| PANC-10-05     | pancreas                           | carcinoma                                        |
| PC-14          | lung                               | carcinoma                                        |
| PC-3           | prostate                           | carcinoma                                        |
| PD1501a        | skin                               |                                                  |
| PD1502a        | skin                               |                                                  |
| PD1503a        | skin                               |                                                  |
| PD1504a        | skin                               |                                                  |
| PF-382         | haematopoietic_and_lymphoid_tissue | lymphoid_neoplasm                                |
| PFSK-1         | central_nervous_system             | primitive_neuroectodermal_tumour-medulloblastoma |
| PLC-PRF-5      | liver                              | carcinoma                                        |
| PSN1           | pancreas                           | carcinoma                                        |
| QIMR-WIL       | haematopoietic_and_lymphoid_tissue | haematopoietic_neoplasm                          |
| Raji           | haematopoietic_and_lymphoid_tissue | lymphoid_neoplasm                                |
| Ramos-2G6-4C10 | haematopoietic_and_lymphoid_tissue | lymphoid_neoplasm                                |
| RCC10RGB       | kidney                             | carcinoma                                        |
| RCM-1          | large_intestine                    | carcinoma                                        |
| RD             | soft_tissue                        | rhabdomyosarcoma                                 |
| REH            | haematopoietic_and_lymphoid_tissue | lymphoid_neoplasm                                |
| RERF-LC-FM     | lung                               | carcinoma                                        |
| RERF-LC-MS     | lung                               | carcinoma                                        |
| RF-48          | stomach                            | carcinoma                                        |
| RH-1           | soft_tissue                        | rhabdomyosarcoma                                 |
| RH-18          | soft_tissue                        | rhabdomyosarcoma                                 |
| RKO            | large_intestine                    | carcinoma                                        |
| RL             | haematopoietic_and_lymphoid_tissue | lymphoid_neoplasm                                |
| RL95-2         | endometrium                        | carcinoma                                        |
| RMG-I          | ovary                              | carcinoma                                        |
| RO82-W-1       | thyroid                            | carcinoma                                        |

|           |                                    |                                                                |
|-----------|------------------------------------|----------------------------------------------------------------|
| RPMI-6666 | haematopoietic_and_lymphoid_tissue | lymphoid_neoplasm                                              |
| RPMI-7951 | skin                               | malignant_melanoma                                             |
| RPMI-8226 | haematopoietic_and_lymphoid_tissue | haematopoietic_neoplasm                                        |
| RPMI-8402 | haematopoietic_and_lymphoid_tissue | lymphoid_neoplasm                                              |
| RPMI-8866 | haematopoietic_and_lymphoid_tissue | haematopoietic_neoplasm                                        |
| RS4-11    | haematopoietic_and_lymphoid_tissue | haematopoietic_neoplasm                                        |
| RT-112    | urinary_tract                      | carcinoma                                                      |
| RT4       | urinary_tract                      | carcinoma                                                      |
| RTSG      | ovary                              | carcinoma                                                      |
| RVH-421   | skin                               | malignant_melanoma                                             |
| RXF393    | kidney                             | carcinoma                                                      |
| S-117     | soft_tissue                        | sarcoma                                                        |
| Saos-2    | bone                               | osteosarcoma                                                   |
| SAS       | upper_aerodigestive_tract          | carcinoma                                                      |
| SBC-1     | lung                               | carcinoma                                                      |
| SBC-5     | lung                               | carcinoma                                                      |
| SCC-25    | upper_aerodigestive_tract          | carcinoma                                                      |
| SCC-3     | haematopoietic_and_lymphoid_tissue | lymphoid_neoplasm                                              |
| SCC-4     | upper_aerodigestive_tract          | carcinoma                                                      |
| SCC-9     | upper_aerodigestive_tract          | carcinoma                                                      |
| SCCH-26   | autonomic_ganglia                  | neuroblastoma                                                  |
| SCH       | stomach                            | other                                                          |
| SCLC-21H  | lung                               | carcinoma                                                      |
| SF126     | central_nervous_system             | glioma                                                         |
| SF268     | central_nervous_system             | glioma                                                         |
| SF295     | central_nervous_system             | glioma                                                         |
| SF539     | central_nervous_system             | glioma                                                         |
| SH-4      | skin                               | malignant_melanoma                                             |
| SHP-77    | lung                               | carcinoma                                                      |
| SIG-M5    | haematopoietic_and_lymphoid_tissue | haematopoietic_neoplasm                                        |
| SiHa      | cervix                             | carcinoma                                                      |
| SIMA      | autonomic_ganglia                  | neuroblastoma                                                  |
| SJRH30    | soft_tissue                        | rhabdomyosarcoma                                               |
| SJSA-1    | bone                               | other                                                          |
| SK-CO-1   | large_intestine                    | carcinoma                                                      |
| SKG-IIIa  | cervix                             | carcinoma                                                      |
| SK-HEP-1  | liver                              | carcinoma                                                      |
| SK-LMS-1  | soft_tissue                        | sarcoma                                                        |
| SK-LU-1   | lung                               | carcinoma                                                      |
| SKM-1     | haematopoietic_and_lymphoid_tissue | haematopoietic_neoplasm                                        |
| SK-MEL-1  | skin                               | malignant_melanoma                                             |
| SK-MEL-2  | skin                               | malignant_melanoma                                             |
| SK-MEL-24 | skin                               | malignant_melanoma                                             |
| SK-MEL-28 | skin                               | malignant_melanoma                                             |
| SK-MEL-3  | skin                               | malignant_melanoma                                             |
| SK-MEL-30 | skin                               | malignant_melanoma                                             |
| SK-MEL-5  | skin                               | malignant_melanoma                                             |
| SK-MES-1  | lung                               | carcinoma                                                      |
| SK-MG-1   | central_nervous_system             | glioma                                                         |
| SK-MM-2   | haematopoietic_and_lymphoid_tissue | lymphoid_neoplasm                                              |
| SK-N-AS   | autonomic_ganglia                  | neuroblastoma                                                  |
| SK-N-DZ   | autonomic_ganglia                  | neuroblastoma                                                  |
| SK-NEP-1  | kidney                             | Wilms_tumour                                                   |
| SK-N-FI   | autonomic_ganglia                  | neuroblastoma                                                  |
| SK-OV-3   | ovary                              | carcinoma                                                      |
| SK-PN-DW  | bone                               | Ewings_sarcoma-<br>peripheral_primitive_neuroectodermal_tumour |
| SK-UT-1   | soft_tissue                        | leiomyosarcoma                                                 |
| SN12C     | kidney                             | carcinoma                                                      |
| SNB75     | central_nervous_system             | glioma                                                         |
| SNG-M     | endometrium                        | carcinoma                                                      |
| SNU-387   | liver                              | carcinoma                                                      |
| SNU-449   | liver                              | carcinoma                                                      |
| SNU-475   | liver                              | carcinoma                                                      |

|           |                                    |                            |
|-----------|------------------------------------|----------------------------|
| SNU-C1    | large_intestine                    | carcinoma                  |
| SNU-C2B   | large_intestine                    | carcinoma                  |
| SR        | haematopoietic_and_lymphoid_tissue | lymphoid_neoplasm          |
| ST486     | haematopoietic_and_lymphoid_tissue | lymphoid_neoplasm          |
| SU-DHL-1  | haematopoietic_and_lymphoid_tissue | lymphoid_neoplasm          |
| SUP-B8    | haematopoietic_and_lymphoid_tissue | lymphoid_neoplasm          |
| SUP-T1    | haematopoietic_and_lymphoid_tissue | lymphoid_neoplasm          |
| SW1088    | central_nervous_system             | glioma                     |
| SW13      | adrenal_gland                      | adrenal_cortical_carcinoma |
| SW1417    | large_intestine                    | carcinoma                  |
| SW1463    | large_intestine                    | carcinoma                  |
| SW1573    | lung                               | carcinoma                  |
| SW1990    | pancreas                           | carcinoma                  |
| SW48      | large_intestine                    | carcinoma                  |
| SW620     | large_intestine                    | carcinoma                  |
| SW626     | ovary                              | carcinoma                  |
| SW684     | soft_tissue                        | fibrosarcoma               |
| SW780     | urinary_tract                      | carcinoma                  |
| SW837     | large_intestine                    | carcinoma                  |
| SW872     | soft_tissue                        | liposarcoma                |
| SW900     | lung                               | carcinoma                  |
| SW948     | large_intestine                    | carcinoma                  |
| SW954     | vulva                              | carcinoma                  |
| SW962     | vulva                              | carcinoma                  |
| SW982     | soft_tissue                        | synovial_sarcoma           |
| T47D      | breast                             | carcinoma                  |
| T84       | large_intestine                    | carcinoma                  |
| T98G      | central_nervous_system             | glioma                     |
| TALL-1    | haematopoietic_and_lymphoid_tissue | lymphoid_neoplasm          |
| TCCSUP    | urinary_tract                      | carcinoma                  |
| TC-YIK    | cervix                             | carcinoma                  |
| TE-1      | oesophagus                         | carcinoma                  |
| TE-10     | oesophagus                         | carcinoma                  |
| TE-11     | oesophagus                         | carcinoma                  |
| TE-12     | oesophagus                         | carcinoma                  |
| TE-15     | oesophagus                         | carcinoma                  |
| TE-161-T  | haematopoietic_and_lymphoid_tissue | lymphoid_neoplasm          |
| TE-441-T  | soft_tissue                        | rhabdomyosarcoma           |
| TE-5      | oesophagus                         | carcinoma                  |
| TE-6      | oesophagus                         | carcinoma                  |
| TE-8      | oesophagus                         | carcinoma                  |
| TE-9      | oesophagus                         | carcinoma                  |
| TGBC11TKB | stomach                            | carcinoma                  |
| TGBC1TKB  | biliary_tract                      | carcinoma                  |
| TGBC24TKB | biliary_tract                      | carcinoma                  |
| TGW       | autonomic_ganglia                  | neuroblastoma              |
| TI-73     | bone                               | osteosarcoma               |
| TK10      | kidney                             | carcinoma                  |
| TT        | thyroid                            | carcinoma                  |
| TUR       | haematopoietic_and_lymphoid_tissue | lymphoid_neoplasm          |
| TYK-nu    | ovary                              | carcinoma                  |
| U031      | kidney                             | carcinoma                  |
| U-118-MG  | central_nervous_system             | glioma                     |
| U-266     | haematopoietic_and_lymphoid_tissue | lymphoid_neoplasm          |
| U-2-OS    | bone                               | osteosarcoma               |
| U-698-M   | haematopoietic_and_lymphoid_tissue | lymphoid_neoplasm          |
| U-87-MG   | central_nervous_system             | glioma                     |
| UACC-257  | skin                               | malignant_melanoma         |
| UACC-62   | skin                               | malignant_melanoma         |
| UACC-812  | breast                             | carcinoma                  |
| UACC-893  | breast                             | carcinoma                  |
| UMC-11    | lung                               | carcinoid-endocrine_tumour |
| UM-UC-3   | urinary_tract                      | carcinoma                  |
| VA-ES-BJ  | soft_tissue                        | epithelioid_sarcoma        |

|           |                                    |                    |
|-----------|------------------------------------|--------------------|
| VM-CUB-1  | urinary_tract                      | carcinoma          |
| VMRC-LCP  | lung                               | carcinoma          |
| VMRC-MELG | skin                               | malignant_melanoma |
| VMRC-RCZ  | kidney                             | carcinoma          |
| WERI-Rb-1 | eye                                | retinoblastoma     |
| WM-115    | skin                               | malignant_melanoma |
| WSU-NHL   | haematopoietic_and_lymphoid_tissue | lymphoid_neoplasm  |
| YAPC      | pancreas                           | carcinoma          |
| YH-13     | central_nervous_system             | glioma             |
| YKG-1     | central_nervous_system             | glioma             |
| YT        | haematopoietic_and_lymphoid_tissue | lymphoid_neoplasm  |
| ZR-75-30  | breast                             | carcinoma          |

## Normal\_samples

| Sample  | Type                | Source              | Gender |
|---------|---------------------|---------------------|--------|
| NA06985 | Lymphoblastoid line | HapMap (Affymetrix) | Female |
| NA06991 | Lymphoblastoid line | HapMap (Affymetrix) | Female |
| NA06993 | Lymphoblastoid line | HapMap (Affymetrix) | Male   |
| NA06994 | Lymphoblastoid line | HapMap (Affymetrix) | Male   |
| NA07000 | Lymphoblastoid line | HapMap (Affymetrix) | Female |
| NA07019 | Lymphoblastoid line | HapMap (Affymetrix) | Female |
| NA07022 | Lymphoblastoid line | HapMap (Affymetrix) | Male   |
| NA07029 | Lymphoblastoid line | HapMap (Affymetrix) | Male   |
| NA07034 | Lymphoblastoid line | HapMap (Affymetrix) | Female |
| NA07048 | Lymphoblastoid line | HapMap (Affymetrix) | Male   |
| NA07055 | Lymphoblastoid line | HapMap (Affymetrix) | Female |
| NA07056 | Lymphoblastoid line | HapMap (Affymetrix) | Female |
| NA07345 | Lymphoblastoid line | HapMap (Affymetrix) | Male   |
| NA07348 | Lymphoblastoid line | HapMap (Affymetrix) | Female |
| NA07357 | Lymphoblastoid line | HapMap (Affymetrix) | Male   |
| NA10830 | Lymphoblastoid line | HapMap (Affymetrix) | Male   |
| NA10831 | Lymphoblastoid line | HapMap (Affymetrix) | Female |
| NA10835 | Lymphoblastoid line | HapMap (Affymetrix) | Male   |
| NA10838 | Lymphoblastoid line | HapMap (Affymetrix) | Male   |
| NA10839 | Lymphoblastoid line | HapMap (Affymetrix) | Female |
| NA10847 | Lymphoblastoid line | HapMap (Affymetrix) | Female |
| NA10851 | Lymphoblastoid line | HapMap (Affymetrix) | Male   |
| NA10854 | Lymphoblastoid line | HapMap (Affymetrix) | Female |
| NA10855 | Lymphoblastoid line | HapMap (Affymetrix) | Female |
| NA10856 | Lymphoblastoid line | HapMap (Affymetrix) | Male   |
| NA10857 | Lymphoblastoid line | HapMap (Affymetrix) | Male   |
| NA10859 | Lymphoblastoid line | HapMap (Affymetrix) | Female |
| NA10860 | Lymphoblastoid line | HapMap (Affymetrix) | Male   |
| NA10861 | Lymphoblastoid line | HapMap (Affymetrix) | Female |
| NA10863 | Lymphoblastoid line | HapMap (Affymetrix) | Female |
| NA11829 | Lymphoblastoid line | HapMap (Affymetrix) | Male   |
| NA11830 | Lymphoblastoid line | HapMap (Affymetrix) | Female |
| NA11831 | Lymphoblastoid line | HapMap (Affymetrix) | Male   |
| NA11832 | Lymphoblastoid line | HapMap (Affymetrix) | Female |
| NA11839 | Lymphoblastoid line | HapMap (Affymetrix) | Male   |
| NA11840 | Lymphoblastoid line | HapMap (Affymetrix) | Female |
| NA11881 | Lymphoblastoid line | HapMap (Affymetrix) | Male   |
| NA11882 | Lymphoblastoid line | HapMap (Affymetrix) | Female |
| NA11992 | Lymphoblastoid line | HapMap (Affymetrix) | Male   |
| NA11993 | Lymphoblastoid line | HapMap (Affymetrix) | Female |
| NA11994 | Lymphoblastoid line | HapMap (Affymetrix) | Male   |
| NA11995 | Lymphoblastoid line | HapMap (Affymetrix) | Female |







|             |                     |                       |        |
|-------------|---------------------|-----------------------|--------|
| NA19141     | Lymphoblastoid line | HapMap (Affymetrix)   | Male   |
| NA19142     | Lymphoblastoid line | HapMap (Affymetrix)   | Male   |
| NA19143     | Lymphoblastoid line | HapMap (Affymetrix)   | Female |
| NA19144     | Lymphoblastoid line | HapMap (Affymetrix)   | Male   |
| NA19145     | Lymphoblastoid line | HapMap (Affymetrix)   | Male   |
| NA19152     | Lymphoblastoid line | HapMap (Affymetrix)   | Female |
| NA19153     | Lymphoblastoid line | HapMap (Affymetrix)   | Male   |
| NA19154     | Lymphoblastoid line | HapMap (Affymetrix)   | Male   |
| NA19159     | Lymphoblastoid line | HapMap (Affymetrix)   | Female |
| NA19160     | Lymphoblastoid line | HapMap (Affymetrix)   | Male   |
| NA19161     | Lymphoblastoid line | HapMap (Affymetrix)   | Male   |
| NA19171     | Lymphoblastoid line | HapMap (Affymetrix)   | Male   |
| NA19172     | Lymphoblastoid line | HapMap (Affymetrix)   | Female |
| NA19173     | Lymphoblastoid line | HapMap (Affymetrix)   | Male   |
| NA19192     | Lymphoblastoid line | HapMap (Affymetrix)   | Male   |
| NA19193     | Lymphoblastoid line | HapMap (Affymetrix)   | Female |
| NA19194     | Lymphoblastoid line | HapMap (Affymetrix)   | Male   |
| NA19200     | Lymphoblastoid line | HapMap (Affymetrix)   | Male   |
| NA19201     | Lymphoblastoid line | HapMap (Affymetrix)   | Female |
| NA19202     | Lymphoblastoid line | HapMap (Affymetrix)   | Female |
| NA19203     | Lymphoblastoid line | HapMap (Affymetrix)   | Male   |
| NA19204     | Lymphoblastoid line | HapMap (Affymetrix)   | Female |
| NA19205     | Lymphoblastoid line | HapMap (Affymetrix)   | Male   |
| NA19206     | Lymphoblastoid line | HapMap (Affymetrix)   | Female |
| NA19207     | Lymphoblastoid line | HapMap (Affymetrix)   | Male   |
| NA19208     | Lymphoblastoid line | HapMap (Affymetrix)   | Male   |
| NA19209     | Lymphoblastoid line | HapMap (Affymetrix)   | Female |
| NA19210     | Lymphoblastoid line | HapMap (Affymetrix)   | Male   |
| NA19211     | Lymphoblastoid line | HapMap (Affymetrix)   | Male   |
| NA19221     | Lymphoblastoid line | HapMap (Affymetrix)   | Female |
| NA19222     | Lymphoblastoid line | HapMap (Affymetrix)   | Female |
| NA19223     | Lymphoblastoid line | HapMap (Affymetrix)   | Male   |
| NA19238     | Lymphoblastoid line | HapMap (Affymetrix)   | Female |
| NA19239     | Lymphoblastoid line | HapMap (Affymetrix)   | Male   |
| NA19240     | Lymphoblastoid line | HapMap (Affymetrix)   | Female |
| NCI-BL128   | Lymphoblastoid line | Transformed cell line | Male   |
| NCI-BL1395  | Lymphoblastoid line | Transformed cell line | Female |
| NCI-BL1437  | Lymphoblastoid line | Transformed cell line | Male   |
| NCI-BL1770  | Lymphoblastoid line | Transformed cell line | Male   |
| NCI-BL2009  | Lymphoblastoid line | Transformed cell line | Female |
| NCI-BL2052  | Lymphoblastoid line | Transformed cell line | Male   |
| NCI-BL2087  | Lymphoblastoid line | Transformed cell line | Male   |
| NCI-BL209   | Lymphoblastoid line | Transformed cell line | Male   |
| NCI-BL2122  | Lymphoblastoid line | Transformed cell line | Female |
| NCI-BL2126  | Lymphoblastoid line | Transformed cell line | Male   |
| NCI-BL2171  | Lymphoblastoid line | Transformed cell line | Male   |
| AC0887      | Primary             | Blood filter          | Female |
| AC0888      | Primary             | Blood filter          | Female |
| AC0889      | Primary             | Blood filter          | Female |
| AC0890      | Primary             | Blood filter          | Female |
| BB30-PBL    | Lymphoblastoid line | Transformed cell line | Female |
| BB49-EBV    | Lymphoblastoid line | Transformed cell line | Female |
| BB65-EBV    | Lymphoblastoid line | Transformed cell line | Male   |
| COLO-829-BL | Lymphoblastoid line | Transformed cell line | Male   |
| CP50-EBV    | Lymphoblastoid line | Transformed cell line | Male   |
| CP66-EBV    | Lymphoblastoid line | Transformed cell line | Male   |
| HA7-EBV     | Lymphoblastoid line | Transformed cell line | Male   |
| HCC1143-BL  | Lymphoblastoid line | Transformed cell line | Female |
| HCC1187-BL  | Lymphoblastoid line | Transformed cell line | Female |
| HCC1395-BL  | Lymphoblastoid line | Transformed cell line | Female |
| HCC1599-BL  | Lymphoblastoid line | Transformed cell line | Female |
| HCC1937-BL  | Lymphoblastoid line | Transformed cell line | Female |
| HCC1954-BL  | Lymphoblastoid line | Transformed cell line | Female |
| HCC2157-BL  | Lymphoblastoid line | Transformed cell line | Female |

|            |                     |                       |        |
|------------|---------------------|-----------------------|--------|
| HCC2218-BL | Lymphoblastoid line | Transformed cell line | Female |
| HCC38-BL   | Lymphoblastoid line | Transformed cell line | Female |
| J82-EBV    | Lymphoblastoid line | Transformed cell line | Male   |
| L542       | Lymphoblastoid line | Transformed cell line | Female |
| LB1047-EBV | Lymphoblastoid line | Transformed cell line | Female |
| LB2241-EBV | Lymphoblastoid line | Transformed cell line | Male   |
| LB373-EBV  | Lymphoblastoid line | Transformed cell line | Female |
| LB647-PBL  | Lymphoblastoid line | Transformed cell line | Male   |
| LB771-PBL  | Lymphoblastoid line | Transformed cell line | Male   |
| LB831-EBV  | Lymphoblastoid line | Transformed cell line | Male   |
| LB996-EBV  | Lymphoblastoid line | Transformed cell line | Male   |
| LS1034-PBL | Lymphoblastoid line | Transformed cell line | Male   |
| MZ1-B      | Lymphoblastoid line | Transformed cell line | Male   |
| MZ7-B      | Lymphoblastoid line | Transformed cell line | Female |
| LB2518-EBV | Lymphoblastoid line | Transformed cell line | Female |
| PD1579b    | Primary             | Normal renal tissue   | Female |
| PD1580b    | Primary             | Normal renal tissue   | Female |
| PD1582b    | Primary             | Normal renal tissue   | Female |
| PD1590b    | Primary             | Normal renal tissue   | Male   |
| PD1753b    | Primary             | Normal renal tissue   | Male   |
| PD1754b    | Primary             | Normal renal tissue   | Female |
| PD1759b    | Primary             | Normal renal tissue   | Male   |
| PD1764b    | Primary             | Normal renal tissue   | Male   |
| PD1766b    | Primary             | Normal renal tissue   | Female |
| PD1768b    | Primary             | Normal renal tissue   | Male   |
| PD1769b    | Primary             | Normal renal tissue   | Male   |
| PD2125b    | Primary             | Normal renal tissue   | Male   |
| PD2158b    | Primary             | Normal renal tissue   | Male   |
| PD2180b    | Primary             | Normal renal tissue   | Female |
| AC0922     | Primary             | Blood                 | Male   |
| AC0930     | Primary             | Blood                 | Male   |
| AC0938     | Primary             | Blood                 | Male   |
| AC0945     | Primary             | Blood                 | Male   |
| AC0946     | Primary             | Blood                 | Female |
| AC0953     | Primary             | Blood                 | Male   |
| AC0962     | Primary             | Blood                 | Male   |
| AC0292     | Lymphoblastoid line | Transformed cell line | Male   |
| AC0293     | Lymphoblastoid line | Transformed cell line | Male   |
| AC0294     | Lymphoblastoid line | Transformed cell line | Male   |
| AC0295     | Lymphoblastoid line | Transformed cell line | Male   |
| AC0296     | Lymphoblastoid line | Transformed cell line | Male   |
| AC0882     | Primary             | Blood filter          | Male   |
| AC0885     | Primary             | Blood filter          | Male   |
| AC0892     | Primary             | Blood filter          | Male   |
| AC0893     | Primary             | Blood filter          | Male   |
| AC0894     | Primary             | Blood filter          | Male   |
| AC0895     | Primary             | Blood filter          | Male   |
| PD2126b    | Primary             | Normal renal tissue   | Female |
| PD2127b    | Primary             | Normal renal tissue   | Female |
| PD2129b    | Primary             | Normal renal tissue   | Male   |
| PD2130b    | Primary             | Normal renal tissue   | Female |
| PD2131b    | Primary             | Normal renal tissue   | Female |
| PD2132b    | Primary             | Normal renal tissue   | Female |
| PD2134b    | Primary             | Normal renal tissue   | Female |
| PD2135b    | Primary             | Normal renal tissue   | Male   |
| PD2136b    | Primary             | Normal renal tissue   | Male   |
| PD2138b    | Primary             | Normal renal tissue   | Male   |
| PD2139b    | Primary             | Normal renal tissue   | Female |
| PD2140b    | Primary             | Normal renal tissue   | Male   |
| PD2145b    | Primary             | Normal renal tissue   | Male   |
| PD2141b    | Primary             | Normal renal tissue   | Female |
| PD2146b    | Primary             | Normal renal tissue   | Male   |
| PD2147b    | Primary             | Normal renal tissue   | Female |
| PD2148b    | Primary             | Normal renal tissue   | Female |

|         |         |                     |        |
|---------|---------|---------------------|--------|
| PD2149b | Primary | Normal renal tissue | Male   |
| PD2150b | Primary | Normal renal tissue | Male   |
| PD2152b | Primary | Normal renal tissue | Male   |
| PD2153b | Primary | Normal renal tissue | Male   |
| PD2154b | Primary | Normal renal tissue | Female |
| PD2155b | Primary | Normal renal tissue | Male   |
| PD2156b | Primary | Normal renal tissue | Male   |
| PD2157b | Primary | Normal renal tissue | Male   |
| PD2160b | Primary | Normal renal tissue | Male   |
| PD2161b | Primary | Normal renal tissue | Female |
| PD2162b | Primary | Normal renal tissue | Male   |
| PD2163b | Primary | Normal renal tissue | Male   |
| PD2164b | Primary | Normal renal tissue | Female |
| PD2166b | Primary | Normal renal tissue | Female |
| PD2167b | Primary | Normal renal tissue | Male   |
| PD2168b | Primary | Normal renal tissue | Male   |
| PD2170b | Primary | Normal renal tissue | Male   |
| PD2171b | Primary | Normal renal tissue | Female |
| PD2172b | Primary | Normal renal tissue | Male   |
| PD2173b | Primary | Normal renal tissue | Female |
| PD2174b | Primary | Normal renal tissue | Female |
| PD2175b | Primary | Normal renal tissue | Female |
| PD2176b | Primary | Normal renal tissue | Male   |
| PD2177b | Primary | Normal renal tissue | Male   |
| PD2178b | Primary | Normal renal tissue | Female |
| PD2181b | Primary | Normal renal tissue | Female |
| PD2182b | Primary | Normal renal tissue | Female |
| PD2213b | Primary | Normal renal tissue | Male   |
| PD2219b | Primary | Normal renal tissue | Male   |
| PD2183b | Primary | Normal renal tissue | Female |
| PD2184b | Primary | Normal renal tissue | Female |
| PD2185b | Primary | Normal renal tissue | Female |
| PD2186b | Primary | Normal renal tissue | Male   |
| PD2187b | Primary | Normal renal tissue | Female |
| PD2189b | Primary | Normal renal tissue | Male   |
| PD2190b | Primary | Normal renal tissue | Female |
| PD2191b | Primary | Normal renal tissue | Male   |
| PD2192b | Primary | Normal renal tissue | Male   |
| PD2193b | Primary | Normal renal tissue | Male   |
| PD2194b | Primary | Normal renal tissue | Male   |
| PD2198b | Primary | Normal renal tissue | Male   |
| PD2199b | Primary | Normal renal tissue | Male   |
| PD2221b | Primary | Normal renal tissue | Female |
| PD2202b | Primary | Normal renal tissue | Male   |
| PD2203b | Primary | Normal renal tissue | Female |
| PD2204b | Primary | Normal renal tissue | Male   |
| PD2205b | Primary | Normal renal tissue | Male   |
| PD2207b | Primary | Normal renal tissue | Male   |
| PD2208b | Primary | Normal renal tissue | Female |
| PD2209b | Primary | Normal renal tissue | Female |
| PD2210b | Primary | Normal renal tissue | Male   |
| PD2211b | Primary | Normal renal tissue | Female |
| PD2214b | Primary | Normal renal tissue | Male   |
| PD2215b | Primary | Normal renal tissue | Male   |
| PD2216b | Primary | Normal renal tissue | Male   |
| PD2217b | Primary | Normal renal tissue | Male   |
| PD2218b | Primary | Normal renal tissue | Male   |
| PD2222b | Primary | Normal renal tissue | Female |
| AC0907  | Primary | Blood               | Male   |
| AC0908  | Primary | Blood               | Male   |
| AC0915  | Primary | Blood               | Male   |
| AC0916  | Primary | Blood               | Male   |
| AC0923  | Primary | Blood               | Female |
| AC0924  | Primary | Blood               | Male   |

|        |         |       |        |
|--------|---------|-------|--------|
| AC0931 | Primary | Blood | Female |
| AC0932 | Primary | Blood | Male   |
| AC0939 | Primary | Blood | Male   |
| AC0940 | Primary | Blood | Male   |
| AC0948 | Primary | Blood | Male   |
| AC0955 | Primary | Blood | Male   |
| AC0956 | Primary | Blood | Female |
| AC0963 | Primary | Blood | Male   |
| AC0964 | Primary | Blood | Female |
| AC0909 | Primary | Blood | Female |
| AC0910 | Primary | Blood | Male   |
| AC0911 | Primary | Blood | Male   |
| AC0917 | Primary | Blood | Female |
| AC0918 | Primary | Blood | Male   |
| AC0919 | Primary | Blood | Male   |
| AC0925 | Primary | Blood | Male   |
| AC0926 | Primary | Blood | Female |
| AC0933 | Primary | Blood | Female |
| AC0934 | Primary | Blood | Male   |
| AC0941 | Primary | Blood | Female |
| AC0942 | Primary | Blood | Female |
| AC0949 | Primary | Blood | Male   |
| AC0950 | Primary | Blood | Female |
| AC0957 | Primary | Blood | Male   |
| AC0958 | Primary | Blood | Female |
| AC0912 | Primary | Blood | Male   |
| AC0913 | Primary | Blood | Male   |
| AC0920 | Primary | Blood | Male   |
| AC0921 | Primary | Blood | Male   |
| AC0927 | Primary | Blood | Male   |
| AC0928 | Primary | Blood | Male   |
| AC0929 | Primary | Blood | Female |
| AC0935 | Primary | Blood | Male   |
| AC0936 | Primary | Blood | Male   |
| AC0937 | Primary | Blood | Male   |
| AC0943 | Primary | Blood | Male   |
| AC0944 | Primary | Blood | Male   |
| AC0951 | Primary | Blood | Male   |
| AC0952 | Primary | Blood | Female |
| AC0959 | Primary | Blood | Male   |

**Supplementary Table 2.** Tissue breakdown for different mutation classes for the whole genome and individual gene loci.

For each table under 'SNP6 Analysis' are the number of homozygous and hemizygous deletions, amplifications (>10) and breakpoints determined from the copy number analysis using the Affymetrix SNP6 array. Somatic hemizygous deletion counts are given for whole chromosome loss (Chr), chromosome arm loss (Arm), large hemizygous deletion (>1Mb) and small hemizygous deletions (<1Mb) together with somatic homozygous deletions detected using the Affymetrix SNP6 array. Under 'Known Cancer Gene Screen' are the number of somatic point mutations and homozygous deletions (HDs) (determined using the Affymetrix array and by multiplex PCR) per tissue type. The point mutations have been classified as likely oncogenic mutations (LOM) and tentative oncogenic variants (TOV). Likely oncogenic mutations are sequence changes that have previously been shown to be somatic mutations in human cancer and/or those consistent with the position and type of mutations for a given gene. This class includes homozygous and compound heterozygous inactivating mutations in tumour suppressor genes. Tentative oncogenic variants (TOV) are inactivating mutations present as heterozygous variants in tumour suppressor genes other than missense mutations in *TP53* and *FBXW7* which are included in the LOM class. This work is ongoing.

Data is presented for the whole genome together with each of 45 known cancer genes (labelled KCG) (excluding the X linked gene *UTX*), 15 genes present within well mapped common fragile sites (labelled FRA) (listed in Supplementary Table 1) and the two genes present in unexplained deletion clusters (labelled unexplained) that have been sequenced across the 746 cancer cell lines. Counts of amplifications, hemizygous deletions and homozygous deletions are made if any such feature overlaps either partially or completely with the gene. 'ND' has been inserted where the data is unavailable.

## Whole Genome

| Cancer Cell lines                  |     | Somatic hemizygous deletions |             |           |           | Somatic HDs | Somatic Amplifications | Breakpoints   | Known Cancer Gene Screen |                     |          |
|------------------------------------|-----|------------------------------|-------------|-----------|-----------|-------------|------------------------|---------------|--------------------------|---------------------|----------|
| Tissue                             | Nº  | <1Mb                         | >1Mb        | Arm       | Chr       |             |                        |               | Point Mutations LOM      | Point Mutations TOV | HDs      |
| adrenal_gland                      | 2   | 40 (20)                      | 37 (18.5)   | 14 (7)    | 4 (2)     | 15 (7.5)    | 7 (3.5)                | 518 (259)     | 2 (1)                    | 0 (0)               | 1 (0.5)  |
| autonomic_ganglia                  | 36  | 502 (13.9)                   | 521 (14.5)  | 28 (0.8)  | 25 (0.7)  | 66 (1.8)    | 100 (2.8)              | 4445 (123.5)  | 23 (0.6)                 | 0 (0)               | 6 (0.2)  |
| biliary_tract                      | 6   | 73 (12.2)                    | 107 (17.8)  | 32 (5.3)  | 16 (2.7)  | 21 (3.5)    | 1 (0.2)                | 898 (149.7)   | 12 (2)                   | 0 (0)               | 3 (0.5)  |
| bone                               | 32  | 481 (15)                     | 664 (20.8)  | 36 (1.1)  | 36 (1.1)  | 102 (3.2)   | 76 (2.4)               | 5682 (177.6)  | 24 (0.8)                 | 1 (0)               | 15 (0.5) |
| breast                             | 42  | 685 (16.3)                   | 1145 (27.3) | 128 (3)   | 53 (1.3)  | 181 (4.3)   | 209 (5)                | 10500 (250)   | 65 (1.5)                 | 13 (0.3)            | 24 (0.6) |
| central_nervous_system             | 55  | 901 (16.4)                   | 903 (16.4)  | 81 (1.5)  | 108 (2)   | 154 (2.8)   | 47 (0.9)               | 8651 (157.3)  | 72 (1.3)                 | 5 (0.1)             | 53 (1)   |
| cervix                             | 11  | 103 (9.4)                    | 181 (16.5)  | 45 (4.1)  | 15 (1.4)  | 18 (1.6)    | 4 (0.4)                | 1670 (151.8)  | 7 (0.6)                  | 0 (0)               | 2 (0.2)  |
| endometrium                        | 9   | 133 (14.8)                   | 125 (13.9)  | 8 (0.9)   | 3 (0.3)   | 25 (2.8)    | 7 (0.8)                | 1429 (158.8)  | 27 (3)                   | 6 (0.7)             | 2 (0.2)  |
| eye                                | 1   | 12 (12)                      | 19 (19)     | 1 (1)     | 0 (0)     | 1 (1)       | 0 (0)                  | 145 (145)     | 1 (1)                    | 0 (0)               | 1 (1)    |
| gastrointestinal_tract             | 1   | 49 (49)                      | 28 (28)     | 7 (7)     | 4 (4)     | 1 (1)       | 0 (0)                  | 985 (985)     | 3 (3)                    | 0 (0)               | 0 (0)    |
| haematopoietic_and_lymphoid_tissue | 124 | 1265 (10.2)                  | 1641 (13.2) | 99 (0.8)  | 51 (0.4)  | 230 (1.9)   | 57 (0.5)               | 12028 (97)    | 160 (1.3)                | 19 (0.2)            | 60 (0.5) |
| kidney                             | 20  | 217 (10.9)                   | 290 (14.5)  | 50 (2.5)  | 52 (2.6)  | 60 (3)      | 4 (0.2)                | 2375 (118.8)  | 23 (1.2)                 | 1 (0.1)             | 17 (0.9) |
| large_intestine                    | 36  | 648 (18)                     | 560 (15.6)  | 60 (1.7)  | 50 (1.4)  | 169 (4.7)   | 55 (1.5)               | 5469 (151.9)  | 111 (3.1)                | 35 (1)              | 9 (0.3)  |
| liver                              | 8   | 111 (13.9)                   | 139 (17.4)  | 21 (2.6)  | 9 (1.1)   | 30 (3.8)    | 3 (0.4)                | 1099 (137.4)  | 12 (1.5)                 | 1 (0.1)             | 4 (0.5)  |
| lung                               | 145 | 1929 (13.3)                  | 2987 (20.6) | 535 (3.7) | 282 (1.9) | 468 (3.2)   | 316 (2.2)              | 26074 (179.8) | 278 (1.9)                | 14 (0.1)            | 54 (0.4) |
| oesophagus                         | 21  | 374 (17.8)                   | 564 (26.9)  | 76 (3.6)  | 43 (2)    | 138 (6.6)   | 57 (2.7)               | 5479 (260.9)  | 28 (1.3)                 | 1 (0)               | 19 (0.9) |
| ovary                              | 22  | 382 (17.4)                   | 440 (20)    | 44 (2)    | 30 (1.4)  | 83 (3.8)    | 30 (1.4)               | 4479 (203.6)  | 28 (1.3)                 | 11 (0.5)            | 8 (0.4)  |
| pancreas                           | 17  | 245 (14.4)                   | 387 (22.8)  | 44 (2.6)  | 37 (2.2)  | 89 (5.2)    | 15 (0.9)               | 2677 (157.5)  | 37 (2.2)                 | 2 (0.1)             | 19 (1.1) |
| placenta                           | 2   | 59 (29.5)                    | 23 (11.5)   | 1 (0.5)   | 1 (0.5)   | 6 (3)       | 8 (4)                  | 666 (333)     | 0 (0)                    | 0 (0)               | 0 (0)    |
| pleura                             | 5   | 78 (15.6)                    | 98 (19.6)   | 14 (2.8)  | 7 (1.4)   | 37 (7.4)    | 0 (0)                  | 782 (156.4)   | 2 (0.4)                  | 0 (0)               | 4 (0.8)  |
| prostate                           | 5   | 74 (14.8)                    | 135 (27)    | 4 (0.8)   | 1 (0.2)   | 10 (2)      | 29 (5.8)               | 790 (158)     | 9 (1.8)                  | 5 (1)               | 2 (0.4)  |
| skin                               | 51  | 729 (14.3)                   | 861 (16.9)  | 86 (1.7)  | 67 (1.3)  | 118 (2.3)   | 34 (0.7)               | 7377 (144.6)  | 81 (1.6)                 | 6 (0.1)             | 33 (0.6) |
| small_intestine                    | 1   | 8 (8)                        | 10 (10)     | 0 (0)     | 0 (0)     | 5 (5)       | 0 (0)                  | 59 (59)       | 1 (1)                    | 0 (0)               | 0 (0)    |
| soft_tissue                        | 19  | 248 (13.1)                   | 249 (13.1)  | 30 (1.6)  | 32 (1.7)  | 47 (2.5)    | 23 (1.2)               | 2693 (141.7)  | 25 (1.3)                 | 2 (0.1)             | 8 (0.4)  |
| stomach                            | 21  | 456 (21.7)                   | 483 (23)    | 55 (2.6)  | 38 (1.8)  | 164 (7.8)   | 47 (2.2)               | 4965 (236.4)  | 36 (1.7)                 | 5 (0.2)             | 9 (0.4)  |
| testis                             | 3   | 67 (22.3)                    | 63 (21)     | 11 (3.7)  | 4 (1.3)   | 6 (2)       | 0 (0)                  | 695 (231.7)   | 2 (0.7)                  | 1 (0.3)             | 0 (0)    |
| thyroid                            | 11  | 153 (13.9)                   | 214 (19.5)  | 30 (2.7)  | 32 (2.9)  | 35 (3.2)    | 25 (2.3)               | 1999 (181.7)  | 23 (2.1)                 | 1 (0.1)             | 5 (0.5)  |
| Unknown                            | 1   | 5 (5)                        | 6 (6)       | 2 (2)     | 0 (0)     | 3 (3)       | 1 (1)                  | 57 (57)       | 3 (3)                    | 0 (0)               | 1 (1)    |
| upper_aerodigestive_tract          | 20  | 266 (13.3)                   | 381 (19.1)  | 87 (4.4)  | 15 (0.8)  | 98 (4.9)    | 25 (1.3)               | 3413 (170.7)  | 35 (1.8)                 | 3 (0.2)             | 5 (0.3)  |
| urinary_tract                      | 16  | 255 (15.9)                   | 284 (17.8)  | 45 (2.8)  | 17 (1.1)  | 43 (2.7)    | 15 (0.9)               | 2812 (175.8)  | 32 (2)                   | 4 (0.3)             | 12 (0.8) |
| vulva                              | 3   | 21 (7)                       | 66 (22)     | 7 (2.3)   | 0 (0)     | 5 (1.7)     | 3 (1)                  | 385 (128.3)   | 4 (1.3)                  | 0 (0)               | 1 (0.3)  |

## APC (KCG)

| Cancer Cell lines                  |     | Somatic hemizygous deletions |          |          |         | Somatic HDs | Somatic Amplifications | Breakpoints | Known Cancer Gene Screen |                     |       |
|------------------------------------|-----|------------------------------|----------|----------|---------|-------------|------------------------|-------------|--------------------------|---------------------|-------|
| Tissue                             | №   | <1Mb                         | >1Mb     | Arm      | Chr     |             |                        |             | Point Mutations LOM      | Point Mutations TOV | HDs   |
| adrenal_gland                      | 2   | 0 (0)                        | 0 (0)    | 0 (0)    | 0 (0)   | 0 (0)       | 0 (0)                  | 0 (0)       | 0 (0)                    | 0 (0)               | 0 (0) |
| autonomic_ganglia                  | 36  | 0 (0)                        | 2 (0.1)  | 1 (0)    | 1 (0)   | 0 (0)       | 0 (0)                  | 0 (0)       | 0 (0)                    | 0 (0)               | 0 (0) |
| biliary_tract                      | 6   | 0 (0)                        | 1 (0.2)  | 3 (0.5)  | 0 (0)   | 0 (0)       | 0 (0)                  | 0 (0)       | 1 (0.2)                  | 0 (0)               | 0 (0) |
| bone                               | 32  | 0 (0)                        | 3 (0.1)  | 0 (0)    | 1 (0)   | 0 (0)       | 0 (0)                  | 1 (0)       | 0 (0)                    | 0 (0)               | 0 (0) |
| breast                             | 42  | 0 (0)                        | 6 (0.1)  | 3 (0.1)  | 0 (0)   | 0 (0)       | 0 (0)                  | 0 (0)       | 1 (0)                    | 0 (0)               | 0 (0) |
| central_nervous_system             | 55  | 0 (0)                        | 3 (0.1)  | 0 (0)    | 0 (0)   | 0 (0)       | 0 (0)                  | 0 (0)       | 0 (0)                    | 0 (0)               | 0 (0) |
| cervix                             | 11  | 0 (0)                        | 0 (0)    | 2 (0.2)  | 0 (0)   | 0 (0)       | 0 (0)                  | 0 (0)       | 0 (0)                    | 0 (0)               | 0 (0) |
| endometrium                        | 9   | 0 (0)                        | 0 (0)    | 0 (0)    | 0 (0)   | 0 (0)       | 0 (0)                  | 0 (0)       | 0 (0)                    | 0 (0)               | 0 (0) |
| eye                                | 1   | 0 (0)                        | 0 (0)    | 0 (0)    | 0 (0)   | 0 (0)       | 0 (0)                  | 0 (0)       | 0 (0)                    | 0 (0)               | 0 (0) |
| gastrointestinal_tract             | 1   | 0 (0)                        | 0 (0)    | 1 (1)    | 0 (0)   | 0 (0)       | 0 (0)                  | 0 (0)       | 0 (0)                    | 0 (0)               | 0 (0) |
| haematopoietic_and_lymphoid_tissue | 124 | 1 (0)                        | 7 (0.1)  | 0 (0)    | 0 (0)   | 0 (0)       | 0 (0)                  | 1 (0)       | 0 (0)                    | 0 (0)               | 0 (0) |
| kidney                             | 20  | 0 (0)                        | 1 (0.1)  | 0 (0)    | 1 (0.1) | 0 (0)       | 0 (0)                  | 0 (0)       | 0 (0)                    | 0 (0)               | 0 (0) |
| large_intestine                    | 36  | 0 (0)                        | 5 (0.1)  | 0 (0)    | 2 (0.1) | 0 (0)       | 0 (0)                  | 2 (0.1)     | 23 (0.6)                 | 2 (0.1)             | 0 (0) |
| liver                              | 8   | 0 (0)                        | 1 (0.1)  | 0 (0)    | 0 (0)   | 0 (0)       | 0 (0)                  | 0 (0)       | 0 (0)                    | 0 (0)               | 0 (0) |
| lung                               | 145 | 0 (0)                        | 20 (0.1) | 29 (0.2) | 1 (0)   | 0 (0)       | 0 (0)                  | 0 (0)       | 2 (0)                    | 2 (0)               | 0 (0) |
| oesophagus                         | 21  | 0 (0)                        | 3 (0.1)  | 2 (0.1)  | 0 (0)   | 0 (0)       | 0 (0)                  | 0 (0)       | 0 (0)                    | 0 (0)               | 0 (0) |
| ovary                              | 22  | 0 (0)                        | 4 (0.2)  | 1 (0)    | 1 (0)   | 0 (0)       | 0 (0)                  | 0 (0)       | 1 (0)                    | 1 (0)               | 0 (0) |
| pancreas                           | 17  | 0 (0)                        | 3 (0.2)  | 0 (0)    | 1 (0.1) | 0 (0)       | 0 (0)                  | 0 (0)       | 0 (0)                    | 0 (0)               | 0 (0) |
| placenta                           | 2   | 0 (0)                        | 0 (0)    | 0 (0)    | 0 (0)   | 0 (0)       | 0 (0)                  | 0 (0)       | 0 (0)                    | 0 (0)               | 0 (0) |
| pleura                             | 5   | 0 (0)                        | 1 (0.2)  | 0 (0)    | 0 (0)   | 0 (0)       | 0 (0)                  | 0 (0)       | 0 (0)                    | 0 (0)               | 0 (0) |
| prostate                           | 5   | 1 (0.2)                      | 0 (0)    | 0 (0)    | 0 (0)   | 0 (0)       | 0 (0)                  | 0 (0)       | 0 (0)                    | 0 (0)               | 0 (0) |
| skin                               | 51  | 0 (0)                        | 3 (0.1)  | 5 (0.1)  | 1 (0)   | 0 (0)       | 0 (0)                  | 0 (0)       | 0 (0)                    | 1 (0)               | 0 (0) |
| small_intestine                    | 1   | 0 (0)                        | 0 (0)    | 0 (0)    | 0 (0)   | 0 (0)       | 0 (0)                  | 0 (0)       | 0 (0)                    | 0 (0)               | 0 (0) |
| soft_tissue                        | 19  | 1 (0.1)                      | 1 (0.1)  | 1 (0.1)  | 1 (0.1) | 0 (0)       | 0 (0)                  | 0 (0)       | 1 (0.1)                  | 0 (0)               | 0 (0) |
| stomach                            | 21  | 1 (0)                        | 3 (0.1)  | 0 (0)    | 2 (0.1) | 0 (0)       | 0 (0)                  | 1 (0)       | 4 (0.2)                  | 0 (0)               | 0 (0) |
| testis                             | 3   | 0 (0)                        | 1 (0.3)  | 0 (0)    | 0 (0)   | 0 (0)       | 0 (0)                  | 0 (0)       | 0 (0)                    | 0 (0)               | 0 (0) |
| thyroid                            | 11  | 0 (0)                        | 0 (0)    | 0 (0)    | 1 (0.1) | 0 (0)       | 0 (0)                  | 0 (0)       | 0 (0)                    | 0 (0)               | 0 (0) |
| not specified                      | 1   | 0 (0)                        | 0 (0)    | 0 (0)    | 0 (0)   | 0 (0)       | 0 (0)                  | 0 (0)       | 0 (0)                    | 0 (0)               | 0 (0) |
| upper_aerodigestive_tract          | 20  | 0 (0)                        | 4 (0.2)  | 4 (0.2)  | 0 (0)   | 0 (0)       | 0 (0)                  | 0 (0)       | 0 (0)                    | 1 (0.1)             | 0 (0) |
| urinary_tract                      | 16  | 0 (0)                        | 1 (0.1)  | 2 (0.1)  | 0 (0)   | 0 (0)       | 0 (0)                  | 0 (0)       | 0 (0)                    | 0 (0)               | 0 (0) |
| vulva                              | 3   | 0 (0)                        | 0 (0)    | 0 (0)    | 0 (0)   | 0 (0)       | 0 (0)                  | 0 (0)       | 0 (0)                    | 0 (0)               | 0 (0) |

## BHD (KCG)

| Cancer Cell lines                  |     | Somatic hemizygous deletions |          |          |          | Somatic HDs | Somatic Amplifications | Breakpoints | Known Cancer Gene Screen |                     |       |
|------------------------------------|-----|------------------------------|----------|----------|----------|-------------|------------------------|-------------|--------------------------|---------------------|-------|
| Tissue                             | №   | <1Mb                         | >1Mb     | Arm      | Chr      |             |                        |             | Point Mutations LOM      | Point Mutations TOV | HDs   |
| adrenal_gland                      | 2   | 0 (0)                        | 0 (0)    | 0 (0)    | 1 (0.5)  | 0 (0)       | 0 (0)                  | 0 (0)       | 0 (0)                    | 0 (0)               | 0 (0) |
| autonomic_ganglia                  | 36  | 0 (0)                        | 7 (0.2)  | 3 (0.1)  | 1 (0)    | 0 (0)       | 0 (0)                  | 0 (0)       | 0 (0)                    | 0 (0)               | 0 (0) |
| biliary_tract                      | 6   | 0 (0)                        | 1 (0.2)  | 3 (0.5)  | 0 (0)    | 0 (0)       | 0 (0)                  | 0 (0)       | 0 (0)                    | 0 (0)               | 0 (0) |
| bone                               | 32  | 0 (0)                        | 5 (0.2)  | 1 (0)    | 5 (0.2)  | 0 (0)       | 0 (0)                  | 0 (0)       | 0 (0)                    | 0 (0)               | 0 (0) |
| breast                             | 42  | 0 (0)                        | 8 (0.2)  | 8 (0.2)  | 8 (0.2)  | 0 (0)       | 0 (0)                  | 0 (0)       | 0 (0)                    | 0 (0)               | 0 (0) |
| central_nervous_system             | 55  | 0 (0)                        | 13 (0.2) | 2 (0)    | 9 (0.2)  | 0 (0)       | 0 (0)                  | 0 (0)       | 0 (0)                    | 0 (0)               | 0 (0) |
| cervix                             | 11  | 0 (0)                        | 1 (0.1)  | 0 (0)    | 1 (0.1)  | 0 (0)       | 0 (0)                  | 1 (0.1)     | 0 (0)                    | 0 (0)               | 0 (0) |
| endometrium                        | 9   | 0 (0)                        | 0 (0)    | 1 (0.1)  | 0 (0)    | 0 (0)       | 0 (0)                  | 0 (0)       | 0 (0)                    | 0 (0)               | 0 (0) |
| eye                                | 1   | 0 (0)                        | 0 (0)    | 0 (0)    | 0 (0)    | 0 (0)       | 0 (0)                  | 0 (0)       | 0 (0)                    | 0 (0)               | 0 (0) |
| gastrointestinal_tract             | 1   | 0 (0)                        | 0 (0)    | 0 (0)    | 0 (0)    | 0 (0)       | 0 (0)                  | 0 (0)       | 0 (0)                    | 0 (0)               | 0 (0) |
| haematopoietic_and_lymphoid_tissue | 124 | 0 (0)                        | 14 (0.1) | 13 (0.1) | 3 (0)    | 0 (0)       | 0 (0)                  | 0 (0)       | 1 (0)                    | 2 (0)               | 0 (0) |
| kidney                             | 20  | 0 (0)                        | 1 (0.1)  | 3 (0.2)  | 3 (0.2)  | 0 (0)       | 0 (0)                  | 0 (0)       | 0 (0)                    | 0 (0)               | 0 (0) |
| large_intestine                    | 36  | 1 (0)                        | 6 (0.2)  | 8 (0.2)  | 4 (0.1)  | 0 (0)       | 0 (0)                  | 0 (0)       | 0 (0)                    | 3 (0.1)             | 0 (0) |
| liver                              | 8   | 0 (0)                        | 2 (0.3)  | 1 (0.1)  | 0 (0)    | 0 (0)       | 0 (0)                  | 0 (0)       | 0 (0)                    | 0 (0)               | 0 (0) |
| lung                               | 145 | 0 (0)                        | 20 (0.1) | 54 (0.4) | 15 (0.1) | 0 (0)       | 0 (0)                  | 0 (0)       | 0 (0)                    | 0 (0)               | 0 (0) |
| oesophagus                         | 21  | 0 (0)                        | 5 (0.2)  | 2 (0.1)  | 4 (0.2)  | 0 (0)       | 0 (0)                  | 0 (0)       | 0 (0)                    | 0 (0)               | 0 (0) |
| ovary                              | 22  | 0 (0)                        | 3 (0.1)  | 1 (0)    | 5 (0.2)  | 0 (0)       | 0 (0)                  | 0 (0)       | 0 (0)                    | 2 (0.1)             | 0 (0) |
| pancreas                           | 17  | 0 (0)                        | 3 (0.2)  | 6 (0.4)  | 1 (0.1)  | 0 (0)       | 0 (0)                  | 0 (0)       | 0 (0)                    | 1 (0.1)             | 0 (0) |
| placenta                           | 2   | 0 (0)                        | 0 (0)    | 0 (0)    | 0 (0)    | 0 (0)       | 0 (0)                  | 0 (0)       | 0 (0)                    | 0 (0)               | 0 (0) |
| pleura                             | 5   | 0 (0)                        | 0 (0)    | 0 (0)    | 1 (0.2)  | 0 (0)       | 0 (0)                  | 0 (0)       | 0 (0)                    | 0 (0)               | 0 (0) |
| prostate                           | 5   | 0 (0)                        | 0 (0)    | 0 (0)    | 0 (0)    | 0 (0)       | 0 (0)                  | 0 (0)       | 0 (0)                    | 1 (0.2)             | 0 (0) |
| skin                               | 51  | 0 (0)                        | 7 (0.1)  | 6 (0.1)  | 3 (0.1)  | 0 (0)       | 0 (0)                  | 0 (0)       | 0 (0)                    | 0 (0)               | 0 (0) |
| small_intestine                    | 1   | 0 (0)                        | 0 (0)    | 0 (0)    | 0 (0)    | 0 (0)       | 0 (0)                  | 0 (0)       | 0 (0)                    | 0 (0)               | 0 (0) |
| soft_tissue                        | 19  | 0 (0)                        | 0 (0)    | 3 (0.2)  | 2 (0.1)  | 0 (0)       | 0 (0)                  | 0 (0)       | 0 (0)                    | 1 (0.1)             | 0 (0) |
| stomach                            | 21  | 0 (0)                        | 4 (0.2)  | 4 (0.2)  | 2 (0.1)  | 0 (0)       | 1 (0)                  | 0 (0)       | 0 (0)                    | 1 (0)               | 0 (0) |
| testis                             | 3   | 0 (0)                        | 1 (0.3)  | 0 (0)    | 0 (0)    | 0 (0)       | 0 (0)                  | 0 (0)       | 0 (0)                    | 0 (0)               | 0 (0) |
| thyroid                            | 11  | 0 (0)                        | 0 (0)    | 3 (0.3)  | 4 (0.4)  | 0 (0)       | 0 (0)                  | 0 (0)       | 1 (0.1)                  | 0 (0)               | 0 (0) |
| not specified                      | 1   | 0 (0)                        | 0 (0)    | 0 (0)    | 0 (0)    | 0 (0)       | 0 (0)                  | 0 (0)       | 0 (0)                    | 0 (0)               | 0 (0) |
| upper_aerodigestive_tract          | 20  | 0 (0)                        | 3 (0.2)  | 5 (0.3)  | 1 (0.1)  | 0 (0)       | 0 (0)                  | 0 (0)       | 0 (0)                    | 1 (0.1)             | 0 (0) |
| urinary_tract                      | 16  | 0 (0)                        | 2 (0.1)  | 3 (0.2)  | 0 (0)    | 0 (0)       | 0 (0)                  | 0 (0)       | 0 (0)                    | 0 (0)               | 0 (0) |
| vulva                              | 3   | 0 (0)                        | 1 (0.3)  | 0 (0)    | 0 (0)    | 0 (0)       | 0 (0)                  | 0 (0)       | 0 (0)                    | 0 (0)               | 0 (0) |

BRAF (KCG)

| Cancer Cell lines                  |     | Somatic hemizygous deletions |         |         |         | Somatic HDs | Somatic Amplifications | Breakpoints | Known Cancer Gene Screen |                     |       |
|------------------------------------|-----|------------------------------|---------|---------|---------|-------------|------------------------|-------------|--------------------------|---------------------|-------|
| Tissue                             | №   | <1Mb                         | >1Mb    | Arm     | Chr     |             |                        |             | Point Mutations LOM      | Point Mutations TOV | HDs   |
| adrenal_gland                      | 2   | 0 (0)                        | 0 (0)   | 0 (0)   | 0 (0)   | 0 (0)       | 0 (0)                  | 0 (0)       | 0 (0)                    | 0 (0)               | 0 (0) |
| autonomic_ganglia                  | 36  | 0 (0)                        | 2 (0.1) | 0 (0)   | 0 (0)   | 0 (0)       | 0 (0)                  | 0 (0)       | 1 (0)                    | 0 (0)               | 0 (0) |
| biliary_tract                      | 6   | 0 (0)                        | 0 (0)   | 0 (0)   | 0 (0)   | 0 (0)       | 0 (0)                  | 0 (0)       | 0 (0)                    | 0 (0)               | 0 (0) |
| bone                               | 32  | 0 (0)                        | 1 (0)   | 0 (0)   | 0 (0)   | 0 (0)       | 0 (0)                  | 0 (0)       | 0 (0)                    | 0 (0)               | 0 (0) |
| breast                             | 42  | 0 (0)                        | 7 (0.2) | 0 (0)   | 0 (0)   | 0 (0)       | 0 (0)                  | 2 (0)       | 3 (0.1)                  | 0 (0)               | 0 (0) |
| central_nervous_system             | 55  | 1 (0)                        | 4 (0.1) | 0 (0)   | 3 (0.1) | 0 (0)       | 0 (0)                  | 1 (0)       | 3 (0.1)                  | 0 (0)               | 0 (0) |
| cervix                             | 11  | 0 (0)                        | 1 (0.1) | 1 (0.1) | 0 (0)   | 0 (0)       | 0 (0)                  | 0 (0)       | 0 (0)                    | 0 (0)               | 0 (0) |
| endometrium                        | 9   | 0 (0)                        | 2 (0.2) | 0 (0)   | 0 (0)   | 0 (0)       | 0 (0)                  | 0 (0)       | 0 (0)                    | 0 (0)               | 0 (0) |
| eye                                | 1   | 0 (0)                        | 0 (0)   | 0 (0)   | 0 (0)   | 0 (0)       | 0 (0)                  | 0 (0)       | 0 (0)                    | 0 (0)               | 0 (0) |
| gastrointestinal_tract             | 1   | 0 (0)                        | 0 (0)   | 0 (0)   | 0 (0)   | 0 (0)       | 0 (0)                  | 0 (0)       | 0 (0)                    | 0 (0)               | 0 (0) |
| haematopoietic_and_lymphoid_tissue | 124 | 0 (0)                        | 7 (0.1) | 0 (0)   | 1 (0)   | 0 (0)       | 0 (0)                  | 0 (0)       | 3 (0)                    | 0 (0)               | 0 (0) |
| kidney                             | 20  | 1 (0.1)                      | 0 (0)   | 0 (0)   | 0 (0)   | 0 (0)       | 0 (0)                  | 0 (0)       | 0 (0)                    | 0 (0)               | 0 (0) |
| large_intestine                    | 36  | 0 (0)                        | 0 (0)   | 0 (0)   | 0 (0)   | 0 (0)       | 0 (0)                  | 0 (0)       | 7 (0.2)                  | 0 (0)               | 0 (0) |
| liver                              | 8   | 0 (0)                        | 0 (0)   | 0 (0)   | 0 (0)   | 0 (0)       | 0 (0)                  | 0 (0)       | 1 (0.1)                  | 0 (0)               | 0 (0) |
| lung                               | 145 | 0 (0)                        | 8 (0.1) | 0 (0)   | 4 (0)   | 0 (0)       | 0 (0)                  | 2 (0)       | 6 (0)                    | 0 (0)               | 0 (0) |
| oesophagus                         | 21  | 0 (0)                        | 2 (0.1) | 1 (0)   | 1 (0)   | 0 (0)       | 0 (0)                  | 0 (0)       | 0 (0)                    | 0 (0)               | 0 (0) |
| ovary                              | 22  | 0 (0)                        | 0 (0)   | 0 (0)   | 0 (0)   | 0 (0)       | 0 (0)                  | 0 (0)       | 0 (0)                    | 0 (0)               | 0 (0) |
| pancreas                           | 17  | 0 (0)                        | 1 (0.1) | 0 (0)   | 0 (0)   | 0 (0)       | 0 (0)                  | 0 (0)       | 0 (0)                    | 0 (0)               | 0 (0) |
| placenta                           | 2   | 0 (0)                        | 0 (0)   | 0 (0)   | 0 (0)   | 0 (0)       | 0 (0)                  | 0 (0)       | 0 (0)                    | 0 (0)               | 0 (0) |
| pleura                             | 5   | 0 (0)                        | 0 (0)   | 0 (0)   | 1 (0.2) | 0 (0)       | 0 (0)                  | 0 (0)       | 0 (0)                    | 0 (0)               | 0 (0) |
| prostate                           | 5   | 0 (0)                        | 1 (0.2) | 0 (0)   | 0 (0)   | 0 (0)       | 0 (0)                  | 0 (0)       | 0 (0)                    | 0 (0)               | 0 (0) |
| skin                               | 51  | 1 (0)                        | 5 (0.1) | 0 (0)   | 0 (0)   | 0 (0)       | 0 (0)                  | 4 (0.1)     | 31 (0.6)                 | 0 (0)               | 0 (0) |
| small_intestine                    | 1   | 0 (0)                        | 0 (0)   | 0 (0)   | 0 (0)   | 0 (0)       | 0 (0)                  | 0 (0)       | 0 (0)                    | 0 (0)               | 0 (0) |
| soft_tissue                        | 19  | 0 (0)                        | 0 (0)   | 0 (0)   | 1 (0.1) | 0 (0)       | 0 (0)                  | 0 (0)       | 4 (0.2)                  | 0 (0)               | 0 (0) |
| stomach                            | 21  | 0 (0)                        | 3 (0.1) | 0 (0)   | 0 (0)   | 0 (0)       | 0 (0)                  | 1 (0)       | 0 (0)                    | 0 (0)               | 0 (0) |
| testis                             | 3   | 0 (0)                        | 0 (0)   | 0 (0)   | 0 (0)   | 0 (0)       | 0 (0)                  | 0 (0)       | 0 (0)                    | 0 (0)               | 0 (0) |
| thyroid                            | 11  | 0 (0)                        | 1 (0.1) | 0 (0)   | 0 (0)   | 0 (0)       | 0 (0)                  | 0 (0)       | 6 (0.5)                  | 0 (0)               | 0 (0) |
| not specified                      | 1   | 0 (0)                        | 0 (0)   | 0 (0)   | 0 (0)   | 0 (0)       | 0 (0)                  | 0 (0)       | 0 (0)                    | 0 (0)               | 0 (0) |
| upper_aerodigestive_tract          | 20  | 0 (0)                        | 1 (0.1) | 1 (0.1) | 0 (0)   | 0 (0)       | 0 (0)                  | 0 (0)       | 0 (0)                    | 0 (0)               | 0 (0) |
| urinary_tract                      | 16  | 0 (0)                        | 0 (0)   | 0 (0)   | 0 (0)   | 0 (0)       | 0 (0)                  | 0 (0)       | 0 (0)                    | 0 (0)               | 0 (0) |
| vulva                              | 3   | 0 (0)                        | 0 (0)   | 0 (0)   | 0 (0)   | 0 (0)       | 0 (0)                  | 0 (0)       | 0 (0)                    | 0 (0)               | 0 (0) |

BRCA1 (KCG)

| Cancer Cell lines                  |     | Somatic hemizygous deletions |          |         |          | Somatic HDs | Somatic Amplifications | Breakpoints | Known Cancer Gene Screen |                     |       |
|------------------------------------|-----|------------------------------|----------|---------|----------|-------------|------------------------|-------------|--------------------------|---------------------|-------|
| Tissue                             | №   | <1Mb                         | >1Mb     | Arm     | Chr      |             |                        |             | Point Mutations LOM      | Point Mutations TOV | HDs   |
| adrenal_gland                      | 2   | 0 (0)                        | 0 (0)    | 0 (0)   | 1 (0.5)  | 0 (0)       | 0 (0)                  | 0 (0)       | 0 (0)                    | 0 (0)               | 0 (0) |
| autonomic_ganglia                  | 36  | 0 (0)                        | 0 (0)    | 0 (0)   | 1 (0)    | 0 (0)       | 0 (0)                  | 1 (0)       | 0 (0)                    | 0 (0)               | 0 (0) |
| biliary_tract                      | 6   | 0 (0)                        | 2 (0.3)  | 0 (0)   | 0 (0)    | 0 (0)       | 0 (0)                  | 0 (0)       | 0 (0)                    | 0 (0)               | 0 (0) |
| bone                               | 32  | 0 (0)                        | 5 (0.2)  | 0 (0)   | 5 (0.2)  | 0 (0)       | 0 (0)                  | 0 (0)       | 0 (0)                    | 0 (0)               | 0 (0) |
| breast                             | 42  | 0 (0)                        | 13 (0.3) | 2 (0)   | 8 (0.2)  | 0 (0)       | 0 (0)                  | 0 (0)       | 0 (0)                    | 0 (0)               | 0 (0) |
| central_nervous_system             | 55  | 0 (0)                        | 6 (0.1)  | 0 (0)   | 9 (0.2)  | 0 (0)       | 0 (0)                  | 1 (0)       | 0 (0)                    | 0 (0)               | 0 (0) |
| cervix                             | 11  | 0 (0)                        | 1 (0.1)  | 1 (0.1) | 1 (0.1)  | 0 (0)       | 0 (0)                  | 0 (0)       | 0 (0)                    | 0 (0)               | 0 (0) |
| endometrium                        | 9   | 0 (0)                        | 1 (0.1)  | 0 (0)   | 0 (0)    | 0 (0)       | 0 (0)                  | 0 (0)       | 0 (0)                    | 0 (0)               | 0 (0) |
| eye                                | 1   | 0 (0)                        | 0 (0)    | 0 (0)   | 0 (0)    | 0 (0)       | 0 (0)                  | 0 (0)       | 0 (0)                    | 0 (0)               | 0 (0) |
| gastrointestinal_tract             | 1   | 0 (0)                        | 1 (1)    | 0 (0)   | 0 (0)    | 0 (0)       | 0 (0)                  | 0 (0)       | 0 (0)                    | 0 (0)               | 0 (0) |
| haematopoietic_and_lymphoid_tissue | 124 | 0 (0)                        | 5 (0)    | 0 (0)   | 3 (0)    | 0 (0)       | 0 (0)                  | 0 (0)       | 0 (0)                    | 0 (0)               | 0 (0) |
| kidney                             | 20  | 0 (0)                        | 0 (0)    | 0 (0)   | 3 (0.2)  | 0 (0)       | 0 (0)                  | 0 (0)       | 0 (0)                    | 0 (0)               | 0 (0) |
| large_intestine                    | 36  | 0 (0)                        | 2 (0.1)  | 0 (0)   | 4 (0.1)  | 0 (0)       | 0 (0)                  | 0 (0)       | 0 (0)                    | 0 (0)               | 0 (0) |
| liver                              | 8   | 0 (0)                        | 2 (0.3)  | 0 (0)   | 0 (0)    | 0 (0)       | 0 (0)                  | 1 (0.1)     | 0 (0)                    | 0 (0)               | 0 (0) |
| lung                               | 145 | 0 (0)                        | 10 (0.1) | 0 (0)   | 15 (0.1) | 0 (0)       | 0 (0)                  | 0 (0)       | 0 (0)                    | 0 (0)               | 0 (0) |
| oesophagus                         | 21  | 0 (0)                        | 6 (0.3)  | 0 (0)   | 4 (0.2)  | 0 (0)       | 0 (0)                  | 0 (0)       | 0 (0)                    | 0 (0)               | 0 (0) |
| ovary                              | 22  | 0 (0)                        | 2 (0.1)  | 0 (0)   | 5 (0.2)  | 0 (0)       | 0 (0)                  | 0 (0)       | 0 (0)                    | 1 (0)               | 0 (0) |
| pancreas                           | 17  | 0 (0)                        | 0 (0)    | 0 (0)   | 1 (0.1)  | 0 (0)       | 0 (0)                  | 0 (0)       | 0 (0)                    | 0 (0)               | 0 (0) |
| placenta                           | 2   | 0 (0)                        | 0 (0)    | 0 (0)   | 0 (0)    | 0 (0)       | 0 (0)                  | 0 (0)       | 0 (0)                    | 0 (0)               | 0 (0) |
| pleura                             | 5   | 0 (0)                        | 0 (0)    | 0 (0)   | 1 (0.2)  | 0 (0)       | 0 (0)                  | 0 (0)       | 0 (0)                    | 0 (0)               | 0 (0) |
| prostate                           | 5   | 0 (0)                        | 0 (0)    | 0 (0)   | 0 (0)    | 0 (0)       | 0 (0)                  | 0 (0)       | 0 (0)                    | 0 (0)               | 0 (0) |
| skin                               | 51  | 0 (0)                        | 2 (0)    | 0 (0)   | 3 (0.1)  | 0 (0)       | 0 (0)                  | 0 (0)       | 0 (0)                    | 0 (0)               | 0 (0) |
| small_intestine                    | 1   | 0 (0)                        | 0 (0)    | 0 (0)   | 0 (0)    | 0 (0)       | 0 (0)                  | 0 (0)       | 0 (0)                    | 0 (0)               | 0 (0) |
| soft_tissue                        | 19  | 0 (0)                        | 1 (0.1)  | 0 (0)   | 2 (0.1)  | 0 (0)       | 0 (0)                  | 1 (0.1)     | 0 (0)                    | 0 (0)               | 0 (0) |
| stomach                            | 21  | 0 (0)                        | 2 (0.1)  | 0 (0)   | 2 (0.1)  | 0 (0)       | 0 (0)                  | 1 (0)       | 0 (0)                    | 0 (0)               | 0 (0) |
| testis                             | 3   | 0 (0)                        | 1 (0.3)  | 0 (0)   | 0 (0)    | 0 (0)       | 0 (0)                  | 0 (0)       | 0 (0)                    | 0 (0)               | 0 (0) |
| thyroid                            | 11  | 0 (0)                        | 1 (0.1)  | 0 (0)   | 4 (0.4)  | 0 (0)       | 0 (0)                  | 0 (0)       | 0 (0)                    | 0 (0)               | 0 (0) |
| not specified                      | 1   | 0 (0)                        | 0 (0)    | 0 (0)   | 0 (0)    | 0 (0)       | 0 (0)                  | 0 (0)       | 0 (0)                    | 0 (0)               | 0 (0) |
| upper_aerodigestive_tract          | 20  | 0 (0)                        | 4 (0.2)  | 1 (0.1) | 1 (0.1)  | 0 (0)       | 0 (0)                  | 2 (0.1)     | 0 (0)                    | 0 (0)               | 0 (0) |
| urinary_tract                      | 16  | 0 (0)                        | 1 (0.1)  | 0 (0)   | 0 (0)    | 0 (0)       | 0 (0)                  | 0 (0)       | 0 (0)                    | 0 (0)               | 0 (0) |
| vulva                              | 3   | 0 (0)                        | 0 (0)    | 0 (0)   | 0 (0)    | 0 (0)       | 0 (0)                  | 0 (0)       | 0 (0)                    | 0 (0)               | 0 (0) |

BRCA2 (KCG)

| Cancer Cell lines                  |     | Somatic hemizygous deletions |          |          |       | Somatic HDs | Somatic Amplifications | Breakpoints | Known Cancer Gene Screen |                     |       |
|------------------------------------|-----|------------------------------|----------|----------|-------|-------------|------------------------|-------------|--------------------------|---------------------|-------|
| Tissue                             | №   | <1Mb                         | >1Mb     | Arm      | Chr   |             |                        |             | Point Mutations LOM      | Point Mutations TOV | HDs   |
| adrenal_gland                      | 2   | 0 (0)                        | 0 (0)    | 0 (0)    | 0 (0) | 0 (0)       | 0 (0)                  | 0 (0)       | 0 (0)                    | 0 (0)               | 0 (0) |
| autonomic_ganglia                  | 36  | 0 (0)                        | 1 (0)    | 3 (0.1)  | 0 (0) | 0 (0)       | 0 (0)                  | 0 (0)       | 0 (0)                    | 0 (0)               | 0 (0) |
| biliary_tract                      | 6   | 0 (0)                        | 1 (0.2)  | 0 (0)    | 0 (0) | 0 (0)       | 0 (0)                  | 0 (0)       | 0 (0)                    | 0 (0)               | 0 (0) |
| bone                               | 32  | 0 (0)                        | 2 (0.1)  | 5 (0.2)  | 0 (0) | 0 (0)       | 0 (0)                  | 0 (0)       | 0 (0)                    | 0 (0)               | 0 (0) |
| breast                             | 42  | 0 (0)                        | 6 (0.1)  | 11 (0.3) | 0 (0) | 0 (0)       | 0 (0)                  | 0 (0)       | 1 (0)                    | 5 (0.1)             | 0 (0) |
| central_nervous_system             | 55  | 0 (0)                        | 8 (0.1)  | 13 (0.2) | 0 (0) | 0 (0)       | 0 (0)                  | 0 (0)       | 0 (0)                    | 0 (0)               | 0 (0) |
| cervix                             | 11  | 0 (0)                        | 0 (0)    | 3 (0.3)  | 0 (0) | 0 (0)       | 0 (0)                  | 0 (0)       | 1 (0.1)                  | 0 (0)               | 0 (0) |
| endometrium                        | 9   | 1 (0.1)                      | 0 (0)    | 1 (0.1)  | 0 (0) | 0 (0)       | 0 (0)                  | 0 (0)       | 1 (0.1)                  | 0 (0)               | 0 (0) |
| eye                                | 1   | 0 (0)                        | 0 (0)    | 0 (0)    | 0 (0) | 0 (0)       | 0 (0)                  | 0 (0)       | 0 (0)                    | 0 (0)               | 0 (0) |
| gastrointestinal_tract             | 1   | 0 (0)                        | 0 (0)    | 1 (1)    | 0 (0) | 0 (0)       | 0 (0)                  | 0 (0)       | 0 (0)                    | 0 (0)               | 0 (0) |
| haematopoietic_and_lymphoid_tissue | 124 | 1 (0)                        | 5 (0)    | 7 (0.1)  | 0 (0) | 0 (0)       | 0 (0)                  | 0 (0)       | 0 (0)                    | 4 (0)               | 0 (0) |
| kidney                             | 20  | 0 (0)                        | 0 (0)    | 4 (0.2)  | 0 (0) | 0 (0)       | 0 (0)                  | 0 (0)       | 0 (0)                    | 0 (0)               | 0 (0) |
| large_intestine                    | 36  | 1 (0)                        | 1 (0)    | 4 (0.1)  | 0 (0) | 0 (0)       | 1 (0)                  | 1 (0)       | 2 (0.1)                  | 6 (0.2)             | 0 (0) |
| liver                              | 8   | 0 (0)                        | 1 (0.1)  | 1 (0.1)  | 0 (0) | 0 (0)       | 0 (0)                  | 0 (0)       | 0 (0)                    | 0 (0)               | 0 (0) |
| lung                               | 145 | 0 (0)                        | 32 (0.2) | 49 (0.3) | 0 (0) | 0 (0)       | 0 (0)                  | 0 (0)       | 0 (0)                    | 2 (0)               | 0 (0) |
| oesophagus                         | 21  | 0 (0)                        | 3 (0.1)  | 6 (0.3)  | 0 (0) | 0 (0)       | 0 (0)                  | 0 (0)       | 0 (0)                    | 0 (0)               | 0 (0) |
| ovary                              | 22  | 0 (0)                        | 1 (0)    | 6 (0.3)  | 0 (0) | 0 (0)       | 0 (0)                  | 0 (0)       | 0 (0)                    | 1 (0)               | 0 (0) |
| pancreas                           | 17  | 0 (0)                        | 1 (0.1)  | 4 (0.2)  | 0 (0) | 0 (0)       | 0 (0)                  | 0 (0)       | 1 (0.1)                  | 0 (0)               | 0 (0) |
| placenta                           | 2   | 0 (0)                        | 0 (0)    | 1 (0.5)  | 0 (0) | 0 (0)       | 0 (0)                  | 0 (0)       | 0 (0)                    | 0 (0)               | 0 (0) |
| pleura                             | 5   | 0 (0)                        | 1 (0.2)  | 0 (0)    | 0 (0) | 0 (0)       | 0 (0)                  | 0 (0)       | 0 (0)                    | 0 (0)               | 0 (0) |
| prostate                           | 5   | 0 (0)                        | 0 (0)    | 0 (0)    | 0 (0) | 0 (0)       | 0 (0)                  | 0 (0)       | 0 (0)                    | 1 (0.2)             | 0 (0) |
| skin                               | 51  | 0 (0)                        | 2 (0)    | 1 (0)    | 0 (0) | 0 (0)       | 0 (0)                  | 0 (0)       | 0 (0)                    | 0 (0)               | 0 (0) |
| small_intestine                    | 1   | 0 (0)                        | 0 (0)    | 0 (0)    | 0 (0) | 0 (0)       | 0 (0)                  | 0 (0)       | 0 (0)                    | 0 (0)               | 0 (0) |
| soft_tissue                        | 19  | 0 (0)                        | 2 (0.1)  | 4 (0.2)  | 0 (0) | 0 (0)       | 0 (0)                  | 0 (0)       | 0 (0)                    | 0 (0)               | 0 (0) |
| stomach                            | 21  | 0 (0)                        | 1 (0)    | 3 (0.1)  | 0 (0) | 0 (0)       | 0 (0)                  | 0 (0)       | 0 (0)                    | 1 (0)               | 0 (0) |
| testis                             | 3   | 0 (0)                        | 0 (0)    | 2 (0.7)  | 0 (0) | 0 (0)       | 0 (0)                  | 0 (0)       | 0 (0)                    | 0 (0)               | 0 (0) |
| thyroid                            | 11  | 0 (0)                        | 1 (0.1)  | 5 (0.5)  | 0 (0) | 0 (0)       | 0 (0)                  | 0 (0)       | 0 (0)                    | 0 (0)               | 0 (0) |
| not specified                      | 1   | 0 (0)                        | 0 (0)    | 0 (0)    | 0 (0) | 0 (0)       | 0 (0)                  | 0 (0)       | 0 (0)                    | 0 (0)               | 0 (0) |
| upper_aerodigestive_tract          | 20  | 0 (0)                        | 2 (0.1)  | 4 (0.2)  | 0 (0) | 0 (0)       | 0 (0)                  | 0 (0)       | 0 (0)                    | 0 (0)               | 0 (0) |
| urinary_tract                      | 16  | 0 (0)                        | 2 (0.1)  | 1 (0.1)  | 0 (0) | 0 (0)       | 0 (0)                  | 0 (0)       | 0 (0)                    | 0 (0)               | 0 (0) |
| vulva                              | 3   | 0 (0)                        | 0 (0)    | 0 (0)    | 0 (0) | 0 (0)       | 0 (0)                  | 0 (0)       | 0 (0)                    | 0 (0)               | 0 (0) |

CDH1 (KCG)

| Cancer Cell lines                  |     | Somatic hemizygous deletions |          |          |          | Somatic HDs | Somatic Amplifications | Breakpoints | Known Cancer Gene Screen |                     |         |
|------------------------------------|-----|------------------------------|----------|----------|----------|-------------|------------------------|-------------|--------------------------|---------------------|---------|
| Tissue                             | №   | <1Mb                         | >1Mb     | Arm      | Chr      |             |                        |             | Point Mutations LOM      | Point Mutations TOV | HDs     |
| adrenal_gland                      | 2   | 0 (0)                        | 1 (0.5)  | 1 (0.5)  | 0 (0)    | 0 (0)       | 0 (0)                  | 0 (0)       | 0 (0)                    | 0 (0)               | 0 (0)   |
| autonomic_ganglia                  | 36  | 0 (0)                        | 2 (0.1)  | 0 (0)    | 0 (0)    | 0 (0)       | 0 (0)                  | 0 (0)       | 0 (0)                    | 0 (0)               | 0 (0)   |
| biliary_tract                      | 6   | 0 (0)                        | 0 (0)    | 1 (0.2)  | 0 (0)    | 0 (0)       | 0 (0)                  | 0 (0)       | 0 (0)                    | 0 (0)               | 0 (0)   |
| bone                               | 32  | 0 (0)                        | 5 (0.2)  | 2 (0.1)  | 1 (0)    | 0 (0)       | 0 (0)                  | 0 (0)       | 0 (0)                    | 0 (0)               | 0 (0)   |
| breast                             | 42  | 0 (0)                        | 9 (0.2)  | 4 (0.1)  | 1 (0)    | 2 (0)       | 0 (0)                  | 2 (0)       | 4 (0.1)                  | 0 (0)               | 3 (0.1) |
| central_nervous_system             | 55  | 0 (0)                        | 5 (0.1)  | 0 (0)    | 0 (0)    | 0 (0)       | 0 (0)                  | 1 (0)       | 0 (0)                    | 0 (0)               | 0 (0)   |
| cervix                             | 11  | 0 (0)                        | 0 (0)    | 0 (0)    | 0 (0)    | 0 (0)       | 0 (0)                  | 1 (0.1)     | 0 (0)                    | 0 (0)               | 0 (0)   |
| endometrium                        | 9   | 0 (0)                        | 1 (0.1)  | 1 (0.1)  | 0 (0)    | 0 (0)       | 0 (0)                  | 1 (0.1)     | 0 (0)                    | 0 (0)               | 0 (0)   |
| eye                                | 1   | 0 (0)                        | 0 (0)    | 0 (0)    | 0 (0)    | 0 (0)       | 0 (0)                  | 0 (0)       | 0 (0)                    | 0 (0)               | 0 (0)   |
| gastrointestinal_tract             | 1   | 0 (0)                        | 0 (0)    | 0 (0)    | 0 (0)    | 0 (0)       | 0 (0)                  | 1 (1)       | 0 (0)                    | 0 (0)               | 0 (0)   |
| haematopoietic_and_lymphoid_tissue | 124 | 0 (0)                        | 7 (0.1)  | 4 (0)    | 2 (0)    | 0 (0)       | 0 (0)                  | 0 (0)       | 0 (0)                    | 1 (0)               | 0 (0)   |
| kidney                             | 20  | 0 (0)                        | 1 (0.1)  | 0 (0)    | 3 (0.2)  | 0 (0)       | 0 (0)                  | 0 (0)       | 0 (0)                    | 0 (0)               | 0 (0)   |
| large_intestine                    | 36  | 1 (0)                        | 2 (0.1)  | 0 (0)    | 0 (0)    | 0 (0)       | 0 (0)                  | 1 (0)       | 0 (0)                    | 3 (0.1)             | 0 (0)   |
| liver                              | 8   | 0 (0)                        | 2 (0.3)  | 1 (0.1)  | 2 (0.3)  | 0 (0)       | 0 (0)                  | 0 (0)       | 0 (0)                    | 0 (0)               | 0 (0)   |
| lung                               | 145 | 0 (0)                        | 32 (0.2) | 10 (0.1) | 11 (0.1) | 0 (0)       | 0 (0)                  | 0 (0)       | 1 (0)                    | 0 (0)               | 0 (0)   |
| oesophagus                         | 21  | 0 (0)                        | 0 (0)    | 0 (0)    | 2 (0.1)  | 0 (0)       | 0 (0)                  | 1 (0)       | 0 (0)                    | 0 (0)               | 0 (0)   |
| ovary                              | 22  | 0 (0)                        | 3 (0.1)  | 1 (0)    | 2 (0.1)  | 0 (0)       | 0 (0)                  | 0 (0)       | 0 (0)                    | 0 (0)               | 0 (0)   |
| pancreas                           | 17  | 0 (0)                        | 2 (0.1)  | 0 (0)    | 1 (0.1)  | 0 (0)       | 0 (0)                  | 0 (0)       | 0 (0)                    | 0 (0)               | 0 (0)   |
| placenta                           | 2   | 0 (0)                        | 0 (0)    | 0 (0)    | 0 (0)    | 0 (0)       | 0 (0)                  | 0 (0)       | 0 (0)                    | 0 (0)               | 0 (0)   |
| pleura                             | 5   | 0 (0)                        | 0 (0)    | 0 (0)    | 0 (0)    | 0 (0)       | 0 (0)                  | 0 (0)       | 0 (0)                    | 0 (0)               | 0 (0)   |
| prostate                           | 5   | 0 (0)                        | 0 (0)    | 0 (0)    | 1 (0.2)  | 0 (0)       | 0 (0)                  | 0 (0)       | 0 (0)                    | 1 (0.2)             | 0 (0)   |
| skin                               | 51  | 0 (0)                        | 9 (0.2)  | 0 (0)    | 0 (0)    | 0 (0)       | 0 (0)                  | 0 (0)       | 0 (0)                    | 1 (0)               | 0 (0)   |
| small_intestine                    | 1   | 0 (0)                        | 0 (0)    | 0 (0)    | 0 (0)    | 0 (0)       | 0 (0)                  | 0 (0)       | 0 (0)                    | 0 (0)               | 0 (0)   |
| soft_tissue                        | 19  | 0 (0)                        | 1 (0.1)  | 0 (0)    | 0 (0)    | 0 (0)       | 0 (0)                  | 0 (0)       | 0 (0)                    | 0 (0)               | 0 (0)   |
| stomach                            | 21  | 1 (0)                        | 2 (0.1)  | 0 (0)    | 1 (0)    | 0 (0)       | 0 (0)                  | 0 (0)       | 3 (0.1)                  | 0 (0)               | 0 (0)   |
| testis                             | 3   | 0 (0)                        | 0 (0)    | 0 (0)    | 1 (0.3)  | 0 (0)       | 0 (0)                  | 0 (0)       | 0 (0)                    | 0 (0)               | 0 (0)   |
| thyroid                            | 11  | 0 (0)                        | 1 (0.1)  | 1 (0.1)  | 1 (0.1)  | 0 (0)       | 0 (0)                  | 0 (0)       | 0 (0)                    | 0 (0)               | 0 (0)   |
| not specified                      | 1   | 0 (0)                        | 0 (0)    | 0 (0)    | 0 (0)    | 0 (0)       | 0 (0)                  | 0 (0)       | 0 (0)                    | 0 (0)               | 0 (0)   |
| upper_aerodigestive_tract          | 20  | 0 (0)                        | 1 (0.1)  | 2 (0.1)  | 0 (0)    | 0 (0)       | 0 (0)                  | 0 (0)       | 0 (0)                    | 0 (0)               | 0 (0)   |
| urinary_tract                      | 16  | 0 (0)                        | 1 (0.1)  | 1 (0.1)  | 1 (0.1)  | 0 (0)       | 0 (0)                  | 0 (0)       | 0 (0)                    | 0 (0)               | 0 (0)   |
| vulva                              | 3   | 0 (0)                        | 0 (0)    | 0 (0)    | 0 (0)    | 0 (0)       | 0 (0)                  | 0 (0)       | 0 (0)                    | 0 (0)               | 0 (0)   |

CDKN2A (KCG)

| Cancer Cell lines                  |     | Somatic hemizygous deletions |          |         |          | Somatic HDs | Somatic Amplifications | Breakpoints | Known Cancer Gene Screen |                     |          |
|------------------------------------|-----|------------------------------|----------|---------|----------|-------------|------------------------|-------------|--------------------------|---------------------|----------|
| Tissue                             | №   | <1Mb                         | >1Mb     | Arm     | Chr      |             |                        |             | Point Mutations LOM      | Point Mutations TOV | HDs      |
| adrenal_gland                      | 2   | 0 (0)                        | 1 (0.5)  | 1 (0.5) | 0 (0)    | 0 (0)       | 0 (0)                  | 0 (0)       | 0 (0)                    | 0 (0)               | 0 (0)    |
| autonomic_ganglia                  | 36  | 0 (0)                        | 6 (0.2)  | 0 (0)   | 0 (0)    | 1 (0)       | 0 (0)                  | 0 (0)       | 0 (0)                    | 0 (0)               | 1 (0)    |
| biliary_tract                      | 6   | 0 (0)                        | 0 (0)    | 1 (0.2) | 2 (0.3)  | 2 (0.3)     | 0 (0)                  | 0 (0)       | 0 (0)                    | 0 (0)               | 2 (0.3)  |
| bone                               | 32  | 1 (0)                        | 7 (0.2)  | 0 (0)   | 0 (0)    | 8 (0.3)     | 0 (0)                  | 0 (0)       | 1 (0)                    | 0 (0)               | 9 (0.3)  |
| breast                             | 42  | 0 (0)                        | 7 (0.2)  | 1 (0)   | 3 (0.1)  | 6 (0.1)     | 0 (0)                  | 2 (0)       | 2 (0)                    | 0 (0)               | 8 (0.2)  |
| central_nervous_system             | 55  | 0 (0)                        | 6 (0.1)  | 2 (0)   | 0 (0)    | 30 (0.5)    | 0 (0)                  | 4 (0.1)     | 1 (0)                    | 0 (0)               | 35 (0.6) |
| cervix                             | 11  | 0 (0)                        | 1 (0.1)  | 3 (0.3) | 1 (0.1)  | 0 (0)       | 0 (0)                  | 0 (0)       | 0 (0)                    | 0 (0)               | 0 (0)    |
| endometrium                        | 9   | 1 (0.1)                      | 0 (0)    | 0 (0)   | 1 (0.1)  | 0 (0)       | 0 (0)                  | 1 (0.1)     | 0 (0)                    | 0 (0)               | 0 (0)    |
| eye                                | 1   | 0 (0)                        | 0 (0)    | 0 (0)   | 0 (0)    | 0 (0)       | 0 (0)                  | 0 (0)       | 0 (0)                    | 0 (0)               | 0 (0)    |
| gastrointestinal_tract             | 1   | 0 (0)                        | 1 (1)    | 0 (0)   | 0 (0)    | 0 (0)       | 0 (0)                  | 0 (0)       | 0 (0)                    | 0 (0)               | 0 (0)    |
| haematopoietic_and_lymphoid_tissue | 124 | 0 (0)                        | 11 (0.1) | 2 (0)   | 1 (0)    | 36 (0.3)    | 0 (0)                  | 7 (0.1)     | 3 (0)                    | 1 (0)               | 39 (0.3) |
| kidney                             | 20  | 0 (0)                        | 0 (0)    | 2 (0.1) | 2 (0.1)  | 10 (0.5)    | 0 (0)                  | 6 (0.3)     | 0 (0)                    | 0 (0)               | 15 (0.8) |
| large_intestine                    | 36  | 2 (0.1)                      | 6 (0.2)  | 3 (0.1) | 2 (0.1)  | 3 (0.1)     | 0 (0)                  | 0 (0)       | 1 (0)                    | 0 (0)               | 3 (0.1)  |
| liver                              | 8   | 0 (0)                        | 0 (0)    | 0 (0)   | 0 (0)    | 3 (0.4)     | 0 (0)                  | 0 (0)       | 1 (0.1)                  | 0 (0)               | 3 (0.4)  |
| lung                               | 145 | 0 (0)                        | 10 (0.1) | 9 (0.1) | 19 (0.1) | 23 (0.2)    | 0 (0)                  | 2 (0)       | 12 (0.1)                 | 0 (0)               | 33 (0.2) |
| oesophagus                         | 21  | 0 (0)                        | 0 (0)    | 0 (0)   | 3 (0.1)  | 11 (0.5)    | 0 (0)                  | 2 (0.1)     | 0 (0)                    | 0 (0)               | 14 (0.7) |
| ovary                              | 22  | 0 (0)                        | 1 (0)    | 2 (0.1) | 2 (0.1)  | 4 (0.2)     | 0 (0)                  | 0 (0)       | 0 (0)                    | 0 (0)               | 5 (0.2)  |
| pancreas                           | 17  | 0 (0)                        | 2 (0.1)  | 1 (0.1) | 3 (0.2)  | 10 (0.6)    | 0 (0)                  | 1 (0.1)     | 3 (0.2)                  | 0 (0)               | 11 (0.6) |
| placenta                           | 2   | 0 (0)                        | 0 (0)    | 0 (0)   | 0 (0)    | 0 (0)       | 0 (0)                  | 0 (0)       | 0 (0)                    | 0 (0)               | 0 (0)    |
| pleura                             | 5   | 0 (0)                        | 0 (0)    | 0 (0)   | 0 (0)    | 3 (0.6)     | 0 (0)                  | 1 (0.2)     | 0 (0)                    | 0 (0)               | 4 (0.8)  |
| prostate                           | 5   | 0 (0)                        | 1 (0.2)  | 1 (0.2) | 0 (0)    | 0 (0)       | 0 (0)                  | 0 (0)       | 1 (0.2)                  | 0 (0)               | 0 (0)    |
| skin                               | 51  | 1 (0)                        | 8 (0.2)  | 8 (0.2) | 2 (0)    | 18 (0.4)    | 0 (0)                  | 5 (0.1)     | 12 (0.2)                 | 0 (0)               | 23 (0.5) |
| small_intestine                    | 1   | 0 (0)                        | 0 (0)    | 0 (0)   | 0 (0)    | 0 (0)       | 0 (0)                  | 0 (0)       | 0 (0)                    | 0 (0)               | 7 (7)    |
| soft_tissue                        | 19  | 0 (0)                        | 1 (0.1)  | 1 (0.1) | 2 (0.1)  | 7 (0.4)     | 0 (0)                  | 0 (0)       | 2 (0.1)                  | 0 (0)               | 0 (0)    |
| stomach                            | 21  | 0 (0)                        | 2 (0.1)  | 4 (0.2) | 0 (0)    | 3 (0.1)     | 0 (0)                  | 0 (0)       | 1 (0)                    | 0 (0)               | 3 (0.1)  |
| testis                             | 3   | 0 (0)                        | 0 (0)    | 0 (0)   | 1 (0.3)  | 0 (0)       | 0 (0)                  | 0 (0)       | 0 (0)                    | 0 (0)               | 0 (0)    |
| thyroid                            | 11  | 1 (0.1)                      | 0 (0)    | 0 (0)   | 2 (0.2)  | 4 (0.4)     | 0 (0)                  | 0 (0)       | 1 (0.1)                  | 1 (0.1)             | 5 (0.5)  |
| not specified                      | 1   | 0 (0)                        | 1 (1)    | 0 (0)   | 0 (0)    | 0 (0)       | 0 (0)                  | 0 (0)       | 0 (0)                    | 0 (0)               | 0 (0)    |
| upper_aerodigestive_tract          | 20  | 1 (0.1)                      | 3 (0.2)  | 3 (0.2) | 3 (0.2)  | 2 (0.1)     | 0 (0)                  | 2 (0.1)     | 10 (0.5)                 | 0 (0)               | 4 (0.2)  |
| urinary_tract                      | 16  | 0 (0)                        | 1 (0.1)  | 0 (0)   | 1 (0.1)  | 6 (0.4)     | 0 (0)                  | 0 (0)       | 1 (0.1)                  | 1 (0.1)             | 7 (0.4)  |
| vulva                              | 3   | 0 (0)                        | 1 (0.3)  | 0 (0)   | 0 (0)    | 1 (0.3)     | 0 (0)                  | 0 (0)       | 0 (0)                    | 0 (0)               | 1 (0.3)  |

CTNNB1 (KCG)

| Cancer Cell lines                  |     | Somatic hemizygous deletions |          |          |         | Somatic HDs | Somatic Amplifications | Breakpoints | Known Cancer Gene Screen |                     |       |
|------------------------------------|-----|------------------------------|----------|----------|---------|-------------|------------------------|-------------|--------------------------|---------------------|-------|
| Tissue                             | №   | <1Mb                         | >1Mb     | Arm      | Chr     |             |                        |             | Point Mutations LOM      | Point Mutations TOV | HDs   |
| adrenal_gland                      | 2   | 0 (0)                        | 0 (0)    | 0 (0)    | 0 (0)   | 0 (0)       | 0 (0)                  | 0 (0)       | 1 (0.5)                  | 0 (0)               | 0 (0) |
| autonomic_ganglia                  | 36  | 0 (0)                        | 9 (0.3)  | 3 (0.1)  | 0 (0)   | 0 (0)       | 0 (0)                  | 0 (0)       | 0 (0)                    | 0 (0)               | 0 (0) |
| biliary_tract                      | 6   | 0 (0)                        | 0 (0)    | 1 (0.2)  | 0 (0)   | 0 (0)       | 0 (0)                  | 0 (0)       | 0 (0)                    | 0 (0)               | 0 (0) |
| bone                               | 32  | 0 (0)                        | 4 (0.1)  | 0 (0)    | 1 (0)   | 0 (0)       | 0 (0)                  | 1 (0)       | 0 (0)                    | 0 (0)               | 0 (0) |
| breast                             | 42  | 0 (0)                        | 7 (0.2)  | 0 (0)    | 0 (0)   | 0 (0)       | 0 (0)                  | 0 (0)       | 0 (0)                    | 0 (0)               | 0 (0) |
| central_nervous_system             | 55  | 0 (0)                        | 3 (0.1)  | 1 (0)    | 1 (0)   | 0 (0)       | 0 (0)                  | 0 (0)       | 0 (0)                    | 0 (0)               | 0 (0) |
| cervix                             | 11  | 0 (0)                        | 0 (0)    | 1 (0.1)  | 1 (0.1) | 0 (0)       | 0 (0)                  | 0 (0)       | 0 (0)                    | 0 (0)               | 0 (0) |
| endometrium                        | 9   | 0 (0)                        | 0 (0)    | 0 (0)    | 0 (0)   | 0 (0)       | 0 (0)                  | 0 (0)       | 1 (0.1)                  | 0 (0)               | 0 (0) |
| eye                                | 1   | 0 (0)                        | 0 (0)    | 0 (0)    | 0 (0)   | 0 (0)       | 0 (0)                  | 0 (0)       | 0 (0)                    | 0 (0)               | 0 (0) |
| gastrointestinal_tract             | 1   | 0 (0)                        | 0 (0)    | 1 (1)    | 0 (0)   | 0 (0)       | 0 (0)                  | 0 (0)       | 0 (0)                    | 0 (0)               | 0 (0) |
| haematopoietic_and_lymphoid_tissue | 124 | 0 (0)                        | 6 (0)    | 0 (0)    | 1 (0)   | 0 (0)       | 0 (0)                  | 1 (0)       | 0 (0)                    | 0 (0)               | 0 (0) |
| kidney                             | 20  | 0 (0)                        | 5 (0.3)  | 1 (0.1)  | 0 (0)   | 0 (0)       | 0 (0)                  | 0 (0)       | 0 (0)                    | 0 (0)               | 0 (0) |
| large_intestine                    | 36  | 0 (0)                        | 4 (0.1)  | 0 (0)    | 1 (0)   | 0 (0)       | 0 (0)                  | 1 (0)       | 3 (0.1)                  | 0 (0)               | 0 (0) |
| liver                              | 8   | 0 (0)                        | 1 (0.1)  | 0 (0)    | 0 (0)   | 0 (0)       | 0 (0)                  | 0 (0)       | 1 (0.1)                  | 0 (0)               | 0 (0) |
| lung                               | 145 | 0 (0)                        | 21 (0.1) | 23 (0.2) | 6 (0)   | 0 (0)       | 0 (0)                  | 0 (0)       | 4 (0)                    | 0 (0)               | 0 (0) |
| oesophagus                         | 21  | 0 (0)                        | 2 (0.1)  | 4 (0.2)  | 0 (0)   | 1 (0)       | 0 (0)                  | 1 (0)       | 0 (0)                    | 0 (0)               | 0 (0) |
| ovary                              | 22  | 0 (0)                        | 4 (0.2)  | 0 (0)    | 0 (0)   | 0 (0)       | 0 (0)                  | 0 (0)       | 1 (0)                    | 0 (0)               | 0 (0) |
| pancreas                           | 17  | 0 (0)                        | 1 (0.1)  | 1 (0.1)  | 0 (0)   | 0 (0)       | 0 (0)                  | 0 (0)       | 0 (0)                    | 0 (0)               | 0 (0) |
| placenta                           | 2   | 0 (0)                        | 0 (0)    | 0 (0)    | 0 (0)   | 0 (0)       | 0 (0)                  | 0 (0)       | 0 (0)                    | 0 (0)               | 0 (0) |
| pleura                             | 5   | 0 (0)                        | 2 (0.4)  | 0 (0)    | 0 (0)   | 1 (0.2)     | 0 (0)                  | 1 (0.2)     | 0 (0)                    | 0 (0)               | 0 (0) |
| prostate                           | 5   | 0 (0)                        | 2 (0.4)  | 0 (0)    | 0 (0)   | 0 (0)       | 0 (0)                  | 0 (0)       | 0 (0)                    | 0 (0)               | 0 (0) |
| skin                               | 51  | 0 (0)                        | 6 (0.1)  | 3 (0.1)  | 0 (0)   | 0 (0)       | 0 (0)                  | 0 (0)       | 1 (0)                    | 0 (0)               | 0 (0) |
| small_intestine                    | 1   | 0 (0)                        | 0 (0)    | 0 (0)    | 0 (0)   | 0 (0)       | 0 (0)                  | 0 (0)       | 1 (1)                    | 0 (0)               | 0 (0) |
| soft_tissue                        | 19  | 0 (0)                        | 3 (0.2)  | 0 (0)    | 0 (0)   | 0 (0)       | 0 (0)                  | 0 (0)       | 0 (0)                    | 0 (0)               | 0 (0) |
| stomach                            | 21  | 0 (0)                        | 2 (0.1)  | 0 (0)    | 1 (0)   | 0 (0)       | 1 (0)                  | 0 (0)       | 1 (0)                    | 0 (0)               | 0 (0) |
| testis                             | 3   | 0 (0)                        | 1 (0.3)  | 0 (0)    | 0 (0)   | 0 (0)       | 0 (0)                  | 0 (0)       | 0 (0)                    | 0 (0)               | 0 (0) |
| thyroid                            | 11  | 0 (0)                        | 1 (0.1)  | 0 (0)    | 1 (0.1) | 0 (0)       | 0 (0)                  | 1 (0.1)     | 0 (0)                    | 0 (0)               | 0 (0) |
| not specified                      | 1   | 0 (0)                        | 0 (0)    | 0 (0)    | 0 (0)   | 0 (0)       | 0 (0)                  | 0 (0)       | 0 (0)                    | 0 (0)               | 0 (0) |
| upper_aerodigestive_tract          | 20  | 0 (0)                        | 0 (0)    | 3 (0.2)  | 0 (0)   | 0 (0)       | 0 (0)                  | 0 (0)       | 0 (0)                    | 0 (0)               | 0 (0) |
| urinary_tract                      | 16  | 0 (0)                        | 0 (0)    | 0 (0)    | 0 (0)   | 0 (0)       | 0 (0)                  | 0 (0)       | 0 (0)                    | 0 (0)               | 0 (0) |
| vulva                              | 3   | 0 (0)                        | 0 (0)    | 0 (0)    | 0 (0)   | 0 (0)       | 0 (0)                  | 0 (0)       | 0 (0)                    | 0 (0)               | 0 (0) |

CYLD (KCG)

| Cancer Cell lines                  |     | Somatic hemizygous deletions |          |          |          | Somatic HDs | Somatic Amplifications | Breakpoints | Known Cancer Gene Screen |                     |       |
|------------------------------------|-----|------------------------------|----------|----------|----------|-------------|------------------------|-------------|--------------------------|---------------------|-------|
| Tissue                             | №   | <1Mb                         | >1Mb     | Arm      | Chr      |             |                        |             | Point Mutations LOM      | Point Mutations TOV | HDs   |
| adrenal_gland                      | 2   | 0 (0)                        | 1 (0.5)  | 1 (0.5)  | 0 (0)    | 0 (0)       | 0 (0)                  | 0 (0)       | 0 (0)                    | 0 (0)               | 0 (0) |
| autonomic_ganglia                  | 36  | 0 (0)                        | 2 (0.1)  | 0 (0)    | 0 (0)    | 0 (0)       | 0 (0)                  | 0 (0)       | 0 (0)                    | 0 (0)               | 0 (0) |
| biliary_tract                      | 6   | 0 (0)                        | 0 (0)    | 1 (0.2)  | 0 (0)    | 0 (0)       | 0 (0)                  | 0 (0)       | 0 (0)                    | 0 (0)               | 0 (0) |
| bone                               | 32  | 0 (0)                        | 4 (0.1)  | 2 (0.1)  | 1 (0)    | 0 (0)       | 0 (0)                  | 0 (0)       | 0 (0)                    | 0 (0)               | 0 (0) |
| breast                             | 42  | 0 (0)                        | 11 (0.3) | 4 (0.1)  | 1 (0)    | 1 (0)       | 0 (0)                  | 1 (0)       | 0 (0)                    | 0 (0)               | 1 (0) |
| central_nervous_system             | 55  | 0 (0)                        | 3 (0.1)  | 0 (0)    | 0 (0)    | 0 (0)       | 0 (0)                  | 0 (0)       | 0 (0)                    | 0 (0)               | 0 (0) |
| cervix                             | 11  | 0 (0)                        | 0 (0)    | 0 (0)    | 0 (0)    | 0 (0)       | 0 (0)                  | 0 (0)       | 0 (0)                    | 0 (0)               | 0 (0) |
| endometrium                        | 9   | 0 (0)                        | 1 (0.1)  | 1 (0.1)  | 0 (0)    | 0 (0)       | 0 (0)                  | 0 (0)       | 0 (0)                    | 0 (0)               | 0 (0) |
| eye                                | 1   | 0 (0)                        | 0 (0)    | 0 (0)    | 0 (0)    | 0 (0)       | 0 (0)                  | 0 (0)       | 0 (0)                    | 0 (0)               | 0 (0) |
| gastrointestinal_tract             | 1   | 0 (0)                        | 0 (0)    | 0 (0)    | 0 (0)    | 0 (0)       | 0 (0)                  | 0 (0)       | 0 (0)                    | 0 (0)               | 0 (0) |
| haematopoietic_and_lymphoid_tissue | 124 | 0 (0)                        | 9 (0.1)  | 4 (0)    | 2 (0)    | 0 (0)       | 0 (0)                  | 0 (0)       | 1 (0)                    | 0 (0)               | 0 (0) |
| kidney                             | 20  | 0 (0)                        | 1 (0.1)  | 0 (0)    | 3 (0.2)  | 0 (0)       | 0 (0)                  | 0 (0)       | 0 (0)                    | 0 (0)               | 0 (0) |
| large_intestine                    | 36  | 0 (0)                        | 0 (0)    | 0 (0)    | 0 (0)    | 0 (0)       | 0 (0)                  | 0 (0)       | 0 (0)                    | 1 (0)               | 0 (0) |
| liver                              | 8   | 0 (0)                        | 1 (0.1)  | 1 (0.1)  | 2 (0.3)  | 0 (0)       | 0 (0)                  | 0 (0)       | 0 (0)                    | 0 (0)               | 0 (0) |
| lung                               | 145 | 0 (0)                        | 30 (0.2) | 10 (0.1) | 11 (0.1) | 0 (0)       | 0 (0)                  | 1 (0)       | 0 (0)                    | 0 (0)               | 0 (0) |
| oesophagus                         | 21  | 0 (0)                        | 1 (0)    | 0 (0)    | 2 (0.1)  | 0 (0)       | 0 (0)                  | 0 (0)       | 0 (0)                    | 0 (0)               | 0 (0) |
| ovary                              | 22  | 0 (0)                        | 2 (0.1)  | 1 (0)    | 2 (0.1)  | 0 (0)       | 0 (0)                  | 0 (0)       | 0 (0)                    | 0 (0)               | 0 (0) |
| pancreas                           | 17  | 0 (0)                        | 3 (0.2)  | 0 (0)    | 1 (0.1)  | 0 (0)       | 0 (0)                  | 0 (0)       | 0 (0)                    | 0 (0)               | 0 (0) |
| placenta                           | 2   | 0 (0)                        | 0 (0)    | 0 (0)    | 0 (0)    | 0 (0)       | 0 (0)                  | 0 (0)       | 0 (0)                    | 0 (0)               | 0 (0) |
| pleura                             | 5   | 0 (0)                        | 0 (0)    | 0 (0)    | 0 (0)    | 0 (0)       | 0 (0)                  | 0 (0)       | 0 (0)                    | 0 (0)               | 0 (0) |
| prostate                           | 5   | 0 (0)                        | 0 (0)    | 0 (0)    | 1 (0.2)  | 0 (0)       | 0 (0)                  | 0 (0)       | 0 (0)                    | 0 (0)               | 0 (0) |
| skin                               | 51  | 0 (0)                        | 7 (0.1)  | 0 (0)    | 0 (0)    | 0 (0)       | 0 (0)                  | 0 (0)       | 0 (0)                    | 0 (0)               | 0 (0) |
| small_intestine                    | 1   | 0 (0)                        | 0 (0)    | 0 (0)    | 0 (0)    | 0 (0)       | 0 (0)                  | 0 (0)       | 0 (0)                    | 0 (0)               | 0 (0) |
| soft_tissue                        | 19  | 0 (0)                        | 0 (0)    | 0 (0)    | 0 (0)    | 0 (0)       | 0 (0)                  | 0 (0)       | 0 (0)                    | 0 (0)               | 0 (0) |
| stomach                            | 21  | 0 (0)                        | 1 (0)    | 0 (0)    | 1 (0)    | 0 (0)       | 0 (0)                  | 0 (0)       | 0 (0)                    | 1 (0)               | 0 (0) |
| testis                             | 3   | 0 (0)                        | 0 (0)    | 0 (0)    | 1 (0.3)  | 0 (0)       | 0 (0)                  | 0 (0)       | 0 (0)                    | 0 (0)               | 0 (0) |
| thyroid                            | 11  | 0 (0)                        | 1 (0.1)  | 1 (0.1)  | 1 (0.1)  | 0 (0)       | 0 (0)                  | 0 (0)       | 0 (0)                    | 0 (0)               | 0 (0) |
| not specified                      | 1   | 0 (0)                        | 0 (0)    | 0 (0)    | 0 (0)    | 0 (0)       | 0 (0)                  | 0 (0)       | 0 (0)                    | 0 (0)               | 0 (0) |
| upper_aerodigestive_tract          | 20  | 0 (0)                        | 1 (0.1)  | 2 (0.1)  | 0 (0)    | 0 (0)       | 0 (0)                  | 0 (0)       | 0 (0)                    | 0 (0)               | 0 (0) |
| urinary_tract                      | 16  | 0 (0)                        | 1 (0.1)  | 1 (0.1)  | 1 (0.1)  | 0 (0)       | 0 (0)                  | 0 (0)       | 0 (0)                    | 0 (0)               | 0 (0) |
| vulva                              | 3   | 0 (0)                        | 0 (0)    | 0 (0)    | 0 (0)    | 0 (0)       | 0 (0)                  | 0 (0)       | 0 (0)                    | 0 (0)               | 0 (0) |

EGFR (KCG)

| Cancer Cell lines                  |     | Somatic hemizygous deletions |          |         |         | Somatic HDs | Somatic Amplifications | Breakpoints | Known Cancer Gene Screen |                     |       |
|------------------------------------|-----|------------------------------|----------|---------|---------|-------------|------------------------|-------------|--------------------------|---------------------|-------|
| Tissue                             | №   | <1Mb                         | >1Mb     | Arm     | Chr     |             |                        |             | Point Mutations LOM      | Point Mutations TOV | HDs   |
| adrenal_gland                      | 2   | 0 (0)                        | 0 (0)    | 1 (0.5) | 0 (0)   | 0 (0)       | 0 (0)                  | 0 (0)       | 0 (0)                    | 0 (0)               | 0 (0) |
| autonomic_ganglia                  | 36  | 0 (0)                        | 0 (0)    | 1 (0)   | 0 (0)   | 0 (0)       | 0 (0)                  | 0 (0)       | 0 (0)                    | 0 (0)               | 0 (0) |
| biliary_tract                      | 6   | 0 (0)                        | 0 (0)    | 0 (0)   | 0 (0)   | 0 (0)       | 0 (0)                  | 0 (0)       | 0 (0)                    | 0 (0)               | 0 (0) |
| bone                               | 32  | 0 (0)                        | 2 (0.1)  | 0 (0)   | 0 (0)   | 0 (0)       | 0 (0)                  | 1 (0)       | 0 (0)                    | 0 (0)               | 0 (0) |
| breast                             | 42  | 0 (0)                        | 0 (0)    | 2 (0)   | 0 (0)   | 0 (0)       | 1 (0)                  | 1 (0)       | 0 (0)                    | 0 (0)               | 0 (0) |
| central_nervous_system             | 55  | 0 (0)                        | 1 (0)    | 0 (0)   | 3 (0.1) | 0 (0)       | 1 (0)                  | 5 (0.1)     | 2 (0)                    | 0 (0)               | 0 (0) |
| cervix                             | 11  | 0 (0)                        | 0 (0)    | 1 (0.1) | 0 (0)   | 0 (0)       | 0 (0)                  | 0 (0)       | 0 (0)                    | 0 (0)               | 0 (0) |
| endometrium                        | 9   | 0 (0)                        | 1 (0.1)  | 0 (0)   | 0 (0)   | 0 (0)       | 0 (0)                  | 0 (0)       | 0 (0)                    | 0 (0)               | 0 (0) |
| eye                                | 1   | 0 (0)                        | 0 (0)    | 0 (0)   | 0 (0)   | 0 (0)       | 0 (0)                  | 0 (0)       | 0 (0)                    | 0 (0)               | 0 (0) |
| gastrointestinal_tract             | 1   | 0 (0)                        | 0 (0)    | 0 (0)   | 0 (0)   | 0 (0)       | 0 (0)                  | 0 (0)       | 0 (0)                    | 0 (0)               | 0 (0) |
| haematopoietic_and_lymphoid_tissue | 124 | 0 (0)                        | 3 (0)    | 1 (0)   | 1 (0)   | 0 (0)       | 0 (0)                  | 0 (0)       | 0 (0)                    | 0 (0)               | 0 (0) |
| kidney                             | 20  | 0 (0)                        | 1 (0.1)  | 0 (0)   | 0 (0)   | 0 (0)       | 0 (0)                  | 0 (0)       | 0 (0)                    | 0 (0)               | 0 (0) |
| large_intestine                    | 36  | 0 (0)                        | 0 (0)    | 0 (0)   | 0 (0)   | 0 (0)       | 0 (0)                  | 3 (0.1)     | 1 (0)                    | 0 (0)               | 0 (0) |
| liver                              | 8   | 0 (0)                        | 0 (0)    | 0 (0)   | 0 (0)   | 0 (0)       | 0 (0)                  | 1 (0.1)     | 0 (0)                    | 0 (0)               | 0 (0) |
| lung                               | 145 | 0 (0)                        | 10 (0.1) | 2 (0)   | 4 (0)   | 0 (0)       | 2 (0)                  | 7 (0)       | 3 (0)                    | 0 (0)               | 0 (0) |
| oesophagus                         | 21  | 0 (0)                        | 1 (0)    | 0 (0)   | 1 (0)   | 0 (0)       | 2 (0.1)                | 1 (0)       | 1 (0)                    | 0 (0)               | 0 (0) |
| ovary                              | 22  | 0 (0)                        | 3 (0.1)  | 0 (0)   | 0 (0)   | 0 (0)       | 0 (0)                  | 0 (0)       | 0 (0)                    | 0 (0)               | 0 (0) |
| pancreas                           | 17  | 0 (0)                        | 0 (0)    | 0 (0)   | 0 (0)   | 0 (0)       | 0 (0)                  | 0 (0)       | 0 (0)                    | 0 (0)               | 0 (0) |
| placenta                           | 2   | 0 (0)                        | 0 (0)    | 0 (0)   | 0 (0)   | 0 (0)       | 0 (0)                  | 0 (0)       | 0 (0)                    | 0 (0)               | 0 (0) |
| pleura                             | 5   | 0 (0)                        | 0 (0)    | 0 (0)   | 1 (0.2) | 0 (0)       | 0 (0)                  | 0 (0)       | 0 (0)                    | 0 (0)               | 0 (0) |
| prostate                           | 5   | 0 (0)                        | 0 (0)    | 0 (0)   | 0 (0)   | 0 (0)       | 0 (0)                  | 0 (0)       | 0 (0)                    | 0 (0)               | 0 (0) |
| skin                               | 51  | 0 (0)                        | 2 (0)    | 0 (0)   | 0 (0)   | 0 (0)       | 1 (0)                  | 1 (0)       | 0 (0)                    | 0 (0)               | 0 (0) |
| small_intestine                    | 1   | 0 (0)                        | 0 (0)    | 0 (0)   | 0 (0)   | 0 (0)       | 0 (0)                  | 0 (0)       | 0 (0)                    | 0 (0)               | 0 (0) |
| soft_tissue                        | 19  | 0 (0)                        | 0 (0)    | 1 (0.1) | 1 (0.1) | 0 (0)       | 0 (0)                  | 1 (0.1)     | 0 (0)                    | 0 (0)               | 0 (0) |
| stomach                            | 21  | 0 (0)                        | 0 (0)    | 0 (0)   | 0 (0)   | 0 (0)       | 0 (0)                  | 1 (0)       | 0 (0)                    | 0 (0)               | 0 (0) |
| testis                             | 3   | 0 (0)                        | 0 (0)    | 0 (0)   | 0 (0)   | 0 (0)       | 0 (0)                  | 0 (0)       | 0 (0)                    | 0 (0)               | 0 (0) |
| thyroid                            | 11  | 0 (0)                        | 1 (0.1)  | 0 (0)   | 0 (0)   | 0 (0)       | 0 (0)                  | 0 (0)       | 0 (0)                    | 0 (0)               | 0 (0) |
| not specified                      | 1   | 0 (0)                        | 0 (0)    | 0 (0)   | 0 (0)   | 0 (0)       | 0 (0)                  | 0 (0)       | 1 (1)                    | 0 (0)               | 0 (0) |
| upper_aerodigestive_tract          | 20  | 0 (0)                        | 0 (0)    | 0 (0)   | 0 (0)   | 0 (0)       | 2 (0.1)                | 0 (0)       | 0 (0)                    | 0 (0)               | 0 (0) |
| urinary_tract                      | 16  | 0 (0)                        | 0 (0)    | 0 (0)   | 0 (0)   | 0 (0)       | 0 (0)                  | 0 (0)       | 0 (0)                    | 0 (0)               | 0 (0) |
| vulva                              | 3   | 0 (0)                        | 0 (0)    | 0 (0)   | 0 (0)   | 0 (0)       | 0 (0)                  | 0 (0)       | 0 (0)                    | 0 (0)               | 0 (0) |

## ERBB2 (KCG)

| Cancer Cell lines                  |     | Somatic hemizygous deletions |          |         |          | Somatic HDs | Somatic Amplifications | Breakpoints | Known Cancer Gene Screen |                     |       |
|------------------------------------|-----|------------------------------|----------|---------|----------|-------------|------------------------|-------------|--------------------------|---------------------|-------|
| Tissue                             | №   | <1Mb                         | >1Mb     | Arm     | Chr      |             |                        |             | Point Mutations LOM      | Point Mutations TOV | HDs   |
| adrenal_gland                      | 2   | 0 (0)                        | 0 (0)    | 0 (0)   | 1 (0.5)  | 0 (0)       | 0 (0)                  | 0 (0)       | 0 (0)                    | 0 (0)               | 0 (0) |
| autonomic_ganglia                  | 36  | 0 (0)                        | 1 (0)    | 0 (0)   | 1 (0)    | 0 (0)       | 0 (0)                  | 0 (0)       | 0 (0)                    | 0 (0)               | 0 (0) |
| biliary_tract                      | 6   | 0 (0)                        | 2 (0.3)  | 0 (0)   | 0 (0)    | 0 (0)       | 0 (0)                  | 0 (0)       | 0 (0)                    | 0 (0)               | 0 (0) |
| bone                               | 32  | 0 (0)                        | 5 (0.2)  | 0 (0)   | 5 (0.2)  | 0 (0)       | 0 (0)                  | 0 (0)       | 0 (0)                    | 0 (0)               | 0 (0) |
| breast                             | 42  | 0 (0)                        | 2 (0)    | 2 (0)   | 8 (0.2)  | 0 (0)       | 9 (0.2)                | 1 (0)       | 0 (0)                    | 0 (0)               | 0 (0) |
| central_nervous_system             | 55  | 0 (0)                        | 6 (0.1)  | 0 (0)   | 9 (0.2)  | 0 (0)       | 0 (0)                  | 0 (0)       | 0 (0)                    | 0 (0)               | 0 (0) |
| cervix                             | 11  | 0 (0)                        | 1 (0.1)  | 1 (0.1) | 1 (0.1)  | 0 (0)       | 0 (0)                  | 0 (0)       | 0 (0)                    | 0 (0)               | 0 (0) |
| endometrium                        | 9   | 0 (0)                        | 0 (0)    | 0 (0)   | 0 (0)    | 0 (0)       | 0 (0)                  | 0 (0)       | 0 (0)                    | 0 (0)               | 0 (0) |
| eye                                | 1   | 0 (0)                        | 0 (0)    | 0 (0)   | 0 (0)    | 0 (0)       | 0 (0)                  | 0 (0)       | 0 (0)                    | 0 (0)               | 0 (0) |
| gastrointestinal_tract             | 1   | 0 (0)                        | 1 (1)    | 0 (0)   | 0 (0)    | 0 (0)       | 0 (0)                  | 0 (0)       | 0 (0)                    | 0 (0)               | 0 (0) |
| haematopoietic_and_lymphoid_tissue | 124 | 0 (0)                        | 4 (0)    | 0 (0)   | 3 (0)    | 0 (0)       | 0 (0)                  | 0 (0)       | 0 (0)                    | 0 (0)               | 0 (0) |
| kidney                             | 20  | 0 (0)                        | 0 (0)    | 0 (0)   | 3 (0.2)  | 0 (0)       | 0 (0)                  | 0 (0)       | 0 (0)                    | 0 (0)               | 0 (0) |
| large_intestine                    | 36  | 0 (0)                        | 3 (0.1)  | 0 (0)   | 4 (0.1)  | 0 (0)       | 0 (0)                  | 0 (0)       | 0 (0)                    | 0 (0)               | 0 (0) |
| liver                              | 8   | 0 (0)                        | 2 (0.3)  | 0 (0)   | 0 (0)    | 0 (0)       | 0 (0)                  | 0 (0)       | 0 (0)                    | 0 (0)               | 0 (0) |
| lung                               | 145 | 2 (0)                        | 11 (0.1) | 0 (0)   | 15 (0.1) | 0 (0)       | 2 (0)                  | 0 (0)       | 0 (0)                    | 0 (0)               | 0 (0) |
| oesophagus                         | 21  | 0 (0)                        | 4 (0.2)  | 0 (0)   | 4 (0.2)  | 0 (0)       | 3 (0.1)                | 1 (0)       | 0 (0)                    | 0 (0)               | 0 (0) |
| ovary                              | 22  | 0 (0)                        | 2 (0.1)  | 0 (0)   | 5 (0.2)  | 0 (0)       | 1 (0)                  | 0 (0)       | 0 (0)                    | 0 (0)               | 0 (0) |
| pancreas                           | 17  | 0 (0)                        | 0 (0)    | 0 (0)   | 1 (0.1)  | 0 (0)       | 0 (0)                  | 1 (0.1)     | 0 (0)                    | 0 (0)               | 0 (0) |
| placenta                           | 2   | 0 (0)                        | 0 (0)    | 0 (0)   | 0 (0)    | 0 (0)       | 0 (0)                  | 0 (0)       | 0 (0)                    | 0 (0)               | 0 (0) |
| pleura                             | 5   | 0 (0)                        | 1 (0.2)  | 0 (0)   | 1 (0.2)  | 0 (0)       | 0 (0)                  | 0 (0)       | 0 (0)                    | 0 (0)               | 0 (0) |
| prostate                           | 5   | 0 (0)                        | 0 (0)    | 0 (0)   | 0 (0)    | 0 (0)       | 0 (0)                  | 0 (0)       | 0 (0)                    | 0 (0)               | 0 (0) |
| skin                               | 51  | 0 (0)                        | 2 (0)    | 0 (0)   | 3 (0.1)  | 0 (0)       | 0 (0)                  | 0 (0)       | 0 (0)                    | 0 (0)               | 0 (0) |
| small_intestine                    | 1   | 0 (0)                        | 0 (0)    | 0 (0)   | 0 (0)    | 0 (0)       | 0 (0)                  | 0 (0)       | 0 (0)                    | 0 (0)               | 0 (0) |
| soft_tissue                        | 19  | 0 (0)                        | 0 (0)    | 0 (0)   | 2 (0.1)  | 0 (0)       | 0 (0)                  | 0 (0)       | 0 (0)                    | 0 (0)               | 0 (0) |
| stomach                            | 21  | 1 (0)                        | 0 (0)    | 0 (0)   | 2 (0.1)  | 0 (0)       | 2 (0.1)                | 0 (0)       | 0 (0)                    | 0 (0)               | 0 (0) |
| testis                             | 3   | 0 (0)                        | 1 (0.3)  | 0 (0)   | 0 (0)    | 0 (0)       | 0 (0)                  | 0 (0)       | 0 (0)                    | 0 (0)               | 0 (0) |
| thyroid                            | 11  | 0 (0)                        | 1 (0.1)  | 0 (0)   | 4 (0.4)  | 0 (0)       | 0 (0)                  | 0 (0)       | 0 (0)                    | 0 (0)               | 0 (0) |
| not specified                      | 1   | 0 (0)                        | 0 (0)    | 0 (0)   | 0 (0)    | 0 (0)       | 0 (0)                  | 0 (0)       | 0 (0)                    | 0 (0)               | 0 (0) |
| upper_aerodigestive_tract          | 20  | 0 (0)                        | 1 (0.1)  | 1 (0.1) | 1 (0.1)  | 0 (0)       | 0 (0)                  | 0 (0)       | 0 (0)                    | 0 (0)               | 0 (0) |
| urinary_tract                      | 16  | 0 (0)                        | 1 (0.1)  | 0 (0)   | 0 (0)    | 0 (0)       | 0 (0)                  | 0 (0)       | 0 (0)                    | 0 (0)               | 0 (0) |
| vulva                              | 3   | 0 (0)                        | 0 (0)    | 0 (0)   | 0 (0)    | 0 (0)       | 0 (0)                  | 0 (0)       | 0 (0)                    | 0 (0)               | 0 (0) |

## FBXW7 (KCG)

| Cancer Cell lines                  |     | Somatic hemizygous deletions |          |         |         | Somatic HDs | Somatic Amplifications | Breakpoints | Known Cancer Gene Screen |                     |       |
|------------------------------------|-----|------------------------------|----------|---------|---------|-------------|------------------------|-------------|--------------------------|---------------------|-------|
| Tissue                             | №   | <1Mb                         | >1Mb     | Arm     | Chr     |             |                        |             | Point Mutations LOM      | Point Mutations TOV | HDs   |
| adrenal_gland                      | 2   | 0 (0)                        | 0 (0)    | 0 (0)   | 0 (0)   | 0 (0)       | 0 (0)                  | 0 (0)       | 0 (0)                    | 0 (0)               | 0 (0) |
| autonomic_ganglia                  | 36  | 0 (0)                        | 0 (0)    | 0 (0)   | 0 (0)   | 0 (0)       | 0 (0)                  | 0 (0)       | 0 (0)                    | 0 (0)               | 0 (0) |
| biliary_tract                      | 6   | 0 (0)                        | 0 (0)    | 0 (0)   | 0 (0)   | 0 (0)       | 0 (0)                  | 0 (0)       | 1 (0.2)                  | 0 (0)               | 0 (0) |
| bone                               | 32  | 0 (0)                        | 3 (0.1)  | 0 (0)   | 1 (0)   | 0 (0)       | 0 (0)                  | 0 (0)       | 0 (0)                    | 0 (0)               | 0 (0) |
| breast                             | 42  | 0 (0)                        | 5 (0.1)  | 0 (0)   | 4 (0.1) | 0 (0)       | 0 (0)                  | 1 (0)       | 0 (0)                    | 0 (0)               | 0 (0) |
| central_nervous_system             | 55  | 0 (0)                        | 3 (0.1)  | 1 (0)   | 1 (0)   | 0 (0)       | 0 (0)                  | 0 (0)       | 0 (0)                    | 0 (0)               | 0 (0) |
| cervix                             | 11  | 0 (0)                        | 2 (0.2)  | 0 (0)   | 1 (0.1) | 0 (0)       | 0 (0)                  | 0 (0)       | 0 (0)                    | 0 (0)               | 0 (0) |
| endometrium                        | 9   | 0 (0)                        | 0 (0)    | 0 (0)   | 0 (0)   | 0 (0)       | 0 (0)                  | 1 (0.1)     | 3 (0.3)                  | 0 (0)               | 0 (0) |
| eye                                | 1   | 0 (0)                        | 0 (0)    | 0 (0)   | 0 (0)   | 0 (0)       | 0 (0)                  | 0 (0)       | 0 (0)                    | 0 (0)               | 0 (0) |
| gastrointestinal_tract             | 1   | 0 (0)                        | 0 (0)    | 0 (0)   | 0 (0)   | 0 (0)       | 0 (0)                  | 0 (0)       | 0 (0)                    | 0 (0)               | 0 (0) |
| haematopoietic_and_lymphoid_tissue | 124 | 0 (0)                        | 9 (0.1)  | 0 (0)   | 0 (0)   | 0 (0)       | 0 (0)                  | 2 (0)       | 9 (0.1)                  | 0 (0)               | 0 (0) |
| kidney                             | 20  | 0 (0)                        | 1 (0.1)  | 2 (0.1) | 1 (0.1) | 0 (0)       | 0 (0)                  | 0 (0)       | 1 (0.1)                  | 0 (0)               | 0 (0) |
| large_intestine                    | 36  | 0 (0)                        | 4 (0.1)  | 0 (0)   | 1 (0)   | 0 (0)       | 0 (0)                  | 0 (0)       | 7 (0.2)                  | 0 (0)               | 0 (0) |
| liver                              | 8   | 0 (0)                        | 1 (0.1)  | 0 (0)   | 0 (0)   | 0 (0)       | 0 (0)                  | 0 (0)       | 0 (0)                    | 0 (0)               | 0 (0) |
| lung                               | 145 | 0 (0)                        | 22 (0.2) | 3 (0)   | 2 (0)   | 0 (0)       | 0 (0)                  | 0 (0)       | 0 (0)                    | 0 (0)               | 0 (0) |
| oesophagus                         | 21  | 0 (0)                        | 3 (0.1)  | 0 (0)   | 1 (0)   | 0 (0)       | 0 (0)                  | 0 (0)       | 0 (0)                    | 0 (0)               | 0 (0) |
| ovary                              | 22  | 0 (0)                        | 1 (0)    | 0 (0)   | 0 (0)   | 0 (0)       | 0 (0)                  | 1 (0)       | 1 (0)                    | 0 (0)               | 0 (0) |
| pancreas                           | 17  | 0 (0)                        | 4 (0.2)  | 0 (0)   | 1 (0.1) | 0 (0)       | 0 (0)                  | 0 (0)       | 1 (0.1)                  | 0 (0)               | 0 (0) |
| placenta                           | 2   | 0 (0)                        | 0 (0)    | 0 (0)   | 0 (0)   | 0 (0)       | 0 (0)                  | 0 (0)       | 0 (0)                    | 0 (0)               | 0 (0) |
| pleura                             | 5   | 0 (0)                        | 1 (0.2)  | 1 (0.2) | 0 (0)   | 0 (0)       | 0 (0)                  | 0 (0)       | 0 (0)                    | 0 (0)               | 0 (0) |
| prostate                           | 5   | 0 (0)                        | 2 (0.4)  | 0 (0)   | 0 (0)   | 0 (0)       | 0 (0)                  | 0 (0)       | 0 (0)                    | 0 (0)               | 0 (0) |
| skin                               | 51  | 0 (0)                        | 1 (0)    | 0 (0)   | 2 (0)   | 0 (0)       | 0 (0)                  | 0 (0)       | 1 (0)                    | 0 (0)               | 0 (0) |
| small_intestine                    | 1   | 0 (0)                        | 0 (0)    | 0 (0)   | 0 (0)   | 0 (0)       | 0 (0)                  | 0 (0)       | 0 (0)                    | 0 (0)               | 0 (0) |
| soft_tissue                        | 19  | 0 (0)                        | 3 (0.2)  | 0 (0)   | 1 (0.1) | 0 (0)       | 0 (0)                  | 0 (0)       | 0 (0)                    | 0 (0)               | 0 (0) |
| stomach                            | 21  | 0 (0)                        | 2 (0.1)  | 1 (0)   | 0 (0)   | 0 (0)       | 0 (0)                  | 0 (0)       | 2 (0.1)                  | 0 (0)               | 0 (0) |
| testis                             | 3   | 0 (0)                        | 0 (0)    | 0 (0)   | 0 (0)   | 0 (0)       | 0 (0)                  | 0 (0)       | 0 (0)                    | 0 (0)               | 0 (0) |
| thyroid                            | 11  | 0 (0)                        | 1 (0.1)  | 0 (0)   | 0 (0)   | 0 (0)       | 0 (0)                  | 0 (0)       | 0 (0)                    | 0 (0)               | 0 (0) |
| not specified                      | 1   | 0 (0)                        | 0 (0)    | 0 (0)   | 0 (0)   | 0 (0)       | 0 (0)                  | 0 (0)       | 0 (0)                    | 0 (0)               | 0 (0) |
| upper_aerodigestive_tract          | 20  | 0 (0)                        | 1 (0.1)  | 1 (0.1) | 0 (0)   | 0 (0)       | 0 (0)                  | 0 (0)       | 0 (0)                    | 0 (0)               | 0 (0) |
| urinary_tract                      | 16  | 0 (0)                        | 4 (0.3)  | 0 (0)   | 0 (0)   | 0 (0)       | 0 (0)                  | 1 (0.1)     | 0 (0)                    | 0 (0)               | 0 (0) |
| vulva                              | 3   | 0 (0)                        | 1 (0.3)  | 0 (0)   | 0 (0)   | 0 (0)       | 0 (0)                  | 0 (0)       | 0 (0)                    | 0 (0)               | 0 (0) |

FGFR3 (KCG)

| Cancer Cell lines                  |     | Somatic hemizygous deletions |          |         |         | Somatic HDs | Somatic Amplifications | Breakpoints | Known Cancer Gene Screen |                     |       |
|------------------------------------|-----|------------------------------|----------|---------|---------|-------------|------------------------|-------------|--------------------------|---------------------|-------|
| Tissue                             | №   | <1Mb                         | >1Mb     | Arm     | Chr     |             |                        |             | Point Mutations LOM      | Point Mutations TOV | HDs   |
| adrenal_gland                      | 2   | 0 (0)                        | 0 (0)    | 0 (0)   | 0 (0)   | 0 (0)       | 0 (0)                  | 0 (0)       | 0 (0)                    | 0 (0)               | 0 (0) |
| autonomic_ganglia                  | 36  | 0 (0)                        | 2 (0.1)  | 0 (0)   | 0 (0)   | 0 (0)       | 0 (0)                  | 0 (0)       | 0 (0)                    | 0 (0)               | 0 (0) |
| biliary_tract                      | 6   | 0 (0)                        | 1 (0.2)  | 0 (0)   | 0 (0)   | 0 (0)       | 0 (0)                  | 0 (0)       | 0 (0)                    | 0 (0)               | 0 (0) |
| bone                               | 32  | 0 (0)                        | 6 (0.2)  | 0 (0)   | 1 (0)   | 0 (0)       | 0 (0)                  | 0 (0)       | 0 (0)                    | 0 (0)               | 0 (0) |
| breast                             | 42  | 0 (0)                        | 9 (0.2)  | 2 (0)   | 4 (0.1) | 0 (0)       | 0 (0)                  | 0 (0)       | 0 (0)                    | 0 (0)               | 0 (0) |
| central_nervous_system             | 55  | 0 (0)                        | 1 (0)    | 0 (0)   | 1 (0)   | 0 (0)       | 0 (0)                  | 0 (0)       | 0 (0)                    | 0 (0)               | 0 (0) |
| cervix                             | 11  | 0 (0)                        | 0 (0)    | 3 (0.3) | 1 (0.1) | 0 (0)       | 0 (0)                  | 0 (0)       | 0 (0)                    | 0 (0)               | 0 (0) |
| endometrium                        | 9   | 0 (0)                        | 0 (0)    | 0 (0)   | 0 (0)   | 0 (0)       | 0 (0)                  | 0 (0)       | 0 (0)                    | 0 (0)               | 0 (0) |
| eye                                | 1   | 0 (0)                        | 0 (0)    | 0 (0)   | 0 (0)   | 0 (0)       | 0 (0)                  | 0 (0)       | 0 (0)                    | 0 (0)               | 0 (0) |
| gastrointestinal_tract             | 1   | 0 (0)                        | 0 (0)    | 0 (0)   | 0 (0)   | 0 (0)       | 0 (0)                  | 0 (0)       | 0 (0)                    | 0 (0)               | 0 (0) |
| haematopoietic_and_lymphoid_tissue | 124 | 0 (0)                        | 5 (0)    | 0 (0)   | 0 (0)   | 0 (0)       | 0 (0)                  | 0 (0)       | 1 (0)                    | 0 (0)               | 0 (0) |
| kidney                             | 20  | 0 (0)                        | 0 (0)    | 0 (0)   | 1 (0.1) | 0 (0)       | 0 (0)                  | 0 (0)       | 0 (0)                    | 0 (0)               | 0 (0) |
| large_intestine                    | 36  | 0 (0)                        | 3 (0.1)  | 1 (0)   | 1 (0)   | 0 (0)       | 0 (0)                  | 0 (0)       | 0 (0)                    | 0 (0)               | 0 (0) |
| liver                              | 8   | 0 (0)                        | 0 (0)    | 0 (0)   | 0 (0)   | 0 (0)       | 0 (0)                  | 0 (0)       | 0 (0)                    | 0 (0)               | 0 (0) |
| lung                               | 145 | 0 (0)                        | 14 (0.1) | 3 (0)   | 2 (0)   | 0 (0)       | 0 (0)                  | 0 (0)       | 0 (0)                    | 0 (0)               | 0 (0) |
| oesophagus                         | 21  | 0 (0)                        | 4 (0.2)  | 0 (0)   | 1 (0)   | 0 (0)       | 0 (0)                  | 0 (0)       | 0 (0)                    | 0 (0)               | 0 (0) |
| ovary                              | 22  | 1 (0)                        | 1 (0)    | 1 (0)   | 0 (0)   | 0 (0)       | 0 (0)                  | 0 (0)       | 0 (0)                    | 0 (0)               | 0 (0) |
| pancreas                           | 17  | 0 (0)                        | 2 (0.1)  | 0 (0)   | 1 (0.1) | 0 (0)       | 0 (0)                  | 0 (0)       | 0 (0)                    | 0 (0)               | 0 (0) |
| placenta                           | 2   | 0 (0)                        | 0 (0)    | 0 (0)   | 0 (0)   | 0 (0)       | 0 (0)                  | 0 (0)       | 0 (0)                    | 0 (0)               | 0 (0) |
| pleura                             | 5   | 0 (0)                        | 0 (0)    | 0 (0)   | 0 (0)   | 0 (0)       | 0 (0)                  | 0 (0)       | 0 (0)                    | 0 (0)               | 0 (0) |
| prostate                           | 5   | 0 (0)                        | 0 (0)    | 0 (0)   | 0 (0)   | 0 (0)       | 0 (0)                  | 0 (0)       | 0 (0)                    | 0 (0)               | 0 (0) |
| skin                               | 51  | 0 (0)                        | 5 (0.1)  | 0 (0)   | 2 (0)   | 0 (0)       | 0 (0)                  | 0 (0)       | 0 (0)                    | 0 (0)               | 0 (0) |
| small_intestine                    | 1   | 0 (0)                        | 0 (0)    | 0 (0)   | 0 (0)   | 0 (0)       | 0 (0)                  | 0 (0)       | 0 (0)                    | 0 (0)               | 0 (0) |
| soft_tissue                        | 19  | 0 (0)                        | 1 (0.1)  | 0 (0)   | 1 (0.1) | 0 (0)       | 0 (0)                  | 0 (0)       | 0 (0)                    | 0 (0)               | 0 (0) |
| stomach                            | 21  | 0 (0)                        | 4 (0.2)  | 2 (0.1) | 0 (0)   | 0 (0)       | 0 (0)                  | 0 (0)       | 0 (0)                    | 0 (0)               | 0 (0) |
| testis                             | 3   | 0 (0)                        | 1 (0.3)  | 0 (0)   | 0 (0)   | 0 (0)       | 0 (0)                  | 0 (0)       | 0 (0)                    | 0 (0)               | 0 (0) |
| thyroid                            | 11  | 0 (0)                        | 2 (0.2)  | 0 (0)   | 0 (0)   | 0 (0)       | 0 (0)                  | 0 (0)       | 0 (0)                    | 0 (0)               | 0 (0) |
| not specified                      | 1   | 0 (0)                        | 0 (0)    | 0 (0)   | 0 (0)   | 0 (0)       | 0 (0)                  | 0 (0)       | 0 (0)                    | 0 (0)               | 0 (0) |
| upper_aerodigestive_tract          | 20  | 0 (0)                        | 3 (0.2)  | 2 (0.1) | 0 (0)   | 0 (0)       | 0 (0)                  | 0 (0)       | 0 (0)                    | 0 (0)               | 0 (0) |
| urinary_tract                      | 16  | 0 (0)                        | 0 (0)    | 0 (0)   | 0 (0)   | 0 (0)       | 0 (0)                  | 0 (0)       | 1 (0.1)                  | 0 (0)               | 0 (0) |
| vulva                              | 3   | 0 (0)                        | 1 (0.3)  | 0 (0)   | 0 (0)   | 0 (0)       | 0 (0)                  | 0 (0)       | 0 (0)                    | 0 (0)               | 0 (0) |

FLT3 (KCG)

| Cancer Cell lines                  |     | Somatic hemizygous deletions |          |          |       | Somatic HDs | Somatic Amplifications | Breakpoints | Known Cancer Gene Screen |                     |       |
|------------------------------------|-----|------------------------------|----------|----------|-------|-------------|------------------------|-------------|--------------------------|---------------------|-------|
| Tissue                             | №   | <1Mb                         | >1Mb     | Arm      | Chr   |             |                        |             | Point Mutations LOM      | Point Mutations TOV | HDs   |
| adrenal_gland                      | 2   | 0 (0)                        | 0 (0)    | 0 (0)    | 0 (0) | 0 (0)       | 0 (0)                  | 0 (0)       | 0 (0)                    | 0 (0)               | 0 (0) |
| autonomic_ganglia                  | 36  | 0 (0)                        | 1 (0)    | 3 (0.1)  | 0 (0) | 0 (0)       | 0 (0)                  | 0 (0)       | 1 (0)                    | 0 (0)               | 0 (0) |
| biliary_tract                      | 6   | 0 (0)                        | 1 (0.2)  | 0 (0)    | 0 (0) | 0 (0)       | 0 (0)                  | 0 (0)       | 0 (0)                    | 0 (0)               | 0 (0) |
| bone                               | 32  | 0 (0)                        | 2 (0.1)  | 5 (0.2)  | 0 (0) | 0 (0)       | 0 (0)                  | 1 (0)       | 0 (0)                    | 0 (0)               | 0 (0) |
| breast                             | 42  | 0 (0)                        | 6 (0.1)  | 11 (0.3) | 0 (0) | 0 (0)       | 0 (0)                  | 0 (0)       | 0 (0)                    | 0 (0)               | 0 (0) |
| central_nervous_system             | 55  | 0 (0)                        | 8 (0.1)  | 13 (0.2) | 0 (0) | 0 (0)       | 0 (0)                  | 0 (0)       | 0 (0)                    | 0 (0)               | 0 (0) |
| cervix                             | 11  | 0 (0)                        | 0 (0)    | 3 (0.3)  | 0 (0) | 0 (0)       | 0 (0)                  | 0 (0)       | 0 (0)                    | 0 (0)               | 0 (0) |
| endometrium                        | 9   | 0 (0)                        | 0 (0)    | 1 (0.1)  | 0 (0) | 0 (0)       | 0 (0)                  | 0 (0)       | 0 (0)                    | 0 (0)               | 0 (0) |
| eye                                | 1   | 0 (0)                        | 0 (0)    | 0 (0)    | 0 (0) | 0 (0)       | 0 (0)                  | 0 (0)       | 0 (0)                    | 0 (0)               | 0 (0) |
| gastrointestinal_tract             | 1   | 0 (0)                        | 0 (0)    | 1 (1)    | 0 (0) | 0 (0)       | 0 (0)                  | 1 (1)       | 0 (0)                    | 0 (0)               | 0 (0) |
| haematopoietic_and_lymphoid_tissue | 124 | 0 (0)                        | 4 (0)    | 7 (0.1)  | 0 (0) | 0 (0)       | 1 (0)                  | 0 (0)       | 2 (0)                    | 0 (0)               | 0 (0) |
| kidney                             | 20  | 0 (0)                        | 0 (0)    | 4 (0.2)  | 0 (0) | 0 (0)       | 0 (0)                  | 0 (0)       | 0 (0)                    | 0 (0)               | 0 (0) |
| large_intestine                    | 36  | 0 (0)                        | 0 (0)    | 4 (0.1)  | 0 (0) | 0 (0)       | 1 (0)                  | 0 (0)       | 0 (0)                    | 0 (0)               | 0 (0) |
| liver                              | 8   | 0 (0)                        | 1 (0.1)  | 1 (0.1)  | 0 (0) | 0 (0)       | 0 (0)                  | 0 (0)       | 0 (0)                    | 0 (0)               | 0 (0) |
| lung                               | 145 | 1 (0)                        | 29 (0.2) | 49 (0.3) | 0 (0) | 0 (0)       | 0 (0)                  | 2 (0)       | 0 (0)                    | 0 (0)               | 0 (0) |
| oesophagus                         | 21  | 0 (0)                        | 2 (0.1)  | 6 (0.3)  | 0 (0) | 0 (0)       | 0 (0)                  | 0 (0)       | 0 (0)                    | 0 (0)               | 0 (0) |
| ovary                              | 22  | 0 (0)                        | 1 (0)    | 6 (0.3)  | 0 (0) | 0 (0)       | 0 (0)                  | 0 (0)       | 0 (0)                    | 0 (0)               | 0 (0) |
| pancreas                           | 17  | 0 (0)                        | 2 (0.1)  | 4 (0.2)  | 0 (0) | 0 (0)       | 0 (0)                  | 0 (0)       | 0 (0)                    | 0 (0)               | 0 (0) |
| placenta                           | 2   | 0 (0)                        | 0 (0)    | 1 (0.5)  | 0 (0) | 0 (0)       | 0 (0)                  | 0 (0)       | 0 (0)                    | 0 (0)               | 0 (0) |
| pleura                             | 5   | 0 (0)                        | 1 (0.2)  | 0 (0)    | 0 (0) | 0 (0)       | 0 (0)                  | 0 (0)       | 0 (0)                    | 0 (0)               | 0 (0) |
| prostate                           | 5   | 0 (0)                        | 0 (0)    | 0 (0)    | 0 (0) | 0 (0)       | 0 (0)                  | 0 (0)       | 0 (0)                    | 0 (0)               | 0 (0) |
| skin                               | 51  | 0 (0)                        | 1 (0)    | 1 (0)    | 0 (0) | 0 (0)       | 0 (0)                  | 0 (0)       | 0 (0)                    | 0 (0)               | 0 (0) |
| small_intestine                    | 1   | 0 (0)                        | 0 (0)    | 0 (0)    | 0 (0) | 0 (0)       | 0 (0)                  | 0 (0)       | 0 (0)                    | 0 (0)               | 0 (0) |
| soft_tissue                        | 19  | 0 (0)                        | 2 (0.1)  | 4 (0.2)  | 0 (0) | 0 (0)       | 0 (0)                  | 0 (0)       | 0 (0)                    | 0 (0)               | 0 (0) |
| stomach                            | 21  | 0 (0)                        | 0 (0)    | 3 (0.1)  | 0 (0) | 0 (0)       | 0 (0)                  | 0 (0)       | 0 (0)                    | 0 (0)               | 0 (0) |
| testis                             | 3   | 0 (0)                        | 0 (0)    | 2 (0.7)  | 0 (0) | 0 (0)       | 0 (0)                  | 0 (0)       | 0 (0)                    | 0 (0)               | 0 (0) |
| thyroid                            | 11  | 0 (0)                        | 1 (0.1)  | 5 (0.5)  | 0 (0) | 0 (0)       | 0 (0)                  | 0 (0)       | 0 (0)                    | 0 (0)               | 0 (0) |
| not specified                      | 1   | 0 (0)                        | 0 (0)    | 0 (0)    | 0 (0) | 0 (0)       | 0 (0)                  | 0 (0)       | 0 (0)                    | 0 (0)               | 0 (0) |
| upper_aerodigestive_tract          | 20  | 0 (0)                        | 1 (0.1)  | 4 (0.2)  | 0 (0) | 0 (0)       | 0 (0)                  | 0 (0)       | 0 (0)                    | 0 (0)               | 0 (0) |
| urinary_tract                      | 16  | 0 (0)                        | 1 (0.1)  | 1 (0.1)  | 0 (0) | 0 (0)       | 0 (0)                  | 0 (0)       | 0 (0)                    | 0 (0)               | 0 (0) |
| vulva                              | 3   | 0 (0)                        | 0 (0)    | 0 (0)    | 0 (0) | 0 (0)       | 0 (0)                  | 0 (0)       | 0 (0)                    | 0 (0)               | 0 (0) |

GNAS (KCG)

| Cancer Cell lines                  |     | Somatic hemizygous deletions |          |       |         | Somatic HDs | Somatic Amplifications | Breakpoints | Known Cancer Gene Screen |                     |       |
|------------------------------------|-----|------------------------------|----------|-------|---------|-------------|------------------------|-------------|--------------------------|---------------------|-------|
| Tissue                             | №   | <1Mb                         | >1Mb     | Arm   | Chr     |             |                        |             | Point Mutations LOM      | Point Mutations TOV | HDs   |
| adrenal_gland                      | 2   | 0 (0)                        | 0 (0)    | 0 (0) | 0 (0)   | 0 (0)       | 0 (0)                  | 0 (0)       | 0 (0)                    | 0 (0)               | 0 (0) |
| autonomic_ganglia                  | 36  | 0 (0)                        | 1 (0)    | 0 (0) | 1 (0)   | 0 (0)       | 0 (0)                  | 0 (0)       | 0 (0)                    | 0 (0)               | 0 (0) |
| biliary_tract                      | 6   | 0 (0)                        | 0 (0)    | 0 (0) | 0 (0)   | 0 (0)       | 0 (0)                  | 0 (0)       | 0 (0)                    | 0 (0)               | 0 (0) |
| bone                               | 32  | 0 (0)                        | 0 (0)    | 0 (0) | 2 (0.1) | 0 (0)       | 0 (0)                  | 0 (0)       | 0 (0)                    | 0 (0)               | 0 (0) |
| breast                             | 42  | 0 (0)                        | 5 (0.1)  | 1 (0) | 0 (0)   | 0 (0)       | 2 (0)                  | 0 (0)       | 0 (0)                    | 0 (0)               | 0 (0) |
| central_nervous_system             | 55  | 0 (0)                        | 1 (0)    | 0 (0) | 0 (0)   | 0 (0)       | 0 (0)                  | 0 (0)       | 0 (0)                    | 0 (0)               | 0 (0) |
| cervix                             | 11  | 0 (0)                        | 0 (0)    | 0 (0) | 1 (0.1) | 0 (0)       | 0 (0)                  | 0 (0)       | 0 (0)                    | 0 (0)               | 0 (0) |
| endometrium                        | 9   | 0 (0)                        | 1 (0.1)  | 0 (0) | 0 (0)   | 0 (0)       | 0 (0)                  | 0 (0)       | 0 (0)                    | 0 (0)               | 0 (0) |
| eye                                | 1   | 0 (0)                        | 0 (0)    | 0 (0) | 0 (0)   | 0 (0)       | 0 (0)                  | 0 (0)       | 0 (0)                    | 0 (0)               | 0 (0) |
| gastrointestinal_tract             | 1   | 0 (0)                        | 0 (0)    | 0 (0) | 0 (0)   | 0 (0)       | 0 (0)                  | 0 (0)       | 0 (0)                    | 0 (0)               | 0 (0) |
| haematopoietic_and_lymphoid_tissue | 124 | 0 (0)                        | 4 (0)    | 0 (0) | 2 (0)   | 0 (0)       | 0 (0)                  | 0 (0)       | 0 (0)                    | 0 (0)               | 0 (0) |
| kidney                             | 20  | 0 (0)                        | 0 (0)    | 0 (0) | 2 (0.1) | 0 (0)       | 0 (0)                  | 0 (0)       | 0 (0)                    | 0 (0)               | 0 (0) |
| large_intestine                    | 36  | 0 (0)                        | 0 (0)    | 0 (0) | 0 (0)   | 0 (0)       | 1 (0)                  | 0 (0)       | 1 (0)                    | 0 (0)               | 0 (0) |
| liver                              | 8   | 0 (0)                        | 0 (0)    | 0 (0) | 0 (0)   | 0 (0)       | 0 (0)                  | 0 (0)       | 0 (0)                    | 0 (0)               | 0 (0) |
| lung                               | 145 | 0 (0)                        | 13 (0.1) | 6 (0) | 5 (0)   | 0 (0)       | 0 (0)                  | 1 (0)       | 0 (0)                    | 0 (0)               | 0 (0) |
| oesophagus                         | 21  | 0 (0)                        | 2 (0.1)  | 1 (0) | 1 (0)   | 0 (0)       | 0 (0)                  | 0 (0)       | 0 (0)                    | 0 (0)               | 0 (0) |
| ovary                              | 22  | 0 (0)                        | 1 (0)    | 0 (0) | 1 (0)   | 0 (0)       | 0 (0)                  | 0 (0)       | 0 (0)                    | 0 (0)               | 0 (0) |
| pancreas                           | 17  | 0 (0)                        | 1 (0.1)  | 0 (0) | 1 (0.1) | 0 (0)       | 0 (0)                  | 0 (0)       | 0 (0)                    | 0 (0)               | 0 (0) |
| placenta                           | 2   | 0 (0)                        | 0 (0)    | 0 (0) | 0 (0)   | 0 (0)       | 0 (0)                  | 0 (0)       | 0 (0)                    | 0 (0)               | 0 (0) |
| pleura                             | 5   | 0 (0)                        | 0 (0)    | 0 (0) | 0 (0)   | 0 (0)       | 0 (0)                  | 0 (0)       | 0 (0)                    | 0 (0)               | 0 (0) |
| prostate                           | 5   | 0 (0)                        | 0 (0)    | 0 (0) | 0 (0)   | 0 (0)       | 0 (0)                  | 0 (0)       | 0 (0)                    | 0 (0)               | 0 (0) |
| skin                               | 51  | 0 (0)                        | 0 (0)    | 0 (0) | 1 (0)   | 0 (0)       | 0 (0)                  | 0 (0)       | 0 (0)                    | 0 (0)               | 0 (0) |
| small_intestine                    | 1   | 0 (0)                        | 0 (0)    | 0 (0) | 0 (0)   | 0 (0)       | 0 (0)                  | 0 (0)       | 0 (0)                    | 0 (0)               | 0 (0) |
| soft_tissue                        | 19  | 0 (0)                        | 0 (0)    | 0 (0) | 0 (0)   | 0 (0)       | 0 (0)                  | 0 (0)       | 0 (0)                    | 0 (0)               | 0 (0) |
| stomach                            | 21  | 0 (0)                        | 4 (0.2)  | 0 (0) | 1 (0)   | 0 (0)       | 0 (0)                  | 0 (0)       | 0 (0)                    | 0 (0)               | 0 (0) |
| testis                             | 3   | 0 (0)                        | 0 (0)    | 0 (0) | 0 (0)   | 0 (0)       | 0 (0)                  | 0 (0)       | 0 (0)                    | 0 (0)               | 0 (0) |
| thyroid                            | 11  | 0 (0)                        | 0 (0)    | 0 (0) | 0 (0)   | 0 (0)       | 0 (0)                  | 0 (0)       | 0 (0)                    | 0 (0)               | 0 (0) |
| not specified                      | 1   | 0 (0)                        | 0 (0)    | 0 (0) | 0 (0)   | 0 (0)       | 0 (0)                  | 0 (0)       | 0 (0)                    | 0 (0)               | 0 (0) |
| upper_aerodigestive_tract          | 20  | 0 (0)                        | 0 (0)    | 0 (0) | 0 (0)   | 0 (0)       | 0 (0)                  | 0 (0)       | 0 (0)                    | 0 (0)               | 0 (0) |
| urinary_tract                      | 16  | 0 (0)                        | 1 (0.1)  | 0 (0) | 0 (0)   | 0 (0)       | 0 (0)                  | 0 (0)       | 0 (0)                    | 0 (0)               | 0 (0) |
| vulva                              | 3   | 0 (0)                        | 0 (0)    | 0 (0) | 0 (0)   | 0 (0)       | 0 (0)                  | 0 (0)       | 0 (0)                    | 0 (0)               | 0 (0) |

HRAS (KCG)

| Cancer Cell lines                  |     | Somatic hemizygous deletions |          |         |         | Somatic HDs | Somatic Amplifications | Breakpoints | Known Cancer Gene Screen |                     |       |
|------------------------------------|-----|------------------------------|----------|---------|---------|-------------|------------------------|-------------|--------------------------|---------------------|-------|
| Tissue                             | №   | <1Mb                         | >1Mb     | Arm     | Chr     |             |                        |             | Point Mutations LOM      | Point Mutations TOV | HDs   |
| adrenal_gland                      | 2   | 0 (0)                        | 0 (0)    | 0 (0)   | 0 (0)   | 0 (0)       | 0 (0)                  | 0 (0)       | 0 (0)                    | 0 (0)               | 0 (0) |
| autonomic_ganglia                  | 36  | 0 (0)                        | 7 (0.2)  | 1 (0)   | 1 (0)   | 0 (0)       | 0 (0)                  | 0 (0)       | 0 (0)                    | 0 (0)               | 0 (0) |
| biliary_tract                      | 6   | 0 (0)                        | 0 (0)    | 1 (0.2) | 0 (0)   | 0 (0)       | 0 (0)                  | 0 (0)       | 0 (0)                    | 0 (0)               | 0 (0) |
| bone                               | 32  | 0 (0)                        | 7 (0.2)  | 1 (0)   | 3 (0.1) | 0 (0)       | 0 (0)                  | 0 (0)       | 0 (0)                    | 0 (0)               | 0 (0) |
| breast                             | 42  | 3 (0.1)                      | 9 (0.2)  | 1 (0)   | 0 (0)   | 0 (0)       | 0 (0)                  | 1 (0)       | 1 (0)                    | 0 (0)               | 0 (0) |
| central_nervous_system             | 55  | 1 (0)                        | 1 (0)    | 0 (0)   | 0 (0)   | 0 (0)       | 0 (0)                  | 1 (0)       | 0 (0)                    | 0 (0)               | 0 (0) |
| cervix                             | 11  | 0 (0)                        | 4 (0.4)  | 0 (0)   | 0 (0)   | 0 (0)       | 0 (0)                  | 0 (0)       | 0 (0)                    | 0 (0)               | 0 (0) |
| endometrium                        | 9   | 0 (0)                        | 0 (0)    | 0 (0)   | 0 (0)   | 0 (0)       | 0 (0)                  | 0 (0)       | 1 (0.1)                  | 0 (0)               | 0 (0) |
| eye                                | 1   | 0 (0)                        | 0 (0)    | 0 (0)   | 0 (0)   | 0 (0)       | 0 (0)                  | 0 (0)       | 0 (0)                    | 0 (0)               | 0 (0) |
| gastrointestinal_tract             | 1   | 0 (0)                        | 0 (0)    | 0 (0)   | 0 (0)   | 0 (0)       | 0 (0)                  | 0 (0)       | 0 (0)                    | 0 (0)               | 0 (0) |
| haematopoietic_and_lymphoid_tissue | 124 | 0 (0)                        | 5 (0)    | 0 (0)   | 0 (0)   | 0 (0)       | 0 (0)                  | 0 (0)       | 1 (0)                    | 0 (0)               | 0 (0) |
| kidney                             | 20  | 0 (0)                        | 0 (0)    | 0 (0)   | 1 (0.1) | 0 (0)       | 0 (0)                  | 0 (0)       | 0 (0)                    | 0 (0)               | 0 (0) |
| large_intestine                    | 36  | 2 (0.1)                      | 1 (0)    | 0 (0)   | 0 (0)   | 0 (0)       | 0 (0)                  | 0 (0)       | 0 (0)                    | 0 (0)               | 0 (0) |
| liver                              | 8   | 0 (0)                        | 1 (0.1)  | 0 (0)   | 0 (0)   | 0 (0)       | 0 (0)                  | 0 (0)       | 0 (0)                    | 0 (0)               | 0 (0) |
| lung                               | 145 | 1 (0)                        | 21 (0.1) | 3 (0)   | 3 (0)   | 0 (0)       | 0 (0)                  | 0 (0)       | 1 (0)                    | 0 (0)               | 0 (0) |
| oesophagus                         | 21  | 0 (0)                        | 5 (0.2)  | 0 (0)   | 0 (0)   | 0 (0)       | 0 (0)                  | 0 (0)       | 0 (0)                    | 0 (0)               | 0 (0) |
| ovary                              | 22  | 0 (0)                        | 3 (0.1)  | 1 (0)   | 0 (0)   | 0 (0)       | 0 (0)                  | 0 (0)       | 0 (0)                    | 0 (0)               | 0 (0) |
| pancreas                           | 17  | 0 (0)                        | 3 (0.2)  | 0 (0)   | 0 (0)   | 0 (0)       | 0 (0)                  | 0 (0)       | 0 (0)                    | 0 (0)               | 0 (0) |
| placenta                           | 2   | 0 (0)                        | 0 (0)    | 0 (0)   | 0 (0)   | 0 (0)       | 0 (0)                  | 0 (0)       | 0 (0)                    | 0 (0)               | 0 (0) |
| pleura                             | 5   | 0 (0)                        | 0 (0)    | 1 (0.2) | 0 (0)   | 0 (0)       | 0 (0)                  | 0 (0)       | 0 (0)                    | 0 (0)               | 0 (0) |
| prostate                           | 5   | 0 (0)                        | 1 (0.2)  | 0 (0)   | 0 (0)   | 0 (0)       | 0 (0)                  | 0 (0)       | 0 (0)                    | 0 (0)               | 0 (0) |
| skin                               | 51  | 0 (0)                        | 2 (0)    | 1 (0)   | 3 (0.1) | 0 (0)       | 0 (0)                  | 0 (0)       | 1 (0)                    | 0 (0)               | 0 (0) |
| small_intestine                    | 1   | 0 (0)                        | 0 (0)    | 0 (0)   | 0 (0)   | 0 (0)       | 0 (0)                  | 0 (0)       | 0 (0)                    | 0 (0)               | 0 (0) |
| soft_tissue                        | 19  | 0 (0)                        | 4 (0.2)  | 0 (0)   | 2 (0.1) | 0 (0)       | 0 (0)                  | 0 (0)       | 0 (0)                    | 0 (0)               | 0 (0) |
| stomach                            | 21  | 0 (0)                        | 3 (0.1)  | 0 (0)   | 0 (0)   | 0 (0)       | 0 (0)                  | 0 (0)       | 0 (0)                    | 0 (0)               | 0 (0) |
| testis                             | 3   | 0 (0)                        | 0 (0)    | 0 (0)   | 0 (0)   | 0 (0)       | 0 (0)                  | 0 (0)       | 0 (0)                    | 0 (0)               | 0 (0) |
| thyroid                            | 11  | 0 (0)                        | 0 (0)    | 0 (0)   | 1 (0.1) | 0 (0)       | 0 (0)                  | 0 (0)       | 0 (0)                    | 0 (0)               | 0 (0) |
| not specified                      | 1   | 0 (0)                        | 0 (0)    | 0 (0)   | 0 (0)   | 0 (0)       | 0 (0)                  | 0 (0)       | 0 (0)                    | 0 (0)               | 0 (0) |
| upper_aerodigestive_tract          | 20  | 0 (0)                        | 1 (0.1)  | 0 (0)   | 0 (0)   | 0 (0)       | 0 (0)                  | 0 (0)       | 1 (0.1)                  | 0 (0)               | 0 (0) |
| urinary_tract                      | 16  | 0 (0)                        | 2 (0.1)  | 0 (0)   | 0 (0)   | 0 (0)       | 0 (0)                  | 0 (0)       | 1 (0.1)                  | 0 (0)               | 0 (0) |
| vulva                              | 3   | 0 (0)                        | 0 (0)    | 0 (0)   | 0 (0)   | 0 (0)       | 0 (0)                  | 0 (0)       | 0 (0)                    | 0 (0)               | 0 (0) |

**JAK2 (KCG)**

| Cancer Cell lines                  |     | Somatic hemizygous deletions |          |         |          | Somatic HDs | Somatic Amplifications | Breakpoints | Known Cancer Gene Screen |                     |       |
|------------------------------------|-----|------------------------------|----------|---------|----------|-------------|------------------------|-------------|--------------------------|---------------------|-------|
| Tissue                             | №   | <1Mb                         | >1Mb     | Arm     | Chr      |             |                        |             | Point Mutations LOM      | Point Mutations TOV | HDs   |
| adrenal_gland                      | 2   | 0 (0)                        | 1 (0.5)  | 1 (0.5) | 0 (0)    | 0 (0)       | 0 (0)                  | 0 (0)       | 0 (0)                    | 0 (0)               | 0 (0) |
| autonomic_ganglia                  | 36  | 0 (0)                        | 6 (0.2)  | 0 (0)   | 0 (0)    | 0 (0)       | 0 (0)                  | 0 (0)       | 0 (0)                    | 0 (0)               | 0 (0) |
| biliary_tract                      | 6   | 0 (0)                        | 0 (0)    | 1 (0.2) | 2 (0.3)  | 0 (0)       | 0 (0)                  | 0 (0)       | 0 (0)                    | 0 (0)               | 0 (0) |
| bone                               | 32  | 0 (0)                        | 8 (0.3)  | 0 (0)   | 0 (0)    | 0 (0)       | 0 (0)                  | 2 (0.1)     | 0 (0)                    | 0 (0)               | 0 (0) |
| breast                             | 42  | 0 (0)                        | 7 (0.2)  | 1 (0)   | 3 (0.1)  | 0 (0)       | 1 (0)                  | 0 (0)       | 0 (0)                    | 0 (0)               | 0 (0) |
| central_nervous_system             | 55  | 0 (0)                        | 5 (0.1)  | 2 (0)   | 0 (0)    | 0 (0)       | 0 (0)                  | 0 (0)       | 0 (0)                    | 0 (0)               | 0 (0) |
| cervix                             | 11  | 0 (0)                        | 1 (0.1)  | 3 (0.3) | 1 (0.1)  | 0 (0)       | 0 (0)                  | 0 (0)       | 0 (0)                    | 0 (0)               | 0 (0) |
| endometrium                        | 9   | 0 (0)                        | 0 (0)    | 0 (0)   | 1 (0.1)  | 0 (0)       | 0 (0)                  | 0 (0)       | 0 (0)                    | 0 (0)               | 0 (0) |
| eye                                | 1   | 0 (0)                        | 0 (0)    | 0 (0)   | 2 (0.0)  | 0 (0)       | 0 (0)                  | 0 (0)       | 0 (0)                    | 0 (0)               | 0 (0) |
| gastrointestinal_tract             | 1   | 0 (0)                        | 1 (1)    | 0 (0)   | 0 (0)    | 0 (0)       | 0 (0)                  | 0 (0)       | 0 (0)                    | 0 (0)               | 0 (0) |
| haematopoietic_and_lymphoid_tissue | 124 | 0 (0)                        | 11 (0.1) | 2 (0)   | 1 (0)    | 0 (0)       | 0 (0)                  | 0 (0)       | 1 (0)                    | 0 (0)               | 0 (0) |
| kidney                             | 20  | 0 (0)                        | 1 (0.1)  | 2 (0.1) | 2 (0.1)  | 0 (0)       | 0 (0)                  | 0 (0)       | 0 (0)                    | 0 (0)               | 0 (0) |
| large_intestine                    | 36  | 1 (0)                        | 5 (0.1)  | 3 (0.1) | 2 (0.1)  | 0 (0)       | 0 (0)                  | 1 (0)       | 0 (0)                    | 0 (0)               | 0 (0) |
| liver                              | 8   | 0 (0)                        | 1 (0.1)  | 0 (0)   | 0 (0)    | 0 (0)       | 0 (0)                  | 0 (0)       | 0 (0)                    | 0 (0)               | 0 (0) |
| lung                               | 145 | 0 (0)                        | 12 (0.1) | 9 (0.1) | 19 (0.1) | 1 (0)       | 0 (0)                  | 3 (0)       | 0 (0)                    | 0 (0)               | 0 (0) |
| oesophagus                         | 21  | 0 (0)                        | 1 (0)    | 0 (0)   | 3 (0.1)  | 0 (0)       | 0 (0)                  | 0 (0)       | 0 (0)                    | 0 (0)               | 0 (0) |
| ovary                              | 22  | 0 (0)                        | 2 (0.1)  | 2 (0.1) | 2 (0.1)  | 0 (0)       | 0 (0)                  | 2 (0.1)     | 0 (0)                    | 0 (0)               | 0 (0) |
| pancreas                           | 17  | 0 (0)                        | 2 (0.1)  | 1 (0.1) | 3 (0.2)  | 0 (0)       | 0 (0)                  | 0 (0)       | 0 (0)                    | 0 (0)               | 0 (0) |
| placenta                           | 2   | 0 (0)                        | 0 (0)    | 0 (0)   | 0 (0)    | 0 (0)       | 0 (0)                  | 0 (0)       | 0 (0)                    | 0 (0)               | 0 (0) |
| pleura                             | 5   | 1 (0.2)                      | 1 (0.2)  | 0 (0)   | 0 (0)    | 0 (0)       | 0 (0)                  | 0 (0)       | 0 (0)                    | 0 (0)               | 0 (0) |
| prostate                           | 5   | 0 (0)                        | 1 (0.2)  | 1 (0.2) | 0 (0)    | 0 (0)       | 0 (0)                  | 0 (0)       | 0 (0)                    | 0 (0)               | 0 (0) |
| skin                               | 51  | 0 (0)                        | 6 (0.1)  | 8 (0.2) | 2 (0)    | 0 (0)       | 0 (0)                  | 0 (0)       | 0 (0)                    | 0 (0)               | 0 (0) |
| small_intestine                    | 1   | 0 (0)                        | 0 (0)    | 0 (0)   | 0 (0)    | 0 (0)       | 0 (0)                  | 0 (0)       | 0 (0)                    | 0 (0)               | 0 (0) |
| soft_tissue                        | 19  | 0 (0)                        | 1 (0.1)  | 1 (0.1) | 2 (0.1)  | 0 (0)       | 0 (0)                  | 0 (0)       | 0 (0)                    | 0 (0)               | 0 (0) |
| stomach                            | 21  | 0 (0)                        | 2 (0.1)  | 4 (0.2) | 0 (0)    | 0 (0)       | 0 (0)                  | 0 (0)       | 0 (0)                    | 0 (0)               | 0 (0) |
| testis                             | 3   | 0 (0)                        | 0 (0)    | 0 (0)   | 1 (0.3)  | 0 (0)       | 0 (0)                  | 0 (0)       | 0 (0)                    | 0 (0)               | 0 (0) |
| thyroid                            | 11  | 0 (0)                        | 1 (0.1)  | 0 (0)   | 2 (0.2)  | 0 (0)       | 0 (0)                  | 0 (0)       | 0 (0)                    | 0 (0)               | 0 (0) |
| not specified                      | 1   | 0 (0)                        | 1 (1)    | 0 (0)   | 0 (0)    | 0 (0)       | 0 (0)                  | 0 (0)       | 0 (0)                    | 0 (0)               | 0 (0) |
| upper_aerodigestive_tract          | 20  | 0 (0)                        | 2 (0.1)  | 3 (0.2) | 3 (0.2)  | 0 (0)       | 0 (0)                  | 0 (0)       | 0 (0)                    | 0 (0)               | 0 (0) |
| urinary_tract                      | 16  | 0 (0)                        | 0 (0)    | 0 (0)   | 1 (0.1)  | 0 (0)       | 0 (0)                  | 1 (0.1)     | 0 (0)                    | 0 (0)               | 0 (0) |
| vulva                              | 3   | 0 (0)                        | 1 (0.3)  | 0 (0)   | 0 (0)    | 0 (0)       | 0 (0)                  | 0 (0)       | 0 (0)                    | 0 (0)               | 0 (0) |

**KIT (KCG)**

| Cancer Cell lines                  |     | Somatic hemizygous deletions |          |         |         | Somatic HDs | Somatic Amplifications | Breakpoints | Known Cancer Gene Screen |                     |       |
|------------------------------------|-----|------------------------------|----------|---------|---------|-------------|------------------------|-------------|--------------------------|---------------------|-------|
| Tissue                             | №   | <1Mb                         | >1Mb     | Arm     | Chr     |             |                        |             | Point Mutations LOM      | Point Mutations TOV | HDs   |
| adrenal_gland                      | 2   | 0 (0)                        | 0 (0)    | 0 (0)   | 0 (0)   | 0 (0)       | 0 (0)                  | 0 (0)       | 0 (0)                    | 0 (0)               | 0 (0) |
| autonomic_ganglia                  | 36  | 0 (0)                        | 1 (0)    | 0 (0)   | 0 (0)   | 0 (0)       | 0 (0)                  | 0 (0)       | 0 (0)                    | 0 (0)               | 0 (0) |
| biliary_tract                      | 6   | 0 (0)                        | 0 (0)    | 0 (0)   | 0 (0)   | 0 (0)       | 0 (0)                  | 0 (0)       | 0 (0)                    | 0 (0)               | 0 (0) |
| bone                               | 32  | 0 (0)                        | 2 (0.1)  | 0 (0)   | 1 (0)   | 0 (0)       | 0 (0)                  | 1 (0)       | 0 (0)                    | 0 (0)               | 0 (0) |
| breast                             | 42  | 0 (0)                        | 3 (0.1)  | 0 (0)   | 4 (0.1) | 0 (0)       | 0 (0)                  | 0 (0)       | 0 (0)                    | 0 (0)               | 0 (0) |
| central_nervous_system             | 55  | 0 (0)                        | 2 (0)    | 1 (0)   | 1 (0)   | 0 (0)       | 0 (0)                  | 2 (0)       | 0 (0)                    | 0 (0)               | 0 (0) |
| cervix                             | 11  | 0 (0)                        | 1 (0.1)  | 0 (0)   | 1 (0.1) | 0 (0)       | 0 (0)                  | 0 (0)       | 0 (0)                    | 0 (0)               | 0 (0) |
| endometrium                        | 9   | 0 (0)                        | 0 (0)    | 0 (0)   | 0 (0)   | 0 (0)       | 0 (0)                  | 0 (0)       | 0 (0)                    | 0 (0)               | 0 (0) |
| eye                                | 1   | 0 (0)                        | 0 (0)    | 0 (0)   | 0 (0)   | 0 (0)       | 0 (0)                  | 0 (0)       | 0 (0)                    | 0 (0)               | 0 (0) |
| gastrointestinal_tract             | 1   | 0 (0)                        | 0 (0)    | 0 (0)   | 0 (0)   | 0 (0)       | 0 (0)                  | 0 (0)       | 0 (0)                    | 0 (0)               | 0 (0) |
| haematopoietic_and_lymphoid_tissue | 124 | 0 (0)                        | 5 (0)    | 0 (0)   | 0 (0)   | 0 (0)       | 0 (0)                  | 0 (0)       | 0 (0)                    | 0 (0)               | 0 (0) |
| kidney                             | 20  | 0 (0)                        | 0 (0)    | 2 (0.1) | 1 (0.1) | 0 (0)       | 0 (0)                  | 0 (0)       | 0 (0)                    | 0 (0)               | 0 (0) |
| large_intestine                    | 36  | 1 (0)                        | 2 (0.1)  | 0 (0)   | 1 (0)   | 0 (0)       | 0 (0)                  | 1 (0)       | 0 (0)                    | 0 (0)               | 0 (0) |
| liver                              | 8   | 0 (0)                        | 0 (0)    | 0 (0)   | 0 (0)   | 0 (0)       | 0 (0)                  | 0 (0)       | 0 (0)                    | 0 (0)               | 0 (0) |
| lung                               | 145 | 0 (0)                        | 12 (0.1) | 3 (0)   | 2 (0)   | 0 (0)       | 3 (0)                  | 0 (0)       | 0 (0)                    | 0 (0)               | 0 (0) |
| oesophagus                         | 21  | 0 (0)                        | 1 (0)    | 0 (0)   | 1 (0)   | 0 (0)       | 0 (0)                  | 0 (0)       | 0 (0)                    | 0 (0)               | 0 (0) |
| ovary                              | 22  | 0 (0)                        | 0 (0)    | 0 (0)   | 0 (0)   | 0 (0)       | 0 (0)                  | 0 (0)       | 0 (0)                    | 0 (0)               | 0 (0) |
| pancreas                           | 17  | 0 (0)                        | 0 (0)    | 0 (0)   | 1 (0.1) | 0 (0)       | 0 (0)                  | 0 (0)       | 0 (0)                    | 0 (0)               | 0 (0) |
| placenta                           | 2   | 0 (0)                        | 0 (0)    | 0 (0)   | 0 (0)   | 0 (0)       | 0 (0)                  | 0 (0)       | 0 (0)                    | 0 (0)               | 0 (0) |
| pleura                             | 5   | 0 (0)                        | 1 (0.2)  | 1 (0.2) | 0 (0)   | 0 (0)       | 0 (0)                  | 0 (0)       | 0 (0)                    | 0 (0)               | 0 (0) |
| prostate                           | 5   | 0 (0)                        | 0 (0)    | 0 (0)   | 0 (0)   | 0 (0)       | 0 (0)                  | 0 (0)       | 0 (0)                    | 0 (0)               | 0 (0) |
| skin                               | 51  | 0 (0)                        | 1 (0)    | 0 (0)   | 2 (0)   | 0 (0)       | 0 (0)                  | 0 (0)       | 0 (0)                    | 0 (0)               | 0 (0) |
| small_intestine                    | 1   | 0 (0)                        | 0 (0)    | 0 (0)   | 0 (0)   | 0 (0)       | 0 (0)                  | 0 (0)       | 0 (0)                    | 0 (0)               | 0 (0) |
| soft_tissue                        | 19  | 0 (0)                        | 1 (0.1)  | 0 (0)   | 1 (0.1) | 0 (0)       | 0 (0)                  | 0 (0)       | 0 (0)                    | 0 (0)               | 0 (0) |
| stomach                            | 21  | 0 (0)                        | 2 (0.1)  | 1 (0)   | 0 (0)   | 0 (0)       | 0 (0)                  | 1 (0)       | 0 (0)                    | 0 (0)               | 0 (0) |
| testis                             | 3   | 0 (0)                        | 0 (0)    | 0 (0)   | 0 (0)   | 0 (0)       | 0 (0)                  | 0 (0)       | 0 (0)                    | 0 (0)               | 0 (0) |
| thyroid                            | 11  | 0 (0)                        | 1 (0.1)  | 0 (0)   | 0 (0)   | 0 (0)       | 0 (0)                  | 0 (0)       | 0 (0)                    | 0 (0)               | 0 (0) |
| not specified                      | 1   | 0 (0)                        | 0 (0)    | 0 (0)   | 0 (0)   | 0 (0)       | 0 (0)                  | 0 (0)       | 0 (0)                    | 0 (0)               | 0 (0) |
| upper_aerodigestive_tract          | 20  | 0 (0)                        | 1 (0.1)  | 1 (0.1) | 0 (0)   | 0 (0)       | 0 (0)                  | 0 (0)       | 0 (0)                    | 0 (0)               | 0 (0) |
| urinary_tract                      | 16  | 0 (0)                        | 0 (0)    | 0 (0)   | 0 (0)   | 0 (0)       | 0 (0)                  | 0 (0)       | 0 (0)                    | 0 (0)               | 0 (0) |
| vulva                              | 3   | 0 (0)                        | 1 (0.3)  | 0 (0)   | 0 (0)   | 0 (0)       | 0 (0)                  | 0 (0)       | 0 (0)                    | 0 (0)               | 0 (0) |

KRAS (KCG)

| Cancer Cell lines                  |     | Somatic hemizygous deletions |          |         |         | Somatic HDs | Somatic Amplifications | Breakpoints | Known Cancer Gene Screen |                     |       |
|------------------------------------|-----|------------------------------|----------|---------|---------|-------------|------------------------|-------------|--------------------------|---------------------|-------|
| Tissue                             | №   | <1Mb                         | >1Mb     | Arm     | Chr     |             |                        |             | Point Mutations LOM      | Point Mutations TOV | HDs   |
| adrenal_gland                      | 2   | 0 (0)                        | 0 (0)    | 0 (0)   | 0 (0)   | 0 (0)       | 0 (0)                  | 0 (0)       | 0 (0)                    | 0 (0)               | 0 (0) |
| autonomic_ganglia                  | 36  | 0 (0)                        | 0 (0)    | 0 (0)   | 0 (0)   | 0 (0)       | 0 (0)                  | 0 (0)       | 2 (0.1)                  | 0 (0)               | 0 (0) |
| biliary_tract                      | 6   | 0 (0)                        | 0 (0)    | 0 (0)   | 1 (0.2) | 0 (0)       | 0 (0)                  | 0 (0)       | 2 (0.3)                  | 0 (0)               | 0 (0) |
| bone                               | 32  | 0 (0)                        | 0 (0)    | 0 (0)   | 1 (0)   | 0 (0)       | 0 (0)                  | 0 (0)       | 0 (0)                    | 0 (0)               | 0 (0) |
| breast                             | 42  | 0 (0)                        | 3 (0.1)  | 1 (0)   | 2 (0)   | 0 (0)       | 0 (0)                  | 0 (0)       | 1 (0)                    | 0 (0)               | 0 (0) |
| central_nervous_system             | 55  | 0 (0)                        | 0 (0)    | 0 (0)   | 1 (0)   | 0 (0)       | 0 (0)                  | 0 (0)       | 0 (0)                    | 0 (0)               | 0 (0) |
| cervix                             | 11  | 0 (0)                        | 1 (0.1)  | 0 (0)   | 1 (0.1) | 0 (0)       | 0 (0)                  | 0 (0)       | 0 (0)                    | 0 (0)               | 0 (0) |
| endometrium                        | 9   | 0 (0)                        | 0 (0)    | 0 (0)   | 0 (0)   | 0 (0)       | 1 (0.1)                | 0 (0)       | 2 (0.2)                  | 0 (0)               | 0 (0) |
| eye                                | 1   | 0 (0)                        | 0 (0)    | 0 (0)   | 0 (0)   | 0 (0)       | 0 (0)                  | 0 (0)       | 0 (0)                    | 0 (0)               | 0 (0) |
| gastrointestinal_tract             | 1   | 0 (0)                        | 0 (0)    | 0 (0)   | 0 (0)   | 0 (0)       | 0 (0)                  | 0 (0)       | 1 (1)                    | 0 (0)               | 0 (0) |
| haematopoietic_and_lymphoid_tissue | 124 | 0 (0)                        | 6 (0)    | 1 (0)   | 1 (0)   | 0 (0)       | 0 (0)                  | 1 (0)       | 5 (0)                    | 0 (0)               | 0 (0) |
| kidney                             | 20  | 0 (0)                        | 0 (0)    | 0 (0)   | 1 (0.1) | 0 (0)       | 0 (0)                  | 0 (0)       | 0 (0)                    | 0 (0)               | 0 (0) |
| large_intestine                    | 36  | 0 (0)                        | 2 (0.1)  | 0 (0)   | 0 (0)   | 0 (0)       | 1 (0)                  | 0 (0)       | 19 (0.5)                 | 0 (0)               | 0 (0) |
| liver                              | 8   | 0 (0)                        | 1 (0.1)  | 0 (0)   | 0 (0)   | 0 (0)       | 0 (0)                  | 0 (0)       | 0 (0)                    | 0 (0)               | 0 (0) |
| lung                               | 145 | 1 (0)                        | 16 (0.1) | 2 (0)   | 7 (0)   | 0 (0)       | 6 (0)                  | 2 (0)       | 31 (0.2)                 | 0 (0)               | 0 (0) |
| oesophagus                         | 21  | 0 (0)                        | 1 (0)    | 0 (0)   | 0 (0)   | 0 (0)       | 0 (0)                  | 0 (0)       | 1 (0)                    | 0 (0)               | 0 (0) |
| ovary                              | 22  | 0 (0)                        | 1 (0)    | 0 (0)   | 1 (0)   | 0 (0)       | 1 (0)                  | 0 (0)       | 2 (0.1)                  | 0 (0)               | 0 (0) |
| pancreas                           | 17  | 0 (0)                        | 0 (0)    | 0 (0)   | 1 (0.1) | 0 (0)       | 1 (0.1)                | 1 (0.1)     | 16 (0.9)                 | 0 (0)               | 0 (0) |
| placenta                           | 2   | 0 (0)                        | 0 (0)    | 0 (0)   | 0 (0)   | 0 (0)       | 0 (0)                  | 0 (0)       | 0 (0)                    | 0 (0)               | 0 (0) |
| pleura                             | 5   | 0 (0)                        | 0 (0)    | 0 (0)   | 0 (0)   | 0 (0)       | 0 (0)                  | 0 (0)       | 0 (0)                    | 0 (0)               | 0 (0) |
| prostate                           | 5   | 0 (0)                        | 0 (0)    | 0 (0)   | 0 (0)   | 0 (0)       | 0 (0)                  | 0 (0)       | 0 (0)                    | 0 (0)               | 0 (0) |
| skin                               | 51  | 0 (0)                        | 1 (0)    | 1 (0)   | 0 (0)   | 0 (0)       | 1 (0)                  | 0 (0)       | 0 (0)                    | 0 (0)               | 0 (0) |
| small_intestine                    | 1   | 0 (0)                        | 0 (0)    | 0 (0)   | 0 (0)   | 0 (0)       | 0 (0)                  | 0 (0)       | 0 (0)                    | 0 (0)               | 0 (0) |
| soft_tissue                        | 19  | 0 (0)                        | 2 (0.1)  | 0 (0)   | 1 (0.1) | 0 (0)       | 0 (0)                  | 1 (0.1)     | 0 (0)                    | 0 (0)               | 0 (0) |
| stomach                            | 21  | 0 (0)                        | 2 (0.1)  | 0 (0)   | 0 (0)   | 0 (0)       | 1 (0)                  | 0 (0)       | 3 (0.1)                  | 0 (0)               | 0 (0) |
| testis                             | 3   | 0 (0)                        | 0 (0)    | 0 (0)   | 0 (0)   | 0 (0)       | 0 (0)                  | 0 (0)       | 0 (0)                    | 0 (0)               | 0 (0) |
| thyroid                            | 11  | 0 (0)                        | 1 (0.1)  | 0 (0)   | 1 (0.1) | 0 (0)       | 0 (0)                  | 1 (0.1)     | 1 (0.1)                  | 0 (0)               | 0 (0) |
| not specified                      | 1   | 0 (0)                        | 0 (0)    | 0 (0)   | 0 (0)   | 0 (0)       | 0 (0)                  | 0 (0)       | 0 (0)                    | 0 (0)               | 0 (0) |
| upper_aerodigestive_tract          | 20  | 0 (0)                        | 1 (0.1)  | 1 (0.1) | 0 (0)   | 0 (0)       | 1 (0.1)                | 1 (0.1)     | 0 (0)                    | 0 (0)               | 0 (0) |
| urinary_tract                      | 16  | 0 (0)                        | 4 (0.3)  | 0 (0)   | 0 (0)   | 0 (0)       | 0 (0)                  | 0 (0)       | 1 (0.1)                  | 0 (0)               | 0 (0) |
| vulva                              | 3   | 0 (0)                        | 0 (0)    | 0 (0)   | 0 (0)   | 0 (0)       | 0 (0)                  | 0 (0)       | 0 (0)                    | 0 (0)               | 0 (0) |

MAP2K4 (KCG)

| Cancer Cell lines                  |     | Somatic hemizygous deletions |          |          |          | Somatic HDs | Somatic Amplifications | Breakpoints | Known Cancer Gene Screen |                     |         |
|------------------------------------|-----|------------------------------|----------|----------|----------|-------------|------------------------|-------------|--------------------------|---------------------|---------|
| Tissue                             | №   | <1Mb                         | >1Mb     | Arm      | Chr      |             |                        |             | Point Mutations LOM      | Point Mutations TOV | HDs     |
| adrenal_gland                      | 2   | 0 (0)                        | 0 (0)    | 0 (0)    | 1 (0.5)  | 0 (0)       | 0 (0)                  | 0 (0)       | 0 (0)                    | 0 (0)               | 0 (0)   |
| autonomic_ganglia                  | 36  | 0 (0)                        | 9 (0.3)  | 3 (0.1)  | 1 (0)    | 0 (0)       | 0 (0)                  | 0 (0)       | 0 (0)                    | 0 (0)               | 0 (0)   |
| biliary_tract                      | 6   | 0 (0)                        | 1 (0.2)  | 3 (0.5)  | 0 (0)    | 0 (0)       | 0 (0)                  | 0 (0)       | 0 (0)                    | 0 (0)               | 0 (0)   |
| bone                               | 32  | 0 (0)                        | 6 (0.2)  | 1 (0)    | 5 (0.2)  | 0 (0)       | 0 (0)                  | 1 (0)       | 0 (0)                    | 0 (0)               | 0 (0)   |
| breast                             | 42  | 0 (0)                        | 9 (0.2)  | 8 (0.2)  | 8 (0.2)  | 2 (0)       | 0 (0)                  | 0 (0)       | 0 (0)                    | 1 (0)               | 2 (0)   |
| central_nervous_system             | 55  | 0 (0)                        | 16 (0.3) | 2 (0)    | 9 (0.2)  | 0 (0)       | 0 (0)                  | 0 (0)       | 0 (0)                    | 0 (0)               | 1 (0)   |
| cervix                             | 11  | 0 (0)                        | 1 (0.1)  | 0 (0)    | 1 (0.1)  | 0 (0)       | 0 (0)                  | 0 (0)       | 0 (0)                    | 0 (0)               | 0 (0)   |
| endometrium                        | 9   | 0 (0)                        | 0 (0)    | 1 (0.1)  | 0 (0)    | 1 (0.1)     | 0 (0)                  | 1 (0.1)     | 0 (0)                    | 0 (0)               | 1 (0.1) |
| eye                                | 1   | 0 (0)                        | 0 (0)    | 0 (0)    | 0 (0)    | 0 (0)       | 0 (0)                  | 0 (0)       | 0 (0)                    | 0 (0)               | 0 (0)   |
| gastrointestinal_tract             | 1   | 0 (0)                        | 0 (0)    | 0 (0)    | 0 (0)    | 0 (0)       | 0 (0)                  | 0 (0)       | 0 (0)                    | 0 (0)               | 0 (0)   |
| haematopoietic_and_lymphoid_tissue | 124 | 0 (0)                        | 16 (0.1) | 13 (0.1) | 3 (0)    | 0 (0)       | 0 (0)                  | 0 (0)       | 0 (0)                    | 0 (0)               | 0 (0)   |
| kidney                             | 20  | 0 (0)                        | 1 (0.1)  | 3 (0.2)  | 3 (0.2)  | 0 (0)       | 0 (0)                  | 0 (0)       | 0 (0)                    | 0 (0)               | 0 (0)   |
| large_intestine                    | 36  | 0 (0)                        | 7 (0.2)  | 8 (0.2)  | 4 (0.1)  | 1 (0)       | 0 (0)                  | 1 (0)       | 1 (0)                    | 1 (0)               | 2 (0.1) |
| liver                              | 8   | 0 (0)                        | 3 (0.4)  | 1 (0.1)  | 0 (0)    | 0 (0)       | 0 (0)                  | 0 (0)       | 0 (0)                    | 0 (0)               | 0 (0)   |
| lung                               | 145 | 0 (0)                        | 28 (0.2) | 54 (0.4) | 15 (0.1) | 2 (0)       | 0 (0)                  | 2 (0)       | 1 (0)                    | 0 (0)               | 3 (0)   |
| oesophagus                         | 21  | 0 (0)                        | 6 (0.3)  | 2 (0.1)  | 4 (0.2)  | 0 (0)       | 0 (0)                  | 1 (0)       | 0 (0)                    | 0 (0)               | 0 (0)   |
| ovary                              | 22  | 0 (0)                        | 3 (0.1)  | 1 (0)    | 5 (0.2)  | 1 (0)       | 0 (0)                  | 0 (0)       | 0 (0)                    | 0 (0)               | 1 (0)   |
| pancreas                           | 17  | 0 (0)                        | 3 (0.2)  | 6 (0.4)  | 1 (0.1)  | 1 (0.1)     | 0 (0)                  | 1 (0.1)     | 0 (0)                    | 1 (0.1)             | 2 (0.1) |
| placenta                           | 2   | 0 (0)                        | 0 (0)    | 0 (0)    | 0 (0)    | 0 (0)       | 0 (0)                  | 0 (0)       | 0 (0)                    | 0 (0)               | 0 (0)   |
| pleura                             | 5   | 0 (0)                        | 0 (0)    | 0 (0)    | 1 (0.2)  | 0 (0)       | 0 (0)                  | 0 (0)       | 0 (0)                    | 0 (0)               | 0 (0)   |
| prostate                           | 5   | 0 (0)                        | 0 (0)    | 0 (0)    | 0 (0)    | 0 (0)       | 0 (0)                  | 0 (0)       | 0 (0)                    | 0 (0)               | 0 (0)   |
| skin                               | 51  | 0 (0)                        | 7 (0.1)  | 6 (0.1)  | 3 (0.1)  | 0 (0)       | 0 (0)                  | 0 (0)       | 0 (0)                    | 0 (0)               | 0 (0)   |
| small_intestine                    | 1   | 0 (0)                        | 0 (0)    | 0 (0)    | 0 (0)    | 0 (0)       | 0 (0)                  | 0 (0)       | 0 (0)                    | 0 (0)               | 0 (0)   |
| soft_tissue                        | 19  | 0 (0)                        | 0 (0)    | 3 (0.2)  | 2 (0.1)  | 0 (0)       | 1 (0.1)                | 1 (0.1)     | 0 (0)                    | 0 (0)               | 0 (0)   |
| stomach                            | 21  | 0 (0)                        | 4 (0.2)  | 4 (0.2)  | 2 (0.1)  | 0 (0)       | 0 (0)                  | 1 (0)       | 0 (0)                    | 0 (0)               | 0 (0)   |
| testis                             | 3   | 0 (0)                        | 1 (0.3)  | 0 (0)    | 0 (0)    | 0 (0)       | 0 (0)                  | 0 (0)       | 0 (0)                    | 0 (0)               | 0 (0)   |
| thyroid                            | 11  | 0 (0)                        | 0 (0)    | 3 (0.3)  | 4 (0.4)  | 0 (0)       | 0 (0)                  | 0 (0)       | 0 (0)                    | 0 (0)               | 0 (0)   |
| not specified                      | 1   | 0 (0)                        | 0 (0)    | 0 (0)    | 0 (0)    | 0 (0)       | 0 (0)                  | 0 (0)       | 0 (0)                    | 0 (0)               | 0 (0)   |
| upper_aerodigestive_tract          | 20  | 0 (0)                        | 4 (0.2)  | 5 (0.3)  | 1 (0.1)  | 0 (0)       | 0 (0)                  | 0 (0)       | 0 (0)                    | 0 (0)               | 0 (0)   |
| urinary_tract                      | 16  | 0 (0)                        | 4 (0.3)  | 3 (0.2)  | 0 (0)    | 0 (0)       | 0 (0)                  | 0 (0)       | 0 (0)                    | 0 (0)               | 1 (0.1) |
| vulva                              | 3   | 0 (0)                        | 2 (0.7)  | 0 (0)    | 0 (0)    | 0 (0)       | 0 (0)                  | 0 (0)       | 0 (0)                    | 0 (0)               | 0 (0)   |

**MLH1 (KCG)**

| Cancer Cell lines                  |     | Somatic hemizygous deletions |          |          |         | Somatic HDs | Somatic Amplifications | Breakpoints | Known Cancer Gene Screen |                     |       |
|------------------------------------|-----|------------------------------|----------|----------|---------|-------------|------------------------|-------------|--------------------------|---------------------|-------|
| Tissue                             | №   | <1Mb                         | >1Mb     | Arm      | Chr     |             |                        |             | Point Mutations LOM      | Point Mutations TOV | HDs   |
| adrenal_gland                      | 2   | 0 (0)                        | 0 (0)    | 0 (0)    | 0 (0)   | 0 (0)       | 0 (0)                  | 0 (0)       | 0 (0)                    | 0 (0)               | 0 (0) |
| autonomic_ganglia                  | 36  | 0 (0)                        | 9 (0.3)  | 3 (0.1)  | 0 (0)   | 1 (0)       | 0 (0)                  | 0 (0)       | 0 (0)                    | 0 (0)               | 1 (0) |
| biliary_tract                      | 6   | 0 (0)                        | 0 (0)    | 1 (0.2)  | 0 (0)   | 0 (0)       | 0 (0)                  | 0 (0)       | 0 (0)                    | 0 (0)               | 0 (0) |
| bone                               | 32  | 0 (0)                        | 6 (0.2)  | 0 (0)    | 1 (0)   | 0 (0)       | 0 (0)                  | 0 (0)       | 0 (0)                    | 0 (0)               | 0 (0) |
| breast                             | 42  | 0 (0)                        | 7 (0.2)  | 0 (0)    | 0 (0)   | 0 (0)       | 0 (0)                  | 0 (0)       | 0 (0)                    | 0 (0)               | 0 (0) |
| central_nervous_system             | 55  | 1 (0)                        | 3 (0.1)  | 1 (0)    | 1 (0)   | 0 (0)       | 0 (0)                  | 0 (0)       | 0 (0)                    | 0 (0)               | 0 (0) |
| cervix                             | 11  | 0 (0)                        | 0 (0)    | 1 (0.1)  | 1 (0.1) | 0 (0)       | 0 (0)                  | 0 (0)       | 0 (0)                    | 0 (0)               | 0 (0) |
| endometrium                        | 9   | 0 (0)                        | 0 (0)    | 0 (0)    | 0 (0)   | 0 (0)       | 0 (0)                  | 0 (0)       | 0 (0)                    | 0 (0)               | 0 (0) |
| eye                                | 1   | 0 (0)                        | 0 (0)    | 0 (0)    | 0 (0)   | 0 (0)       | 0 (0)                  | 0 (0)       | 0 (0)                    | 0 (0)               | 0 (0) |
| gastrointestinal_tract             | 1   | 0 (0)                        | 0 (0)    | 1 (1)    | 0 (0)   | 0 (0)       | 0 (0)                  | 0 (0)       | 0 (0)                    | 0 (0)               | 0 (0) |
| haematopoietic_and_lymphoid_tissue | 124 | 1 (0)                        | 5 (0)    | 0 (0)    | 1 (0)   | 0 (0)       | 0 (0)                  | 0 (0)       | 5 (0)                    | 0 (0)               | 0 (0) |
| kidney                             | 20  | 1 (0.1)                      | 5 (0.3)  | 1 (0.1)  | 0 (0)   | 0 (0)       | 0 (0)                  | 0 (0)       | 0 (0)                    | 0 (0)               | 0 (0) |
| large_intestine                    | 36  | 0 (0)                        | 4 (0.1)  | 0 (0)    | 1 (0)   | 0 (0)       | 0 (0)                  | 0 (0)       | 2 (0.1)                  | 2 (0.1)             | 0 (0) |
| liver                              | 8   | 0 (0)                        | 2 (0.3)  | 0 (0)    | 0 (0)   | 0 (0)       | 0 (0)                  | 0 (0)       | 0 (0)                    | 0 (0)               | 0 (0) |
| lung                               | 145 | 0 (0)                        | 20 (0.1) | 23 (0.2) | 6 (0)   | 0 (0)       | 0 (0)                  | 0 (0)       | 0 (0)                    | 0 (0)               | 0 (0) |
| oesophagus                         | 21  | 0 (0)                        | 2 (0.1)  | 4 (0.2)  | 0 (0)   | 0 (0)       | 0 (0)                  | 0 (0)       | 0 (0)                    | 0 (0)               | 0 (0) |
| ovary                              | 22  | 0 (0)                        | 4 (0.2)  | 0 (0)    | 0 (0)   | 1 (0)       | 0 (0)                  | 1 (0)       | 1 (0)                    | 0 (0)               | 1 (0) |
| pancreas                           | 17  | 0 (0)                        | 0 (0)    | 1 (0.1)  | 0 (0)   | 0 (0)       | 0 (0)                  | 0 (0)       | 0 (0)                    | 0 (0)               | 0 (0) |
| placenta                           | 2   | 0 (0)                        | 0 (0)    | 0 (0)    | 0 (0)   | 0 (0)       | 0 (0)                  | 0 (0)       | 0 (0)                    | 0 (0)               | 0 (0) |
| pleura                             | 5   | 0 (0)                        | 1 (0.2)  | 0 (0)    | 0 (0)   | 0 (0)       | 0 (0)                  | 0 (0)       | 0 (0)                    | 0 (0)               | 0 (0) |
| prostate                           | 5   | 0 (0)                        | 2 (0.4)  | 0 (0)    | 0 (0)   | 0 (0)       | 0 (0)                  | 0 (0)       | 1 (0.2)                  | 0 (0)               | 0 (0) |
| skin                               | 51  | 0 (0)                        | 7 (0.1)  | 3 (0.1)  | 0 (0)   | 0 (0)       | 0 (0)                  | 0 (0)       | 0 (0)                    | 0 (0)               | 0 (0) |
| small_intestine                    | 1   | 0 (0)                        | 0 (0)    | 0 (0)    | 0 (0)   | 0 (0)       | 0 (0)                  | 0 (0)       | 0 (0)                    | 0 (0)               | 0 (0) |
| soft_tissue                        | 19  | 0 (0)                        | 2 (0.1)  | 0 (0)    | 0 (0)   | 0 (0)       | 0 (0)                  | 0 (0)       | 0 (0)                    | 0 (0)               | 0 (0) |
| stomach                            | 21  | 0 (0)                        | 2 (0.1)  | 0 (0)    | 1 (0)   | 0 (0)       | 0 (0)                  | 0 (0)       | 1 (0)                    | 0 (0)               | 0 (0) |
| testis                             | 3   | 0 (0)                        | 1 (0.3)  | 0 (0)    | 0 (0)   | 0 (0)       | 0 (0)                  | 0 (0)       | 0 (0)                    | 0 (0)               | 0 (0) |
| thyroid                            | 11  | 0 (0)                        | 0 (0)    | 0 (0)    | 1 (0.1) | 0 (0)       | 0 (0)                  | 0 (0)       | 0 (0)                    | 0 (0)               | 0 (0) |
| not specified                      | 1   | 0 (0)                        | 0 (0)    | 0 (0)    | 0 (0)   | 0 (0)       | 0 (0)                  | 0 (0)       | 0 (0)                    | 0 (0)               | 0 (0) |
| upper_aerodigestive_tract          | 20  | 0 (0)                        | 0 (0)    | 3 (0.2)  | 0 (0)   | 0 (0)       | 0 (0)                  | 0 (0)       | 0 (0)                    | 0 (0)               | 0 (0) |
| urinary_tract                      | 16  | 0 (0)                        | 0 (0)    | 0 (0)    | 0 (0)   | 0 (0)       | 0 (0)                  | 0 (0)       | 0 (0)                    | 0 (0)               | 0 (0) |
| vulva                              | 3   | 0 (0)                        | 0 (0)    | 0 (0)    | 0 (0)   | 0 (0)       | 0 (0)                  | 0 (0)       | 0 (0)                    | 0 (0)               | 0 (0) |

**MSH2 (KCG)**

| Cancer Cell lines                  |     | Somatic hemizygous deletions |         |         |         | Somatic HDs | Somatic Amplifications | Breakpoints | Known Cancer Gene Screen |                     |         |
|------------------------------------|-----|------------------------------|---------|---------|---------|-------------|------------------------|-------------|--------------------------|---------------------|---------|
| Tissue                             | №   | <1Mb                         | >1Mb    | Arm     | Chr     |             |                        |             | Point Mutations LOM      | Point Mutations TOV | HDs     |
| adrenal_gland                      | 2   | 0 (0)                        | 0 (0)   | 0 (0)   | 0 (0)   | 0 (0)       | 0 (0)                  | 0 (0)       | 0 (0)                    | 0 (0)               | 0 (0)   |
| autonomic_ganglia                  | 36  | 0 (0)                        | 0 (0)   | 0 (0)   | 0 (0)   | 0 (0)       | 0 (0)                  | 0 (0)       | 0 (0)                    | 0 (0)               | 0 (0)   |
| biliary_tract                      | 6   | 0 (0)                        | 1 (0.2) | 0 (0)   | 0 (0)   | 0 (0)       | 0 (0)                  | 0 (0)       | 0 (0)                    | 0 (0)               | 0 (0)   |
| bone                               | 32  | 0 (0)                        | 1 (0)   | 0 (0)   | 0 (0)   | 0 (0)       | 0 (0)                  | 0 (0)       | 0 (0)                    | 0 (0)               | 0 (0)   |
| breast                             | 42  | 0 (0)                        | 2 (0)   | 1 (0)   | 0 (0)   | 0 (0)       | 0 (0)                  | 0 (0)       | 0 (0)                    | 0 (0)               | 0 (0)   |
| central_nervous_system             | 55  | 0 (0)                        | 1 (0)   | 0 (0)   | 0 (0)   | 0 (0)       | 0 (0)                  | 0 (0)       | 0 (0)                    | 0 (0)               | 0 (0)   |
| cervix                             | 11  | 0 (0)                        | 0 (0)   | 0 (0)   | 0 (0)   | 0 (0)       | 0 (0)                  | 0 (0)       | 0 (0)                    | 0 (0)               | 0 (0)   |
| endometrium                        | 9   | 1 (0.1)                      | 0 (0)   | 0 (0)   | 0 (0)   | 0 (0)       | 0 (0)                  | 1 (0.1)     | 0 (0)                    | 1 (0.1)             | 0 (0)   |
| eye                                | 1   | 0 (0)                        | 0 (0)   | 0 (0)   | 0 (0)   | 0 (0)       | 0 (0)                  | 0 (0)       | 0 (0)                    | 0 (0)               | 0 (0)   |
| gastrointestinal_tract             | 1   | 0 (0)                        | 0 (0)   | 0 (0)   | 0 (0)   | 0 (0)       | 0 (0)                  | 0 (0)       | 0 (0)                    | 0 (0)               | 0 (0)   |
| haematopoietic_and_lymphoid_tissue | 124 | 0 (0)                        | 6 (0)   | 1 (0)   | 1 (0)   | 3 (0)       | 0 (0)                  | 3 (0)       | 3 (0)                    | 1 (0)               | 3 (0)   |
| kidney                             | 20  | 0 (0)                        | 1 (0.1) | 0 (0)   | 1 (0.1) | 0 (0)       | 0 (0)                  | 0 (0)       | 0 (0)                    | 0 (0)               | 0 (0)   |
| large_intestine                    | 36  | 0 (0)                        | 1 (0)   | 0 (0)   | 1 (0)   | 1 (0)       | 0 (0)                  | 1 (0)       | 1 (0)                    | 0 (0)               | 1 (0)   |
| liver                              | 8   | 0 (0)                        | 0 (0)   | 0 (0)   | 0 (0)   | 0 (0)       | 0 (0)                  | 0 (0)       | 0 (0)                    | 0 (0)               | 0 (0)   |
| lung                               | 145 | 1 (0)                        | 2 (0)   | 2 (0)   | 2 (0)   | 0 (0)       | 0 (0)                  | 0 (0)       | 0 (0)                    | 0 (0)               | 0 (0)   |
| oesophagus                         | 21  | 0 (0)                        | 1 (0)   | 0 (0)   | 0 (0)   | 0 (0)       | 0 (0)                  | 0 (0)       | 0 (0)                    | 0 (0)               | 0 (0)   |
| ovary                              | 22  | 0 (0)                        | 2 (0.1) | 1 (0)   | 0 (0)   | 0 (0)       | 0 (0)                  | 0 (0)       | 1 (0)                    | 1 (0)               | 0 (0)   |
| pancreas                           | 17  | 0 (0)                        | 0 (0)   | 1 (0.1) | 0 (0)   | 0 (0)       | 0 (0)                  | 0 (0)       | 0 (0)                    | 0 (0)               | 0 (0)   |
| placenta                           | 2   | 0 (0)                        | 0 (0)   | 0 (0)   | 0 (0)   | 0 (0)       | 0 (0)                  | 0 (0)       | 0 (0)                    | 0 (0)               | 0 (0)   |
| pleura                             | 5   | 0 (0)                        | 0 (0)   | 0 (0)   | 0 (0)   | 0 (0)       | 0 (0)                  | 0 (0)       | 0 (0)                    | 0 (0)               | 0 (0)   |
| prostate                           | 5   | 0 (0)                        | 1 (0.2) | 0 (0)   | 0 (0)   | 1 (0.2)     | 0 (0)                  | 1 (0.2)     | 0 (0)                    | 0 (0)               | 1 (0.2) |
| skin                               | 51  | 0 (0)                        | 1 (0)   | 0 (0)   | 0 (0)   | 0 (0)       | 0 (0)                  | 0 (0)       | 0 (0)                    | 0 (0)               | 0 (0)   |
| small_intestine                    | 1   | 0 (0)                        | 0 (0)   | 0 (0)   | 0 (0)   | 0 (0)       | 0 (0)                  | 0 (0)       | 0 (0)                    | 0 (0)               | 0 (0)   |
| soft_tissue                        | 19  | 0 (0)                        | 0 (0)   | 0 (0)   | 0 (0)   | 0 (0)       | 0 (0)                  | 0 (0)       | 0 (0)                    | 0 (0)               | 0 (0)   |
| stomach                            | 21  | 0 (0)                        | 1 (0)   | 1 (0)   | 0 (0)   | 0 (0)       | 0 (0)                  | 0 (0)       | 0 (0)                    | 1 (0)               | 0 (0)   |
| testis                             | 3   | 0 (0)                        | 0 (0)   | 0 (0)   | 0 (0)   | 0 (0)       | 0 (0)                  | 0 (0)       | 0 (0)                    | 0 (0)               | 0 (0)   |
| thyroid                            | 11  | 0 (0)                        | 1 (0.1) | 0 (0)   | 0 (0)   | 0 (0)       | 0 (0)                  | 0 (0)       | 0 (0)                    | 0 (0)               | 0 (0)   |
| not specified                      | 1   | 0 (0)                        | 0 (0)   | 0 (0)   | 0 (0)   | 0 (0)       | 0 (0)                  | 0 (0)       | 0 (0)                    | 0 (0)               | 0 (0)   |
| upper_aerodigestive_tract          | 20  | 0 (0)                        | 1 (0.1) | 2 (0.1) | 0 (0)   | 0 (0)       | 0 (0)                  | 0 (0)       | 0 (0)                    | 0 (0)               | 0 (0)   |
| urinary_tract                      | 16  | 0 (0)                        | 0 (0)   | 1 (0.1) | 0 (0)   | 0 (0)       | 0 (0)                  | 0 (0)       | 0 (0)                    | 0 (0)               | 0 (0)   |
| vulva                              | 3   | 0 (0)                        | 0 (0)   | 0 (0)   | 0 (0)   | 0 (0)       | 0 (0)                  | 0 (0)       | 0 (0)                    | 0 (0)               | 0 (0)   |

MSH6 (KCG)

| Cancer Cell lines                  |     | Somatic hemizygous deletions |         |         |         | Somatic HDs | Somatic Amplifications | Breakpoints | Known Cancer Gene Screen |                     |       |
|------------------------------------|-----|------------------------------|---------|---------|---------|-------------|------------------------|-------------|--------------------------|---------------------|-------|
| Tissue                             | №   | <1Mb                         | >1Mb    | Arm     | Chr     |             |                        |             | Point Mutations LOM      | Point Mutations TOV | HDs   |
| adrenal_gland                      | 2   | 0 (0)                        | 0 (0)   | 0 (0)   | 0 (0)   | 0 (0)       | 0 (0)                  | 0 (0)       | 0 (0)                    | 0 (0)               | 0 (0) |
| autonomic_ganglia                  | 36  | 0 (0)                        | 0 (0)   | 0 (0)   | 0 (0)   | 0 (0)       | 0 (0)                  | 0 (0)       | 0 (0)                    | 0 (0)               | 0 (0) |
| biliary_tract                      | 6   | 0 (0)                        | 1 (0.2) | 0 (0)   | 0 (0)   | 0 (0)       | 0 (0)                  | 0 (0)       | 0 (0)                    | 0 (0)               | 0 (0) |
| bone                               | 32  | 0 (0)                        | 1 (0)   | 0 (0)   | 0 (0)   | 0 (0)       | 0 (0)                  | 0 (0)       | 0 (0)                    | 0 (0)               | 0 (0) |
| breast                             | 42  | 0 (0)                        | 2 (0)   | 1 (0)   | 0 (0)   | 0 (0)       | 0 (0)                  | 0 (0)       | 0 (0)                    | 1 (0)               | 0 (0) |
| central_nervous_system             | 55  | 0 (0)                        | 1 (0)   | 0 (0)   | 0 (0)   | 0 (0)       | 0 (0)                  | 0 (0)       | 0 (0)                    | 0 (0)               | 0 (0) |
| cervix                             | 11  | 0 (0)                        | 0 (0)   | 0 (0)   | 0 (0)   | 0 (0)       | 0 (0)                  | 0 (0)       | 0 (0)                    | 0 (0)               | 0 (0) |
| endometrium                        | 9   | 0 (0)                        | 0 (0)   | 0 (0)   | 0 (0)   | 0 (0)       | 0 (0)                  | 0 (0)       | 2 (0.2)                  | 2 (0.2)             | 0 (0) |
| eye                                | 1   | 0 (0)                        | 0 (0)   | 0 (0)   | 0 (0)   | 0 (0)       | 0 (0)                  | 0 (0)       | 0 (0)                    | 0 (0)               | 0 (0) |
| gastrointestinal_tract             | 1   | 0 (0)                        | 0 (0)   | 0 (0)   | 0 (0)   | 0 (0)       | 0 (0)                  | 0 (0)       | 0 (0)                    | 0 (0)               | 0 (0) |
| haematopoietic_and_lymphoid_tissue | 124 | 1 (0)                        | 7 (0.1) | 1 (0)   | 1 (0)   | 1 (0)       | 0 (0)                  | 0 (0)       | 1 (0)                    | 1 (0)               | 0 (0) |
| kidney                             | 20  | 0 (0)                        | 1 (0.1) | 0 (0)   | 1 (0.1) | 0 (0)       | 0 (0)                  | 0 (0)       | 0 (0)                    | 0 (0)               | 0 (0) |
| large_intestine                    | 36  | 0 (0)                        | 1 (0)   | 0 (0)   | 1 (0)   | 0 (0)       | 0 (0)                  | 1 (0)       | 1 (0)                    | 7 (0.2)             | 0 (0) |
| liver                              | 8   | 0 (0)                        | 0 (0)   | 0 (0)   | 0 (0)   | 0 (0)       | 0 (0)                  | 0 (0)       | 0 (0)                    | 0 (0)               | 0 (0) |
| lung                               | 145 | 2 (0)                        | 3 (0)   | 2 (0)   | 2 (0)   | 0 (0)       | 0 (0)                  | 0 (0)       | 1 (0)                    | 1 (0)               | 0 (0) |
| oesophagus                         | 21  | 0 (0)                        | 1 (0)   | 0 (0)   | 0 (0)   | 0 (0)       | 0 (0)                  | 0 (0)       | 0 (0)                    | 0 (0)               | 0 (0) |
| ovary                              | 22  | 0 (0)                        | 2 (0.1) | 1 (0)   | 0 (0)   | 0 (0)       | 0 (0)                  | 0 (0)       | 1 (0)                    | 1 (0)               | 0 (0) |
| pancreas                           | 17  | 0 (0)                        | 0 (0)   | 1 (0.1) | 0 (0)   | 0 (0)       | 0 (0)                  | 0 (0)       | 0 (0)                    | 0 (0)               | 0 (0) |
| placenta                           | 2   | 0 (0)                        | 0 (0)   | 0 (0)   | 0 (0)   | 0 (0)       | 0 (0)                  | 0 (0)       | 0 (0)                    | 0 (0)               | 0 (0) |
| pleura                             | 5   | 0 (0)                        | 0 (0)   | 0 (0)   | 0 (0)   | 0 (0)       | 0 (0)                  | 1 (0.2)     | 0 (0)                    | 0 (0)               | 0 (0) |
| prostate                           | 5   | 0 (0)                        | 1 (0.2) | 0 (0)   | 0 (0)   | 0 (0)       | 0 (0)                  | 0 (0)       | 0 (0)                    | 0 (0)               | 0 (0) |
| skin                               | 51  | 0 (0)                        | 1 (0)   | 0 (0)   | 0 (0)   | 0 (0)       | 0 (0)                  | 0 (0)       | 1 (0)                    | 0 (0)               | 0 (0) |
| small_intestine                    | 1   | 0 (0)                        | 0 (0)   | 0 (0)   | 0 (0)   | 0 (0)       | 0 (0)                  | 0 (0)       | 0 (0)                    | 0 (0)               | 0 (0) |
| soft_tissue                        | 19  | 0 (0)                        | 0 (0)   | 0 (0)   | 0 (0)   | 0 (0)       | 0 (0)                  | 0 (0)       | 0 (0)                    | 0 (0)               | 0 (0) |
| stomach                            | 21  | 0 (0)                        | 1 (0)   | 1 (0)   | 0 (0)   | 0 (0)       | 0 (0)                  | 0 (0)       | 0 (0)                    | 0 (0)               | 0 (0) |
| testis                             | 3   | 0 (0)                        | 0 (0)   | 0 (0)   | 0 (0)   | 0 (0)       | 0 (0)                  | 0 (0)       | 0 (0)                    | 0 (0)               | 0 (0) |
| thyroid                            | 11  | 0 (0)                        | 1 (0.1) | 0 (0)   | 0 (0)   | 0 (0)       | 0 (0)                  | 0 (0)       | 0 (0)                    | 0 (0)               | 0 (0) |
| not specified                      | 1   | 0 (0)                        | 0 (0)   | 0 (0)   | 0 (0)   | 0 (0)       | 0 (0)                  | 0 (0)       | 0 (0)                    | 0 (0)               | 0 (0) |
| upper_aerodigestive_tract          | 20  | 0 (0)                        | 1 (0.1) | 2 (0.1) | 0 (0)   | 0 (0)       | 0 (0)                  | 0 (0)       | 0 (0)                    | 0 (0)               | 0 (0) |
| urinary_tract                      | 16  | 0 (0)                        | 0 (0)   | 1 (0.1) | 0 (0)   | 0 (0)       | 0 (0)                  | 0 (0)       | 1 (0.1)                  | 0 (0)               | 0 (0) |
| vulva                              | 3   | 0 (0)                        | 0 (0)   | 0 (0)   | 0 (0)   | 0 (0)       | 0 (0)                  | 0 (0)       | 0 (0)                    | 0 (0)               | 0 (0) |

MYC (KCG)

| Cancer Cell lines                  |     | Somatic hemizygous deletions |         |       |         | Somatic HDs | Somatic Amplifications | Breakpoints | Known Cancer Gene Screen |                     |       |
|------------------------------------|-----|------------------------------|---------|-------|---------|-------------|------------------------|-------------|--------------------------|---------------------|-------|
| Tissue                             | №   | <1Mb                         | >1Mb    | Arm   | Chr     |             |                        |             | Point Mutations LOM      | Point Mutations TOV | HDs   |
| adrenal_gland                      | 2   | 0 (0)                        | 0 (0)   | 0 (0) | 0 (0)   | 0 (0)       | 0 (0)                  | 0 (0)       | 0 (0)                    | 0 (0)               | 0 (0) |
| autonomic_ganglia                  | 36  | 0 (0)                        | 1 (0)   | 1 (0) | 1 (0)   | 0 (0)       | 2 (0.1)                | 0 (0)       | 0 (0)                    | 0 (0)               | 0 (0) |
| biliary_tract                      | 6   | 0 (0)                        | 0 (0)   | 0 (0) | 0 (0)   | 0 (0)       | 0 (0)                  | 0 (0)       | 0 (0)                    | 0 (0)               | 0 (0) |
| bone                               | 32  | 0 (0)                        | 1 (0)   | 0 (0) | 1 (0)   | 0 (0)       | 2 (0.1)                | 0 (0)       | 0 (0)                    | 0 (0)               | 0 (0) |
| breast                             | 42  | 1 (0)                        | 2 (0)   | 1 (0) | 0 (0)   | 0 (0)       | 3 (0.1)                | 0 (0)       | 0 (0)                    | 0 (0)               | 0 (0) |
| central_nervous_system             | 55  | 0 (0)                        | 2 (0)   | 0 (0) | 0 (0)   | 0 (0)       | 4 (0.1)                | 0 (0)       | 0 (0)                    | 0 (0)               | 0 (0) |
| cervix                             | 11  | 0 (0)                        | 0 (0)   | 0 (0) | 1 (0.1) | 0 (0)       | 0 (0)                  | 0 (0)       | 0 (0)                    | 0 (0)               | 0 (0) |
| endometrium                        | 9   | 0 (0)                        | 0 (0)   | 0 (0) | 0 (0)   | 0 (0)       | 1 (0.1)                | 0 (0)       | 0 (0)                    | 0 (0)               | 0 (0) |
| eye                                | 1   | 0 (0)                        | 0 (0)   | 0 (0) | 0 (0)   | 0 (0)       | 0 (0)                  | 0 (0)       | 0 (0)                    | 0 (0)               | 0 (0) |
| gastrointestinal_tract             | 1   | 0 (0)                        | 0 (0)   | 0 (0) | 0 (0)   | 0 (0)       | 0 (0)                  | 0 (0)       | 0 (0)                    | 0 (0)               | 0 (0) |
| haematopoietic_and_lymphoid_tissue | 124 | 0 (0)                        | 4 (0)   | 0 (0) | 1 (0)   | 0 (0)       | 3 (0)                  | 0 (0)       | 0 (0)                    | 0 (0)               | 0 (0) |
| kidney                             | 20  | 0 (0)                        | 3 (0.2) | 0 (0) | 1 (0.1) | 0 (0)       | 0 (0)                  | 0 (0)       | 0 (0)                    | 0 (0)               | 0 (0) |
| large_intestine                    | 36  | 0 (0)                        | 1 (0)   | 0 (0) | 0 (0)   | 0 (0)       | 2 (0.1)                | 0 (0)       | 0 (0)                    | 0 (0)               | 0 (0) |
| liver                              | 8   | 0 (0)                        | 1 (0.1) | 0 (0) | 0 (0)   | 0 (0)       | 0 (0)                  | 0 (0)       | 0 (0)                    | 0 (0)               | 0 (0) |
| lung                               | 145 | 1 (0)                        | 7 (0)   | 2 (0) | 1 (0)   | 0 (0)       | 20 (0.1)               | 0 (0)       | 0 (0)                    | 0 (0)               | 0 (0) |
| oesophagus                         | 21  | 0 (0)                        | 2 (0.1) | 0 (0) | 0 (0)   | 0 (0)       | 3 (0.1)                | 0 (0)       | 0 (0)                    | 0 (0)               | 0 (0) |
| ovary                              | 22  | 0 (0)                        | 0 (0)   | 0 (0) | 0 (0)   | 0 (0)       | 1 (0)                  | 0 (0)       | 0 (0)                    | 0 (0)               | 0 (0) |
| pancreas                           | 17  | 0 (0)                        | 0 (0)   | 0 (0) | 0 (0)   | 0 (0)       | 1 (0.1)                | 0 (0)       | 0 (0)                    | 0 (0)               | 0 (0) |
| placenta                           | 2   | 0 (0)                        | 0 (0)   | 0 (0) | 0 (0)   | 0 (0)       | 0 (0)                  | 0 (0)       | 0 (0)                    | 0 (0)               | 0 (0) |
| pleura                             | 5   | 0 (0)                        | 0 (0)   | 0 (0) | 0 (0)   | 0 (0)       | 0 (0)                  | 0 (0)       | 0 (0)                    | 0 (0)               | 0 (0) |
| prostate                           | 5   | 0 (0)                        | 0 (0)   | 0 (0) | 0 (0)   | 0 (0)       | 1 (0.2)                | 0 (0)       | 0 (0)                    | 0 (0)               | 0 (0) |
| skin                               | 51  | 0 (0)                        | 2 (0)   | 0 (0) | 0 (0)   | 0 (0)       | 0 (0)                  | 0 (0)       | 0 (0)                    | 0 (0)               | 0 (0) |
| small_intestine                    | 1   | 0 (0)                        | 0 (0)   | 0 (0) | 0 (0)   | 0 (0)       | 0 (0)                  | 0 (0)       | 0 (0)                    | 0 (0)               | 0 (0) |
| soft_tissue                        | 19  | 0 (0)                        | 1 (0.1) | 0 (0) | 0 (0)   | 0 (0)       | 0 (0)                  | 0 (0)       | 0 (0)                    | 0 (0)               | 0 (0) |
| stomach                            | 21  | 0 (0)                        | 0 (0)   | 0 (0) | 0 (0)   | 0 (0)       | 3 (0.1)                | 0 (0)       | 0 (0)                    | 0 (0)               | 0 (0) |
| testis                             | 3   | 0 (0)                        | 0 (0)   | 0 (0) | 0 (0)   | 0 (0)       | 0 (0)                  | 0 (0)       | 0 (0)                    | 0 (0)               | 0 (0) |
| thyroid                            | 11  | 0 (0)                        | 0 (0)   | 0 (0) | 1 (0.1) | 0 (0)       | 1 (0.1)                | 0 (0)       | 0 (0)                    | 0 (0)               | 0 (0) |
| not specified                      | 1   | 0 (0)                        | 0 (0)   | 0 (0) | 0 (0)   | 0 (0)       | 0 (0)                  | 0 (0)       | 0 (0)                    | 0 (0)               | 0 (0) |
| upper_aerodigestive_tract          | 20  | 0 (0)                        | 0 (0)   | 0 (0) | 1 (0.1) | 0 (0)       | 0 (0)                  | 0 (0)       | 0 (0)                    | 0 (0)               | 0 (0) |
| urinary_tract                      | 16  | 0 (0)                        | 1 (0.1) | 0 (0) | 1 (0.1) | 0 (0)       | 0 (0)                  | 0 (0)       | 0 (0)                    | 0 (0)               | 0 (0) |
| vulva                              | 3   | 0 (0)                        | 1 (0.3) | 0 (0) | 0 (0)   | 0 (0)       | 0 (0)                  | 0 (0)       | 0 (0)                    | 0 (0)               | 0 (0) |

NF1 (KCG)

| Cancer Cell lines                  |     | Somatic hemizygous deletions |          |         |          | Somatic HDs | Somatic Amplifications | Breakpoints | Known Cancer Gene Screen |                     |         |
|------------------------------------|-----|------------------------------|----------|---------|----------|-------------|------------------------|-------------|--------------------------|---------------------|---------|
| Tissue                             | №   | <1Mb                         | >1Mb     | Arm     | Chr      |             |                        |             | Point Mutations LOM      | Point Mutations TOV | HDs     |
| adrenal_gland                      | 2   | 0 (0)                        | 0 (0)    | 0 (0)   | 1 (0.5)  | 0 (0)       | 0 (0)                  | 0 (0)       | 0 (0)                    | 0 (0)               | 0 (0)   |
| autonomic_ganglia                  | 36  | 0 (0)                        | 8 (0.2)  | 0 (0)   | 1 (0)    | 4 (0.1)     | 0 (0)                  | 5 (0.1)     | 4 (0.1)                  | 0 (0)               | 4 (0.1) |
| biliary_tract                      | 6   | 0 (0)                        | 2 (0.3)  | 0 (0)   | 0 (0)    | 0 (0)       | 0 (0)                  | 0 (0)       | 0 (0)                    | 0 (0)               | 0 (0)   |
| bone                               | 32  | 0 (0)                        | 5 (0.2)  | 0 (0)   | 5 (0.2)  | 0 (0)       | 0 (0)                  | 0 (0)       | 0 (0)                    | 0 (0)               | 0 (0)   |
| breast                             | 42  | 0 (0)                        | 8 (0.2)  | 2 (0)   | 8 (0.2)  | 0 (0)       | 0 (0)                  | 3 (0.1)     | 1 (0)                    | 1 (0)               | 0 (0)   |
| central_nervous_system             | 55  | 1 (0)                        | 4 (0.1)  | 0 (0)   | 9 (0.2)  | 4 (0.1)     | 0 (0)                  | 5 (0.1)     | 3 (0.1)                  | 3 (0.1)             | 4 (0.1) |
| cervix                             | 11  | 0 (0)                        | 0 (0)    | 1 (0.1) | 1 (0.1)  | 0 (0)       | 0 (0)                  | 0 (0)       | 0 (0)                    | 0 (0)               | 0 (0)   |
| endometrium                        | 9   | 0 (0)                        | 1 (0.1)  | 0 (0)   | 0 (0)    | 0 (0)       | 0 (0)                  | 0 (0)       | 0 (0)                    | 0 (0)               | 0 (0)   |
| eye                                | 1   | 0 (0)                        | 0 (0)    | 0 (0)   | 0 (0)    | 0 (0)       | 0 (0)                  | 0 (0)       | 0 (0)                    | 0 (0)               | 0 (0)   |
| gastrointestinal_tract             | 1   | 0 (0)                        | 0 (0)    | 0 (0)   | 0 (0)    | 0 (0)       | 0 (0)                  | 0 (0)       | 0 (0)                    | 0 (0)               | 0 (0)   |
| haematopoietic_and_lymphoid_tissue | 124 | 0 (0)                        | 7 (0.1)  | 0 (0)   | 3 (0)    | 0 (0)       | 0 (0)                  | 1 (0)       | 1 (0)                    | 0 (0)               | 0 (0)   |
| kidney                             | 20  | 0 (0)                        | 0 (0)    | 0 (0)   | 3 (0.2)  | 0 (0)       | 0 (0)                  | 0 (0)       | 0 (0)                    | 0 (0)               | 0 (0)   |
| large_intestine                    | 36  | 1 (0)                        | 4 (0.1)  | 0 (0)   | 4 (0.1)  | 0 (0)       | 0 (0)                  | 1 (0)       | 2 (0.1)                  | 0 (0)               | 0 (0)   |
| liver                              | 8   | 0 (0)                        | 2 (0.3)  | 0 (0)   | 0 (0)    | 0 (0)       | 0 (0)                  | 0 (0)       | 0 (0)                    | 0 (0)               | 0 (0)   |
| lung                               | 145 | 1 (0)                        | 13 (0.1) | 0 (0)   | 15 (0.1) | 1 (0)       | 0 (0)                  | 4 (0)       | 1 (0)                    | 1 (0)               | 1 (0)   |
| oesophagus                         | 21  | 0 (0)                        | 7 (0.3)  | 0 (0)   | 4 (0.2)  | 0 (0)       | 0 (0)                  | 2 (0.1)     | 0 (0)                    | 0 (0)               | 0 (0)   |
| ovary                              | 22  | 0 (0)                        | 3 (0.1)  | 0 (0)   | 5 (0.2)  | 0 (0)       | 0 (0)                  | 0 (0)       | 0 (0)                    | 0 (0)               | 0 (0)   |
| pancreas                           | 17  | 0 (0)                        | 1 (0.1)  | 0 (0)   | 1 (0.1)  | 0 (0)       | 0 (0)                  | 0 (0)       | 0 (0)                    | 0 (0)               | 0 (0)   |
| placenta                           | 2   | 0 (0)                        | 0 (0)    | 0 (0)   | 0 (0)    | 0 (0)       | 0 (0)                  | 0 (0)       | 0 (0)                    | 0 (0)               | 0 (0)   |
| pleura                             | 5   | 0 (0)                        | 1 (0.2)  | 0 (0)   | 1 (0.2)  | 0 (0)       | 0 (0)                  | 0 (0)       | 0 (0)                    | 0 (0)               | 0 (0)   |
| prostate                           | 5   | 0 (0)                        | 0 (0)    | 0 (0)   | 0 (0)    | 0 (0)       | 0 (0)                  | 0 (0)       | 0 (0)                    | 0 (0)               | 0 (0)   |
| skin                               | 51  | 0 (0)                        | 3 (0.1)  | 0 (0)   | 3 (0.1)  | 0 (0)       | 0 (0)                  | 0 (0)       | 1 (0)                    | 2 (0)               | 0 (0)   |
| small_intestine                    | 1   | 0 (0)                        | 0 (0)    | 0 (0)   | 0 (0)    | 0 (0)       | 0 (0)                  | 0 (0)       | 0 (0)                    | 0 (0)               | 0 (0)   |
| soft_tissue                        | 19  | 0 (0)                        | 0 (0)    | 0 (0)   | 2 (0.1)  | 0 (0)       | 0 (0)                  | 0 (0)       | 0 (0)                    | 1 (0.1)             | 0 (0)   |
| stomach                            | 21  | 1 (0)                        | 3 (0.1)  | 0 (0)   | 2 (0.1)  | 0 (0)       | 0 (0)                  | 1 (0)       | 2 (0.1)                  | 0 (0)               | 0 (0)   |
| testis                             | 3   | 0 (0)                        | 1 (0.3)  | 0 (0)   | 0 (0)    | 0 (0)       | 0 (0)                  | 0 (0)       | 0 (0)                    | 1 (0.3)             | 0 (0)   |
| thyroid                            | 11  | 0 (0)                        | 0 (0)    | 0 (0)   | 4 (0.4)  | 0 (0)       | 0 (0)                  | 0 (0)       | 1 (0.1)                  | 0 (0)               | 0 (0)   |
| not specified                      | 1   | 0 (0)                        | 0 (0)    | 0 (0)   | 0 (0)    | 0 (0)       | 0 (0)                  | 0 (0)       | 0 (0)                    | 0 (0)               | 0 (0)   |
| upper_aerodigestive_tract          | 20  | 0 (0)                        | 2 (0.1)  | 1 (0.1) | 1 (0.1)  | 0 (0)       | 0 (0)                  | 1 (0.1)     | 0 (0)                    | 0 (0)               | 0 (0)   |
| urinary_tract                      | 16  | 0 (0)                        | 1 (0.1)  | 0 (0)   | 0 (0)    | 0 (0)       | 0 (0)                  | 0 (0)       | 0 (0)                    | 0 (0)               | 0 (0)   |
| vulva                              | 3   | 0 (0)                        | 0 (0)    | 0 (0)   | 0 (0)    | 0 (0)       | 0 (0)                  | 0 (0)       | 0 (0)                    | 0 (0)               | 0 (0)   |

NF2 (KCG)

| Cancer Cell lines                  |     | Somatic hemizygous deletions |          |          |       | Somatic HDs | Somatic Amplifications | Breakpoints | Known Cancer Gene Screen |                     |       |
|------------------------------------|-----|------------------------------|----------|----------|-------|-------------|------------------------|-------------|--------------------------|---------------------|-------|
| Tissue                             | №   | <1Mb                         | >1Mb     | Arm      | Chr   |             |                        |             | Point Mutations LOM      | Point Mutations TOV | HDs   |
| adrenal_gland                      | 2   | 0 (0)                        | 1 (0.5)  | 1 (0.5)  | 0 (0) | 0 (0)       | 0 (0)                  | 0 (0)       | 0 (0)                    | 0 (0)               | 0 (0) |
| autonomic_ganglia                  | 36  | 1 (0)                        | 1 (0)    | 0 (0)    | 0 (0) | 0 (0)       | 0 (0)                  | 1 (0)       | 0 (0)                    | 0 (0)               | 0 (0) |
| biliary_tract                      | 6   | 0 (0)                        | 0 (0)    | 2 (0.3)  | 0 (0) | 0 (0)       | 0 (0)                  | 0 (0)       | 0 (0)                    | 0 (0)               | 0 (0) |
| bone                               | 32  | 0 (0)                        | 4 (0.1)  | 0 (0)    | 0 (0) | 0 (0)       | 0 (0)                  | 0 (0)       | 1 (0)                    | 0 (0)               | 0 (0) |
| breast                             | 42  | 0 (0)                        | 4 (0.1)  | 11 (0.3) | 0 (0) | 0 (0)       | 0 (0)                  | 0 (0)       | 1 (0)                    | 0 (0)               | 0 (0) |
| central_nervous_system             | 55  | 0 (0)                        | 5 (0.1)  | 11 (0.2) | 0 (0) | 1 (0)       | 0 (0)                  | 1 (0)       | 1 (0)                    | 0 (0)               | 1 (0) |
| cervix                             | 11  | 0 (0)                        | 0 (0)    | 1 (0.1)  | 0 (0) | 0 (0)       | 0 (0)                  | 0 (0)       | 0 (0)                    | 0 (0)               | 0 (0) |
| endometrium                        | 9   | 0 (0)                        | 0 (0)    | 1 (0.1)  | 0 (0) | 0 (0)       | 0 (0)                  | 0 (0)       | 1 (0.1)                  | 1 (0.1)             | 0 (0) |
| eye                                | 1   | 0 (0)                        | 0 (0)    | 0 (0)    | 0 (0) | 0 (0)       | 0 (0)                  | 0 (0)       | 0 (0)                    | 0 (0)               | 0 (0) |
| gastrointestinal_tract             | 1   | 0 (0)                        | 1 (1)    | 0 (0)    | 0 (0) | 0 (0)       | 0 (0)                  | 0 (0)       | 0 (0)                    | 0 (0)               | 0 (0) |
| haematopoietic_and_lymphoid_tissue | 124 | 0 (0)                        | 4 (0)    | 7 (0.1)  | 0 (0) | 0 (0)       | 0 (0)                  | 0 (0)       | 0 (0)                    | 0 (0)               | 0 (0) |
| kidney                             | 20  | 0 (0)                        | 4 (0.2)  | 4 (0.2)  | 0 (0) | 0 (0)       | 0 (0)                  | 0 (0)       | 4 (0.2)                  | 0 (0)               | 0 (0) |
| large_intestine                    | 36  | 1 (0)                        | 3 (0.1)  | 9 (0.3)  | 0 (0) | 1 (0)       | 0 (0)                  | 2 (0.1)     | 0 (0)                    | 1 (0)               | 1 (0) |
| liver                              | 8   | 0 (0)                        | 0 (0)    | 3 (0.4)  | 0 (0) | 0 (0)       | 0 (0)                  | 0 (0)       | 0 (0)                    | 1 (0.1)             | 0 (0) |
| lung                               | 145 | 1 (0)                        | 19 (0.1) | 44 (0.3) | 0 (0) | 1 (0)       | 0 (0)                  | 2 (0)       | 0 (0)                    | 1 (0)               | 1 (0) |
| oesophagus                         | 21  | 0 (0)                        | 3 (0.1)  | 4 (0.2)  | 0 (0) | 0 (0)       | 0 (0)                  | 1 (0)       | 0 (0)                    | 0 (0)               | 0 (0) |
| ovary                              | 22  | 1 (0)                        | 0 (0)    | 5 (0.2)  | 0 (0) | 0 (0)       | 0 (0)                  | 1 (0)       | 0 (0)                    | 0 (0)               | 0 (0) |
| pancreas                           | 17  | 0 (0)                        | 5 (0.3)  | 3 (0.2)  | 0 (0) | 0 (0)       | 0 (0)                  | 0 (0)       | 0 (0)                    | 0 (0)               | 0 (0) |
| placenta                           | 2   | 0 (0)                        | 0 (0)    | 0 (0)    | 0 (0) | 0 (0)       | 0 (0)                  | 0 (0)       | 0 (0)                    | 0 (0)               | 0 (0) |
| pleura                             | 5   | 0 (0)                        | 1 (0.2)  | 2 (0.4)  | 0 (0) | 0 (0)       | 0 (0)                  | 0 (0)       | 2 (0.4)                  | 0 (0)               | 0 (0) |
| prostate                           | 5   | 0 (0)                        | 1 (0.2)  | 0 (0)    | 0 (0) | 0 (0)       | 0 (0)                  | 0 (0)       | 0 (0)                    | 1 (0.2)             | 0 (0) |
| skin                               | 51  | 0 (0)                        | 6 (0.1)  | 2 (0)    | 0 (0) | 0 (0)       | 0 (0)                  | 0 (0)       | 0 (0)                    | 0 (0)               | 0 (0) |
| small_intestine                    | 1   | 0 (0)                        | 0 (0)    | 0 (0)    | 0 (0) | 0 (0)       | 0 (0)                  | 0 (0)       | 0 (0)                    | 0 (0)               | 0 (0) |
| soft_tissue                        | 19  | 0 (0)                        | 0 (0)    | 5 (0.3)  | 0 (0) | 0 (0)       | 0 (0)                  | 0 (0)       | 3 (0.2)                  | 0 (0)               | 0 (0) |
| stomach                            | 21  | 0 (0)                        | 2 (0.1)  | 4 (0.2)  | 0 (0) | 1 (0)       | 0 (0)                  | 1 (0)       | 1 (0)                    | 0 (0)               | 1 (0) |
| testis                             | 3   | 0 (0)                        | 0 (0)    | 1 (0.3)  | 0 (0) | 0 (0)       | 0 (0)                  | 0 (0)       | 0 (0)                    | 0 (0)               | 0 (0) |
| thyroid                            | 11  | 0 (0)                        | 0 (0)    | 5 (0.5)  | 0 (0) | 0 (0)       | 0 (0)                  | 0 (0)       | 2 (0.2)                  | 0 (0)               | 0 (0) |
| not specified                      | 1   | 0 (0)                        | 0 (0)    | 0 (0)    | 0 (0) | 0 (0)       | 0 (0)                  | 0 (0)       | 0 (0)                    | 0 (0)               | 0 (0) |
| upper_aerodigestive_tract          | 20  | 0 (0)                        | 2 (0.1)  | 2 (0.1)  | 0 (0) | 0 (0)       | 0 (0)                  | 0 (0)       | 0 (0)                    | 0 (0)               | 0 (0) |
| urinary_tract                      | 16  | 0 (0)                        | 3 (0.2)  | 4 (0.3)  | 0 (0) | 0 (0)       | 0 (0)                  | 0 (0)       | 2 (0.1)                  | 0 (0)               | 0 (0) |
| vulva                              | 3   | 0 (0)                        | 0 (0)    | 0 (0)    | 0 (0) | 0 (0)       | 0 (0)                  | 0 (0)       | 0 (0)                    | 0 (0)               | 0 (0) |

NOTCH (KCG)

| Cancer Cell lines                  |     | Somatic hemizygous deletions |         |          |          | Somatic HDs | Somatic Amplifications | Breakpoints | Known Cancer Gene Screen |                     |       |
|------------------------------------|-----|------------------------------|---------|----------|----------|-------------|------------------------|-------------|--------------------------|---------------------|-------|
| Tissue                             | №   | <1Mb                         | >1Mb    | Arm      | Chr      |             |                        |             | Point Mutations LOM      | Point Mutations TOV | HDs   |
| adrenal_gland                      | 2   | 0 (0)                        | 0 (0)   | 0 (0)    | 0 (0)    | 0 (0)       | 0 (0)                  | 0 (0)       | 0 (0)                    | 0 (0)               | 0 (0) |
| autonomic_ganglia                  | 36  | 0 (0)                        | 0 (0)   | 1 (0)    | 0 (0)    | 0 (0)       | 0 (0)                  | 0 (0)       | 0 (0)                    | 0 (0)               | 0 (0) |
| biliary_tract                      | 6   | 0 (0)                        | 1 (0.2) | 1 (0.2)  | 2 (0.3)  | 0 (0)       | 0 (0)                  | 0 (0)       | 0 (0)                    | 0 (0)               | 0 (0) |
| bone                               | 32  | 0 (0)                        | 1 (0)   | 0 (0)    | 0 (0)    | 0 (0)       | 0 (0)                  | 0 (0)       | 0 (0)                    | 0 (0)               | 0 (0) |
| breast                             | 42  | 0 (0)                        | 3 (0.1) | 4 (0.1)  | 3 (0.1)  | 0 (0)       | 0 (0)                  | 1 (0)       | 0 (0)                    | 0 (0)               | 0 (0) |
| central_nervous_system             | 55  | 0 (0)                        | 0 (0)   | 1 (0)    | 0 (0)    | 0 (0)       | 0 (0)                  | 0 (0)       | 0 (0)                    | 0 (0)               | 0 (0) |
| cervix                             | 11  | 0 (0)                        | 1 (0.1) | 0 (0)    | 1 (0.1)  | 0 (0)       | 0 (0)                  | 0 (0)       | 0 (0)                    | 0 (0)               | 0 (0) |
| endometrium                        | 9   | 0 (0)                        | 1 (0.1) | 0 (0)    | 1 (0.1)  | 0 (0)       | 0 (0)                  | 1 (0.1)     | 0 (0)                    | 0 (0)               | 0 (0) |
| eye                                | 1   | 0 (0)                        | 0 (0)   | 0 (0)    | 0 (0)    | 0 (0)       | 0 (0)                  | 0 (0)       | 0 (0)                    | 0 (0)               | 0 (0) |
| gastrointestinal_tract             | 1   | 0 (0)                        | 0 (0)   | 0 (0)    | 0 (0)    | 0 (0)       | 0 (0)                  | 0 (0)       | 0 (0)                    | 0 (0)               | 0 (0) |
| haematopoietic_and_lymphoid_tissue | 124 | 0 (0)                        | 8 (0.1) | 5 (0)    | 1 (0)    | 0 (0)       | 0 (0)                  | 1 (0)       | 13 (0.1)                 | 0 (0)               | 0 (0) |
| kidney                             | 20  | 0 (0)                        | 1 (0.1) | 2 (0.1)  | 2 (0.1)  | 0 (0)       | 0 (0)                  | 1 (0.1)     | 0 (0)                    | 0 (0)               | 0 (0) |
| large_intestine                    | 36  | 0 (0)                        | 2 (0.1) | 2 (0.1)  | 2 (0.1)  | 0 (0)       | 0 (0)                  | 0 (0)       | 1 (0)                    | 0 (0)               | 0 (0) |
| liver                              | 8   | 0 (0)                        | 1 (0.1) | 0 (0)    | 0 (0)    | 0 (0)       | 0 (0)                  | 0 (0)       | 0 (0)                    | 0 (0)               | 0 (0) |
| lung                               | 145 | 0 (0)                        | 9 (0.1) | 13 (0.1) | 19 (0.1) | 0 (0)       | 0 (0)                  | 1 (0)       | 0 (0)                    | 0 (0)               | 0 (0) |
| oesophagus                         | 21  | 0 (0)                        | 3 (0.1) | 1 (0)    | 3 (0.1)  | 0 (0)       | 0 (0)                  | 0 (0)       | 1 (0)                    | 0 (0)               | 0 (0) |
| ovary                              | 22  | 0 (0)                        | 0 (0)   | 2 (0.1)  | 2 (0.1)  | 0 (0)       | 0 (0)                  | 0 (0)       | 0 (0)                    | 0 (0)               | 0 (0) |
| pancreas                           | 17  | 0 (0)                        | 1 (0.1) | 1 (0.1)  | 3 (0.2)  | 0 (0)       | 0 (0)                  | 0 (0)       | 0 (0)                    | 0 (0)               | 0 (0) |
| placenta                           | 2   | 0 (0)                        | 0 (0)   | 0 (0)    | 0 (0)    | 0 (0)       | 0 (0)                  | 0 (0)       | 0 (0)                    | 0 (0)               | 0 (0) |
| pleura                             | 5   | 0 (0)                        | 0 (0)   | 0 (0)    | 0 (0)    | 0 (0)       | 0 (0)                  | 0 (0)       | 0 (0)                    | 0 (0)               | 0 (0) |
| prostate                           | 5   | 0 (0)                        | 0 (0)   | 0 (0)    | 0 (0)    | 0 (0)       | 0 (0)                  | 0 (0)       | 0 (0)                    | 0 (0)               | 0 (0) |
| skin                               | 51  | 0 (0)                        | 5 (0.1) | 4 (0.1)  | 2 (0)    | 0 (0)       | 0 (0)                  | 0 (0)       | 0 (0)                    | 0 (0)               | 0 (0) |
| small_intestine                    | 1   | 0 (0)                        | 0 (0)   | 0 (0)    | 0 (0)    | 0 (0)       | 0 (0)                  | 0 (0)       | 0 (0)                    | 0 (0)               | 0 (0) |
| soft_tissue                        | 19  | 0 (0)                        | 0 (0)   | 0 (0)    | 2 (0.1)  | 0 (0)       | 0 (0)                  | 0 (0)       | 0 (0)                    | 0 (0)               | 0 (0) |
| stomach                            | 21  | 0 (0)                        | 1 (0)   | 3 (0.1)  | 0 (0)    | 0 (0)       | 0 (0)                  | 0 (0)       | 0 (0)                    | 0 (0)               | 0 (0) |
| testis                             | 3   | 0 (0)                        | 0 (0)   | 2 (0.7)  | 1 (0.3)  | 0 (0)       | 0 (0)                  | 0 (0)       | 0 (0)                    | 0 (0)               | 0 (0) |
| thyroid                            | 11  | 0 (0)                        | 1 (0.1) | 1 (0.1)  | 2 (0.2)  | 0 (0)       | 0 (0)                  | 0 (0)       | 0 (0)                    | 0 (0)               | 0 (0) |
| not specified                      | 1   | 0 (0)                        | 0 (0)   | 0 (0)    | 0 (0)    | 0 (0)       | 0 (0)                  | 0 (0)       | 0 (0)                    | 0 (0)               | 0 (0) |
| upper_aerodigestive_tract          | 20  | 0 (0)                        | 1 (0.1) | 2 (0.1)  | 3 (0.2)  | 0 (0)       | 0 (0)                  | 0 (0)       | 1 (0.1)                  | 0 (0)               | 0 (0) |
| urinary_tract                      | 16  | 0 (0)                        | 0 (0)   | 2 (0.1)  | 1 (0.1)  | 0 (0)       | 0 (0)                  | 0 (0)       | 0 (0)                    | 0 (0)               | 0 (0) |
| vulva                              | 3   | 0 (0)                        | 0 (0)   | 0 (0)    | 0 (0)    | 0 (0)       | 0 (0)                  | 0 (0)       | 0 (0)                    | 0 (0)               | 0 (0) |

NPM1 (KCG)

| Cancer Cell lines                  |     | Somatic hemizygous deletions |          |          |         | Somatic HDs | Somatic Amplifications | Breakpoints | Known Cancer Gene Screen |                     |       |
|------------------------------------|-----|------------------------------|----------|----------|---------|-------------|------------------------|-------------|--------------------------|---------------------|-------|
| Tissue                             | №   | <1Mb                         | >1Mb     | Arm      | Chr     |             |                        |             | Point Mutations LOM      | Point Mutations TOV | HDs   |
| adrenal_gland                      | 2   | 0 (0)                        | 0 (0)    | 0 (0)    | 0 (0)   | 0 (0)       | 0 (0)                  | 0 (0)       | 0 (0)                    | 0 (0)               | 0 (0) |
| autonomic_ganglia                  | 36  | 0 (0)                        | 2 (0.1)  | 1 (0)    | 1 (0)   | 0 (0)       | 0 (0)                  | 0 (0)       | 0 (0)                    | 0 (0)               | 0 (0) |
| biliary_tract                      | 6   | 0 (0)                        | 0 (0)    | 3 (0.5)  | 0 (0)   | 0 (0)       | 0 (0)                  | 0 (0)       | 0 (0)                    | 0 (0)               | 0 (0) |
| bone                               | 32  | 0 (0)                        | 2 (0.1)  | 0 (0)    | 1 (0)   | 0 (0)       | 0 (0)                  | 0 (0)       | 0 (0)                    | 0 (0)               | 0 (0) |
| breast                             | 42  | 0 (0)                        | 5 (0.1)  | 3 (0.1)  | 0 (0)   | 0 (0)       | 0 (0)                  | 0 (0)       | 0 (0)                    | 0 (0)               | 0 (0) |
| central_nervous_system             | 55  | 0 (0)                        | 1 (0)    | 0 (0)    | 0 (0)   | 0 (0)       | 0 (0)                  | 0 (0)       | 0 (0)                    | 0 (0)               | 0 (0) |
| cervix                             | 11  | 0 (0)                        | 1 (0.1)  | 2 (0.2)  | 0 (0)   | 0 (0)       | 0 (0)                  | 0 (0)       | 0 (0)                    | 0 (0)               | 0 (0) |
| endometrium                        | 9   | 0 (0)                        | 0 (0)    | 0 (0)    | 0 (0)   | 0 (0)       | 0 (0)                  | 0 (0)       | 0 (0)                    | 0 (0)               | 0 (0) |
| eye                                | 1   | 0 (0)                        | 0 (0)    | 0 (0)    | 0 (0)   | 0 (0)       | 0 (0)                  | 0 (0)       | 0 (0)                    | 0 (0)               | 0 (0) |
| gastrointestinal_tract             | 1   | 0 (0)                        | 0 (0)    | 1 (1)    | 0 (0)   | 0 (0)       | 0 (0)                  | 0 (0)       | 0 (0)                    | 0 (0)               | 0 (0) |
| haematopoietic_and_lymphoid_tissue | 124 | 2 (0)                        | 2 (0)    | 0 (0)    | 0 (0)   | 0 (0)       | 0 (0)                  | 2 (0)       | 0 (0)                    | 0 (0)               | 0 (0) |
| kidney                             | 20  | 0 (0)                        | 1 (0.1)  | 0 (0)    | 1 (0.1) | 0 (0)       | 0 (0)                  | 0 (0)       | 0 (0)                    | 0 (0)               | 0 (0) |
| large_intestine                    | 36  | 0 (0)                        | 3 (0.1)  | 0 (0)    | 2 (0.1) | 0 (0)       | 0 (0)                  | 0 (0)       | 0 (0)                    | 0 (0)               | 0 (0) |
| liver                              | 8   | 0 (0)                        | 2 (0.3)  | 0 (0)    | 0 (0)   | 0 (0)       | 0 (0)                  | 0 (0)       | 0 (0)                    | 0 (0)               | 0 (0) |
| lung                               | 145 | 0 (0)                        | 19 (0.1) | 29 (0.2) | 1 (0)   | 0 (0)       | 0 (0)                  | 0 (0)       | 0 (0)                    | 0 (0)               | 0 (0) |
| oesophagus                         | 21  | 0 (0)                        | 3 (0.1)  | 2 (0.1)  | 0 (0)   | 0 (0)       | 0 (0)                  | 0 (0)       | 0 (0)                    | 0 (0)               | 0 (0) |
| ovary                              | 22  | 0 (0)                        | 0 (0)    | 1 (0)    | 1 (0)   | 0 (0)       | 0 (0)                  | 0 (0)       | 0 (0)                    | 0 (0)               | 0 (0) |
| pancreas                           | 17  | 0 (0)                        | 1 (0.1)  | 0 (0)    | 1 (0.1) | 0 (0)       | 0 (0)                  | 0 (0)       | 0 (0)                    | 0 (0)               | 0 (0) |
| placenta                           | 2   | 0 (0)                        | 0 (0)    | 0 (0)    | 0 (0)   | 0 (0)       | 0 (0)                  | 0 (0)       | 0 (0)                    | 0 (0)               | 0 (0) |
| pleura                             | 5   | 0 (0)                        | 0 (0)    | 0 (0)    | 0 (0)   | 0 (0)       | 0 (0)                  | 0 (0)       | 0 (0)                    | 0 (0)               | 0 (0) |
| prostate                           | 5   | 0 (0)                        | 1 (0.2)  | 0 (0)    | 0 (0)   | 0 (0)       | 0 (0)                  | 0 (0)       | 0 (0)                    | 0 (0)               | 0 (0) |
| skin                               | 51  | 0 (0)                        | 0 (0)    | 5 (0.1)  | 1 (0)   | 0 (0)       | 0 (0)                  | 0 (0)       | 0 (0)                    | 0 (0)               | 0 (0) |
| small_intestine                    | 1   | 0 (0)                        | 0 (0)    | 0 (0)    | 0 (0)   | 0 (0)       | 0 (0)                  | 0 (0)       | 0 (0)                    | 0 (0)               | 0 (0) |
| soft_tissue                        | 19  | 0 (0)                        | 2 (0.1)  | 1 (0.1)  | 1 (0.1) | 0 (0)       | 0 (0)                  | 0 (0)       | 0 (0)                    | 0 (0)               | 0 (0) |
| stomach                            | 21  | 0 (0)                        | 0 (0)    | 0 (0)    | 2 (0.1) | 0 (0)       | 0 (0)                  | 0 (0)       | 0 (0)                    | 0 (0)               | 0 (0) |
| testis                             | 3   | 0 (0)                        | 1 (0.3)  | 0 (0)    | 0 (0)   | 0 (0)       | 0 (0)                  | 0 (0)       | 0 (0)                    | 0 (0)               | 0 (0) |
| thyroid                            | 11  | 0 (0)                        | 1 (0.1)  | 0 (0)    | 1 (0.1) | 0 (0)       | 0 (0)                  | 0 (0)       | 0 (0)                    | 0 (0)               | 0 (0) |
| not specified                      | 1   | 0 (0)                        | 0 (0)    | 0 (0)    | 0 (0)   | 0 (0)       | 0 (0)                  | 0 (0)       | 0 (0)                    | 0 (0)               | 0 (0) |
| upper_aerodigestive_tract          | 20  | 0 (0)                        | 2 (0.1)  | 4 (0.2)  | 0 (0)   | 0 (0)       | 0 (0)                  | 0 (0)       | 0 (0)                    | 0 (0)               | 0 (0) |
| urinary_tract                      | 16  | 0 (0)                        | 1 (0.1)  | 2 (0.1)  | 0 (0)   | 0 (0)       | 0 (0)                  | 0 (0)       | 0 (0)                    | 0 (0)               | 0 (0) |
| vulva                              | 3   | 0 (0)                        | 0 (0)    | 0 (0)    | 0 (0)   | 0 (0)       | 0 (0)                  | 0 (0)       | 0 (0)                    | 0 (0)               | 0 (0) |

NRAS (KCG)

| Cancer Cell lines                  |     | Somatic hemizygous deletions |          |         |         | Somatic HDs | Somatic Amplifications | Breakpoints | Known Cancer Gene Screen |                     |       |
|------------------------------------|-----|------------------------------|----------|---------|---------|-------------|------------------------|-------------|--------------------------|---------------------|-------|
| Tissue                             | №   | <1Mb                         | >1Mb     | Arm     | Chr     |             |                        |             | Point Mutations LOM      | Point Mutations TOV | HDs   |
| adrenal_gland                      | 2   | 0 (0)                        | 1 (0.5)  | 0 (0)   | 0 (0)   | 0 (0)       | 0 (0)                  | 0 (0)       | 0 (0)                    | 0 (0)               | 0 (0) |
| autonomic_ganglia                  | 36  | 0 (0)                        | 1 (0)    | 1 (0)   | 0 (0)   | 0 (0)       | 0 (0)                  | 0 (0)       | 2 (0.1)                  | 0 (0)               | 0 (0) |
| biliary_tract                      | 6   | 0 (0)                        | 0 (0)    | 0 (0)   | 0 (0)   | 0 (0)       | 0 (0)                  | 0 (0)       | 0 (0)                    | 0 (0)               | 0 (0) |
| bone                               | 32  | 0 (0)                        | 0 (0)    | 0 (0)   | 0 (0)   | 0 (0)       | 0 (0)                  | 0 (0)       | 0 (0)                    | 0 (0)               | 0 (0) |
| breast                             | 42  | 1 (0)                        | 5 (0.1)  | 1 (0)   | 0 (0)   | 0 (0)       | 0 (0)                  | 0 (0)       | 0 (0)                    | 0 (0)               | 0 (0) |
| central_nervous_system             | 55  | 0 (0)                        | 3 (0.1)  | 0 (0)   | 0 (0)   | 0 (0)       | 0 (0)                  | 0 (0)       | 1 (0)                    | 0 (0)               | 0 (0) |
| cervix                             | 11  | 0 (0)                        | 0 (0)    | 2 (0.2) | 0 (0)   | 0 (0)       | 0 (0)                  | 0 (0)       | 0 (0)                    | 0 (0)               | 0 (0) |
| endometrium                        | 9   | 0 (0)                        | 0 (0)    | 0 (0)   | 0 (0)   | 0 (0)       | 0 (0)                  | 0 (0)       | 0 (0)                    | 0 (0)               | 0 (0) |
| eye                                | 1   | 0 (0)                        | 0 (0)    | 0 (0)   | 0 (0)   | 0 (0)       | 0 (0)                  | 0 (0)       | 0 (0)                    | 0 (0)               | 0 (0) |
| gastrointestinal_tract             | 1   | 0 (0)                        | 0 (0)    | 0 (0)   | 0 (0)   | 0 (0)       | 0 (0)                  | 0 (0)       | 0 (0)                    | 0 (0)               | 0 (0) |
| haematopoietic_and_lymphoid_tissue | 124 | 0 (0)                        | 5 (0)    | 1 (0)   | 0 (0)   | 0 (0)       | 0 (0)                  | 0 (0)       | 21 (0.2)                 | 0 (0)               | 0 (0) |
| kidney                             | 20  | 0 (0)                        | 0 (0)    | 0 (0)   | 0 (0)   | 0 (0)       | 0 (0)                  | 0 (0)       | 0 (0)                    | 0 (0)               | 0 (0) |
| large_intestine                    | 36  | 0 (0)                        | 3 (0.1)  | 0 (0)   | 0 (0)   | 0 (0)       | 0 (0)                  | 0 (0)       | 0 (0)                    | 0 (0)               | 0 (0) |
| liver                              | 8   | 0 (0)                        | 1 (0.1)  | 0 (0)   | 0 (0)   | 0 (0)       | 0 (0)                  | 0 (0)       | 2 (0.3)                  | 0 (0)               | 0 (0) |
| lung                               | 145 | 1 (0)                        | 18 (0.1) | 7 (0)   | 0 (0)   | 0 (0)       | 1 (0)                  | 0 (0)       | 2 (0)                    | 0 (0)               | 0 (0) |
| oesophagus                         | 21  | 1 (0)                        | 3 (0.1)  | 0 (0)   | 0 (0)   | 0 (0)       | 0 (0)                  | 0 (0)       | 0 (0)                    | 0 (0)               | 0 (0) |
| ovary                              | 22  | 0 (0)                        | 0 (0)    | 0 (0)   | 0 (0)   | 0 (0)       | 0 (0)                  | 1 (0)       | 2 (0.1)                  | 0 (0)               | 0 (0) |
| pancreas                           | 17  | 0 (0)                        | 3 (0.2)  | 0 (0)   | 0 (0)   | 0 (0)       | 0 (0)                  | 0 (0)       | 0 (0)                    | 0 (0)               | 0 (0) |
| placenta                           | 2   | 0 (0)                        | 0 (0)    | 0 (0)   | 0 (0)   | 0 (0)       | 0 (0)                  | 0 (0)       | 0 (0)                    | 0 (0)               | 0 (0) |
| pleura                             | 5   | 0 (0)                        | 1 (0.2)  | 1 (0.2) | 0 (0)   | 0 (0)       | 0 (0)                  | 0 (0)       | 0 (0)                    | 0 (0)               | 0 (0) |
| prostate                           | 5   | 0 (0)                        | 0 (0)    | 0 (0)   | 0 (0)   | 0 (0)       | 0 (0)                  | 0 (0)       | 0 (0)                    | 0 (0)               | 0 (0) |
| skin                               | 51  | 0 (0)                        | 3 (0.1)  | 1 (0)   | 0 (0)   | 0 (0)       | 0 (0)                  | 0 (0)       | 10 (0.2)                 | 0 (0)               | 0 (0) |
| small_intestine                    | 1   | 0 (0)                        | 0 (0)    | 0 (0)   | 0 (0)   | 0 (0)       | 0 (0)                  | 0 (0)       | 0 (0)                    | 0 (0)               | 0 (0) |
| soft_tissue                        | 19  | 0 (0)                        | 1 (0.1)  | 1 (0.1) | 0 (0)   | 0 (0)       | 0 (0)                  | 0 (0)       | 3 (0.2)                  | 0 (0)               | 0 (0) |
| stomach                            | 21  | 0 (0)                        | 2 (0.1)  | 1 (0)   | 0 (0)   | 0 (0)       | 0 (0)                  | 0 (0)       | 0 (0)                    | 0 (0)               | 0 (0) |
| testis                             | 3   | 0 (0)                        | 0 (0)    | 0 (0)   | 0 (0)   | 0 (0)       | 0 (0)                  | 0 (0)       | 0 (0)                    | 0 (0)               | 0 (0) |
| thyroid                            | 11  | 0 (0)                        | 0 (0)    | 0 (0)   | 1 (0.1) | 0 (0)       | 0 (0)                  | 0 (0)       | 0 (0)                    | 0 (0)               | 0 (0) |
| not specified                      | 1   | 0 (0)                        | 0 (0)    | 0 (0)   | 0 (0)   | 0 (0)       | 0 (0)                  | 0 (0)       | 0 (0)                    | 0 (0)               | 0 (0) |
| upper_aerodigestive_tract          | 20  | 0 (0)                        | 1 (0.1)  | 0 (0)   | 0 (0)   | 0 (0)       | 0 (0)                  | 0 (0)       | 0 (0)                    | 0 (0)               | 0 (0) |
| urinary_tract                      | 16  | 0 (0)                        | 0 (0)    | 1 (0.1) | 0 (0)   | 0 (0)       | 0 (0)                  | 0 (0)       | 3 (0.2)                  | 0 (0)               | 0 (0) |
| vulva                              | 3   | 0 (0)                        | 0 (0)    | 0 (0)   | 0 (0)   | 0 (0)       | 0 (0)                  | 0 (0)       | 0 (0)                    | 0 (0)               | 0 (0) |

NTRK3 (KCG)

| Cancer Cell lines                  |     | Somatic hemizygous deletions |          |          |       | Somatic HDs | Somatic Amplifications | Breakpoints | Known Cancer Gene Screen |                     |       |
|------------------------------------|-----|------------------------------|----------|----------|-------|-------------|------------------------|-------------|--------------------------|---------------------|-------|
| Tissue                             | №   | <1Mb                         | >1Mb     | Arm      | Chr   |             |                        |             | Point Mutations LOM      | Point Mutations TOV | HDs   |
| adrenal_gland                      | 2   | 0 (0)                        | 0 (0)    | 0 (0)    | 0 (0) | 0 (0)       | 0 (0)                  | 0 (0)       | 0 (0)                    | 0 (0)               | 0 (0) |
| autonomic_ganglia                  | 36  | 0 (0)                        | 2 (0.1)  | 1 (0)    | 0 (0) | 0 (0)       | 0 (0)                  | 0 (0)       | 0 (0)                    | 0 (0)               | 0 (0) |
| biliary_tract                      | 6   | 0 (0)                        | 1 (0.2)  | 0 (0)    | 0 (0) | 0 (0)       | 0 (0)                  | 0 (0)       | 0 (0)                    | 0 (0)               | 0 (0) |
| bone                               | 32  | 0 (0)                        | 3 (0.1)  | 0 (0)    | 0 (0) | 0 (0)       | 0 (0)                  | 0 (0)       | 0 (0)                    | 0 (0)               | 0 (0) |
| breast                             | 42  | 0 (0)                        | 5 (0.1)  | 1 (0)    | 0 (0) | 0 (0)       | 0 (0)                  | 1 (0)       | 0 (0)                    | 0 (0)               | 0 (0) |
| central_nervous_system             | 55  | 0 (0)                        | 4 (0.1)  | 2 (0)    | 0 (0) | 0 (0)       | 0 (0)                  | 0 (0)       | 0 (0)                    | 0 (0)               | 0 (0) |
| cervix                             | 11  | 0 (0)                        | 4 (0.4)  | 0 (0)    | 0 (0) | 0 (0)       | 0 (0)                  | 0 (0)       | 0 (0)                    | 0 (0)               | 0 (0) |
| endometrium                        | 9   | 0 (0)                        | 1 (0.1)  | 0 (0)    | 0 (0) | 0 (0)       | 0 (0)                  | 0 (0)       | 0 (0)                    | 0 (0)               | 0 (0) |
| eye                                | 1   | 0 (0)                        | 0 (0)    | 0 (0)    | 0 (0) | 0 (0)       | 0 (0)                  | 0 (0)       | 0 (0)                    | 0 (0)               | 0 (0) |
| gastrointestinal_tract             | 1   | 0 (0)                        | 0 (0)    | 0 (0)    | 0 (0) | 0 (0)       | 0 (0)                  | 0 (0)       | 0 (0)                    | 0 (0)               | 0 (0) |
| haematopoietic_and_lymphoid_tissue | 124 | 1 (0)                        | 4 (0)    | 2 (0)    | 0 (0) | 0 (0)       | 0 (0)                  | 0 (0)       | 0 (0)                    | 0 (0)               | 0 (0) |
| kidney                             | 20  | 0 (0)                        | 3 (0.2)  | 1 (0.1)  | 0 (0) | 0 (0)       | 0 (0)                  | 0 (0)       | 0 (0)                    | 0 (0)               | 0 (0) |
| large_intestine                    | 36  | 0 (0)                        | 2 (0.1)  | 1 (0)    | 0 (0) | 0 (0)       | 0 (0)                  | 0 (0)       | 0 (0)                    | 0 (0)               | 0 (0) |
| liver                              | 8   | 0 (0)                        | 0 (0)    | 1 (0.1)  | 0 (0) | 0 (0)       | 0 (0)                  | 1 (0.1)     | 0 (0)                    | 0 (0)               | 0 (0) |
| lung                               | 145 | 0 (0)                        | 23 (0.2) | 12 (0.1) | 0 (0) | 0 (0)       | 0 (0)                  | 2 (0)       | 0 (0)                    | 0 (0)               | 0 (0) |
| oesophagus                         | 21  | 0 (0)                        | 3 (0.1)  | 0 (0)    | 0 (0) | 0 (0)       | 0 (0)                  | 2 (0.1)     | 0 (0)                    | 0 (0)               | 0 (0) |
| ovary                              | 22  | 0 (0)                        | 4 (0.2)  | 1 (0)    | 0 (0) | 0 (0)       | 0 (0)                  | 0 (0)       | 0 (0)                    | 0 (0)               | 0 (0) |
| pancreas                           | 17  | 0 (0)                        | 2 (0.1)  | 0 (0)    | 0 (0) | 0 (0)       | 0 (0)                  | 0 (0)       | 0 (0)                    | 0 (0)               | 0 (0) |
| placenta                           | 2   | 0 (0)                        | 0 (0)    | 0 (0)    | 0 (0) | 0 (0)       | 0 (0)                  | 0 (0)       | 0 (0)                    | 0 (0)               | 0 (0) |
| pleura                             | 5   | 0 (0)                        | 1 (0.2)  | 0 (0)    | 0 (0) | 0 (0)       | 0 (0)                  | 0 (0)       | 0 (0)                    | 0 (0)               | 0 (0) |
| prostate                           | 5   | 0 (0)                        | 0 (0)    | 0 (0)    | 0 (0) | 0 (0)       | 0 (0)                  | 0 (0)       | 0 (0)                    | 0 (0)               | 0 (0) |
| skin                               | 51  | 0 (0)                        | 4 (0.1)  | 0 (0)    | 0 (0) | 0 (0)       | 0 (0)                  | 1 (0)       | 0 (0)                    | 0 (0)               | 0 (0) |
| small_intestine                    | 1   | 0 (0)                        | 0 (0)    | 0 (0)    | 0 (0) | 0 (0)       | 0 (0)                  | 0 (0)       | 0 (0)                    | 0 (0)               | 0 (0) |
| soft_tissue                        | 19  | 0 (0)                        | 3 (0.2)  | 0 (0)    | 0 (0) | 0 (0)       | 0 (0)                  | 1 (0.1)     | 0 (0)                    | 0 (0)               | 0 (0) |
| stomach                            | 21  | 0 (0)                        | 4 (0.2)  | 0 (0)    | 0 (0) | 0 (0)       | 0 (0)                  | 0 (0)       | 0 (0)                    | 0 (0)               | 0 (0) |
| testis                             | 3   | 0 (0)                        | 1 (0.3)  | 0 (0)    | 0 (0) | 0 (0)       | 0 (0)                  | 0 (0)       | 0 (0)                    | 0 (0)               | 0 (0) |
| thyroid                            | 11  | 0 (0)                        | 0 (0)    | 1 (0.1)  | 0 (0) | 0 (0)       | 0 (0)                  | 0 (0)       | 0 (0)                    | 0 (0)               | 0 (0) |
| not specified                      | 1   | 0 (0)                        | 0 (0)    | 0 (0)    | 0 (0) | 0 (0)       | 0 (0)                  | 0 (0)       | 0 (0)                    | 0 (0)               | 0 (0) |
| upper_aerodigestive_tract          | 20  | 0 (0)                        | 2 (0.1)  | 1 (0.1)  | 0 (0) | 0 (0)       | 0 (0)                  | 0 (0)       | 0 (0)                    | 0 (0)               | 0 (0) |
| urinary_tract                      | 16  | 0 (0)                        | 4 (0.3)  | 0 (0)    | 0 (0) | 0 (0)       | 0 (0)                  | 0 (0)       | 0 (0)                    | 0 (0)               | 0 (0) |
| vulva                              | 3   | 0 (0)                        | 1 (0.3)  | 1 (0.3)  | 0 (0) | 0 (0)       | 0 (0)                  | 0 (0)       | 0 (0)                    | 0 (0)               | 0 (0) |

PALB2 (KCG)

| Cancer Cell lines                  |     | Somatic hemizygous deletions |          |         |          | Somatic HDs | Somatic Amplifications | Breakpoints | Known Cancer Gene Screen |                     | HDs   |
|------------------------------------|-----|------------------------------|----------|---------|----------|-------------|------------------------|-------------|--------------------------|---------------------|-------|
| Tissue                             | №   | <1Mb                         | >1Mb     | Arm     | Chr      |             |                        |             | Point Mutations LOM      | Point Mutations TOV |       |
| adrenal_gland                      | 2   | 0 (0)                        | 0 (0)    | 0 (0)   | 0 (0)    | 0 (0)       | 0 (0)                  | 0 (0)       | 0 (0)                    | 0 (0)               | 0 (0) |
| autonomic_ganglia                  | 36  | 0 (0)                        | 0 (0)    | 0 (0)   | 0 (0)    | 0 (0)       | 0 (0)                  | 0 (0)       | 0 (0)                    | 0 (0)               | 0 (0) |
| biliary_tract                      | 6   | 0 (0)                        | 3 (0.5)  | 0 (0)   | 0 (0)    | 0 (0)       | 0 (0)                  | 0 (0)       | 0 (0)                    | 0 (0)               | 0 (0) |
| bone                               | 32  | 0 (0)                        | 1 (0)    | 0 (0)   | 1 (0)    | 0 (0)       | 0 (0)                  | 0 (0)       | 0 (0)                    | 0 (0)               | 0 (0) |
| breast                             | 42  | 1 (0)                        | 5 (0.1)  | 2 (0)   | 1 (0)    | 0 (0)       | 0 (0)                  | 0 (0)       | 0 (0)                    | 0 (0)               | 0 (0) |
| central_nervous_system             | 55  | 0 (0)                        | 2 (0)    | 0 (0)   | 0 (0)    | 0 (0)       | 0 (0)                  | 0 (0)       | 0 (0)                    | 0 (0)               | 0 (0) |
| cervix                             | 11  | 0 (0)                        | 0 (0)    | 1 (0.1) | 0 (0)    | 0 (0)       | 0 (0)                  | 0 (0)       | 0 (0)                    | 0 (0)               | 0 (0) |
| endometrium                        | 9   | 0 (0)                        | 1 (0.1)  | 0 (0)   | 0 (0)    | 0 (0)       | 0 (0)                  | 0 (0)       | 0 (0)                    | 0 (0)               | 0 (0) |
| eye                                | 1   | 0 (0)                        | 0 (0)    | 0 (0)   | 0 (0)    | 0 (0)       | 0 (0)                  | 0 (0)       | 0 (0)                    | 0 (0)               | 0 (0) |
| gastrointestinal_tract             | 1   | 0 (0)                        | 0 (0)    | 0 (0)   | 0 (0)    | 0 (0)       | 0 (0)                  | 0 (0)       | 0 (0)                    | 0 (0)               | 0 (0) |
| haematopoietic_and_lymphoid_tissue | 124 | 0 (0)                        | 3 (0)    | 0 (0)   | 2 (0)    | 0 (0)       | 0 (0)                  | 0 (0)       | 0 (0)                    | 2 (0)               | 0 (0) |
| kidney                             | 20  | 0 (0)                        | 0 (0)    | 0 (0)   | 3 (0.2)  | 0 (0)       | 0 (0)                  | 0 (0)       | 0 (0)                    | 0 (0)               | 0 (0) |
| large_intestine                    | 36  | 0 (0)                        | 0 (0)    | 0 (0)   | 0 (0)    | 0 (0)       | 0 (0)                  | 0 (0)       | 0 (0)                    | 0 (0)               | 0 (0) |
| liver                              | 8   | 0 (0)                        | 1 (0.1)  | 0 (0)   | 2 (0.3)  | 0 (0)       | 0 (0)                  | 0 (0)       | 0 (0)                    | 0 (0)               | 0 (0) |
| lung                               | 145 | 0 (0)                        | 15 (0.1) | 5 (0)   | 11 (0.1) | 0 (0)       | 0 (0)                  | 0 (0)       | 0 (0)                    | 1 (0)               | 0 (0) |
| oesophagus                         | 21  | 0 (0)                        | 3 (0.1)  | 0 (0)   | 2 (0.1)  | 0 (0)       | 0 (0)                  | 0 (0)       | 0 (0)                    | 1 (0)               | 0 (0) |
| ovary                              | 22  | 0 (0)                        | 2 (0.1)  | 1 (0)   | 2 (0.1)  | 0 (0)       | 0 (0)                  | 0 (0)       | 0 (0)                    | 0 (0)               | 0 (0) |
| pancreas                           | 17  | 0 (0)                        | 3 (0.2)  | 0 (0)   | 1 (0.1)  | 0 (0)       | 0 (0)                  | 0 (0)       | 0 (0)                    | 0 (0)               | 0 (0) |
| placenta                           | 2   | 0 (0)                        | 0 (0)    | 0 (0)   | 0 (0)    | 0 (0)       | 0 (0)                  | 0 (0)       | 0 (0)                    | 0 (0)               | 0 (0) |
| pleura                             | 5   | 0 (0)                        | 0 (0)    | 0 (0)   | 0 (0)    | 0 (0)       | 0 (0)                  | 0 (0)       | 0 (0)                    | 0 (0)               | 0 (0) |
| prostate                           | 5   | 0 (0)                        | 1 (0.2)  | 0 (0)   | 1 (0.2)  | 0 (0)       | 0 (0)                  | 0 (0)       | 0 (0)                    | 0 (0)               | 0 (0) |
| skin                               | 51  | 0 (0)                        | 4 (0.1)  | 1 (0)   | 0 (0)    | 0 (0)       | 0 (0)                  | 1 (0)       | 0 (0)                    | 0 (0)               | 0 (0) |
| small_intestine                    | 1   | 0 (0)                        | 0 (0)    | 0 (0)   | 0 (0)    | 0 (0)       | 0 (0)                  | 0 (0)       | 0 (0)                    | 0 (0)               | 0 (0) |
| soft_tissue                        | 19  | 0 (0)                        | 1 (0.1)  | 0 (0)   | 0 (0)    | 0 (0)       | 0 (0)                  | 0 (0)       | 0 (0)                    | 0 (0)               | 0 (0) |
| stomach                            | 21  | 0 (0)                        | 2 (0.1)  | 0 (0)   | 1 (0)    | 0 (0)       | 0 (0)                  | 0 (0)       | 0 (0)                    | 0 (0)               | 0 (0) |
| testis                             | 3   | 0 (0)                        | 0 (0)    | 0 (0)   | 1 (0.3)  | 0 (0)       | 0 (0)                  | 0 (0)       | 0 (0)                    | 0 (0)               | 0 (0) |
| thyroid                            | 11  | 0 (0)                        | 3 (0.3)  | 0 (0)   | 1 (0.1)  | 0 (0)       | 0 (0)                  | 0 (0)       | 0 (0)                    | 0 (0)               | 0 (0) |
| not specified                      | 1   | 0 (0)                        | 0 (0)    | 0 (0)   | 0 (0)    | 0 (0)       | 0 (0)                  | 0 (0)       | 0 (0)                    | 0 (0)               | 0 (0) |
| upper_aerodigestive_tract          | 20  | 0 (0)                        | 1 (0.1)  | 0 (0)   | 0 (0)    | 0 (0)       | 0 (0)                  | 0 (0)       | 0 (0)                    | 0 (0)               | 0 (0) |
| urinary_tract                      | 16  | 0 (0)                        | 1 (0.1)  | 0 (0)   | 1 (0.1)  | 0 (0)       | 0 (0)                  | 0 (0)       | 0 (0)                    | 0 (0)               | 0 (0) |
| vulva                              | 3   | 0 (0)                        | 0 (0)    | 0 (0)   | 0 (0)    | 0 (0)       | 0 (0)                  | 0 (0)       | 0 (0)                    | 0 (0)               | 0 (0) |

PDGFRA (KCG)

| Cancer Cell lines                  |     | Somatic hemizygous deletions |          |         |         | Somatic HDs | Somatic Amplifications | Breakpoints | Known Cancer Gene Screen |                     |       |
|------------------------------------|-----|------------------------------|----------|---------|---------|-------------|------------------------|-------------|--------------------------|---------------------|-------|
| Tissue                             | №   | <1Mb                         | >1Mb     | Arm     | Chr     |             |                        |             | Point Mutations LOM      | Point Mutations TOV | HDs   |
| adrenal_gland                      | 2   | 0 (0)                        | 0 (0)    | 0 (0)   | 0 (0)   | 0 (0)       | 0 (0)                  | 0 (0)       | 0 (0)                    | 0 (0)               | 0 (0) |
| autonomic_ganglia                  | 36  | 0 (0)                        | 1 (0)    | 0 (0)   | 0 (0)   | 0 (0)       | 0 (0)                  | 0 (0)       | 0 (0)                    | 0 (0)               | 0 (0) |
| biliary_tract                      | 6   | 0 (0)                        | 0 (0)    | 0 (0)   | 0 (0)   | 0 (0)       | 0 (0)                  | 0 (0)       | 0 (0)                    | 0 (0)               | 0 (0) |
| bone                               | 32  | 0 (0)                        | 2 (0.1)  | 0 (0)   | 1 (0)   | 0 (0)       | 0 (0)                  | 0 (0)       | 0 (0)                    | 0 (0)               | 0 (0) |
| breast                             | 42  | 0 (0)                        | 3 (0.1)  | 0 (0)   | 4 (0.1) | 0 (0)       | 0 (0)                  | 0 (0)       | 0 (0)                    | 0 (0)               | 0 (0) |
| central_nervous_system             | 55  | 0 (0)                        | 2 (0)    | 1 (0)   | 1 (0)   | 0 (0)       | 0 (0)                  | 1 (0)       | 0 (0)                    | 0 (0)               | 0 (0) |
| cervix                             | 11  | 0 (0)                        | 1 (0.1)  | 0 (0)   | 1 (0.1) | 0 (0)       | 0 (0)                  | 0 (0)       | 0 (0)                    | 0 (0)               | 0 (0) |
| endometrium                        | 9   | 0 (0)                        | 0 (0)    | 0 (0)   | 0 (0)   | 0 (0)       | 0 (0)                  | 0 (0)       | 0 (0)                    | 0 (0)               | 0 (0) |
| eye                                | 1   | 0 (0)                        | 0 (0)    | 0 (0)   | 0 (0)   | 0 (0)       | 0 (0)                  | 0 (0)       | 0 (0)                    | 0 (0)               | 0 (0) |
| gastrointestinal_tract             | 1   | 0 (0)                        | 0 (0)    | 0 (0)   | 0 (0)   | 0 (0)       | 0 (0)                  | 0 (0)       | 0 (0)                    | 0 (0)               | 0 (0) |
| haematopoietic_and_lymphoid_tissue | 124 | 1 (0)                        | 5 (0)    | 0 (0)   | 0 (0)   | 0 (0)       | 0 (0)                  | 1 (0)       | 0 (0)                    | 0 (0)               | 0 (0) |
| kidney                             | 20  | 0 (0)                        | 0 (0)    | 2 (0.1) | 1 (0.1) | 0 (0)       | 0 (0)                  | 0 (0)       | 0 (0)                    | 0 (0)               | 0 (0) |
| large_intestine                    | 36  | 0 (0)                        | 2 (0.1)  | 0 (0)   | 1 (0)   | 0 (0)       | 0 (0)                  | 1 (0)       | 0 (0)                    | 0 (0)               | 0 (0) |
| liver                              | 8   | 0 (0)                        | 0 (0)    | 0 (0)   | 0 (0)   | 0 (0)       | 0 (0)                  | 0 (0)       | 0 (0)                    | 0 (0)               | 0 (0) |
| lung                               | 145 | 0 (0)                        | 12 (0.1) | 3 (0)   | 2 (0)   | 0 (0)       | 1 (0)                  | 0 (0)       | 0 (0)                    | 0 (0)               | 0 (0) |
| oesophagus                         | 21  | 0 (0)                        | 1 (0)    | 0 (0)   | 1 (0)   | 0 (0)       | 0 (0)                  | 0 (0)       | 0 (0)                    | 0 (0)               | 0 (0) |
| ovary                              | 22  | 0 (0)                        | 0 (0)    | 0 (0)   | 0 (0)   | 0 (0)       | 0 (0)                  | 0 (0)       | 0 (0)                    | 0 (0)               | 0 (0) |
| pancreas                           | 17  | 0 (0)                        | 0 (0)    | 0 (0)   | 1 (0.1) | 0 (0)       | 0 (0)                  | 0 (0)       | 0 (0)                    | 0 (0)               | 0 (0) |
| placenta                           | 2   | 0 (0)                        | 0 (0)    | 0 (0)   | 0 (0)   | 0 (0)       | 0 (0)                  | 0 (0)       | 0 (0)                    | 0 (0)               | 0 (0) |
| pleura                             | 5   | 0 (0)                        | 1 (0.2)  | 1 (0.2) | 0 (0)   | 0 (0)       | 0 (0)                  | 0 (0)       | 0 (0)                    | 0 (0)               | 0 (0) |
| prostate                           | 5   | 0 (0)                        | 0 (0)    | 0 (0)   | 0 (0)   | 0 (0)       | 0 (0)                  | 0 (0)       | 0 (0)                    | 0 (0)               | 0 (0) |
| skin                               | 51  | 0 (0)                        | 1 (0)    | 0 (0)   | 2 (0)   | 0 (0)       | 0 (0)                  | 0 (0)       | 0 (0)                    | 0 (0)               | 0 (0) |
| small_intestine                    | 1   | 0 (0)                        | 0 (0)    | 0 (0)   | 0 (0)   | 0 (0)       | 0 (0)                  | 0 (0)       | 0 (0)                    | 0 (0)               | 0 (0) |
| soft_tissue                        | 19  | 0 (0)                        | 1 (0.1)  | 0 (0)   | 1 (0.1) | 0 (0)       | 0 (0)                  | 0 (0)       | 0 (0)                    | 0 (0)               | 0 (0) |
| stomach                            | 21  | 0 (0)                        | 2 (0.1)  | 1 (0)   | 0 (0)   | 0 (0)       | 0 (0)                  | 0 (0)       | 0 (0)                    | 0 (0)               | 0 (0) |
| testis                             | 3   | 0 (0)                        | 0 (0)    | 0 (0)   | 0 (0)   | 0 (0)       | 0 (0)                  | 0 (0)       | 0 (0)                    | 0 (0)               | 0 (0) |
| thyroid                            | 11  | 1 (0.1)                      | 1 (0.1)  | 0 (0)   | 0 (0)   | 0 (0)       | 1 (0.1)                | 1 (0.1)     | 0 (0)                    | 0 (0)               | 0 (0) |
| not specified                      | 1   | 0 (0)                        | 0 (0)    | 0 (0)   | 0 (0)   | 0 (0)       | 0 (0)                  | 0 (0)       | 0 (0)                    | 0 (0)               | 0 (0) |
| upper_aerodigestive_tract          | 20  | 0 (0)                        | 1 (0.1)  | 1 (0.1) | 0 (0)   | 0 (0)       | 0 (0)                  | 1 (0.1)     | 0 (0)                    | 0 (0)               | 0 (0) |
| urinary_tract                      | 16  | 0 (0)                        | 1 (0.1)  | 0 (0)   | 0 (0)   | 0 (0)       | 0 (0)                  | 0 (0)       | 0 (0)                    | 0 (0)               | 0 (0) |
| vulva                              | 3   | 0 (0)                        | 1 (0.3)  | 0 (0)   | 0 (0)   | 0 (0)       | 0 (0)                  | 0 (0)       | 0 (0)                    | 0 (0)               | 0 (0) |

**PHOX2B (KCG)**

| Cancer Cell lines                  |     | Somatic hemizygous deletions |         |         |         | Somatic HDs | Somatic Amplifications | Breakpoints | Known Cancer Gene Screen |                     |       |
|------------------------------------|-----|------------------------------|---------|---------|---------|-------------|------------------------|-------------|--------------------------|---------------------|-------|
| Tissue                             | №   | <1Mb                         | >1Mb    | Arm     | Chr     |             |                        |             | Point Mutations LOM      | Point Mutations TOV | HDs   |
| adrenal_gland                      | 2   | 0 (0)                        | 0 (0)   | 0 (0)   | 0 (0)   | 0 (0)       | 0 (0)                  | 0 (0)       | 0 (0)                    | 0 (0)               | 0 (0) |
| autonomic_ganglia                  | 36  | 0 (0)                        | 0 (0)   | 0 (0)   | 0 (0)   | 0 (0)       | 0 (0)                  | 0 (0)       | 0 (0)                    | 0 (0)               | 0 (0) |
| biliary_tract                      | 6   | 0 (0)                        | 1 (0.2) | 0 (0)   | 0 (0)   | 0 (0)       | 0 (0)                  | 0 (0)       | 0 (0)                    | 0 (0)               | 0 (0) |
| bone                               | 32  | 0 (0)                        | 3 (0.1) | 0 (0)   | 1 (0)   | 0 (0)       | 0 (0)                  | 0 (0)       | 0 (0)                    | 0 (0)               | 0 (0) |
| breast                             | 42  | 0 (0)                        | 2 (0)   | 2 (0)   | 4 (0.1) | 0 (0)       | 0 (0)                  | 0 (0)       | 0 (0)                    | 0 (0)               | 0 (0) |
| central_nervous_system             | 55  | 0 (0)                        | 2 (0)   | 0 (0)   | 1 (0)   | 0 (0)       | 0 (0)                  | 0 (0)       | 0 (0)                    | 0 (0)               | 0 (0) |
| cervix                             | 11  | 0 (0)                        | 0 (0)   | 3 (0.3) | 1 (0.1) | 0 (0)       | 0 (0)                  | 0 (0)       | 0 (0)                    | 0 (0)               | 0 (0) |
| endometrium                        | 9   | 0 (0)                        | 0 (0)   | 0 (0)   | 0 (0)   | 0 (0)       | 0 (0)                  | 0 (0)       | 0 (0)                    | 0 (0)               | 0 (0) |
| eye                                | 1   | 0 (0)                        | 0 (0)   | 0 (0)   | 0 (0)   | 0 (0)       | 0 (0)                  | 0 (0)       | 0 (0)                    | 0 (0)               | 0 (0) |
| gastrointestinal_tract             | 1   | 0 (0)                        | 0 (0)   | 0 (0)   | 0 (0)   | 0 (0)       | 0 (0)                  | 0 (0)       | 0 (0)                    | 0 (0)               | 0 (0) |
| haematopoietic_and_lymphoid_tissue | 124 | 0 (0)                        | 3 (0)   | 0 (0)   | 0 (0)   | 0 (0)       | 0 (0)                  | 0 (0)       | 0 (0)                    | 0 (0)               | 0 (0) |
| kidney                             | 20  | 0 (0)                        | 0 (0)   | 0 (0)   | 1 (0.1) | 0 (0)       | 0 (0)                  | 0 (0)       | 0 (0)                    | 0 (0)               | 0 (0) |
| large_intestine                    | 36  | 0 (0)                        | 2 (0.1) | 1 (0)   | 1 (0)   | 0 (0)       | 0 (0)                  | 0 (0)       | 0 (0)                    | 1 (0)               | 0 (0) |
| liver                              | 8   | 0 (0)                        | 1 (0.1) | 0 (0)   | 0 (0)   | 0 (0)       | 0 (0)                  | 0 (0)       | 0 (0)                    | 0 (0)               | 0 (0) |
| lung                               | 145 | 0 (0)                        | 9 (0.1) | 3 (0)   | 2 (0)   | 0 (0)       | 0 (0)                  | 0 (0)       | 0 (0)                    | 0 (0)               | 0 (0) |
| oesophagus                         | 21  | 0 (0)                        | 4 (0.2) | 0 (0)   | 1 (0)   | 0 (0)       | 0 (0)                  | 0 (0)       | 0 (0)                    | 0 (0)               | 0 (0) |
| ovary                              | 22  | 0 (0)                        | 0 (0)   | 1 (0)   | 0 (0)   | 0 (0)       | 0 (0)                  | 0 (0)       | 0 (0)                    | 0 (0)               | 0 (0) |
| pancreas                           | 17  | 0 (0)                        | 0 (0)   | 0 (0)   | 1 (0.1) | 0 (0)       | 0 (0)                  | 0 (0)       | 0 (0)                    | 0 (0)               | 0 (0) |
| placenta                           | 2   | 0 (0)                        | 0 (0)   | 0 (0)   | 0 (0)   | 0 (0)       | 0 (0)                  | 0 (0)       | 0 (0)                    | 0 (0)               | 0 (0) |
| pleura                             | 5   | 0 (0)                        | 0 (0)   | 0 (0)   | 0 (0)   | 0 (0)       | 0 (0)                  | 0 (0)       | 0 (0)                    | 0 (0)               | 0 (0) |
| prostate                           | 5   | 0 (0)                        | 1 (0.2) | 0 (0)   | 0 (0)   | 0 (0)       | 0 (0)                  | 0 (0)       | 0 (0)                    | 0 (0)               | 0 (0) |
| skin                               | 51  | 0 (0)                        | 5 (0.1) | 0 (0)   | 2 (0)   | 0 (0)       | 0 (0)                  | 0 (0)       | 0 (0)                    | 0 (0)               | 0 (0) |
| small_intestine                    | 1   | 0 (0)                        | 0 (0)   | 0 (0)   | 0 (0)   | 0 (0)       | 0 (0)                  | 0 (0)       | 0 (0)                    | 0 (0)               | 0 (0) |
| soft_tissue                        | 19  | 0 (0)                        | 1 (0.1) | 0 (0)   | 1 (0.1) | 0 (0)       | 0 (0)                  | 0 (0)       | 0 (0)                    | 0 (0)               | 0 (0) |
| stomach                            | 21  | 0 (0)                        | 3 (0.1) | 2 (0.1) | 0 (0)   | 0 (0)       | 0 (0)                  | 0 (0)       | 0 (0)                    | 0 (0)               | 0 (0) |
| testis                             | 3   | 0 (0)                        | 0 (0)   | 0 (0)   | 0 (0)   | 0 (0)       | 0 (0)                  | 0 (0)       | 0 (0)                    | 0 (0)               | 0 (0) |
| thyroid                            | 11  | 0 (0)                        | 1 (0.1) | 0 (0)   | 0 (0)   | 0 (0)       | 0 (0)                  | 0 (0)       | 0 (0)                    | 0 (0)               | 0 (0) |
| not specified                      | 1   | 0 (0)                        | 0 (0)   | 0 (0)   | 0 (0)   | 0 (0)       | 0 (0)                  | 0 (0)       | 0 (0)                    | 0 (0)               | 0 (0) |
| upper_aerodigestive_tract          | 20  | 0 (0)                        | 1 (0.1) | 2 (0.1) | 0 (0)   | 0 (0)       | 0 (0)                  | 0 (0)       | 0 (0)                    | 0 (0)               | 0 (0) |
| urinary_tract                      | 16  | 0 (0)                        | 0 (0)   | 0 (0)   | 0 (0)   | 0 (0)       | 0 (0)                  | 0 (0)       | 0 (0)                    | 0 (0)               | 0 (0) |
| vulva                              | 3   | 0 (0)                        | 0 (0)   | 0 (0)   | 0 (0)   | 0 (0)       | 0 (0)                  | 0 (0)       | 0 (0)                    | 0 (0)               | 0 (0) |

**PIK3CA (KCG)**

| Cancer Cell lines                  |     | Somatic hemizygous deletions |          |         |         | Somatic HDs | Somatic Amplifications | Breakpoints | Known Cancer Gene Screen |                     |       |
|------------------------------------|-----|------------------------------|----------|---------|---------|-------------|------------------------|-------------|--------------------------|---------------------|-------|
| Tissue                             | №   | <1Mb                         | >1Mb     | Arm     | Chr     |             |                        |             | Point Mutations LOM      | Point Mutations TOV | HDs   |
| adrenal_gland                      | 2   | 0 (0)                        | 0 (0)    | 0 (0)   | 0 (0)   | 0 (0)       | 0 (0)                  | 0 (0)       | 0 (0)                    | 0 (0)               | 0 (0) |
| autonomic_ganglia                  | 36  | 0 (0)                        | 0 (0)    | 0 (0)   | 0 (0)   | 0 (0)       | 0 (0)                  | 0 (0)       | 0 (0)                    | 0 (0)               | 0 (0) |
| biliary_tract                      | 6   | 0 (0)                        | 0 (0)    | 0 (0)   | 0 (0)   | 0 (0)       | 0 (0)                  | 0 (0)       | 1 (0.2)                  | 0 (0)               | 0 (0) |
| bone                               | 32  | 0 (0)                        | 5 (0.2)  | 1 (0)   | 1 (0)   | 0 (0)       | 0 (0)                  | 0 (0)       | 1 (0)                    | 0 (0)               | 0 (0) |
| breast                             | 42  | 0 (0)                        | 4 (0.1)  | 0 (0)   | 0 (0)   | 0 (0)       | 0 (0)                  | 1 (0)       | 13 (0.3)                 | 0 (0)               | 0 (0) |
| central_nervous_system             | 55  | 0 (0)                        | 3 (0.1)  | 0 (0)   | 1 (0)   | 0 (0)       | 0 (0)                  | 0 (0)       | 1 (0)                    | 0 (0)               | 0 (0) |
| cervix                             | 11  | 0 (0)                        | 0 (0)    | 0 (0)   | 1 (0.1) | 0 (0)       | 0 (0)                  | 0 (0)       | 3 (0.3)                  | 0 (0)               | 0 (0) |
| endometrium                        | 9   | 0 (0)                        | 0 (0)    | 0 (0)   | 0 (0)   | 0 (0)       | 0 (0)                  | 0 (0)       | 4 (0.4)                  | 0 (0)               | 0 (0) |
| eye                                | 1   | 0 (0)                        | 0 (0)    | 0 (0)   | 0 (0)   | 0 (0)       | 0 (0)                  | 0 (0)       | 0 (0)                    | 0 (0)               | 0 (0) |
| gastrointestinal_tract             | 1   | 0 (0)                        | 0 (0)    | 0 (0)   | 0 (0)   | 0 (0)       | 0 (0)                  | 0 (0)       | 0 (0)                    | 0 (0)               | 0 (0) |
| haematopoietic_and_lymphoid_tissue | 124 | 0 (0)                        | 3 (0)    | 0 (0)   | 1 (0)   | 0 (0)       | 0 (0)                  | 1 (0)       | 2 (0)                    | 0 (0)               | 0 (0) |
| kidney                             | 20  | 0 (0)                        | 0 (0)    | 0 (0)   | 0 (0)   | 0 (0)       | 0 (0)                  | 0 (0)       | 1 (0.1)                  | 0 (0)               | 0 (0) |
| large_intestine                    | 36  | 0 (0)                        | 3 (0.1)  | 0 (0)   | 1 (0)   | 0 (0)       | 0 (0)                  | 0 (0)       | 9 (0.3)                  | 0 (0)               | 0 (0) |
| liver                              | 8   | 0 (0)                        | 2 (0.3)  | 1 (0.1) | 0 (0)   | 0 (0)       | 0 (0)                  | 1 (0.1)     | 0 (0)                    | 0 (0)               | 0 (0) |
| lung                               | 145 | 1 (0)                        | 12 (0.1) | 0 (0)   | 6 (0)   | 0 (0)       | 0 (0)                  | 2 (0)       | 9 (0.1)                  | 0 (0)               | 0 (0) |
| oesophagus                         | 21  | 0 (0)                        | 3 (0.1)  | 1 (0)   | 0 (0)   | 0 (0)       | 1 (0)                  | 0 (0)       | 2 (0.1)                  | 0 (0)               | 0 (0) |
| ovary                              | 22  | 0 (0)                        | 1 (0)    | 0 (0)   | 0 (0)   | 0 (0)       | 0 (0)                  | 0 (0)       | 2 (0.1)                  | 0 (0)               | 0 (0) |
| pancreas                           | 17  | 0 (0)                        | 2 (0.1)  | 0 (0)   | 0 (0)   | 0 (0)       | 0 (0)                  | 0 (0)       | 0 (0)                    | 0 (0)               | 0 (0) |
| placenta                           | 2   | 0 (0)                        | 0 (0)    | 0 (0)   | 0 (0)   | 0 (0)       | 0 (0)                  | 0 (0)       | 0 (0)                    | 0 (0)               | 0 (0) |
| pleura                             | 5   | 0 (0)                        | 1 (0.2)  | 0 (0)   | 0 (0)   | 0 (0)       | 0 (0)                  | 0 (0)       | 0 (0)                    | 0 (0)               | 0 (0) |
| prostate                           | 5   | 0 (0)                        | 0 (0)    | 0 (0)   | 0 (0)   | 0 (0)       | 0 (0)                  | 0 (0)       | 1 (0.2)                  | 0 (0)               | 0 (0) |
| skin                               | 51  | 0 (0)                        | 2 (0)    | 0 (0)   | 0 (0)   | 0 (0)       | 0 (0)                  | 0 (0)       | 0 (0)                    | 0 (0)               | 0 (0) |
| small_intestine                    | 1   | 0 (0)                        | 0 (0)    | 0 (0)   | 0 (0)   | 0 (0)       | 0 (0)                  | 0 (0)       | 0 (0)                    | 0 (0)               | 0 (0) |
| soft_tissue                        | 19  | 0 (0)                        | 3 (0.2)  | 0 (0)   | 0 (0)   | 0 (0)       | 0 (0)                  | 0 (0)       | 1 (0.1)                  | 0 (0)               | 0 (0) |
| stomach                            | 21  | 0 (0)                        | 3 (0.1)  | 0 (0)   | 1 (0)   | 0 (0)       | 0 (0)                  | 0 (0)       | 4 (0.2)                  | 0 (0)               | 0 (0) |
| testis                             | 3   | 0 (0)                        | 0 (0)    | 0 (0)   | 0 (0)   | 0 (0)       | 0 (0)                  | 0 (0)       | 0 (0)                    | 0 (0)               | 0 (0) |
| thyroid                            | 11  | 0 (0)                        | 0 (0)    | 0 (0)   | 1 (0.1) | 0 (0)       | 0 (0)                  | 0 (0)       | 1 (0.1)                  | 0 (0)               | 0 (0) |
| not specified                      | 1   | 0 (0)                        | 0 (0)    | 0 (0)   | 0 (0)   | 0 (0)       | 0 (0)                  | 0 (0)       | 1 (1)                    | 0 (0)               | 0 (0) |
| upper_aerodigestive_tract          | 20  | 0 (0)                        | 2 (0.1)  | 0 (0)   | 0 (0)   | 0 (0)       | 0 (0)                  | 1 (0.1)     | 2 (0.1)                  | 0 (0)               | 0 (0) |
| urinary_tract                      | 16  | 0 (0)                        | 2 (0.1)  | 0 (0)   | 0 (0)   | 0 (0)       | 0 (0)                  | 0 (0)       | 4 (0.3)                  | 0 (0)               | 0 (0) |
| vulva                              | 3   | 0 (0)                        | 0 (0)    | 0 (0)   | 0 (0)   | 0 (0)       | 0 (0)                  | 0 (0)       | 0 (0)                    | 0 (0)               | 0 (0) |

PTCH (KCG)

| Cancer Cell lines                  |     | Somatic hemizygous deletions |         |          |          | Somatic HDs | Somatic Amplifications | Breakpoints | Known Cancer Gene Screen |                     |       |
|------------------------------------|-----|------------------------------|---------|----------|----------|-------------|------------------------|-------------|--------------------------|---------------------|-------|
| Tissue                             | №   | <1Mb                         | >1Mb    | Arm      | Chr      |             |                        |             | Point Mutations LOM      | Point Mutations TOV | HDs   |
| adrenal_gland                      | 2   | 0 (0)                        | 0 (0)   | 0 (0)    | 0 (0)    | 0 (0)       | 0 (0)                  | 0 (0)       | 0 (0)                    | 0 (0)               | 0 (0) |
| autonomic_ganglia                  | 36  | 0 (0)                        | 0 (0)   | 1 (0)    | 0 (0)    | 0 (0)       | 0 (0)                  | 0 (0)       | 0 (0)                    | 0 (0)               | 0 (0) |
| biliary_tract                      | 6   | 0 (0)                        | 1 (0.2) | 1 (0.2)  | 2 (0.3)  | 0 (0)       | 0 (0)                  | 0 (0)       | 0 (0)                    | 0 (0)               | 0 (0) |
| bone                               | 32  | 0 (0)                        | 0 (0)   | 0 (0)    | 0 (0)    | 0 (0)       | 0 (0)                  | 0 (0)       | 0 (0)                    | 1 (0)               | 0 (0) |
| breast                             | 42  | 0 (0)                        | 3 (0.1) | 4 (0.1)  | 3 (0.1)  | 0 (0)       | 0 (0)                  | 0 (0)       | 0 (0)                    | 1 (0)               | 0 (0) |
| central_nervous_system             | 55  | 0 (0)                        | 1 (0)   | 1 (0)    | 0 (0)    | 0 (0)       | 0 (0)                  | 0 (0)       | 0 (0)                    | 0 (0)               | 0 (0) |
| cervix                             | 11  | 0 (0)                        | 0 (0)   | 0 (0)    | 1 (0.1)  | 0 (0)       | 0 (0)                  | 0 (0)       | 0 (0)                    | 0 (0)               | 0 (0) |
| endometrium                        | 9   | 0 (0)                        | 0 (0)   | 0 (0)    | 1 (0.1)  | 0 (0)       | 0 (0)                  | 0 (0)       | 0 (0)                    | 0 (0)               | 0 (0) |
| eye                                | 1   | 0 (0)                        | 0 (0)   | 0 (0)    | 0 (0)    | 0 (0)       | 0 (0)                  | 0 (0)       | 0 (0)                    | 0 (0)               | 0 (0) |
| gastrointestinal_tract             | 1   | 0 (0)                        | 1 (1)   | 0 (0)    | 0 (0)    | 0 (0)       | 0 (0)                  | 0 (0)       | 0 (0)                    | 0 (0)               | 0 (0) |
| haematopoietic_and_lymphoid_tissue | 124 | 0 (0)                        | 8 (0.1) | 5 (0)    | 1 (0)    | 0 (0)       | 0 (0)                  | 0 (0)       | 0 (0)                    | 0 (0)               | 0 (0) |
| kidney                             | 20  | 0 (0)                        | 1 (0.1) | 2 (0.1)  | 2 (0.1)  | 0 (0)       | 0 (0)                  | 0 (0)       | 0 (0)                    | 0 (0)               | 0 (0) |
| large_intestine                    | 36  | 0 (0)                        | 0 (0)   | 2 (0.1)  | 2 (0.1)  | 0 (0)       | 0 (0)                  | 0 (0)       | 0 (0)                    | 3 (0.1)             | 0 (0) |
| liver                              | 8   | 0 (0)                        | 0 (0)   | 0 (0)    | 0 (0)    | 0 (0)       | 0 (0)                  | 0 (0)       | 0 (0)                    | 0 (0)               | 0 (0) |
| lung                               | 145 | 1 (0)                        | 7 (0)   | 13 (0.1) | 19 (0.1) | 0 (0)       | 0 (0)                  | 3 (0)       | 0 (0)                    | 0 (0)               | 0 (0) |
| oesophagus                         | 21  | 0 (0)                        | 2 (0.1) | 1 (0)    | 3 (0.1)  | 0 (0)       | 0 (0)                  | 0 (0)       | 0 (0)                    | 0 (0)               | 0 (0) |
| ovary                              | 22  | 0 (0)                        | 2 (0.1) | 2 (0.1)  | 2 (0.1)  | 0 (0)       | 0 (0)                  | 0 (0)       | 0 (0)                    | 1 (0)               | 0 (0) |
| pancreas                           | 17  | 0 (0)                        | 0 (0)   | 1 (0.1)  | 3 (0.2)  | 0 (0)       | 0 (0)                  | 0 (0)       | 0 (0)                    | 0 (0)               | 0 (0) |
| placenta                           | 2   | 0 (0)                        | 0 (0)   | 0 (0)    | 0 (0)    | 0 (0)       | 0 (0)                  | 0 (0)       | 0 (0)                    | 0 (0)               | 0 (0) |
| pleura                             | 5   | 0 (0)                        | 0 (0)   | 0 (0)    | 0 (0)    | 0 (0)       | 0 (0)                  | 0 (0)       | 0 (0)                    | 0 (0)               | 0 (0) |
| prostate                           | 5   | 0 (0)                        | 0 (0)   | 0 (0)    | 0 (0)    | 0 (0)       | 0 (0)                  | 0 (0)       | 0 (0)                    | 0 (0)               | 0 (0) |
| skin                               | 51  | 0 (0)                        | 8 (0.2) | 4 (0.1)  | 2 (0)    | 0 (0)       | 0 (0)                  | 0 (0)       | 0 (0)                    | 0 (0)               | 0 (0) |
| small_intestine                    | 1   | 0 (0)                        | 0 (0)   | 0 (0)    | 0 (0)    | 0 (0)       | 0 (0)                  | 0 (0)       | 0 (0)                    | 0 (0)               | 0 (0) |
| soft_tissue                        | 19  | 0 (0)                        | 0 (0)   | 0 (0)    | 2 (0.1)  | 0 (0)       | 0 (0)                  | 0 (0)       | 0 (0)                    | 0 (0)               | 0 (0) |
| stomach                            | 21  | 1 (0)                        | 0 (0)   | 3 (0.1)  | 0 (0)    | 0 (0)       | 0 (0)                  | 1 (0)       | 0 (0)                    | 1 (0)               | 0 (0) |
| testis                             | 3   | 0 (0)                        | 0 (0)   | 2 (0.7)  | 1 (0.3)  | 0 (0)       | 0 (0)                  | 0 (0)       | 0 (0)                    | 0 (0)               | 0 (0) |
| thyroid                            | 11  | 0 (0)                        | 0 (0)   | 1 (0.1)  | 2 (0.2)  | 0 (0)       | 0 (0)                  | 0 (0)       | 0 (0)                    | 0 (0)               | 0 (0) |
| not specified                      | 1   | 0 (0)                        | 0 (0)   | 0 (0)    | 0 (0)    | 0 (0)       | 0 (0)                  | 0 (0)       | 0 (0)                    | 0 (0)               | 0 (0) |
| upper_aerodigestive_tract          | 20  | 0 (0)                        | 0 (0)   | 2 (0.1)  | 3 (0.2)  | 0 (0)       | 0 (0)                  | 0 (0)       | 0 (0)                    | 0 (0)               | 0 (0) |
| urinary_tract                      | 16  | 0 (0)                        | 0 (0)   | 2 (0.1)  | 1 (0.1)  | 0 (0)       | 0 (0)                  | 0 (0)       | 0 (0)                    | 0 (0)               | 0 (0) |
| vulva                              | 3   | 0 (0)                        | 0 (0)   | 0 (0)    | 0 (0)    | 0 (0)       | 0 (0)                  | 0 (0)       | 0 (0)                    | 0 (0)               | 0 (0) |

PTEN (KCG)

| Cancer Cell lines                  |     | Somatic hemizygous deletions |          |         |          | Somatic HDs | Somatic Amplifications | Breakpoints | Known Cancer Gene Screen |                     |         |
|------------------------------------|-----|------------------------------|----------|---------|----------|-------------|------------------------|-------------|--------------------------|---------------------|---------|
| Tissue                             | №   | <1Mb                         | >1Mb     | Arm     | Chr      |             |                        |             | Point Mutations LOM      | Point Mutations TOV | HDs     |
| adrenal_gland                      | 2   | 0 (0)                        | 0 (0)    | 0 (0)   | 0 (0)    | 0 (0)       | 0 (0)                  | 0 (0)       | 0 (0)                    | 0 (0)               | 0 (0)   |
| autonomic_ganglia                  | 36  | 0 (0)                        | 2 (0.1)  | 1 (0)   | 0 (0)    | 2 (0.1)     | 0 (0)                  | 1 (0)       | 1 (0)                    | 0 (0)               | 0 (0)   |
| biliary_tract                      | 6   | 0 (0)                        | 1 (0.2)  | 0 (0)   | 2 (0.3)  | 0 (0)       | 0 (0)                  | 1 (0.2)     | 0 (0)                    | 0 (0)               | 1 (0.2) |
| bone                               | 32  | 0 (0)                        | 4 (0.1)  | 1 (0)   | 4 (0.1)  | 2 (0.1)     | 0 (0)                  | 2 (0.1)     | 1 (0)                    | 0 (0)               | 2 (0.1) |
| breast                             | 42  | 0 (0)                        | 12 (0.3) | 1 (0)   | 3 (0.1)  | 1 (0)       | 0 (0)                  | 2 (0)       | 6 (0.1)                  | 3 (0.1)             | 1 (0)   |
| central_nervous_system             | 55  | 0 (0)                        | 4 (0.1)  | 1 (0)   | 23 (0.4) | 8 (0.1)     | 0 (0)                  | 3 (0.1)     | 19 (0.3)                 | 1 (0)               | 8 (0.1) |
| cervix                             | 11  | 0 (0)                        | 0 (0)    | 0 (0)   | 0 (0)    | 0 (0)       | 0 (0)                  | 0 (0)       | 0 (0)                    | 0 (0)               | 0 (0)   |
| endometrium                        | 9   | 0 (0)                        | 3 (0.3)  | 0 (0)   | 0 (0)    | 0 (0)       | 0 (0)                  | 0 (0)       | 3 (0.3)                  | 0 (0)               | 0 (0)   |
| eye                                | 1   | 0 (0)                        | 0 (0)    | 0 (0)   | 0 (0)    | 0 (0)       | 0 (0)                  | 0 (0)       | 0 (0)                    | 0 (0)               | 0 (0)   |
| gastrointestinal_tract             | 1   | 0 (0)                        | 0 (0)    | 0 (0)   | 1 (1)    | 0 (0)       | 0 (0)                  | 0 (0)       | 0 (0)                    | 0 (0)               | 0 (0)   |
| haematopoietic_and_lymphoid_tissue | 124 | 2 (0)                        | 13 (0.1) | 1 (0)   | 2 (0)    | 3 (0)       | 0 (0)                  | 6 (0)       | 11 (0.1)                 | 2 (0)               | 3 (0)   |
| kidney                             | 20  | 0 (0)                        | 1 (0.1)  | 0 (0)   | 2 (0.1)  | 1 (0.1)     | 0 (0)                  | 1 (0.1)     | 2 (0.1)                  | 0 (0)               | 1 (0.1) |
| large_intestine                    | 36  | 0 (0)                        | 1 (0)    | 0 (0)   | 1 (0)    | 0 (0)       | 0 (0)                  | 0 (0)       | 1 (0)                    | 1 (0)               | 0 (0)   |
| liver                              | 8   | 0 (0)                        | 1 (0.1)  | 1 (0.1) | 0 (0)    | 1 (0.1)     | 0 (0)                  | 1 (0.1)     | 0 (0)                    | 0 (0)               | 0 (0)   |
| lung                               | 145 | 0 (0)                        | 20 (0.1) | 2 (0)   | 22 (0.2) | 6 (0)       | 0 (0)                  | 6 (0)       | 7 (0)                    | 0 (0)               | 7 (0)   |
| oesophagus                         | 21  | 0 (0)                        | 2 (0.1)  | 2 (0.1) | 0 (0)    | 0 (0)       | 0 (0)                  | 0 (0)       | 0 (0)                    | 0 (0)               | 0 (0)   |
| ovary                              | 22  | 0 (0)                        | 3 (0.1)  | 1 (0)   | 1 (0)    | 0 (0)       | 0 (0)                  | 0 (0)       | 3 (0.1)                  | 1 (0)               | 0 (0)   |
| pancreas                           | 17  | 0 (0)                        | 3 (0.2)  | 0 (0)   | 1 (0.1)  | 0 (0)       | 0 (0)                  | 0 (0)       | 0 (0)                    | 0 (0)               | 0 (0)   |
| placenta                           | 2   | 0 (0)                        | 0 (0)    | 0 (0)   | 0 (0)    | 0 (0)       | 0 (0)                  | 0 (0)       | 0 (0)                    | 0 (0)               | 0 (0)   |
| pleura                             | 5   | 0 (0)                        | 0 (0)    | 0 (0)   | 0 (0)    | 0 (0)       | 0 (0)                  | 0 (0)       | 0 (0)                    | 0 (0)               | 0 (0)   |
| prostate                           | 5   | 0 (0)                        | 1 (0.2)  | 0 (0)   | 0 (0)    | 1 (0.2)     | 0 (0)                  | 1 (0.2)     | 1 (0.2)                  | 0 (0)               | 1 (0.2) |
| skin                               | 51  | 0 (0)                        | 5 (0.1)  | 0 (0)   | 13 (0.3) | 4 (0.1)     | 0 (0)                  | 6 (0.1)     | 3 (0.1)                  | 0 (0)               | 9 (0.2) |
| small_intestine                    | 1   | 0 (0)                        | 0 (0)    | 0 (0)   | 0 (0)    | 0 (0)       | 0 (0)                  | 0 (0)       | 0 (0)                    | 0 (0)               | 1 (1)   |
| soft_tissue                        | 19  | 0 (0)                        | 1 (0.1)  | 0 (0)   | 0 (0)    | 1 (0.1)     | 0 (0)                  | 0 (0)       | 1 (0.1)                  | 0 (0)               | 0 (0)   |
| stomach                            | 21  | 0 (0)                        | 1 (0)    | 1 (0)   | 2 (0.1)  | 1 (0)       | 0 (0)                  | 1 (0)       | 0 (0)                    | 0 (0)               | 1 (0)   |
| testis                             | 3   | 0 (0)                        | 0 (0)    | 1 (0.3) | 1 (0.3)  | 0 (0)       | 0 (0)                  | 0 (0)       | 1 (0.3)                  | 0 (0)               | 0 (0)   |
| thyroid                            | 11  | 0 (0)                        | 0 (0)    | 0 (0)   | 2 (0.2)  | 0 (0)       | 0 (0)                  | 0 (0)       | 1 (0.1)                  | 0 (0)               | 0 (0)   |
| not specified                      | 1   | 0 (0)                        | 0 (0)    | 0 (0)   | 0 (0)    | 0 (0)       | 0 (0)                  | 0 (0)       | 0 (0)                    | 0 (0)               | 0 (0)   |
| upper_aerodigestive_tract          | 20  | 0 (0)                        | 2 (0.1)  | 0 (0)   | 0 (0)    | 0 (0)       | 0 (0)                  | 0 (0)       | 1 (0.1)                  | 0 (0)               | 0 (0)   |
| urinary_tract                      | 16  | 0 (0)                        | 3 (0.2)  | 0 (0)   | 2 (0.1)  | 2 (0.1)     | 0 (0)                  | 1 (0.1)     | 0 (0)                    | 1 (0.1)             | 3 (0.2) |
| vulva                              | 3   | 0 (0)                        | 0 (0)    | 0 (0)   | 0 (0)    | 0 (0)       | 0 (0)                  | 0 (0)       | 0 (0)                    | 0 (0)               | 0 (0)   |

RB1 (KCG)

| Cancer Cell lines                  |     | Somatic hemizygous deletions |          |          |       | Somatic HDs | Somatic Amplifications | Breakpoints | Known Cancer Gene Screen |                     |         |
|------------------------------------|-----|------------------------------|----------|----------|-------|-------------|------------------------|-------------|--------------------------|---------------------|---------|
| Tissue                             | №   | <1Mb                         | >1Mb     | Arm      | Chr   |             |                        |             | Point Mutations LOM      | Point Mutations TOV | HDs     |
| adrenal_gland                      | 2   | 0 (0)                        | 0 (0)    | 0 (0)    | 0 (0) | 1 (0.5)     | 0 (0)                  | 1 (0.5)     | 0 (0)                    | 0(0)                | 1 (0.5) |
| autonomic_ganglia                  | 36  | 0 (0)                        | 4 (0.1)  | 3 (0.1)  | 0 (0) | 0 (0)       | 0 (0)                  | 0 (0)       | 0(0)                     | 0(0)                | 0 (0)   |
| biliary_tract                      | 6   | 0 (0)                        | 1 (0.2)  | 0 (0)    | 0 (0) | 0 (0)       | 0 (0)                  | 0 (0)       | 1(0.2)                   | 0(0)                | 0 (0)   |
| bone                               | 32  | 0 (0)                        | 1 (0)    | 5 (0.2)  | 0 (0) | 2 (0.1)     | 0 (0)                  | 3 (0.1)     | 1(0)                     | 0(0)                | 3 (0.1) |
| breast                             | 42  | 0 (0)                        | 7 (0.2)  | 11 (0.3) | 0 (0) | 4 (0.1)     | 0 (0)                  | 5 (0.1)     | 2(0)                     | 0(0)                | 5 (0.1) |
| central_nervous_system             | 55  | 0 (0)                        | 10 (0.2) | 13 (0.2) | 0 (0) | 1 (0)       | 0 (0)                  | 1 (0)       | 8(0.1)                   | 0(0)                | 2 (0)   |
| cervix                             | 11  | 0 (0)                        | 0 (0)    | 3 (0.3)  | 0 (0) | 0 (0)       | 0 (0)                  | 0 (0)       | 0(0)                     | 0(0)                | 0 (0)   |
| endometrium                        | 9   | 0 (0)                        | 0 (0)    | 1 (0.1)  | 0 (0) | 1 (0.1)     | 0 (0)                  | 0 (0)       | 1(0.1)                   | 0(0)                | 1 (0.1) |
| eye                                | 1   | 0 (0)                        | 0 (0)    | 0 (0)    | 0 (0) | 1 (1)       | 0 (0)                  | 0 (0)       | 0(0)                     | 0(0)                | 1 (1)   |
| gastrointestinal_tract             | 1   | 0 (0)                        | 0 (0)    | 1 (1)    | 0 (0) | 0 (0)       | 0 (0)                  | 0 (0)       | 1(1)                     | 0(0)                | 0 (0)   |
| haematopoietic_and_lymphoid_tissue | 124 | 1 (0)                        | 9 (0.1)  | 7 (0.1)  | 0 (0) | 4 (0)       | 0 (0)                  | 5 (0)       | 4(0)                     | 0(0)                | 4 (0)   |
| kidney                             | 20  | 0 (0)                        | 0 (0)    | 4 (0.2)  | 0 (0) | 0 (0)       | 0 (0)                  | 0 (0)       | 0(0)                     | 0(0)                | 0 (0)   |
| large_intestine                    | 36  | 0 (0)                        | 1 (0)    | 4 (0.1)  | 0 (0) | 0 (0)       | 1 (0)                  | 0 (0)       | 0(0)                     | 1(0)                | 0 (0)   |
| liver                              | 8   | 0 (0)                        | 2 (0.3)  | 1 (0.1)  | 0 (0) | 1 (0.1)     | 0 (0)                  | 1 (0.1)     | 0(0)                     | 0(0)                | 1 (0.1) |
| lung                               | 145 | 0 (0)                        | 37 (0.3) | 49 (0.3) | 0 (0) | 2 (0)       | 0 (0)                  | 6 (0)       | 56(0.4)                  | 2(0)                | 1 (0)   |
| oesophagus                         | 21  | 0 (0)                        | 3 (0.1)  | 6 (0.3)  | 0 (0) | 0 (0)       | 0 (0)                  | 0 (0)       | 1(0)                     | 0(0)                | 0 (0)   |
| ovary                              | 22  | 0 (0)                        | 1 (0)    | 6 (0.3)  | 0 (0) | 0 (0)       | 0 (0)                  | 0 (0)       | 0(0)                     | 0(0)                | 0 (0)   |
| pancreas                           | 17  | 0 (0)                        | 0 (0)    | 4 (0.2)  | 0 (0) | 0 (0)       | 0 (0)                  | 0 (0)       | 0(0)                     | 0(0)                | 0 (0)   |
| placenta                           | 2   | 0 (0)                        | 0 (0)    | 1 (0.5)  | 0 (0) | 0 (0)       | 0 (0)                  | 0 (0)       | 0(0)                     | 0(0)                | 0 (0)   |
| pleura                             | 5   | 0 (0)                        | 2 (0.4)  | 0 (0)    | 0 (0) | 0 (0)       | 0 (0)                  | 0 (0)       | 0(0)                     | 0(0)                | 0 (0)   |
| prostate                           | 5   | 0 (0)                        | 0 (0)    | 0 (0)    | 0 (0) | 0 (0)       | 0 (0)                  | 0 (0)       | 1(0.2)                   | 1(0.2)              | 0 (0)   |
| skin                               | 51  | 0 (0)                        | 2 (0)    | 1 (0)    | 0 (0) | 0 (0)       | 0 (0)                  | 0 (0)       | 0(0)                     | 1(0)                | 0 (0)   |
| small_intestine                    | 1   | 0 (0)                        | 0 (0)    | 0 (0)    | 0 (0) | 0 (0)       | 0 (0)                  | 0 (0)       | 0(0)                     | 0(0)                | 0 (0)   |
| soft_tissue                        | 19  | 0 (0)                        | 2 (0.1)  | 4 (0.2)  | 0 (0) | 0 (0)       | 0 (0)                  | 1 (0.1)     | 1(0.1)                   | 0(0)                | 0 (0)   |
| stomach                            | 21  | 0 (0)                        | 1 (0)    | 3 (0.1)  | 0 (0) | 0 (0)       | 0 (0)                  | 0 (0)       | 1(0)                     | 0(0)                | 1 (0)   |
| testis                             | 3   | 0 (0)                        | 0 (0)    | 2 (0.7)  | 0 (0) | 0 (0)       | 0 (0)                  | 0 (0)       | 0(0)                     | 0(0)                | 0 (0)   |
| thyroid                            | 11  | 0 (0)                        | 1 (0.1)  | 5 (0.5)  | 0 (0) | 0 (0)       | 0 (0)                  | 0 (0)       | 0(0)                     | 0(0)                | 0 (0)   |
| not specified                      | 1   | 0 (0)                        | 0 (0)    | 0 (0)    | 0 (0) | 0 (0)       | 0 (0)                  | 0 (0)       | 0(0)                     | 0(0)                | 0 (0)   |
| upper_aerodigestive_tract          | 20  | 0 (0)                        | 3 (0.2)  | 4 (0.2)  | 0 (0) | 0 (0)       | 0 (0)                  | 0 (0)       | 0(0)                     | 0(0)                | 0 (0)   |
| urinary_tract                      | 16  | 0 (0)                        | 6 (0.4)  | 1 (0.1)  | 0 (0) | 1 (0.1)     | 0 (0)                  | 1 (0.1)     | 5(0.3)                   | 1(0.1)              | 1 (0.1) |
| vulva                              | 3   | 0 (0)                        | 0 (0)    | 0 (0)    | 0 (0) | 0 (0)       | 0 (0)                  | 0 (0)       | 0(0)                     | 0(0)                | 0 (0)   |

RUNX1 (KCG)

| Cancer Cell lines                  |     | Somatic hemizygous deletions |         |          |       | Somatic HDs | Somatic Amplifications | Breakpoints | Known Cancer Gene Screen |                     |       |
|------------------------------------|-----|------------------------------|---------|----------|-------|-------------|------------------------|-------------|--------------------------|---------------------|-------|
| Tissue                             | №   | <1Mb                         | >1Mb    | Arm      | Chr   |             |                        |             | Point Mutations LOM      | Point Mutations TOV | HDs   |
| adrenal_gland                      | 2   | 0 (0)                        | 0 (0)   | 1 (0.5)  | 0 (0) | 0 (0)       | 0 (0)                  | 0 (0)       | 0 (0)                    | 0 (0)               | 0 (0) |
| autonomic_ganglia                  | 36  | 0 (0)                        | 1 (0)   | 0 (0)    | 0 (0) | 0 (0)       | 0 (0)                  | 0 (0)       | 0 (0)                    | 0 (0)               | 0 (0) |
| biliary_tract                      | 6   | 0 (0)                        | 0 (0)   | 3 (0.5)  | 0 (0) | 0 (0)       | 0 (0)                  | 0 (0)       | 0 (0)                    | 0 (0)               | 0 (0) |
| bone                               | 32  | 0 (0)                        | 0 (0)   | 1 (0)    | 0 (0) | 0 (0)       | 0 (0)                  | 0 (0)       | 0 (0)                    | 0 (0)               | 0 (0) |
| breast                             | 42  | 1 (0)                        | 1 (0)   | 4 (0.1)  | 0 (0) | 2 (0)       | 0 (0)                  | 4 (0.1)     | 0 (0)                    | 0 (0)               | 0 (0) |
| central_nervous_system             | 55  | 0 (0)                        | 1 (0)   | 5 (0.1)  | 0 (0) | 0 (0)       | 0 (0)                  | 0 (0)       | 0 (0)                    | 0 (0)               | 0 (0) |
| cervix                             | 11  | 0 (0)                        | 1 (0.1) | 3 (0.3)  | 0 (0) | 0 (0)       | 0 (0)                  | 0 (0)       | 0 (0)                    | 0 (0)               | 0 (0) |
| endometrium                        | 9   | 0 (0)                        | 2 (0.2) | 0 (0)    | 0 (0) | 0 (0)       | 0 (0)                  | 1 (0.1)     | 0 (0)                    | 0 (0)               | 0 (0) |
| eye                                | 1   | 0 (0)                        | 0 (0)   | 0 (0)    | 0 (0) | 0 (0)       | 0 (0)                  | 0 (0)       | 0 (0)                    | 0 (0)               | 0 (0) |
| gastrointestinal_tract             | 1   | 0 (0)                        | 0 (0)   | 1 (1)    | 0 (0) | 0 (0)       | 0 (0)                  | 1 (1)       | 0 (0)                    | 0 (0)               | 0 (0) |
| haematopoietic_and_lymphoid_tissue | 124 | 0 (0)                        | 0 (0)   | 1 (0)    | 0 (0) | 0 (0)       | 0 (0)                  | 2 (0)       | 1 (0)                    | 0 (0)               | 0 (0) |
| kidney                             | 20  | 0 (0)                        | 0 (0)   | 5 (0.3)  | 0 (0) | 0 (0)       | 0 (0)                  | 0 (0)       | 0 (0)                    | 0 (0)               | 0 (0) |
| large_intestine                    | 36  | 0 (0)                        | 0 (0)   | 5 (0.1)  | 0 (0) | 0 (0)       | 0 (0)                  | 0 (0)       | 0 (0)                    | 0 (0)               | 0 (0) |
| liver                              | 8   | 0 (0)                        | 1 (0.1) | 1 (0.1)  | 0 (0) | 0 (0)       | 0 (0)                  | 0 (0)       | 0 (0)                    | 0 (0)               | 0 (0) |
| lung                               | 145 | 0 (0)                        | 8 (0.1) | 34 (0.2) | 0 (0) | 0 (0)       | 0 (0)                  | 2 (0)       | 1 (0)                    | 0 (0)               | 0 (0) |
| oesophagus                         | 21  | 0 (0)                        | 4 (0.2) | 10 (0.5) | 0 (0) | 0 (0)       | 0 (0)                  | 0 (0)       | 0 (0)                    | 0 (0)               | 0 (0) |
| ovary                              | 22  | 0 (0)                        | 2 (0.1) | 3 (0.1)  | 0 (0) | 0 (0)       | 0 (0)                  | 0 (0)       | 0 (0)                    | 0 (0)               | 0 (0) |
| pancreas                           | 17  | 0 (0)                        | 1 (0.1) | 2 (0.1)  | 0 (0) | 0 (0)       | 0 (0)                  | 0 (0)       | 0 (0)                    | 0 (0)               | 0 (0) |
| placenta                           | 2   | 0 (0)                        | 0 (0)   | 0 (0)    | 0 (0) | 0 (0)       | 0 (0)                  | 0 (0)       | 0 (0)                    | 0 (0)               | 0 (0) |
| pleura                             | 5   | 0 (0)                        | 0 (0)   | 2 (0.4)  | 0 (0) | 0 (0)       | 0 (0)                  | 0 (0)       | 0 (0)                    | 0 (0)               | 0 (0) |
| prostate                           | 5   | 0 (0)                        | 0 (0)   | 0 (0)    | 0 (0) | 0 (0)       | 0 (0)                  | 0 (0)       | 0 (0)                    | 0 (0)               | 0 (0) |
| skin                               | 51  | 0 (0)                        | 1 (0)   | 4 (0.1)  | 0 (0) | 0 (0)       | 0 (0)                  | 0 (0)       | 0 (0)                    | 0 (0)               | 0 (0) |
| small_intestine                    | 1   | 0 (0)                        | 0 (0)   | 0 (0)    | 0 (0) | 0 (0)       | 0 (0)                  | 0 (0)       | 0 (0)                    | 0 (0)               | 0 (0) |
| soft_tissue                        | 19  | 0 (0)                        | 0 (0)   | 2 (0.1)  | 0 (0) | 0 (0)       | 0 (0)                  | 0 (0)       | 0 (0)                    | 0 (0)               | 0 (0) |
| stomach                            | 21  | 0 (0)                        | 1 (0)   | 3 (0.1)  | 0 (0) | 0 (0)       | 0 (0)                  | 1 (0)       | 0 (0)                    | 0 (0)               | 0 (0) |
| testis                             | 3   | 0 (0)                        | 0 (0)   | 1 (0.3)  | 0 (0) | 0 (0)       | 0 (0)                  | 0 (0)       | 0 (0)                    | 0 (0)               | 0 (0) |
| thyroid                            | 11  | 0 (0)                        | 0 (0)   | 3 (0.3)  | 0 (0) | 0 (0)       | 0 (0)                  | 0 (0)       | 0 (0)                    | 0 (0)               | 0 (0) |
| not specified                      | 1   | 0 (0)                        | 0 (0)   | 0 (0)    | 0 (0) | 0 (0)       | 0 (0)                  | 0 (0)       | 0 (0)                    | 0 (0)               | 0 (0) |
| upper_aerodigestive_tract          | 20  | 1 (0.1)                      | 3 (0.2) | 2 (0.1)  | 0 (0) | 0 (0)       | 0 (0)                  | 1 (0.1)     | 0 (0)                    | 0 (0)               | 0 (0) |
| urinary_tract                      | 16  | 0 (0)                        | 3 (0.2) | 3 (0.2)  | 0 (0) | 0 (0)       | 0 (0)                  | 1 (0.1)     | 0 (0)                    | 0 (0)               | 0 (0) |
| vulva                              | 3   | 0 (0)                        | 0 (0)   | 0 (0)    | 0 (0) | 0 (0)       | 0 (0)                  | 0 (0)       | 0 (0)                    | 0 (0)               | 0 (0) |

SMAD4 (KCG)

| Cancer Cell lines                  |     | Somatic hemizygous deletions |          |         |          | Somatic HDs | Somatic Amplifications | Breakpoints | Known Cancer Gene Screen |                     |         |
|------------------------------------|-----|------------------------------|----------|---------|----------|-------------|------------------------|-------------|--------------------------|---------------------|---------|
| Tissue                             | №   | <1Mb                         | >1Mb     | Arm     | Chr      |             |                        |             | Point Mutations LOM      | Point Mutations TOV | HDs     |
| adrenal_gland                      | 2   | 0 (0)                        | 0 (0)    | 0 (0)   | 0 (0)    | 0 (0)       | 0 (0)                  | 0 (0)       | 0 (0)                    | 0 (0)               | 0 (0)   |
| autonomic_ganglia                  | 36  | 0 (0)                        | 1 (0)    | 0 (0)   | 4 (0.1)  | 0 (0)       | 0 (0)                  | 0 (0)       | 0 (0)                    | 0 (0)               | 0 (0)   |
| biliary_tract                      | 6   | 0 (0)                        | 0 (0)    | 0 (0)   | 1 (0.2)  | 0 (0)       | 0 (0)                  | 0 (0)       | 0 (0)                    | 0 (0)               | 0 (0)   |
| bone                               | 32  | 0 (0)                        | 3 (0.1)  | 0 (0)   | 3 (0.1)  | 0 (0)       | 0 (0)                  | 0 (0)       | 0 (0)                    | 0 (0)               | 0 (0)   |
| breast                             | 42  | 0 (0)                        | 6 (0.1)  | 1 (0)   | 4 (0.1)  | 1 (0)       | 0 (0)                  | 1 (0)       | 0 (0)                    | 0 (0)               | 1 (0)   |
| central_nervous_system             | 55  | 0 (0)                        | 5 (0.1)  | 1 (0)   | 5 (0.1)  | 0 (0)       | 0 (0)                  | 0 (0)       | 0 (0)                    | 0 (0)               | 1 (0)   |
| cervix                             | 11  | 0 (0)                        | 1 (0.1)  | 1 (0.1) | 1 (0.1)  | 0 (0)       | 0 (0)                  | 0 (0)       | 0 (0)                    | 0 (0)               | 0 (0)   |
| endometrium                        | 9   | 0 (0)                        | 0 (0)    | 0 (0)   | 0 (0)    | 0 (0)       | 0 (0)                  | 0 (0)       | 0 (0)                    | 0 (0)               | 0 (0)   |
| eye                                | 1   | 0 (0)                        | 0 (0)    | 0 (0)   | 0 (0)    | 0 (0)       | 0 (0)                  | 0 (0)       | 0 (0)                    | 0 (0)               | 0 (0)   |
| gastrointestinal_tract             | 1   | 0 (0)                        | 0 (0)    | 0 (0)   | 1 (1)    | 0 (0)       | 0 (0)                  | 0 (0)       | 0 (0)                    | 0 (0)               | 0 (0)   |
| haematopoietic_and_lymphoid_tissue | 124 | 0 (0)                        | 5 (0)    | 0 (0)   | 0 (0)    | 0 (0)       | 0 (0)                  | 0 (0)       | 0 (0)                    | 1 (0)               | 0 (0)   |
| kidney                             | 20  | 0 (0)                        | 0 (0)    | 1 (0.1) | 3 (0.2)  | 0 (0)       | 0 (0)                  | 0 (0)       | 0 (0)                    | 0 (0)               | 0 (0)   |
| large_intestine                    | 36  | 0 (0)                        | 7 (0.2)  | 0 (0)   | 9 (0.3)  | 3 (0.1)     | 0 (0)                  | 3 (0.1)     | 3 (0.1)                  | 0 (0)               | 2 (0.1) |
| liver                              | 8   | 0 (0)                        | 1 (0.1)  | 0 (0)   | 0 (0)    | 0 (0)       | 0 (0)                  | 0 (0)       | 0 (0)                    | 0 (0)               | 0 (0)   |
| lung                               | 145 | 1 (0)                        | 19 (0.1) | 1 (0)   | 15 (0.1) | 2 (0)       | 0 (0)                  | 0 (0)       | 1 (0)                    | 1 (0)               | 3 (0)   |
| oesophagus                         | 21  | 0 (0)                        | 9 (0.4)  | 1 (0)   | 1 (0)    | 0 (0)       | 0 (0)                  | 0 (0)       | 2 (0.1)                  | 0 (0)               | 0 (0)   |
| ovary                              | 22  | 1 (0)                        | 7 (0.3)  | 0 (0)   | 3 (0.1)  | 0 (0)       | 0 (0)                  | 0 (0)       | 0 (0)                    | 2 (0.1)             | 0 (0)   |
| pancreas                           | 17  | 0 (0)                        | 3 (0.2)  | 1 (0.1) | 3 (0.2)  | 5 (0.3)     | 0 (0)                  | 3 (0.2)     | 3 (0.2)                  | 0 (0)               | 5 (0.3) |
| placenta                           | 2   | 0 (0)                        | 0 (0)    | 0 (0)   | 0 (0)    | 0 (0)       | 0 (0)                  | 0 (0)       | 0 (0)                    | 0 (0)               | 0 (0)   |
| pleura                             | 5   | 0 (0)                        | 0 (0)    | 1 (0.2) | 1 (0.2)  | 0 (0)       | 0 (0)                  | 0 (0)       | 0 (0)                    | 0 (0)               | 0 (0)   |
| prostate                           | 5   | 0 (0)                        | 1 (0.2)  | 0 (0)   | 0 (0)    | 0 (0)       | 0 (0)                  | 0 (0)       | 0 (0)                    | 0 (0)               | 0 (0)   |
| skin                               | 51  | 0 (0)                        | 4 (0.1)  | 3 (0.1) | 4 (0.1)  | 0 (0)       | 0 (0)                  | 0 (0)       | 1 (0)                    | 0 (0)               | 0 (0)   |
| small_intestine                    | 1   | 0 (0)                        | 0 (0)    | 0 (0)   | 0 (0)    | 0 (0)       | 0 (0)                  | 0 (0)       | 0 (0)                    | 0 (0)               | 0 (0)   |
| soft_tissue                        | 19  | 1 (0.1)                      | 1 (0.1)  | 0 (0)   | 1 (0.1)  | 0 (0)       | 0 (0)                  | 1 (0.1)     | 0 (0)                    | 0 (0)               | 0 (0)   |
| stomach                            | 21  | 0 (0)                        | 1 (0)    | 1 (0)   | 3 (0.1)  | 2 (0.1)     | 0 (0)                  | 1 (0)       | 0 (0)                    | 0 (0)               | 2 (0.1) |
| testis                             | 3   | 0 (0)                        | 0 (0)    | 0 (0)   | 0 (0)    | 0 (0)       | 0 (0)                  | 0 (0)       | 0 (0)                    | 0 (0)               | 0 (0)   |
| thyroid                            | 11  | 0 (0)                        | 1 (0.1)  | 0 (0)   | 2 (0.2)  | 0 (0)       | 0 (0)                  | 0 (0)       | 0 (0)                    | 0 (0)               | 0 (0)   |
| not specified                      | 1   | 0 (0)                        | 0 (0)    | 0 (0)   | 0 (0)    | 1 (1)       | 0 (0)                  | 1 (1)       | 0 (0)                    | 0 (0)               | 1 (1)   |
| upper_aerodigestive_tract          | 20  | 0 (0)                        | 11 (0.6) | 2 (0.1) | 0 (0)    | 1 (0.1)     | 0 (0)                  | 0 (0)       | 3 (0.2)                  | 0 (0)               | 1 (0.1) |
| urinary_tract                      | 16  | 0 (0)                        | 4 (0.3)  | 2 (0.1) | 0 (0)    | 0 (0)       | 0 (0)                  | 0 (0)       | 0 (0)                    | 0 (0)               | 0 (0)   |
| vulva                              | 3   | 0 (0)                        | 1 (0.3)  | 0 (0)   | 0 (0)    | 1 (0.3)     | 0 (0)                  | 0 (0)       | 1 (0.3)                  | 0 (0)               | 0 (0)   |

SMO (KCG)

| Cancer Cell lines                  |     | Somatic hemizygous deletions |         |         |         | Somatic HDs | Somatic Amplifications | Breakpoints | Known Cancer Gene Screen |                     |       |
|------------------------------------|-----|------------------------------|---------|---------|---------|-------------|------------------------|-------------|--------------------------|---------------------|-------|
| Tissue                             | №   | <1Mb                         | >1Mb    | Arm     | Chr     |             |                        |             | Point Mutations LOM      | Point Mutations TOV | HDs   |
| adrenal_gland                      | 2   | 0 (0)                        | 0 (0)   | 0 (0)   | 0 (0)   | 0 (0)       | 0 (0)                  | 0 (0)       | 0 (0)                    | 0 (0)               | 0 (0) |
| autonomic_ganglia                  | 36  | 0 (0)                        | 2 (0.1) | 0 (0)   | 0 (0)   | 0 (0)       | 0 (0)                  | 0 (0)       | 0 (0)                    | 0 (0)               | 0 (0) |
| biliary_tract                      | 6   | 0 (0)                        | 0 (0)   | 0 (0)   | 0 (0)   | 0 (0)       | 0 (0)                  | 0 (0)       | 0 (0)                    | 0 (0)               | 0 (0) |
| bone                               | 32  | 0 (0)                        | 2 (0.1) | 0 (0)   | 0 (0)   | 0 (0)       | 0 (0)                  | 0 (0)       | 0 (0)                    | 0 (0)               | 0 (0) |
| breast                             | 42  | 1 (0)                        | 7 (0.2) | 0 (0)   | 0 (0)   | 0 (0)       | 0 (0)                  | 0 (0)       | 0 (0)                    | 0 (0)               | 0 (0) |
| central_nervous_system             | 55  | 0 (0)                        | 4 (0.1) | 0 (0)   | 3 (0.1) | 0 (0)       | 0 (0)                  | 0 (0)       | 0 (0)                    | 0 (0)               | 0 (0) |
| cervix                             | 11  | 0 (0)                        | 1 (0.1) | 1 (0.1) | 0 (0)   | 0 (0)       | 0 (0)                  | 0 (0)       | 0 (0)                    | 0 (0)               | 0 (0) |
| endometrium                        | 9   | 0 (0)                        | 2 (0.2) | 0 (0)   | 0 (0)   | 0 (0)       | 0 (0)                  | 0 (0)       | 0 (0)                    | 0 (0)               | 0 (0) |
| eye                                | 1   | 0 (0)                        | 0 (0)   | 0 (0)   | 0 (0)   | 0 (0)       | 0 (0)                  | 0 (0)       | 0 (0)                    | 0 (0)               | 0 (0) |
| gastrointestinal_tract             | 1   | 0 (0)                        | 0 (0)   | 0 (0)   | 0 (0)   | 0 (0)       | 0 (0)                  | 0 (0)       | 0 (0)                    | 0 (0)               | 0 (0) |
| haematopoietic_and_lymphoid_tissue | 124 | 0 (0)                        | 8 (0.1) | 0 (0)   | 1 (0)   | 0 (0)       | 0 (0)                  | 0 (0)       | 0 (0)                    | 0 (0)               | 0 (0) |
| kidney                             | 20  | 0 (0)                        | 0 (0)   | 0 (0)   | 0 (0)   | 0 (0)       | 0 (0)                  | 0 (0)       | 0 (0)                    | 0 (0)               | 0 (0) |
| large_intestine                    | 36  | 0 (0)                        | 0 (0)   | 0 (0)   | 0 (0)   | 0 (0)       | 0 (0)                  | 0 (0)       | 0 (0)                    | 0 (0)               | 0 (0) |
| liver                              | 8   | 0 (0)                        | 0 (0)   | 0 (0)   | 0 (0)   | 0 (0)       | 0 (0)                  | 0 (0)       | 0 (0)                    | 0 (0)               | 0 (0) |
| lung                               | 145 | 0 (0)                        | 8 (0.1) | 0 (0)   | 4 (0)   | 0 (0)       | 0 (0)                  | 0 (0)       | 0 (0)                    | 0 (0)               | 0 (0) |
| oesophagus                         | 21  | 0 (0)                        | 2 (0.1) | 1 (0)   | 1 (0)   | 0 (0)       | 0 (0)                  | 0 (0)       | 0 (0)                    | 0 (0)               | 0 (0) |
| ovary                              | 22  | 0 (0)                        | 0 (0)   | 0 (0)   | 0 (0)   | 0 (0)       | 0 (0)                  | 0 (0)       | 0 (0)                    | 0 (0)               | 0 (0) |
| pancreas                           | 17  | 0 (0)                        | 1 (0.1) | 0 (0)   | 0 (0)   | 0 (0)       | 0 (0)                  | 0 (0)       | 0 (0)                    | 0 (0)               | 0 (0) |
| placenta                           | 2   | 0 (0)                        | 0 (0)   | 0 (0)   | 0 (0)   | 0 (0)       | 0 (0)                  | 0 (0)       | 0 (0)                    | 0 (0)               | 0 (0) |
| pleura                             | 5   | 0 (0)                        | 0 (0)   | 0 (0)   | 1 (0.2) | 0 (0)       | 0 (0)                  | 0 (0)       | 0 (0)                    | 0 (0)               | 0 (0) |
| prostate                           | 5   | 0 (0)                        | 1 (0.2) | 0 (0)   | 0 (0)   | 0 (0)       | 0 (0)                  | 0 (0)       | 0 (0)                    | 0 (0)               | 0 (0) |
| skin                               | 51  | 0 (0)                        | 3 (0.1) | 0 (0)   | 0 (0)   | 0 (0)       | 0 (0)                  | 0 (0)       | 0 (0)                    | 0 (0)               | 0 (0) |
| small_intestine                    | 1   | 0 (0)                        | 0 (0)   | 0 (0)   | 0 (0)   | 0 (0)       | 0 (0)                  | 0 (0)       | 0 (0)                    | 0 (0)               | 0 (0) |
| soft_tissue                        | 19  | 0 (0)                        | 1 (0.1) | 0 (0)   | 1 (0.1) | 0 (0)       | 0 (0)                  | 0 (0)       | 0 (0)                    | 0 (0)               | 0 (0) |
| stomach                            | 21  | 0 (0)                        | 3 (0.1) | 0 (0)   | 0 (0)   | 0 (0)       | 0 (0)                  | 0 (0)       | 0 (0)                    | 0 (0)               | 0 (0) |
| testis                             | 3   | 0 (0)                        | 0 (0)   | 0 (0)   | 0 (0)   | 0 (0)       | 0 (0)                  | 0 (0)       | 0 (0)                    | 0 (0)               | 0 (0) |
| thyroid                            | 11  | 0 (0)                        | 1 (0.1) | 0 (0)   | 0 (0)   | 0 (0)       | 0 (0)                  | 0 (0)       | 0 (0)                    | 0 (0)               | 0 (0) |
| not specified                      | 1   | 0 (0)                        | 0 (0)   | 0 (0)   | 0 (0)   | 0 (0)       | 0 (0)                  | 0 (0)       | 0 (0)                    | 0 (0)               | 0 (0) |
| upper_aerodigestive_tract          | 20  | 0 (0)                        | 1 (0.1) | 1 (0.1) | 0 (0)   | 0 (0)       | 0 (0)                  | 0 (0)       | 0 (0)                    | 0 (0)               | 0 (0) |
| urinary_tract                      | 16  | 0 (0)                        | 0 (0)   | 0 (0)   | 0 (0)   | 0 (0)       | 0 (0)                  | 0 (0)       | 0 (0)                    | 0 (0)               | 0 (0) |
| vulva                              | 3   | 0 (0)                        | 0 (0)   | 0 (0)   | 0 (0)   | 0 (0)       | 0 (0)                  | 0 (0)       | 0 (0)                    | 0 (0)               | 0 (0) |

**SOCS1 (KCG)**

| Cancer Cell lines                  |     | Somatic hemizygous deletions |          |         |          | Somatic HDs | Somatic Amplifications | Breakpoints | Known Cancer Gene Screen |                     |       |
|------------------------------------|-----|------------------------------|----------|---------|----------|-------------|------------------------|-------------|--------------------------|---------------------|-------|
| Tissue                             | Nº  | <1Mb                         | >1Mb     | Arm     | Chr      |             |                        |             | Point Mutations LOM      | Point Mutations TOV | HDs   |
| adrenal_gland                      | 2   | 0 (0)                        | 0 (0)    | 0 (0)   | 0 (0)    | 0 (0)       | 0 (0)                  | 0 (0)       | 0 (0)                    | 0 (0)               | 0 (0) |
| autonomic_ganglia                  | 36  | 0 (0)                        | 0 (0)    | 0 (0)   | 0 (0)    | 0 (0)       | 0 (0)                  | 0 (0)       | 0 (0)                    | 0 (0)               | 0 (0) |
| biliary_tract                      | 6   | 0 (0)                        | 4 (0.7)  | 0 (0)   | 0 (0)    | 0 (0)       | 0 (0)                  | 0 (0)       | 0 (0)                    | 0 (0)               | 0 (0) |
| bone                               | 32  | 0 (0)                        | 2 (0.1)  | 0 (0)   | 1 (0)    | 0 (0)       | 0 (0)                  | 0 (0)       | 0 (0)                    | 0 (0)               | 0 (0) |
| breast                             | 42  | 0 (0)                        | 4 (0.1)  | 2 (0)   | 1 (0)    | 0 (0)       | 0 (0)                  | 0 (0)       | 0 (0)                    | 0 (0)               | 0 (0) |
| central_nervous_system             | 55  | 0 (0)                        | 3 (0.1)  | 0 (0)   | 0 (0)    | 0 (0)       | 0 (0)                  | 0 (0)       | 0 (0)                    | 0 (0)               | 0 (0) |
| cervix                             | 11  | 1 (0.1)                      | 0 (0)    | 1 (0.1) | 0 (0)    | 0 (0)       | 0 (0)                  | 0 (0)       | 0 (0)                    | 0 (0)               | 0 (0) |
| endometrium                        | 9   | 0 (0)                        | 1 (0.1)  | 0 (0)   | 0 (0)    | 0 (0)       | 0 (0)                  | 0 (0)       | 0 (0)                    | 0 (0)               | 0 (0) |
| eye                                | 1   | 0 (0)                        | 0 (0)    | 0 (0)   | 0 (0)    | 0 (0)       | 0 (0)                  | 0 (0)       | 0 (0)                    | 0 (0)               | 0 (0) |
| gastrointestinal_tract             | 1   | 0 (0)                        | 0 (0)    | 0 (0)   | 0 (0)    | 0 (0)       | 0 (0)                  | 0 (0)       | 0 (0)                    | 0 (0)               | 0 (0) |
| haematopoietic_and_lymphoid_tissue | 124 | 1 (0)                        | 5 (0)    | 0 (0)   | 2 (0)    | 1 (0)       | 0 (0)                  | 0 (0)       | 0 (0)                    | 1 (0)               | 1 (0) |
| kidney                             | 20  | 0 (0)                        | 0 (0)    | 0 (0)   | 3 (0.2)  | 0 (0)       | 0 (0)                  | 0 (0)       | 0 (0)                    | 0 (0)               | 0 (0) |
| large_intestine                    | 36  | 0 (0)                        | 0 (0)    | 0 (0)   | 0 (0)    | 0 (0)       | 0 (0)                  | 0 (0)       | 0 (0)                    | 0 (0)               | 0 (0) |
| liver                              | 8   | 0 (0)                        | 2 (0.3)  | 0 (0)   | 2 (0.3)  | 0 (0)       | 0 (0)                  | 0 (0)       | 0 (0)                    | 0 (0)               | 0 (0) |
| lung                               | 145 | 0 (0)                        | 14 (0.1) | 5 (0)   | 11 (0.1) | 0 (0)       | 0 (0)                  | 0 (0)       | 0 (0)                    | 0 (0)               | 0 (0) |
| oesophagus                         | 21  | 0 (0)                        | 3 (0.1)  | 0 (0)   | 2 (0.1)  | 0 (0)       | 0 (0)                  | 0 (0)       | 0 (0)                    | 0 (0)               | 0 (0) |
| ovary                              | 22  | 0 (0)                        | 3 (0.1)  | 1 (0)   | 2 (0.1)  | 0 (0)       | 0 (0)                  | 0 (0)       | 0 (0)                    | 0 (0)               | 0 (0) |
| pancreas                           | 17  | 0 (0)                        | 4 (0.2)  | 0 (0)   | 1 (0.1)  | 0 (0)       | 0 (0)                  | 0 (0)       | 0 (0)                    | 0 (0)               | 0 (0) |
| placenta                           | 2   | 0 (0)                        | 0 (0)    | 0 (0)   | 0 (0)    | 0 (0)       | 0 (0)                  | 0 (0)       | 0 (0)                    | 0 (0)               | 0 (0) |
| pleura                             | 5   | 0 (0)                        | 0 (0)    | 0 (0)   | 0 (0)    | 0 (0)       | 0 (0)                  | 0 (0)       | 0 (0)                    | 0 (0)               | 0 (0) |
| prostate                           | 5   | 0 (0)                        | 1 (0.2)  | 0 (0)   | 1 (0.2)  | 0 (0)       | 0 (0)                  | 0 (0)       | 0 (0)                    | 0 (0)               | 0 (0) |
| skin                               | 51  | 0 (0)                        | 3 (0.1)  | 1 (0)   | 0 (0)    | 0 (0)       | 0 (0)                  | 0 (0)       | 0 (0)                    | 0 (0)               | 0 (0) |
| small_intestine                    | 1   | 0 (0)                        | 0 (0)    | 0 (0)   | 0 (0)    | 0 (0)       | 0 (0)                  | 0 (0)       | 0 (0)                    | 0 (0)               | 0 (0) |
| soft_tissue                        | 19  | 0 (0)                        | 1 (0.1)  | 0 (0)   | 0 (0)    | 0 (0)       | 0 (0)                  | 0 (0)       | 0 (0)                    | 0 (0)               | 0 (0) |
| stomach                            | 21  | 0 (0)                        | 4 (0.2)  | 0 (0)   | 1 (0)    | 0 (0)       | 0 (0)                  | 0 (0)       | 0 (0)                    | 0 (0)               | 0 (0) |
| testis                             | 3   | 0 (0)                        | 0 (0)    | 0 (0)   | 1 (0.3)  | 0 (0)       | 0 (0)                  | 0 (0)       | 0 (0)                    | 0 (0)               | 0 (0) |
| thyroid                            | 11  | 0 (0)                        | 3 (0.3)  | 0 (0)   | 1 (0.1)  | 0 (0)       | 0 (0)                  | 0 (0)       | 0 (0)                    | 0 (0)               | 0 (0) |
| not specified                      | 1   | 0 (0)                        | 0 (0)    | 0 (0)   | 0 (0)    | 0 (0)       | 0 (0)                  | 0 (0)       | 0 (0)                    | 0 (0)               | 0 (0) |
| upper_aerodigestive_tract          | 20  | 1 (0.1)                      | 1 (0.1)  | 0 (0)   | 0 (0)    | 0 (0)       | 0 (0)                  | 0 (0)       | 0 (0)                    | 0 (0)               | 0 (0) |
| urinary_tract                      | 16  | 0 (0)                        | 0 (0)    | 0 (0)   | 1 (0.1)  | 0 (0)       | 1 (0.1)                | 0 (0)       | 0 (0)                    | 0 (0)               | 0 (0) |
| vulva                              | 3   | 0 (0)                        | 1 (0.3)  | 0 (0)   | 0 (0)    | 0 (0)       | 0 (0)                  | 0 (0)       | 0 (0)                    | 0 (0)               | 0 (0) |

**STK11 (KCG)**

| Cancer Cell lines                  |     | Somatic hemizygous deletions |          |          |          | Somatic HDs | Somatic Amplifications | Breakpoints | Known Cancer Gene Screen |                     |         |
|------------------------------------|-----|------------------------------|----------|----------|----------|-------------|------------------------|-------------|--------------------------|---------------------|---------|
| Tissue                             | Nº  | <1Mb                         | >1Mb     | Arm      | Chr      |             |                        |             | Point Mutations LOM      | Point Mutations TOV | HDs     |
| adrenal_gland                      | 2   | 0 (0)                        | 1 (0.5)  | 0 (0)    | 0 (0)    | 0 (0)       | 0 (0)                  | 0 (0)       | 0 (0)                    | 0 (0)               | 0 (0)   |
| autonomic_ganglia                  | 36  | 0 (0)                        | 4 (0.1)  | 0 (0)    | 0 (0)    | 0 (0)       | 0 (0)                  | 0 (0)       | 0 (0)                    | 0 (0)               | 0 (0)   |
| biliary_tract                      | 6   | 0 (0)                        | 1 (0.2)  | 0 (0)    | 0 (0)    | 0 (0)       | 0 (0)                  | 0 (0)       | 0 (0)                    | 0 (0)               | 0 (0)   |
| bone                               | 32  | 0 (0)                        | 2 (0.1)  | 1 (0)    | 0 (0)    | 0 (0)       | 0 (0)                  | 0 (0)       | 0 (0)                    | 0 (0)               | 0 (0)   |
| breast                             | 42  | 0 (0)                        | 13 (0.3) | 4 (0.1)  | 1 (0)    | 0 (0)       | 0 (0)                  | 0 (0)       | 0 (0)                    | 0 (0)               | 1 (0)   |
| central_nervous_system             | 55  | 0 (0)                        | 5 (0.1)  | 0 (0)    | 4 (0.1)  | 0 (0)       | 0 (0)                  | 0 (0)       | 0 (0)                    | 0 (0)               | 0 (0)   |
| cervix                             | 11  | 0 (0)                        | 7 (0.6)  | 0 (0)    | 1 (0.1)  | 0 (0)       | 0 (0)                  | 0 (0)       | 1 (0.1)                  | 0 (0)               | 2 (0.2) |
| endometrium                        | 9   | 0 (0)                        | 1 (0.1)  | 0 (0)    | 0 (0)    | 0 (0)       | 0 (0)                  | 0 (0)       | 0 (0)                    | 0 (0)               | 0 (0)   |
| eye                                | 1   | 0 (0)                        | 0 (0)    | 0 (0)    | 0 (0)    | 0 (0)       | 0 (0)                  | 0 (0)       | 0 (0)                    | 0 (0)               | 0 (0)   |
| gastrointestinal_tract             | 1   | 0 (0)                        | 1 (1)    | 0 (0)    | 0 (0)    | 0 (0)       | 0 (0)                  | 0 (0)       | 0 (0)                    | 0 (0)               | 0 (0)   |
| haematopoietic_and_lymphoid_tissue | 124 | 0 (0)                        | 9 (0.1)  | 0 (0)    | 0 (0)    | 0 (0)       | 0 (0)                  | 0 (0)       | 0 (0)                    | 1 (0)               | 0 (0)   |
| kidney                             | 20  | 0 (0)                        | 0 (0)    | 2 (0.1)  | 2 (0.1)  | 0 (0)       | 0 (0)                  | 0 (0)       | 0 (0)                    | 0 (0)               | 1 (0.1) |
| large_intestine                    | 36  | 0 (0)                        | 2 (0.1)  | 0 (0)    | 3 (0.1)  | 0 (0)       | 0 (0)                  | 0 (0)       | 1 (0)                    | 0 (0)               | 0 (0)   |
| liver                              | 8   | 0 (0)                        | 4 (0.5)  | 1 (0.1)  | 2 (0.3)  | 0 (0)       | 0 (0)                  | 0 (0)       | 1 (0.1)                  | 0 (0)               | 0 (0)   |
| lung                               | 145 | 0 (0)                        | 33 (0.2) | 18 (0.1) | 17 (0.1) | 0 (0)       | 0 (0)                  | 0 (0)       | 18 (0.1)                 | 1 (0)               | 5 (0)   |
| oesophagus                         | 21  | 0 (0)                        | 5 (0.2)  | 0 (0)    | 2 (0.1)  | 0 (0)       | 0 (0)                  | 1 (0)       | 0 (0)                    | 0 (0)               | 1 (0)   |
| ovary                              | 22  | 0 (0)                        | 5 (0.2)  | 1 (0)    | 1 (0)    | 0 (0)       | 0 (0)                  | 1 (0)       | 0 (0)                    | 0 (0)               | 1 (0)   |
| pancreas                           | 17  | 0 (0)                        | 5 (0.3)  | 0 (0)    | 1 (0.1)  | 0 (0)       | 0 (0)                  | 1 (0.1)     | 0 (0)                    | 0 (0)               | 0 (0)   |
| placenta                           | 2   | 0 (0)                        | 0 (0)    | 0 (0)    | 0 (0)    | 0 (0)       | 0 (0)                  | 0 (0)       | 0 (0)                    | 0 (0)               | 0 (0)   |
| pleura                             | 5   | 0 (0)                        | 1 (0.2)  | 0 (0)    | 0 (0)    | 0 (0)       | 0 (0)                  | 0 (0)       | 0 (0)                    | 0 (0)               | 0 (0)   |
| prostate                           | 5   | 0 (0)                        | 1 (0.2)  | 0 (0)    | 0 (0)    | 0 (0)       | 0 (0)                  | 1 (0.2)     | 1 (0.2)                  | 0 (0)               | 0 (0)   |
| skin                               | 51  | 2 (0)                        | 4 (0.1)  | 2 (0)    | 2 (0)    | 0 (0)       | 0 (0)                  | 0 (0)       | 1 (0)                    | 0 (0)               | 1 (0)   |
| small_intestine                    | 1   | 0 (0)                        | 1 (1)    | 0 (0)    | 0 (0)    | 0 (0)       | 0 (0)                  | 0 (0)       | 0 (0)                    | 0 (0)               | 0 (0)   |
| soft_tissue                        | 19  | 0 (0)                        | 0 (0)    | 1 (0.1)  | 2 (0.1)  | 0 (0)       | 0 (0)                  | 0 (0)       | 0 (0)                    | 0 (0)               | 0 (0)   |
| stomach                            | 21  | 0 (0)                        | 6 (0.3)  | 2 (0.1)  | 1 (0)    | 0 (0)       | 0 (0)                  | 0 (0)       | 0 (0)                    | 0 (0)               | 0 (0)   |
| testis                             | 3   | 0 (0)                        | 0 (0)    | 0 (0)    | 0 (0)    | 0 (0)       | 0 (0)                  | 0 (0)       | 0 (0)                    | 0 (0)               | 0 (0)   |
| thyroid                            | 11  | 0 (0)                        | 2 (0.2)  | 0 (0)    | 1 (0.1)  | 0 (0)       | 0 (0)                  | 0 (0)       | 0 (0)                    | 0 (0)               | 0 (0)   |
| not specified                      | 1   | 0 (0)                        | 0 (0)    | 0 (0)    | 0 (0)    | 0 (0)       | 0 (0)                  | 0 (0)       | 0 (0)                    | 0 (0)               | 0 (0)   |
| upper_aerodigestive_tract          | 20  | 0 (0)                        | 6 (0.3)  | 0 (0)    | 0 (0)    | 0 (0)       | 0 (0)                  | 0 (0)       | 0 (0)                    | 0 (0)               | 0 (0)   |
| urinary_tract                      | 16  | 0 (0)                        | 0 (0)    | 1 (0.1)  | 0 (0)    | 0 (0)       | 0 (0)                  | 0 (0)       | 0 (0)                    | 0 (0)               | 0 (0)   |
| vulva                              | 3   | 0 (0)                        | 0 (0)    | 1 (0.3)  | 0 (0)    | 0 (0)       | 0 (0)                  | 0 (0)       | 0 (0)                    | 0 (0)               | 0 (0)   |

SUFU (KCG)

| Cancer Cell lines                  |     | Somatic hemizygous deletions |          |         |          | Somatic HDs | Somatic Amplifications | Breakpoints | Known Cancer Gene Screen |                     |       |
|------------------------------------|-----|------------------------------|----------|---------|----------|-------------|------------------------|-------------|--------------------------|---------------------|-------|
| Tissue                             | №   | <1Mb                         | >1Mb     | Arm     | Chr      |             |                        |             | Point Mutations LOM      | Point Mutations TOV | HDs   |
| adrenal_gland                      | 2   | 0 (0)                        | 0 (0)    | 0 (0)   | 0 (0)    | 0 (0)       | 0 (0)                  | 0 (0)       | 0 (0)                    | 0 (0)               | 0 (0) |
| autonomic_ganglia                  | 36  | 0 (0)                        | 3 (0.1)  | 1 (0)   | 0 (0)    | 0 (0)       | 0 (0)                  | 0 (0)       | 0 (0)                    | 0 (0)               | 0 (0) |
| biliary_tract                      | 6   | 0 (0)                        | 1 (0.2)  | 0 (0)   | 2 (0.3)  | 0 (0)       | 0 (0)                  | 1 (0.2)     | 0 (0)                    | 0 (0)               | 0 (0) |
| bone                               | 32  | 0 (0)                        | 2 (0.1)  | 1 (0)   | 4 (0.1)  | 0 (0)       | 0 (0)                  | 0 (0)       | 0 (0)                    | 0 (0)               | 0 (0) |
| breast                             | 42  | 0 (0)                        | 14 (0.3) | 1 (0)   | 3 (0.1)  | 0 (0)       | 1 (0)                  | 1 (0)       | 0 (0)                    | 0 (0)               | 0 (0) |
| central_nervous_system             | 55  | 0 (0)                        | 4 (0.1)  | 1 (0)   | 23 (0.4) | 0 (0)       | 0 (0)                  | 0 (0)       | 0 (0)                    | 0 (0)               | 0 (0) |
| cervix                             | 11  | 0 (0)                        | 0 (0)    | 0 (0)   | 0 (0)    | 0 (0)       | 0 (0)                  | 0 (0)       | 0 (0)                    | 0 (0)               | 0 (0) |
| endometrium                        | 9   | 0 (0)                        | 4 (0.4)  | 0 (0)   | 0 (0)    | 0 (0)       | 0 (0)                  | 0 (0)       | 0 (0)                    | 0 (0)               | 0 (0) |
| eye                                | 1   | 0 (0)                        | 0 (0)    | 0 (0)   | 0 (0)    | 0 (0)       | 0 (0)                  | 0 (0)       | 0 (0)                    | 0 (0)               | 0 (0) |
| gastrointestinal_tract             | 1   | 0 (0)                        | 0 (0)    | 0 (0)   | 1 (1)    | 0 (0)       | 0 (0)                  | 0 (0)       | 0 (0)                    | 0 (0)               | 0 (0) |
| haematopoietic_and_lymphoid_tissue | 124 | 0 (0)                        | 9 (0.1)  | 1 (0)   | 2 (0)    | 0 (0)       | 0 (0)                  | 0 (0)       | 0 (0)                    | 0 (0)               | 0 (0) |
| kidney                             | 20  | 0 (0)                        | 1 (0.1)  | 0 (0)   | 2 (0.1)  | 0 (0)       | 0 (0)                  | 0 (0)       | 0 (0)                    | 0 (0)               | 0 (0) |
| large_intestine                    | 36  | 0 (0)                        | 3 (0.1)  | 0 (0)   | 1 (0)    | 0 (0)       | 0 (0)                  | 0 (0)       | 0 (0)                    | 0 (0)               | 0 (0) |
| liver                              | 8   | 0 (0)                        | 0 (0)    | 1 (0.1) | 0 (0)    | 0 (0)       | 0 (0)                  | 0 (0)       | 0 (0)                    | 0 (0)               | 0 (0) |
| lung                               | 145 | 0 (0)                        | 23 (0.2) | 2 (0)   | 22 (0.2) | 0 (0)       | 0 (0)                  | 0 (0)       | 0 (0)                    | 0 (0)               | 0 (0) |
| oesophagus                         | 21  | 0 (0)                        | 2 (0.1)  | 2 (0.1) | 0 (0)    | 0 (0)       | 0 (0)                  | 0 (0)       | 0 (0)                    | 0 (0)               | 0 (0) |
| ovary                              | 22  | 0 (0)                        | 4 (0.2)  | 1 (0)   | 1 (0)    | 0 (0)       | 0 (0)                  | 1 (0)       | 0 (0)                    | 0 (0)               | 0 (0) |
| pancreas                           | 17  | 0 (0)                        | 3 (0.2)  | 0 (0)   | 1 (0.1)  | 0 (0)       | 0 (0)                  | 0 (0)       | 0 (0)                    | 0 (0)               | 0 (0) |
| placenta                           | 2   | 0 (0)                        | 0 (0)    | 0 (0)   | 0 (0)    | 0 (0)       | 0 (0)                  | 0 (0)       | 0 (0)                    | 0 (0)               | 0 (0) |
| pleura                             | 5   | 0 (0)                        | 0 (0)    | 0 (0)   | 0 (0)    | 0 (0)       | 0 (0)                  | 0 (0)       | 0 (0)                    | 0 (0)               | 0 (0) |
| prostate                           | 5   | 0 (0)                        | 0 (0)    | 0 (0)   | 0 (0)    | 0 (0)       | 0 (0)                  | 0 (0)       | 0 (0)                    | 0 (0)               | 0 (0) |
| skin                               | 51  | 0 (0)                        | 5 (0.1)  | 0 (0)   | 13 (0.3) | 0 (0)       | 0 (0)                  | 0 (0)       | 0 (0)                    | 0 (0)               | 0 (0) |
| small_intestine                    | 1   | 0 (0)                        | 0 (0)    | 0 (0)   | 0 (0)    | 0 (0)       | 0 (0)                  | 0 (0)       | 0 (0)                    | 0 (0)               | 0 (0) |
| soft_tissue                        | 19  | 0 (0)                        | 0 (0)    | 0 (0)   | 0 (0)    | 0 (0)       | 0 (0)                  | 0 (0)       | 0 (0)                    | 0 (0)               | 0 (0) |
| stomach                            | 21  | 0 (0)                        | 1 (0)    | 1 (0)   | 2 (0.1)  | 0 (0)       | 0 (0)                  | 0 (0)       | 0 (0)                    | 0 (0)               | 0 (0) |
| testis                             | 3   | 0 (0)                        | 0 (0)    | 1 (0.3) | 1 (0.3)  | 0 (0)       | 0 (0)                  | 0 (0)       | 0 (0)                    | 0 (0)               | 0 (0) |
| thyroid                            | 11  | 0 (0)                        | 0 (0)    | 0 (0)   | 2 (0.2)  | 0 (0)       | 0 (0)                  | 0 (0)       | 0 (0)                    | 0 (0)               | 0 (0) |
| not specified                      | 1   | 0 (0)                        | 0 (0)    | 0 (0)   | 0 (0)    | 0 (0)       | 0 (0)                  | 0 (0)       | 0 (0)                    | 0 (0)               | 0 (0) |
| upper_aerodigestive_tract          | 20  | 0 (0)                        | 1 (0.1)  | 0 (0)   | 0 (0)    | 0 (0)       | 0 (0)                  | 0 (0)       | 0 (0)                    | 0 (0)               | 0 (0) |
| urinary_tract                      | 16  | 0 (0)                        | 3 (0.2)  | 0 (0)   | 2 (0.1)  | 0 (0)       | 0 (0)                  | 0 (0)       | 0 (0)                    | 0 (0)               | 0 (0) |
| vulva                              | 3   | 0 (0)                        | 0 (0)    | 0 (0)   | 0 (0)    | 0 (0)       | 0 (0)                  | 0 (0)       | 0 (0)                    | 0 (0)               | 0 (0) |

TP53 (KCG)

| Cancer Cell lines                  |     | Somatic hemizygous deletions |          |          |          | Somatic HDs | Somatic Amplifications | Breakpoints | Known Cancer Gene Screen |                     |       |
|------------------------------------|-----|------------------------------|----------|----------|----------|-------------|------------------------|-------------|--------------------------|---------------------|-------|
| Tissue                             | №   | <1Mb                         | >1Mb     | Arm      | Chr      |             |                        |             | Point Mutations LOM      | Point Mutations TOV | HDs   |
| adrenal_gland                      | 2   | 0 (0)                        | 0 (0)    | 0 (0)    | 1 (0.5)  | 0 (0)       | 0 (0)                  | 0 (0)       | 1 (0.5)                  | 0 (0)               | 0 (0) |
| autonomic_ganglia                  | 36  | 0 (0)                        | 12 (0.3) | 3 (0.1)  | 1 (0)    | 0 (0)       | 0 (0)                  | 1 (0)       | 12 (0.3)                 | 0 (0)               | 0 (0) |
| biliary_tract                      | 6   | 0 (0)                        | 2 (0.3)  | 3 (0.5)  | 0 (0)    | 0 (0)       | 0 (0)                  | 0 (0)       | 6 (1)                    | 0 (0)               | 0 (0) |
| bone                               | 32  | 2 (0.1)                      | 10 (0.3) | 1 (0)    | 5 (0.2)  | 1 (0)       | 0 (0)                  | 2 (0.1)     | 19 (0.6)                 | 0 (0)               | 1 (0) |
| breast                             | 42  | 0 (0)                        | 9 (0.2)  | 8 (0.2)  | 8 (0.2)  | 0 (0)       | 0 (0)                  | 1 (0)       | 29 (0.7)                 | 1 (0)               | 0 (0) |
| central_nervous_system             | 55  | 0 (0)                        | 19 (0.3) | 2 (0)    | 9 (0.2)  | 1 (0)       | 0 (0)                  | 1 (0)       | 32 (0.6)                 | 0 (0)               | 1 (0) |
| cervix                             | 11  | 0 (0)                        | 2 (0.2)  | 0 (0)    | 1 (0.1)  | 0 (0)       | 0 (0)                  | 0 (0)       | 2 (0.2)                  | 0 (0)               | 0 (0) |
| endometrium                        | 9   | 0 (0)                        | 0 (0)    | 1 (0.1)  | 0 (0)    | 0 (0)       | 0 (0)                  | 0 (0)       | 8 (0.9)                  | 0 (0)               | 0 (0) |
| eye                                | 1   | 0 (0)                        | 0 (0)    | 0 (0)    | 0 (0)    | 0 (0)       | 0 (0)                  | 0 (0)       | 1 (1)                    | 0 (0)               | 0 (0) |
| gastrointestinal_tract             | 1   | 0 (0)                        | 0 (0)    | 0 (0)    | 0 (0)    | 0 (0)       | 0 (0)                  | 0 (0)       | 1 (1)                    | 0 (0)               | 0 (0) |
| haematopoietic_and_lymphoid_tissue | 124 | 4 (0)                        | 21 (0.2) | 13 (0.1) | 3 (0)    | 2 (0)       | 0 (0)                  | 2 (0)       | 69 (0.6)                 | 2 (0)               | 2 (0) |
| kidney                             | 20  | 0 (0)                        | 1 (0.1)  | 3 (0.2)  | 3 (0.2)  | 0 (0)       | 0 (0)                  | 0 (0)       | 7 (0.4)                  | 0 (0)               | 0 (0) |
| large_intestine                    | 36  | 0 (0)                        | 7 (0.2)  | 8 (0.2)  | 4 (0.1)  | 0 (0)       | 0 (0)                  | 0 (0)       | 22 (0.6)                 | 3 (0.1)             | 0 (0) |
| liver                              | 8   | 0 (0)                        | 3 (0.4)  | 1 (0.1)  | 0 (0)    | 0 (0)       | 0 (0)                  | 0 (0)       | 6 (0.8)                  | 0 (0)               | 0 (0) |
| lung                               | 145 | 1 (0)                        | 32 (0.2) | 54 (0.4) | 15 (0.1) | 0 (0)       | 0 (0)                  | 0 (0)       | 119 (0.8)                | 1 (0)               | 0 (0) |
| oesophagus                         | 21  | 0 (0)                        | 8 (0.4)  | 2 (0.1)  | 4 (0.2)  | 0 (0)       | 0 (0)                  | 0 (0)       | 20 (1)                   | 0 (0)               | 0 (0) |
| ovary                              | 22  | 0 (0)                        | 4 (0.2)  | 1 (0)    | 5 (0.2)  | 0 (0)       | 0 (0)                  | 0 (0)       | 13 (0.6)                 | 0 (0)               | 0 (0) |
| pancreas                           | 17  | 0 (0)                        | 4 (0.2)  | 6 (0.4)  | 1 (0.1)  | 0 (0)       | 0 (0)                  | 0 (0)       | 13 (0.8)                 | 0 (0)               | 0 (0) |
| placenta                           | 2   | 0 (0)                        | 0 (0)    | 0 (0)    | 0 (0)    | 0 (0)       | 0 (0)                  | 0 (0)       | 0 (0)                    | 0 (0)               | 0 (0) |
| pleura                             | 5   | 0 (0)                        | 0 (0)    | 0 (0)    | 1 (0.2)  | 0 (0)       | 0 (0)                  | 0 (0)       | 0 (0)                    | 0 (0)               | 0 (0) |
| prostate                           | 5   | 0 (0)                        | 0 (0)    | 0 (0)    | 0 (0)    | 0 (0)       | 0 (0)                  | 0 (0)       | 3 (0.6)                  | 0 (0)               | 0 (0) |
| skin                               | 51  | 1 (0)                        | 8 (0.2)  | 6 (0.1)  | 3 (0.1)  | 0 (0)       | 0 (0)                  | 0 (0)       | 18 (0.4)                 | 1 (0)               | 0 (0) |
| small_intestine                    | 1   | 0 (0)                        | 0 (0)    | 0 (0)    | 0 (0)    | 0 (0)       | 0 (0)                  | 0 (0)       | 0 (0)                    | 0 (0)               | 0 (0) |
| soft_tissue                        | 19  | 0 (0)                        | 0 (0)    | 3 (0.2)  | 2 (0.1)  | 0 (0)       | 0 (0)                  | 0 (0)       | 9 (0.5)                  | 0 (0)               | 0 (0) |
| stomach                            | 21  | 0 (0)                        | 4 (0.2)  | 4 (0.2)  | 2 (0.1)  | 1 (0)       | 0 (0)                  | 1 (0)       | 13 (0.6)                 | 0 (0)               | 1 (0) |
| testis                             | 3   | 0 (0)                        | 1 (0.3)  | 0 (0)    | 0 (0)    | 0 (0)       | 0 (0)                  | 0 (0)       | 1 (0.3)                  | 0 (0)               | 0 (0) |
| thyroid                            | 11  | 0 (0)                        | 0 (0)    | 3 (0.3)  | 4 (0.4)  | 0 (0)       | 0 (0)                  | 0 (0)       | 9 (0.8)                  | 0 (0)               | 0 (0) |
| not specified                      | 1   | 0 (0)                        | 0 (0)    | 0 (0)    | 0 (0)    | 0 (0)       | 0 (0)                  | 0 (0)       | 1 (1)                    | 0 (0)               | 0 (0) |
| upper_aerodigestive_tract          | 20  | 0 (0)                        | 4 (0.2)  | 5 (0.3)  | 1 (0.1)  | 0 (0)       | 0 (0)                  | 0 (0)       | 17 (0.9)                 | 1 (0.1)             | 0 (0) |
| urinary_tract                      | 16  | 0 (0)                        | 5 (0.3)  | 3 (0.2)  | 0 (0)    | 0 (0)       | 0 (0)                  | 0 (0)       | 12 (0.8)                 | 0 (0)               | 0 (0) |
| vulva                              | 3   | 0 (0)                        | 2 (0.7)  | 0 (0)    | 0 (0)    | 0 (0)       | 0 (0)                  | 0 (0)       | 3 (1)                    | 0 (0)               | 0 (0) |

## VHL (KCG)

| Cancer Cell lines                  |     | Somatic hemizygous deletions |          |          |         | Somatic HDs | Somatic Amplifications | Breakpoints | Known Cancer Gene Screen |                     |       |
|------------------------------------|-----|------------------------------|----------|----------|---------|-------------|------------------------|-------------|--------------------------|---------------------|-------|
| Tissue                             | Ne  | <1Mb                         | >1Mb     | Arm      | Chr     |             |                        |             | Point Mutations LOM      | Point Mutations TOV | HDs   |
| adrenal_gland                      | 2   | 0 (0)                        | 0 (0)    | 0 (0)    | 0 (0)   | 0 (0)       | 0 (0)                  | 0 (0)       | 0 (0)                    | 0 (0)               | 0 (0) |
| autonomic_ganglia                  | 36  | 0 (0)                        | 7 (0.2)  | 3 (0.1)  | 0 (0)   | 0 (0)       | 0 (0)                  | 0 (0)       | 0 (0)                    | 0 (0)               | 0 (0) |
| biliary_tract                      | 6   | 0 (0)                        | 0 (0)    | 1 (0.2)  | 0 (0)   | 0 (0)       | 0 (0)                  | 0 (0)       | 0 (0)                    | 0 (0)               | 0 (0) |
| bone                               | 32  | 0 (0)                        | 7 (0.2)  | 0 (0)    | 1 (0)   | 0 (0)       | 0 (0)                  | 0 (0)       | 0 (0)                    | 0 (0)               | 0 (0) |
| breast                             | 42  | 0 (0)                        | 4 (0.1)  | 0 (0)    | 0 (0)   | 0 (0)       | 0 (0)                  | 0 (0)       | 0 (0)                    | 0 (0)               | 0 (0) |
| central_nervous_system             | 55  | 0 (0)                        | 2 (0)    | 1 (0)    | 1 (0)   | 0 (0)       | 0 (0)                  | 0 (0)       | 0 (0)                    | 0 (0)               | 0 (0) |
| cervix                             | 11  | 0 (0)                        | 0 (0)    | 1 (0.1)  | 1 (0.1) | 0 (0)       | 0 (0)                  | 0 (0)       | 0 (0)                    | 0 (0)               | 0 (0) |
| endometrium                        | 9   | 0 (0)                        | 1 (0.1)  | 0 (0)    | 0 (0)   | 0 (0)       | 0 (0)                  | 0 (0)       | 0 (0)                    | 0 (0)               | 0 (0) |
| eye                                | 1   | 0 (0)                        | 0 (0)    | 0 (0)    | 0 (0)   | 0 (0)       | 0 (0)                  | 0 (0)       | 0 (0)                    | 0 (0)               | 0 (0) |
| gastrointestinal_tract             | 1   | 0 (0)                        | 0 (0)    | 1 (1)    | 0 (0)   | 0 (0)       | 0 (0)                  | 0 (0)       | 0 (0)                    | 0 (0)               | 0 (0) |
| haematopoietic_and_lymphoid_tissue | 124 | 0 (0)                        | 5 (0)    | 0 (0)    | 1 (0)   | 0 (0)       | 0 (0)                  | 0 (0)       | 0 (0)                    | 0 (0)               | 0 (0) |
| kidney                             | 20  | 0 (0)                        | 5 (0.3)  | 1 (0.1)  | 0 (0)   | 0 (0)       | 0 (0)                  | 0 (0)       | 7 (0.4)                  | 1 (0.1)             | 0 (0) |
| large_intestine                    | 36  | 0 (0)                        | 4 (0.1)  | 0 (0)    | 1 (0)   | 0 (0)       | 0 (0)                  | 0 (0)       | 0 (0)                    | 0 (0)               | 0 (0) |
| liver                              | 8   | 0 (0)                        | 1 (0.1)  | 0 (0)    | 0 (0)   | 0 (0)       | 0 (0)                  | 0 (0)       | 0 (0)                    | 0 (0)               | 0 (0) |
| lung                               | 145 | 1 (0)                        | 20 (0.1) | 23 (0.2) | 6 (0)   | 0 (0)       | 0 (0)                  | 1 (0)       | 0 (0)                    | 0 (0)               | 0 (0) |
| oesophagus                         | 21  | 0 (0)                        | 1 (0)    | 4 (0.2)  | 0 (0)   | 0 (0)       | 0 (0)                  | 0 (0)       | 0 (0)                    | 0 (0)               | 0 (0) |
| ovary                              | 22  | 1 (0)                        | 4 (0.2)  | 0 (0)    | 0 (0)   | 0 (0)       | 0 (0)                  | 0 (0)       | 0 (0)                    | 0 (0)               | 0 (0) |
| pancreas                           | 17  | 0 (0)                        | 1 (0.1)  | 1 (0.1)  | 0 (0)   | 0 (0)       | 0 (0)                  | 0 (0)       | 0 (0)                    | 0 (0)               | 0 (0) |
| placenta                           | 2   | 0 (0)                        | 0 (0)    | 0 (0)    | 0 (0)   | 0 (0)       | 0 (0)                  | 0 (0)       | 0 (0)                    | 0 (0)               | 0 (0) |
| pleura                             | 5   | 0 (0)                        | 1 (0.2)  | 0 (0)    | 0 (0)   | 0 (0)       | 0 (0)                  | 0 (0)       | 0 (0)                    | 0 (0)               | 0 (0) |
| prostate                           | 5   | 0 (0)                        | 2 (0.4)  | 0 (0)    | 0 (0)   | 0 (0)       | 0 (0)                  | 0 (0)       | 0 (0)                    | 0 (0)               | 0 (0) |
| skin                               | 51  | 0 (0)                        | 10 (0.2) | 3 (0.1)  | 0 (0)   | 0 (0)       | 0 (0)                  | 0 (0)       | 0 (0)                    | 0 (0)               | 0 (0) |
| small_intestine                    | 1   | 0 (0)                        | 0 (0)    | 0 (0)    | 0 (0)   | 0 (0)       | 0 (0)                  | 0 (0)       | 0 (0)                    | 0 (0)               | 0 (0) |
| soft_tissue                        | 19  | 0 (0)                        | 0 (0)    | 0 (0)    | 0 (0)   | 0 (0)       | 0 (0)                  | 0 (0)       | 0 (0)                    | 0 (0)               | 0 (0) |
| stomach                            | 21  | 0 (0)                        | 1 (0)    | 0 (0)    | 1 (0)   | 0 (0)       | 0 (0)                  | 0 (0)       | 0 (0)                    | 0 (0)               | 0 (0) |
| testis                             | 3   | 0 (0)                        | 2 (0.7)  | 0 (0)    | 0 (0)   | 0 (0)       | 0 (0)                  | 0 (0)       | 0 (0)                    | 0 (0)               | 0 (0) |
| thyroid                            | 11  | 0 (0)                        | 0 (0)    | 0 (0)    | 1 (0.1) | 0 (0)       | 0 (0)                  | 0 (0)       | 0 (0)                    | 0 (0)               | 0 (0) |
| not specified                      | 1   | 0 (0)                        | 0 (0)    | 0 (0)    | 0 (0)   | 0 (0)       | 0 (0)                  | 0 (0)       | 0 (0)                    | 0 (0)               | 0 (0) |
| upper_aerodigestive_tract          | 20  | 0 (0)                        | 0 (0)    | 3 (0.2)  | 0 (0)   | 0 (0)       | 0 (0)                  | 0 (0)       | 0 (0)                    | 0 (0)               | 0 (0) |
| urinary_tract                      | 16  | 0 (0)                        | 0 (0)    | 0 (0)    | 0 (0)   | 0 (0)       | 0 (0)                  | 0 (0)       | 0 (0)                    | 0 (0)               | 0 (0) |
| vulva                              | 3   | 0 (0)                        | 1 (0.3)  | 0 (0)    | 0 (0)   | 0 (0)       | 0 (0)                  | 0 (0)       | 0 (0)                    | 0 (0)               | 0 (0) |

MACROD2 (Unknown)

| Cancer Cell lines                  |     | Somatic hemizygous deletions |          |          |         | Somatic<br>HDs | Somatic<br>Amplifications | Breakpoints | Known Cancer Gene Screen |     |
|------------------------------------|-----|------------------------------|----------|----------|---------|----------------|---------------------------|-------------|--------------------------|-----|
| Tissue                             | No  | <1Mb                         | >1Mb     | Arm      | Chr     |                |                           |             | Point Mutations          | HDs |
| adrenal_gland                      | 2   | 0 (0)                        | 0 (0)    | 0 (0)    | 0 (0)   | 0 (0)          | 0 (0)                     | 1 (0.5)     | 0 (0)                    | ND  |
| autonomic_ganglia                  | 36  | 6 (0.2)                      | 1 (0)    | 1 (0)    | 1 (0)   | 1 (0)          | 0 (0)                     | 8 (0.2)     | 0 (0)                    | ND  |
| biliary_tract                      | 6   | 1 (0.2)                      | 1 (0.2)  | 0 (0)    | 0 (0)   | 0 (0)          | 0 (0)                     | 2 (0.3)     | 0 (0)                    | ND  |
| bone                               | 32  | 2 (0.1)                      | 2 (0.1)  | 0 (0)    | 2 (0.1) | 0 (0)          | 0 (0)                     | 7 (0.2)     | 0 (0)                    | ND  |
| breast                             | 42  | 8 (0.2)                      | 7 (0.2)  | 1 (0)    | 0 (0)   | 3 (0.1)        | 0 (0)                     | 18 (0.4)    | 0 (0)                    | ND  |
| central_nervous_system             | 55  | 4 (0.1)                      | 2 (0)    | 3 (0.1)  | 0 (0)   | 1 (0)          | 0 (0)                     | 10 (0.2)    | 0 (0)                    | ND  |
| cervix                             | 11  | 0 (0)                        | 1 (0.1)  | 2 (0.2)  | 1 (0.1) | 0 (0)          | 0 (0)                     | 1 (0.1)     | 0 (0)                    | ND  |
| endometrium                        | 9   | 0 (0)                        | 0 (0)    | 1 (0.1)  | 0 (0)   | 0 (0)          | 0 (0)                     | 2 (0.2)     | 0 (0)                    | ND  |
| eye                                | 1   | 0 (0)                        | 0 (0)    | 0 (0)    | 0 (0)   | 0 (0)          | 0 (0)                     | 0 (0)       | 0 (0)                    | ND  |
| gastrointestinal_tract             | 1   | 0 (0)                        | 0 (0)    | 0 (0)    | 0 (0)   | 0 (0)          | 0 (0)                     | 0 (0)       | 0 (0)                    | ND  |
| haematopoietic_and_lymphoid_tissue | 124 | 8 (0.1)                      | 2 (0)    | 5 (0)    | 2 (0)   | 2 (0)          | 0 (0)                     | 9 (0.1)     | 0 (0)                    | ND  |
| kidney                             | 20  | 3 (0.2)                      | 0 (0)    | 0 (0)    | 2 (0.1) | 2 (0.1)        | 0 (0)                     | 6 (0.3)     | 0 (0)                    | ND  |
| large_intestine                    | 36  | 13 (0.4)                     | 2 (0.1)  | 0 (0)    | 0 (0)   | 13 (0.4)       | 0 (0)                     | 22 (0.6)    | 1 (0)                    | ND  |
| liver                              | 8   | 0 (0)                        | 0 (0)    | 1 (0.1)  | 0 (0)   | 0 (0)          | 0 (0)                     | 0 (0)       | 0 (0)                    | ND  |
| lung                               | 145 | 12 (0.1)                     | 21 (0.1) | 12 (0.1) | 5 (0)   | 8 (0.1)        | 2 (0)                     | 44 (0.3)    | 0 (0)                    | ND  |
| oesophagus                         | 21  | 1 (0)                        | 3 (0.1)  | 2 (0.1)  | 1 (0)   | 0 (0)          | 0 (0)                     | 5 (0.2)     | 0 (0)                    | ND  |
| ovary                              | 22  | 8 (0.4)                      | 1 (0)    | 0 (0)    | 1 (0)   | 2 (0.1)        | 0 (0)                     | 12 (0.5)    | 0 (0)                    | ND  |
| pancreas                           | 17  | 3 (0.2)                      | 4 (0.2)  | 4 (0.2)  | 1 (0.1) | 1 (0.1)        | 0 (0)                     | 5 (0.3)     | 0 (0)                    | ND  |
| placenta                           | 2   | 0 (0)                        | 0 (0)    | 0 (0)    | 0 (0)   | 0 (0)          | 0 (0)                     | 2 (1)       | 0 (0)                    | ND  |
| pleura                             | 5   | 1 (0.2)                      | 1 (0.2)  | 0 (0)    | 0 (0)   | 0 (0)          | 0 (0)                     | 2 (0.4)     | 0 (0)                    | ND  |
| prostate                           | 5   | 2 (0.4)                      | 0 (0)    | 0 (0)    | 0 (0)   | 0 (0)          | 0 (0)                     | 2 (0.4)     | 0 (0)                    | ND  |
| skin                               | 51  | 4 (0.1)                      | 4 (0.1)  | 2 (0)    | 1 (0)   | 0 (0)          | 0 (0)                     | 9 (0.2)     | 0 (0)                    | ND  |
| small_intestine                    | 1   | 0 (0)                        | 1 (1)    | 0 (0)    | 0 (0)   | 0 (0)          | 0 (0)                     | 0 (0)       | 0 (0)                    | ND  |
| soft_tissue                        | 19  | 0 (0)                        | 2 (0.1)  | 2 (0.1)  | 0 (0)   | 1 (0.1)        | 0 (0)                     | 2 (0.1)     | 0 (0)                    | ND  |
| stomach                            | 21  | 4 (0.2)                      | 2 (0.1)  | 0 (0)    | 1 (0)   | 7 (0.3)        | 0 (0)                     | 9 (0.4)     | 0 (0)                    | ND  |
| testis                             | 3   | 1 (0.3)                      | 0 (0)    | 0 (0)    | 0 (0)   | 0 (0)          | 0 (0)                     | 1 (0.3)     | 0 (0)                    | ND  |
| thyroid                            | 11  | 1 (0.1)                      | 1 (0.1)  | 0 (0)    | 0 (0)   | 3 (0.3)        | 0 (0)                     | 6 (0.5)     | 0 (0)                    | ND  |
| not_specified                      | 1   | 0 (0)                        | 0 (0)    | 0 (0)    | 0 (0)   | 0 (0)          | 0 (0)                     | 0 (0)       | 0 (0)                    | ND  |
| upper_aerodigestive_tract          | 20  | 1 (0.1)                      | 1 (0.1)  | 0 (0)    | 0 (0)   | 3 (0.2)        | 0 (0)                     | 4 (0.2)     | 0 (0)                    | ND  |
| urinary_tract                      | 16  | 4 (0.3)                      | 1 (0.1)  | 0 (0)    | 0 (0)   | 0 (0)          | 0 (0)                     | 6 (0.4)     | 0 (0)                    | ND  |
| vulva                              | 3   | 0 (0)                        | 0 (0)    | 0 (0)    | 0 (0)   | 0 (0)          | 0 (0)                     | 0 (0)       | 0 (0)                    | ND  |

NEGR1 (Unknown)

| Cancer Cell lines                  |     | Somatic hemizygous deletions |          |         |         | Somatic<br>HDs | Somatic<br>Amplifications | Breakpoints | Known Cancer Gene Screen |     |
|------------------------------------|-----|------------------------------|----------|---------|---------|----------------|---------------------------|-------------|--------------------------|-----|
| Tissue                             | No  | <1Mb                         | >1Mb     | Arm     | Chr     |                |                           |             | Point Mutations          | HDs |
| adrenal_gland                      | 2   | 0 (0)                        | 1 (0.5)  | 0 (0)   | 0 (0)   | 0 (0)          | 0 (0)                     | 0 (0)       | 0 (0)                    | ND  |
| autonomic_ganglia                  | 36  | 3 (0.1)                      | 7 (0.2)  | 1 (0)   | 0 (0)   | 0 (0)          | 0 (0)                     | 5 (0.1)     | 0 (0)                    | ND  |
| biliary_tract                      | 6   | 1 (0.2)                      | 0 (0)    | 0 (0)   | 0 (0)   | 0 (0)          | 0 (0)                     | 1 (0.2)     | 0 (0)                    | ND  |
| bone                               | 32  | 1 (0)                        | 1 (0)    | 0 (0)   | 0 (0)   | 1 (0)          | 0 (0)                     | 3 (0.1)     | 0 (0)                    | ND  |
| breast                             | 42  | 0 (0)                        | 3 (0.1)  | 1 (0)   | 0 (0)   | 0 (0)          | 0 (0)                     | 1 (0)       | 0 (0)                    | ND  |
| central_nervous_system             | 55  | 1 (0)                        | 2 (0)    | 0 (0)   | 0 (0)   | 0 (0)          | 0 (0)                     | 6 (0.1)     | 0 (0)                    | ND  |
| cervix                             | 11  | 0 (0)                        | 0 (0)    | 2 (0.2) | 0 (0)   | 0 (0)          | 0 (0)                     | 1 (0.1)     | 0 (0)                    | ND  |
| endometrium                        | 9   | 0 (0)                        | 0 (0)    | 0 (0)   | 0 (0)   | 0 (0)          | 0 (0)                     | 0 (0)       | 0 (0)                    | ND  |
| eye                                | 1   | 0 (0)                        | 0 (0)    | 0 (0)   | 0 (0)   | 0 (0)          | 0 (0)                     | 0 (0)       | 0 (0)                    | ND  |
| gastrointestinal_tract             | 1   | 0 (0)                        | 0 (0)    | 0 (0)   | 0 (0)   | 0 (0)          | 0 (0)                     | 0 (0)       | 0 (0)                    | ND  |
| haematopoietic_and_lymphoid_tissue | 124 | 0 (0)                        | 4 (0)    | 1 (0)   | 0 (0)   | 0 (0)          | 0 (0)                     | 3 (0)       | 0 (0)                    | ND  |
| kidney                             | 20  | 1 (0.1)                      | 2 (0.1)  | 0 (0)   | 0 (0)   | 2 (0.1)        | 0 (0)                     | 5 (0.3)     | 0 (0)                    | ND  |
| large_intestine                    | 36  | 0 (0)                        | 3 (0.1)  | 0 (0)   | 0 (0)   | 0 (0)          | 0 (0)                     | 0 (0)       | 0 (0)                    | ND  |
| liver                              | 8   | 1 (0.1)                      | 2 (0.3)  | 0 (0)   | 0 (0)   | 0 (0)          | 0 (0)                     | 2 (0.3)     | 0 (0)                    | ND  |
| lung                               | 145 | 2 (0)                        | 15 (0.1) | 7 (0)   | 0 (0)   | 0 (0)          | 2 (0)                     | 8 (0.1)     | 1 (0)                    | ND  |
| oesophagus                         | 21  | 0 (0)                        | 2 (0.1)  | 0 (0)   | 0 (0)   | 1 (0)          | 0 (0)                     | 3 (0.1)     | 0 (0)                    | ND  |
| ovary                              | 22  | 0 (0)                        | 0 (0)    | 0 (0)   | 0 (0)   | 1 (0)          | 0 (0)                     | 1 (0)       | 0 (0)                    | ND  |
| pancreas                           | 17  | 0 (0)                        | 3 (0.2)  | 0 (0)   | 0 (0)   | 0 (0)          | 0 (0)                     | 0 (0)       | 0 (0)                    | ND  |
| placenta                           | 2   | 0 (0)                        | 0 (0)    | 0 (0)   | 0 (0)   | 0 (0)          | 0 (0)                     | 0 (0)       | 0 (0)                    | ND  |
| pleura                             | 5   | 0 (0)                        | 0 (0)    | 1 (0.2) | 0 (0)   | 0 (0)          | 0 (0)                     | 0 (0)       | 0 (0)                    | ND  |
| prostate                           | 5   | 0 (0)                        | 2 (0.4)  | 0 (0)   | 0 (0)   | 0 (0)          | 0 (0)                     | 1 (0.2)     | 0 (0)                    | ND  |
| skin                               | 51  | 0 (0)                        | 3 (0.1)  | 1 (0)   | 0 (0)   | 0 (0)          | 0 (0)                     | 1 (0)       | 0 (0)                    | ND  |
| small_intestine                    | 1   | 0 (0)                        | 0 (0)    | 0 (0)   | 0 (0)   | 0 (0)          | 0 (0)                     | 0 (0)       | 0 (0)                    | ND  |
| soft_tissue                        | 19  | 0 (0)                        | 3 (0.2)  | 1 (0.1) | 0 (0)   | 1 (0.1)        | 0 (0)                     | 1 (0.1)     | 0 (0)                    | ND  |
| stomach                            | 21  | 0 (0)                        | 1 (0)    | 1 (0)   | 0 (0)   | 0 (0)          | 0 (0)                     | 1 (0)       | 0 (0)                    | ND  |
| testis                             | 3   | 1 (0.3)                      | 0 (0)    | 0 (0)   | 0 (0)   | 0 (0)          | 0 (0)                     | 1 (0.3)     | 0 (0)                    | ND  |
| thyroid                            | 11  | 1 (0.1)                      | 1 (0.1)  | 0 (0)   | 1 (0.1) | 1 (0.1)        | 0 (0)                     | 3 (0.3)     | 0 (0)                    | ND  |
| not_specified                      | 1   | 0 (0)                        | 0 (0)    | 0 (0)   | 0 (0)   | 0 (0)          | 0 (0)                     | 0 (0)       | 0 (0)                    | ND  |
| upper_aerodigestive_tract          | 20  | 0 (0)                        | 1 (0.1)  | 0 (0)   | 0 (0)   | 0 (0)          | 0 (0)                     | 1 (0.1)     | 0 (0)                    | ND  |
| urinary_tract                      | 16  | 0 (0)                        | 0 (0)    | 1 (0.1) | 0 (0)   | 1 (0.1)        | 0 (0)                     | 1 (0.1)     | 0 (0)                    | ND  |
| vulva                              | 3   | 0 (0)                        | 0 (0)    | 0 (0)   | 0 (0)   | 0 (0)          | 0 (0)                     | 0 (0)       | 0 (0)                    | ND  |

CNTNAP2 (FRA)

| Cancer Cell lines                  |     | Somatic hemizygous deletions |          |         |         | Somatic HDs | Somatic Amplifications | Breakpoints | Known Cancer Gene Screen |     |
|------------------------------------|-----|------------------------------|----------|---------|---------|-------------|------------------------|-------------|--------------------------|-----|
| Tissue                             | Nº  | <1Mb                         | >1Mb     | Arm     | Chr     |             |                        |             | Point Mutations          | HDs |
| adrenal_gland                      | 2   | 0 (0)                        | 0 (0)    | 0 (0)   | 0 (0)   | 0 (0)       | 0 (0)                  | 2 (1)       | ND                       | ND  |
| autonomic_ganglia                  | 36  | 5 (0.1)                      | 2 (0.1)  | 0 (0)   | 0 (0)   | 0 (0)       | 0 (0)                  | 6 (0.2)     | ND                       | ND  |
| biliary_tract                      | 6   | 0 (0)                        | 0 (0)    | 0 (0)   | 0 (0)   | 0 (0)       | 0 (0)                  | 0 (0)       | ND                       | ND  |
| bone                               | 32  | 1 (0)                        | 2 (0.1)  | 0 (0)   | 0 (0)   | 0 (0)       | 0 (0)                  | 3 (0.1)     | ND                       | ND  |
| breast                             | 42  | 0 (0)                        | 9 (0.2)  | 0 (0)   | 0 (0)   | 0 (0)       | 0 (0)                  | 8 (0.2)     | ND                       | ND  |
| central_nervous_system             | 55  | 6 (0.1)                      | 4 (0.1)  | 0 (0)   | 3 (0.1) | 1 (0)       | 0 (0)                  | 11 (0.2)    | ND                       | ND  |
| cervix                             | 11  | 0 (0)                        | 1 (0.1)  | 1 (0.1) | 0 (0)   | 0 (0)       | 0 (0)                  | 0 (0)       | ND                       | ND  |
| endometrium                        | 9   | 0 (0)                        | 3 (0.3)  | 0 (0)   | 0 (0)   | 0 (0)       | 0 (0)                  | 1 (0.1)     | ND                       | ND  |
| eye                                | 1   | 0 (0)                        | 0 (0)    | 0 (0)   | 0 (0)   | 0 (0)       | 0 (0)                  | 0 (0)       | ND                       | ND  |
| gastrointestinal_tract             | 1   | 0 (0)                        | 0 (0)    | 0 (0)   | 0 (0)   | 0 (0)       | 0 (0)                  | 0 (0)       | ND                       | ND  |
| haematopoietic_and_lymphoid_tissue | 124 | 5 (0)                        | 10 (0.1) | 0 (0)   | 1 (0)   | 2 (0)       | 0 (0)                  | 8 (0.1)     | ND                       | ND  |
| kidney                             | 20  | 0 (0)                        | 0 (0)    | 0 (0)   | 0 (0)   | 0 (0)       | 0 (0)                  | 0 (0)       | ND                       | ND  |
| large_intestine                    | 36  | 3 (0.1)                      | 1 (0)    | 0 (0)   | 0 (0)   | 0 (0)       | 0 (0)                  | 5 (0.1)     | ND                       | ND  |
| liver                              | 8   | 0 (0)                        | 0 (0)    | 0 (0)   | 0 (0)   | 0 (0)       | 0 (0)                  | 1 (0.1)     | ND                       | ND  |
| lung                               | 145 | 6 (0)                        | 8 (0.1)  | 0 (0)   | 4 (0)   | 6 (0)       | 0 (0)                  | 26 (0.2)    | ND                       | ND  |
| oesophagus                         | 21  | 2 (0.1)                      | 2 (0.1)  | 1 (0)   | 1 (0)   | 1 (0)       | 0 (0)                  | 6 (0.3)     | ND                       | ND  |
| ovary                              | 22  | 0 (0)                        | 0 (0)    | 0 (0)   | 0 (0)   | 0 (0)       | 0 (0)                  | 4 (0.2)     | ND                       | ND  |
| pancreas                           | 17  | 0 (0)                        | 0 (0)    | 0 (0)   | 0 (0)   | 0 (0)       | 0 (0)                  | 0 (0)       | ND                       | ND  |
| placenta                           | 2   | 1 (0.5)                      | 0 (0)    | 0 (0)   | 0 (0)   | 0 (0)       | 0 (0)                  | 1 (0.5)     | ND                       | ND  |
| pleura                             | 5   | 0 (0)                        | 0 (0)    | 0 (0)   | 1 (0.2) | 0 (0)       | 0 (0)                  | 0 (0)       | ND                       | ND  |
| prostate                           | 5   | 0 (0)                        | 1 (0.2)  | 0 (0)   | 0 (0)   | 0 (0)       | 0 (0)                  | 1 (0.2)     | ND                       | ND  |
| skin                               | 51  | 3 (0.1)                      | 6 (0.1)  | 0 (0)   | 0 (0)   | 0 (0)       | 0 (0)                  | 10 (0.2)    | ND                       | ND  |
| small_intestine                    | 1   | 0 (0)                        | 0 (0)    | 0 (0)   | 0 (0)   | 0 (0)       | 0 (0)                  | 0 (0)       | ND                       | ND  |
| soft_tissue                        | 19  | 1 (0.1)                      | 0 (0)    | 0 (0)   | 1 (0.1) | 0 (0)       | 0 (0)                  | 4 (0.2)     | ND                       | ND  |
| stomach                            | 21  | 2 (0.1)                      | 2 (0.1)  | 0 (0)   | 0 (0)   | 0 (0)       | 0 (0)                  | 4 (0.2)     | ND                       | ND  |
| testis                             | 3   | 0 (0)                        | 0 (0)    | 0 (0)   | 0 (0)   | 0 (0)       | 0 (0)                  | 1 (0.3)     | ND                       | ND  |
| thyroid                            | 11  | 1 (0.1)                      | 1 (0.1)  | 0 (0)   | 0 (0)   | 0 (0)       | 0 (0)                  | 3 (0.3)     | ND                       | ND  |
| not specified                      | 1   | 0 (0)                        | 0 (0)    | 0 (0)   | 0 (0)   | 0 (0)       | 0 (0)                  | 0 (0)       | ND                       | ND  |
| upper_aerodigestive_tract          | 20  | 0 (0)                        | 3 (0.2)  | 1 (0.1) | 0 (0)   | 0 (0)       | 0 (0)                  | 0 (0)       | ND                       | ND  |
| urinary_tract                      | 16  | 1 (0.1)                      | 0 (0)    | 0 (0)   | 0 (0)   | 0 (0)       | 0 (0)                  | 2 (0.1)     | ND                       | ND  |
| vulva                              | 3   | 0 (0)                        | 0 (0)    | 0 (0)   | 0 (0)   | 0 (0)       | 0 (0)                  | 0 (0)       | ND                       | ND  |

CTNNA3 (FRA)

| Cancer Cell lines                  |     | Somatic hemizygous deletions |          |         |          | Somatic HDs | Somatic Amplifications | Breakpoints | Known Cancer Gene Screen |     |
|------------------------------------|-----|------------------------------|----------|---------|----------|-------------|------------------------|-------------|--------------------------|-----|
| Tissue                             | Nº  | <1Mb                         | >1Mb     | Arm     | Chr      |             |                        |             | Point Mutations          | HDs |
| adrenal_gland                      | 2   | 1 (0.5)                      | 0 (0)    | 0 (0)   | 0 (0)    | 0 (0)       | 0 (0)                  | 1 (0.5)     | ND                       | ND  |
| autonomic_ganglia                  | 36  | 3 (0.1)                      | 1 (0)    | 1 (0)   | 0 (0)    | 0 (0)       | 0 (0)                  | 4 (0.1)     | ND                       | ND  |
| biliary_tract                      | 6   | 0 (0)                        | 1 (0.2)  | 0 (0)   | 2 (0.3)  | 0 (0)       | 0 (0)                  | 0 (0)       | ND                       | ND  |
| bone                               | 32  | 2 (0.1)                      | 3 (0.1)  | 1 (0)   | 4 (0.1)  | 0 (0)       | 0 (0)                  | 2 (0.1)     | ND                       | ND  |
| breast                             | 42  | 1 (0)                        | 4 (0.1)  | 1 (0)   | 3 (0.1)  | 0 (0)       | 0 (0)                  | 3 (0.1)     | ND                       | ND  |
| central_nervous_system             | 55  | 0 (0)                        | 4 (0.1)  | 1 (0)   | 23 (0.4) | 0 (0)       | 0 (0)                  | 5 (0.1)     | ND                       | ND  |
| cervix                             | 11  | 0 (0)                        | 0 (0)    | 0 (0)   | 0 (0)    | 0 (0)       | 0 (0)                  | 0 (0)       | ND                       | ND  |
| endometrium                        | 9   | 0 (0)                        | 2 (0.2)  | 0 (0)   | 0 (0)    | 0 (0)       | 0 (0)                  | 1 (0.1)     | ND                       | ND  |
| eye                                | 1   | 0 (0)                        | 0 (0)    | 0 (0)   | 0 (0)    | 0 (0)       | 0 (0)                  | 0 (0)       | ND                       | ND  |
| gastrointestinal_tract             | 1   | 0 (0)                        | 0 (0)    | 0 (0)   | 1 (1)    | 0 (0)       | 0 (0)                  | 0 (0)       | ND                       | ND  |
| haematopoietic_and_lymphoid_tissue | 124 | 3 (0)                        | 6 (0)    | 1 (0)   | 2 (0)    | 0 (0)       | 0 (0)                  | 7 (0.1)     | ND                       | ND  |
| kidney                             | 20  | 0 (0)                        | 0 (0)    | 0 (0)   | 2 (0.1)  | 0 (0)       | 0 (0)                  | 0 (0)       | ND                       | ND  |
| large_intestine                    | 36  | 1 (0)                        | 1 (0)    | 0 (0)   | 1 (0)    | 0 (0)       | 0 (0)                  | 1 (0)       | ND                       | ND  |
| liver                              | 8   | 0 (0)                        | 1 (0.1)  | 1 (0.1) | 0 (0)    | 0 (0)       | 0 (0)                  | 0 (0)       | ND                       | ND  |
| lung                               | 145 | 0 (0)                        | 16 (0.1) | 2 (0)   | 22 (0.2) | 0 (0)       | 0 (0)                  | 9 (0.1)     | ND                       | ND  |
| oesophagus                         | 21  | 1 (0)                        | 1 (0)    | 2 (0.1) | 0 (0)    | 0 (0)       | 0 (0)                  | 2 (0.1)     | ND                       | ND  |
| ovary                              | 22  | 0 (0)                        | 2 (0.1)  | 1 (0)   | 1 (0)    | 0 (0)       | 0 (0)                  | 0 (0)       | ND                       | ND  |
| pancreas                           | 17  | 0 (0)                        | 1 (0.1)  | 0 (0)   | 1 (0.1)  | 0 (0)       | 0 (0)                  | 1 (0.1)     | ND                       | ND  |
| placenta                           | 2   | 0 (0)                        | 0 (0)    | 0 (0)   | 0 (0)    | 0 (0)       | 0 (0)                  | 0 (0)       | ND                       | ND  |
| pleura                             | 5   | 0 (0)                        | 0 (0)    | 0 (0)   | 0 (0)    | 0 (0)       | 0 (0)                  | 0 (0)       | ND                       | ND  |
| prostate                           | 5   | 0 (0)                        | 0 (0)    | 0 (0)   | 0 (0)    | 0 (0)       | 1 (0.2)                | 1 (0.2)     | ND                       | ND  |
| skin                               | 51  | 0 (0)                        | 5 (0.1)  | 0 (0)   | 13 (0.3) | 0 (0)       | 0 (0)                  | 3 (0.1)     | ND                       | ND  |
| small_intestine                    | 1   | 0 (0)                        | 0 (0)    | (0)     | 0 (0)    | 0 (0)       | 0 (0)                  | 0 (0)       | ND                       | ND  |
| soft_tissue                        | 19  | 0 (0)                        | 0 (0)    | 0 (0)   | 0 (0)    | 1 (0.1)     | 0 (0)                  | 2 (0.1)     | ND                       | ND  |
| stomach                            | 21  | 3 (0.1)                      | 2 (0.1)  | 1 (0)   | 2 (0.1)  | 0 (0)       | 0 (0)                  | 4 (0.2)     | ND                       | ND  |
| testis                             | 3   | 0 (0)                        | 0 (0)    | 1 (0.3) | 1 (0.3)  | 0 (0)       | 0 (0)                  | 0 (0)       | ND                       | ND  |
| thyroid                            | 11  | 1 (0.1)                      | 0 (0)    | 0 (0)   | 2 (0.2)  | 1 (0.1)     | 0 (0)                  | 3 (0.3)     | ND                       | ND  |
| not specified                      | 1   | 0 (0)                        | 0 (0)    | 0 (0)   | 0 (0)    | 0 (0)       | 0 (0)                  | 0 (0)       | ND                       | ND  |
| upper_aerodigestive_tract          | 20  | 0 (0)                        | 1 (0.1)  | 0 (0)   | 0 (0)    | 0 (0)       | 0 (0)                  | 1 (0.1)     | ND                       | ND  |
| urinary_tract                      | 16  | 2 (0.1)                      | 5 (0.3)  | 0 (0)   | 2 (0.1)  | 0 (0)       | 0 (0)                  | 6 (0.4)     | ND                       | ND  |
| vulva                              | 3   | 0 (0)                        | 0 (0)    | 0 (0)   | 0 (0)    | 0 (0)       | 0 (0)                  | 0 (0)       | ND                       | ND  |

DAB1 (FRA)

| Cancer Cell lines                  |     | Somatic hemizygous deletions |          |         |         | Somatic HDs | Somatic Amplifications | Breakpoints | Known Cancer Gene Screen |     |
|------------------------------------|-----|------------------------------|----------|---------|---------|-------------|------------------------|-------------|--------------------------|-----|
| Tissue                             | Nº  | <1Mb                         | >1Mb     | Arm     | Chr     |             |                        |             | Point Mutations          | HDs |
| adrenal_gland                      | 2   | 0 (0)                        | 1 (0.5)  | 0 (0)   | 0 (0)   | 0 (0)       | 0 (0)                  | 0 (0)       | ND                       | ND  |
| autonomic_ganglia                  | 36  | 0 (0)                        | 6 (0.2)  | 1 (0)   | 0 (0)   | 0 (0)       | 0 (0)                  | 3 (0.1)     | ND                       | ND  |
| biliary_tract                      | 6   | 0 (0)                        | 0 (0)    | 0 (0)   | 0 (0)   | 0 (0)       | 0 (0)                  | 0 (0)       | ND                       | ND  |
| bone                               | 32  | 0 (0)                        | 2 (0.1)  | 0 (0)   | 0 (0)   | 0 (0)       | 0 (0)                  | 2 (0.1)     | ND                       | ND  |
| breast                             | 42  | 1 (0)                        | 3 (0.1)  | 1 (0)   | 0 (0)   | 0 (0)       | 0 (0)                  | 5 (0.1)     | ND                       | ND  |
| central_nervous_system             | 55  | 1 (0)                        | 0 (0)    | 0 (0)   | 0 (0)   | 0 (0)       | 0 (0)                  | 2 (0)       | ND                       | ND  |
| cervix                             | 11  | 0 (0)                        | 0 (0)    | 2 (0.2) | 0 (0)   | 0 (0)       | 0 (0)                  | 1 (0.1)     | ND                       | ND  |
| endometrium                        | 9   | 0 (0)                        | 0 (0)    | 0 (0)   | 0 (0)   | 0 (0)       | 0 (0)                  | 0 (0)       | ND                       | ND  |
| eye                                | 1   | 0 (0)                        | 0 (0)    | 0 (0)   | 0 (0)   | 0 (0)       | 0 (0)                  | 0 (0)       | ND                       | ND  |
| gastrointestinal_tract             | 1   | 0 (0)                        | 0 (0)    | 0 (0)   | 0 (0)   | 0 (0)       | 0 (0)                  | 0 (0)       | ND                       | ND  |
| haematopoietic_and_lymphoid_tissue | 124 | 1 (0)                        | 2 (0)    | 1 (0)   | 0 (0)   | 0 (0)       | 0 (0)                  | 2 (0)       | ND                       | ND  |
| kidney                             | 20  | 0 (0)                        | 0 (0)    | 0 (0)   | 0 (0)   | 0 (0)       | 0 (0)                  | 1 (0.1)     | ND                       | ND  |
| large_intestine                    | 36  | 0 (0)                        | 3 (0.1)  | 0 (0)   | 0 (0)   | 0 (0)       | 0 (0)                  | 0 (0)       | ND                       | ND  |
| liver                              | 8   | 0 (0)                        | 2 (0.3)  | 0 (0)   | 0 (0)   | 0 (0)       | 0 (0)                  | 0 (0)       | ND                       | ND  |
| lung                               | 145 | 4 (0)                        | 16 (0.1) | 7 (0)   | 0 (0)   | 0 (0)       | 0 (0)                  | 7 (0)       | ND                       | ND  |
| oesophagus                         | 21  | 0 (0)                        | 3 (0.1)  | 0 (0)   | 0 (0)   | 0 (0)       | 0 (0)                  | 2 (0.1)     | ND                       | ND  |
| ovary                              | 22  | 2 (0.1)                      | 0 (0)    | 0 (0)   | 0 (0)   | 0 (0)       | 0 (0)                  | 2 (0.1)     | ND                       | ND  |
| pancreas                           | 17  | 0 (0)                        | 1 (0.1)  | 0 (0)   | 0 (0)   | 0 (0)       | 0 (0)                  | 1 (0.1)     | ND                       | ND  |
| placenta                           | 2   | 0 (0)                        | 0 (0)    | 0 (0)   | 0 (0)   | 0 (0)       | 0 (0)                  | 0 (0)       | ND                       | ND  |
| pleura                             | 5   | 0 (0)                        | 0 (0)    | 1 (0.2) | 0 (0)   | 0 (0)       | 0 (0)                  | 0 (0)       | ND                       | ND  |
| prostate                           | 5   | 0 (0)                        | 0 (0)    | 0 (0)   | 0 (0)   | 0 (0)       | 0 (0)                  | 0 (0)       | ND                       | ND  |
| skin                               | 51  | 0 (0)                        | 3 (0.1)  | 1 (0)   | 0 (0)   | 0 (0)       | 0 (0)                  | 0 (0)       | ND                       | ND  |
| small_intestine                    | 1   | 0 (0)                        | 0 (0)    | 0 (0)   | 0 (0)   | 0 (0)       | 0 (0)                  | 0 (0)       | ND                       | ND  |
| soft_tissue                        | 19  | 0 (0)                        | 2 (0.1)  | 1 (0.1) | 0 (0)   | 0 (0)       | 0 (0)                  | 2 (0.1)     | ND                       | ND  |
| stomach                            | 21  | 0 (0)                        | 0 (0)    | 1 (0)   | 0 (0)   | 0 (0)       | 0 (0)                  | 1 (0)       | ND                       | ND  |
| testis                             | 3   | 0 (0)                        | 0 (0)    | 0 (0)   | 0 (0)   | 0 (0)       | 0 (0)                  | 0 (0)       | ND                       | ND  |
| thyroid                            | 11  | 0 (0)                        | 1 (0.1)  | 0 (0)   | 1 (0.1) | 0 (0)       | 0 (0)                  | 0 (0)       | ND                       | ND  |
| not_specified                      | 1   | 0 (0)                        | 0 (0)    | 0 (0)   | 0 (0)   | 0 (0)       | 0 (0)                  | 0 (0)       | ND                       | ND  |
| upper_aerodigestive_tract          | 20  | 0 (0)                        | 1 (0.1)  | 0 (0)   | 0 (0)   | 0 (0)       | 0 (0)                  | 0 (0)       | ND                       | ND  |
| urinary_tract                      | 16  | 0 (0)                        | 0 (0)    | 1 (0.1) | 0 (0)   | 0 (0)       | 0 (0)                  | 0 (0)       | ND                       | ND  |
| vulva                              | 3   | 0 (0)                        | 0 (0)    | 0 (0)   | 0 (0)   | 0 (0)       | 0 (0)                  | 0 (0)       | ND                       | ND  |

DLG2 (FRA)

| Cancer Cell lines                  |     | Somatic hemizygous deletions |          |         |         | Somatic HDs | Somatic Amplifications | Breakpoints | Known Cancer Gene Screen |     |
|------------------------------------|-----|------------------------------|----------|---------|---------|-------------|------------------------|-------------|--------------------------|-----|
| Tissue                             | Nº  | <1Mb                         | >1Mb     | Arm     | Chr     |             |                        |             | Point Mutations          | HDs |
| adrenal_gland                      | 2   | 0 (0)                        | 0 (0)    | 0 (0)   | 0 (0)   | 0 (0)       | 0 (0)                  | 0 (0)       | ND                       | ND  |
| autonomic_ganglia                  | 36  | 0 (0)                        | 3 (0.1)  | 0 (0)   | 1 (0)   | 1 (0)       | 0 (0)                  | 2 (0.1)     | ND                       | ND  |
| biliary_tract                      | 6   | 0 (0)                        | 0 (0)    | 0 (0)   | 0 (0)   | 0 (0)       | 0 (0)                  | 1 (0.2)     | ND                       | ND  |
| bone                               | 32  | 0 (0)                        | 7 (0.2)  | 0 (0)   | 3 (0.1) | 3 (0.1)     | 0 (0)                  | 6 (0.2)     | ND                       | ND  |
| breast                             | 42  | 0 (0)                        | 13 (0.3) | 0 (0)   | 0 (0)   | 0 (0)       | 0 (0)                  | 3 (0.1)     | ND                       | ND  |
| central_nervous_system             | 55  | 4 (0.1)                      | 2 (0)    | 0 (0)   | 0 (0)   | 0 (0)       | 0 (0)                  | 7 (0.1)     | ND                       | ND  |
| cervix                             | 11  | 0 (0)                        | 3 (0.3)  | 0 (0)   | 0 (0)   | 0 (0)       | 0 (0)                  | 2 (0.2)     | ND                       | ND  |
| endometrium                        | 9   | 1 (0.1)                      | 0 (0)    | 0 (0)   | 0 (0)   | 0 (0)       | 0 (0)                  | 1 (0.1)     | ND                       | ND  |
| eye                                | 1   | 0 (0)                        | 0 (0)    | 0 (0)   | 0 (0)   | 0 (0)       | 0 (0)                  | 0 (0)       | ND                       | ND  |
| gastrointestinal_tract             | 1   | 1 (1)                        | 0 (0)    | 0 (0)   | 0 (0)   | 0 (0)       | 0 (0)                  | 1 (1)       | ND                       | ND  |
| haematopoietic_and_lymphoid_tissue | 124 | 4 (0)                        | 8 (0.1)  | 0 (0)   | 0 (0)   | 1 (0)       | 0 (0)                  | 14 (0.1)    | ND                       | ND  |
| kidney                             | 20  | 2 (0.1)                      | 4 (0.2)  | 0 (0)   | 1 (0.1) | 1 (0.1)     | 0 (0)                  | 5 (0.3)     | ND                       | ND  |
| large_intestine                    | 36  | 1 (0)                        | 3 (0.1)  | 0 (0)   | 0 (0)   | 0 (0)       | 0 (0)                  | 4 (0.1)     | ND                       | ND  |
| liver                              | 8   | 0 (0)                        | 2 (0.3)  | 0 (0)   | 0 (0)   | 0 (0)       | 0 (0)                  | 0 (0)       | ND                       | ND  |
| lung                               | 145 | 4 (0)                        | 20 (0.1) | 0 (0)   | 3 (0)   | 3 (0)       | 0 (0)                  | 17 (0.1)    | ND                       | ND  |
| oesophagus                         | 21  | 0 (0)                        | 7 (0.3)  | 0 (0)   | 0 (0)   | 0 (0)       | 0 (0)                  | 1 (0)       | ND                       | ND  |
| ovary                              | 22  | 1 (0)                        | 1 (0)    | 0 (0)   | 0 (0)   | 0 (0)       | 0 (0)                  | 2 (0.1)     | ND                       | ND  |
| pancreas                           | 17  | 1 (0.1)                      | 3 (0.2)  | 0 (0)   | 0 (0)   | 0 (0)       | 0 (0)                  | 3 (0.2)     | ND                       | ND  |
| placenta                           | 2   | 2 (1)                        | 0 (0)    | 0 (0)   | 0 (0)   | 0 (0)       | 0 (0)                  | 2 (1)       | ND                       | ND  |
| pleura                             | 5   | 1 (0.2)                      | 0 (0)    | 0 (0)   | 0 (0)   | 0 (0)       | 0 (0)                  | 1 (0.2)     | ND                       | ND  |
| prostate                           | 5   | 0 (0)                        | 0 (0)    | 0 (0)   | 0 (0)   | 0 (0)       | 0 (0)                  | 0 (0)       | ND                       | ND  |
| skin                               | 51  | 2 (0)                        | 8 (0.2)  | 1 (0)   | 3 (0.1) | 0 (0)       | 0 (0)                  | 6 (0.1)     | ND                       | ND  |
| small_intestine                    | 1   | 0 (0)                        | 0 (0)    | 0 (0)   | 0 (0)   | 0 (0)       | 0 (0)                  | 0 (0)       | ND                       | ND  |
| soft_tissue                        | 19  | 1 (0.1)                      | 1 (0.1)  | 0 (0)   | 2 (0.1) | 0 (0)       | 0 (0)                  | 2 (0.1)     | ND                       | ND  |
| stomach                            | 21  | 0 (0)                        | 1 (0)    | 0 (0)   | 0 (0)   | 0 (0)       | 0 (0)                  | 3 (0.1)     | ND                       | ND  |
| testis                             | 3   | 0 (0)                        | 2 (0.7)  | 0 (0)   | 0 (0)   | 0 (0)       | 0 (0)                  | 1 (0.3)     | ND                       | ND  |
| thyroid                            | 11  | 0 (0)                        | 1 (0.1)  | 0 (0)   | 1 (0.1) | 0 (0)       | 0 (0)                  | 3 (0.3)     | ND                       | ND  |
| not_specified                      | 1   | 0 (0)                        | 0 (0)    | 0 (0)   | 0 (0)   | 0 (0)       | 0 (0)                  | 0 (0)       | ND                       | ND  |
| upper_aerodigestive_tract          | 20  | 0 (0)                        | 6 (0.3)  | 2 (0.1) | 0 (0)   | 0 (0)       | 0 (0)                  | 2 (0.1)     | ND                       | ND  |
| urinary_tract                      | 16  | 3 (0.2)                      | 2 (0.1)  | 0 (0)   | 0 (0)   | 0 (0)       | 0 (0)                  | 2 (0.1)     | ND                       | ND  |
| vulva                              | 3   | 0 (0)                        | 2 (0.7)  | 0 (0)   | 0 (0)   | 0 (0)       | 0 (0)                  | 0 (0)       | ND                       | ND  |

DPYD (FRA)

| Cancer Cell lines                  |     | Somatic hemizygous deletions |          |         |         | Somatic HDs | Somatic Amplifications | Breakpoints | Known Cancer Gene Screen |     |
|------------------------------------|-----|------------------------------|----------|---------|---------|-------------|------------------------|-------------|--------------------------|-----|
| Tissue                             | Nº  | <1Mb                         | >1Mb     | Arm     | Chr     |             |                        |             | Point Mutations          | HDs |
| adrenal_gland                      | 2   | 0 (0)                        | 1 (0.5)  | 0 (0)   | 0 (0)   | 0 (0)       | 0 (0)                  | 0 (0)       | ND                       | ND  |
| autonomic_ganglia                  | 36  | 0 (0)                        | 3 (0.1)  | 1 (0)   | 0 (0)   | 0 (0)       | 0 (0)                  | 1 (0)       | ND                       | ND  |
| biliary_tract                      | 6   | 0 (0)                        | 0 (0)    | 0 (0)   | 0 (0)   | 0 (0)       | 0 (0)                  | 0 (0)       | ND                       | ND  |
| bone                               | 32  | 0 (0)                        | 0 (0)    | 0 (0)   | 0 (0)   | 0 (0)       | 0 (0)                  | 1 (0)       | ND                       | ND  |
| breast                             | 42  | 0 (0)                        | 5 (0.1)  | 1 (0)   | 0 (0)   | 0 (0)       | 0 (0)                  | 4 (0.1)     | ND                       | ND  |
| central_nervous_system             | 55  | 0 (0)                        | 4 (0.1)  | 0 (0)   | 0 (0)   | 0 (0)       | 0 (0)                  | 3 (0.1)     | ND                       | ND  |
| cervix                             | 11  | 0 (0)                        | 0 (0)    | 2 (0.2) | 0 (0)   | 0 (0)       | 0 (0)                  | 0 (0)       | ND                       | ND  |
| endometrium                        | 9   | 0 (0)                        | 0 (0)    | 0 (0)   | 0 (0)   | 0 (0)       | 0 (0)                  | 0 (0)       | ND                       | ND  |
| eye                                | 1   | 0 (0)                        | 0 (0)    | 0 (0)   | 0 (0)   | 0 (0)       | 0 (0)                  | 0 (0)       | ND                       | ND  |
| gastrointestinal_tract             | 1   | 0 (0)                        | 0 (0)    | 0 (0)   | 0 (0)   | 0 (0)       | 0 (0)                  | 0 (0)       | ND                       | ND  |
| haematopoietic_and_lymphoid_tissue | 124 | 0 (0)                        | 3 (0)    | 1 (0)   | 0 (0)   | 0 (0)       | 0 (0)                  | 2 (0)       | ND                       | ND  |
| kidney                             | 20  | 0 (0)                        | 0 (0)    | 0 (0)   | 0 (0)   | 0 (0)       | 0 (0)                  | 0 (0)       | ND                       | ND  |
| large_intestine                    | 36  | 1 (0)                        | 5 (0.1)  | 0 (0)   | 0 (0)   | 0 (0)       | 0 (0)                  | 2 (0.1)     | ND                       | ND  |
| liver                              | 8   | 0 (0)                        | 2 (0.3)  | 0 (0)   | 0 (0)   | 0 (0)       | 0 (0)                  | 1 (0.1)     | ND                       | ND  |
| lung                               | 145 | 0 (0)                        | 16 (0.1) | 7 (0)   | 0 (0)   | 0 (0)       | 0 (0)                  | 2 (0)       | ND                       | ND  |
| oesophagus                         | 21  | 2 (0.1)                      | 0 (0)    | 0 (0)   | 0 (0)   | 0 (0)       | 0 (0)                  | 3 (0.1)     | ND                       | ND  |
| ovary                              | 22  | 0 (0)                        | 0 (0)    | 0 (0)   | 0 (0)   | 0 (0)       | 0 (0)                  | 2 (0.1)     | ND                       | ND  |
| pancreas                           | 17  | 0 (0)                        | 1 (0.1)  | 0 (0)   | 0 (0)   | 0 (0)       | 0 (0)                  | 2 (0.1)     | ND                       | ND  |
| placenta                           | 2   | 0 (0)                        | 0 (0)    | 0 (0)   | 0 (0)   | 0 (0)       | 0 (0)                  | 0 (0)       | ND                       | ND  |
| pleura                             | 5   | 0 (0)                        | 1 (0.2)  | 1 (0.2) | 0 (0)   | 0 (0)       | 0 (0)                  | 0 (0)       | ND                       | ND  |
| prostate                           | 5   | 0 (0)                        | 0 (0)    | 0 (0)   | 0 (0)   | 0 (0)       | 0 (0)                  | 0 (0)       | ND                       | ND  |
| skin                               | 51  | 2 (0)                        | 4 (0.1)  | 1 (0)   | 0 (0)   | 0 (0)       | 0 (0)                  | 3 (0.1)     | ND                       | ND  |
| small_intestine                    | 1   | 0 (0)                        | 0 (0)    | 0 (0)   | 0 (0)   | 0 (0)       | 0 (0)                  | 0 (0)       | ND                       | ND  |
| soft_tissue                        | 19  | 0 (0)                        | 1 (0.1)  | 1 (0.1) | 0 (0)   | 0 (0)       | 0 (0)                  | 1 (0.1)     | ND                       | ND  |
| stomach                            | 21  | 0 (0)                        | 1 (0)    | 1 (0)   | 0 (0)   | 0 (0)       | 0 (0)                  | 0 (0)       | ND                       | ND  |
| testis                             | 3   | 0 (0)                        | 0 (0)    | 0 (0)   | 0 (0)   | 0 (0)       | 0 (0)                  | 0 (0)       | ND                       | ND  |
| thyroid                            | 11  | 1 (0.1)                      | 1 (0.1)  | 0 (0)   | 1 (0.1) | 0 (0)       | 0 (0)                  | 1 (0.1)     | ND                       | ND  |
| not specified                      | 1   | 0 (0)                        | 0 (0)    | 0 (0)   | 0 (0)   | 0 (0)       | 0 (0)                  | 0 (0)       | ND                       | ND  |
| upper_aerodigestive_tract          | 20  | 0 (0)                        | 0 (0)    | 0 (0)   | 0 (0)   | 1 (0.1)     | 0 (0)                  | 1 (0.1)     | ND                       | ND  |
| urinary_tract                      | 16  | 0 (0)                        | 0 (0)    | 1 (0.1) | 0 (0)   | 0 (0)       | 0 (0)                  | 1 (0.1)     | ND                       | ND  |
| vulva                              | 3   | 0 (0)                        | 0 (0)    | 0 (0)   | 0 (0)   | 0 (0)       | 0 (0)                  | 0 (0)       | ND                       | ND  |

FHIT (FRA)

| Cancer Cell lines                  |     | Somatic hemizygous deletions |          |          |         | Somatic HDs | Somatic Amplifications | Breakpoints | Known Cancer Gene Screen |     |
|------------------------------------|-----|------------------------------|----------|----------|---------|-------------|------------------------|-------------|--------------------------|-----|
| Tissue                             | Nº  | <1Mb                         | >1Mb     | Arm      | Chr     |             |                        |             | Point Mutations          | HDs |
| adrenal_gland                      | 2   | 0 (0)                        | 0 (0)    | 0 (0)    | 0 (0)   | 1 (0.5)     | 0 (0)                  | 1 (0.5)     | 0 (0)                    | ND  |
| autonomic_ganglia                  | 36  | 1 (0)                        | 7 (0.2)  | 3 (0.1)  | 0 (0)   | 1 (0)       | 0 (0)                  | 4 (0.1)     | 0 (0)                    | ND  |
| biliary_tract                      | 6   | 0 (0)                        | 0 (0)    | 1 (0.2)  | 0 (0)   | 2 (0.3)     | 0 (0)                  | 3 (0.5)     | 0 (0)                    | ND  |
| bone                               | 32  | 1 (0)                        | 6 (0.2)  | 0 (0)    | 1 (0)   | 0 (0)       | 0 (0)                  | 3 (0.1)     | 0 (0)                    | ND  |
| breast                             | 42  | 2 (0)                        | 5 (0.1)  | 0 (0)    | 0 (0)   | 0 (0)       | 0 (0)                  | 5 (0.1)     | 0 (0)                    | ND  |
| central_nervous_system             | 55  | 0 (0)                        | 2 (0)    | 1 (0)    | 1 (0)   | 0 (0)       | 0 (0)                  | 3 (0.1)     | 0 (0)                    | ND  |
| cervix                             | 11  | 2 (0.2)                      | 0 (0)    | 1 (0.1)  | 1 (0.1) | 2 (0.2)     | 0 (0)                  | 6 (0.5)     | 0 (0)                    | ND  |
| endometrium                        | 9   | 2 (0.2)                      | 0 (0)    | 0 (0)    | 0 (0)   | 0 (0)       | 0 (0)                  | 1 (0.1)     | 0 (0)                    | ND  |
| eye                                | 1   | 0 (0)                        | 0 (0)    | 0 (0)    | 0 (0)   | 0 (0)       | 0 (0)                  | 0 (0)       | 0 (0)                    | ND  |
| gastrointestinal_tract             | 1   | 0 (0)                        | 0 (0)    | 1 (1)    | 0 (0)   | 0 (0)       | 0 (0)                  | 0 (0)       | 0 (0)                    | ND  |
| haematopoietic_and_lymphoid_tissue | 124 | 7 (0.1)                      | 6 (0)    | 0 (0)    | 1 (0)   | 1 (0)       | 0 (0)                  | 19 (0.2)    | 0 (0)                    | ND  |
| kidney                             | 20  | 1 (0.1)                      | 5 (0.3)  | 1 (0.1)  | 0 (0)   | 0 (0)       | 0 (0)                  | 4 (0.2)     | 0 (0)                    | ND  |
| large_intestine                    | 36  | 9 (0.3)                      | 2 (0.1)  | 0 (0)    | 1 (0)   | 13 (0.4)    | 0 (0)                  | 23 (0.6)    | 0 (0)                    | ND  |
| liver                              | 8   | 1 (0.1)                      | 1 (0.1)  | 0 (0)    | 0 (0)   | 1 (0.1)     | 0 (0)                  | 2 (0.3)     | 0 (0)                    | ND  |
| lung                               | 145 | 7 (0)                        | 24 (0.2) | 23 (0.2) | 6 (0)   | 5 (0)       | 0 (0)                  | 30 (0.2)    | 0 (0)                    | ND  |
| oesophagus                         | 21  | 3 (0.1)                      | 2 (0.1)  | 4 (0.2)  | 0 (0)   | 6 (0.3)     | 0 (0)                  | 8 (0.4)     | 0 (0)                    | ND  |
| ovary                              | 22  | 2 (0.1)                      | 1 (0)    | 0 (0)    | 0 (0)   | 3 (0.1)     | 0 (0)                  | 7 (0.3)     | 0 (0)                    | ND  |
| pancreas                           | 17  | 1 (0.1)                      | 3 (0.2)  | 1 (0.1)  | 0 (0)   | 4 (0.2)     | 0 (0)                  | 9 (0.5)     | 0 (0)                    | ND  |
| placenta                           | 2   | 1 (0.5)                      | 0 (0)    | 0 (0)    | 0 (0)   | 0 (0)       | 0 (0)                  | 2 (1)       | 0 (0)                    | ND  |
| pleura                             | 5   | 0 (0)                        | 2 (0.4)  | 0 (0)    | 0 (0)   | 0 (0)       | 0 (0)                  | 1 (0.2)     | 0 (0)                    | ND  |
| prostate                           | 5   | 0 (0)                        | 2 (0.4)  | 0 (0)    | 0 (0)   | 0 (0)       | 0 (0)                  | 0 (0)       | 0 (0)                    | ND  |
| skin                               | 51  | 1 (0)                        | 6 (0.1)  | 3 (0.1)  | 0 (0)   | 0 (0)       | 0 (0)                  | 4 (0.1)     | 0 (0)                    | ND  |
| small_intestine                    | 1   | 0 (0)                        | 0 (0)    | 0 (0)    | 0 (0)   | 2 (2)       | 0 (0)                  | 1 (1)       | 0 (0)                    | ND  |
| soft_tissue                        | 19  | 1 (0.1)                      | 4 (0.2)  | 0 (0)    | 0 (0)   | 0 (0)       | 0 (0)                  | 2 (0.1)     | 0 (0)                    | ND  |
| stomach                            | 21  | 9 (0.4)                      | 3 (0.1)  | 0 (0)    | 1 (0)   | 15 (0.7)    | 0 (0)                  | 16 (0.8)    | 0 (0)                    | ND  |
| testis                             | 3   | 0 (0)                        | 1 (0.3)  | 0 (0)    | 0 (0)   | 0 (0)       | 0 (0)                  | 1 (0.3)     | 0 (0)                    | ND  |
| thyroid                            | 11  | 1 (0.1)                      | 1 (0.1)  | 0 (0)    | 1 (0.1) | 2 (0.2)     | 0 (0)                  | 4 (0.4)     | 0 (0)                    | ND  |
| not specified                      | 1   | 0 (0)                        | 0 (0)    | 0 (0)    | 0 (0)   | 1 (1)       | 0 (0)                  | 1 (1)       | 0 (0)                    | ND  |
| upper_aerodigestive_tract          | 20  | 1 (0.1)                      | 0 (0)    | 3 (0.2)  | 0 (0)   | 4 (0.2)     | 0 (0)                  | 6 (0.3)     | 0 (0)                    | ND  |
| urinary_tract                      | 16  | 1 (0.1)                      | 0 (0)    | 0 (0)    | 0 (0)   | 2 (0.1)     | 0 (0)                  | 4 (0.3)     | 0 (0)                    | ND  |
| vulva                              | 3   | 0 (0)                        | 1 (0.3)  | 0 (0)    | 0 (0)   | 0 (0)       | 0 (0)                  | 1 (0.3)     | 0 (0)                    | ND  |

GRID2 (FRA)

| Cancer Cell lines                  |     | Somatic hemizygous deletions |          |         |         | Somatic HDs | Somatic Amplifications | Breakpoints | Known Cancer Gene Screen |     |
|------------------------------------|-----|------------------------------|----------|---------|---------|-------------|------------------------|-------------|--------------------------|-----|
| Tissue                             | Nº  | <1Mb                         | >1Mb     | Arm     | Chr     |             |                        |             | Point Mutations          | HDs |
| adrenal_gland                      | 2   | 0 (0)                        | 0 (0)    | 0 (0)   | 0 (0)   | 1 (0.5)     | 0 (0)                  | 1 (0.5)     | ND                       | ND  |
| autonomic_ganglia                  | 36  | 1 (0)                        | 0 (0)    | 0 (0)   | 0 (0)   | 0 (0)       | 0 (0)                  | 1 (0)       | ND                       | ND  |
| biliary_tract                      | 6   | 0 (0)                        | 0 (0)    | 0 (0)   | 0 (0)   | 1 (0.2)     | 0 (0)                  | 1 (0.2)     | ND                       | ND  |
| bone                               | 32  | 2 (0.1)                      | 3 (0.1)  | 0 (0)   | 1 (0)   | 0 (0)       | 0 (0)                  | 1 (0)       | ND                       | ND  |
| breast                             | 42  | 0 (0)                        | 2 (0)    | 0 (0)   | 4 (0.1) | 0 (0)       | 0 (0)                  | 2 (0)       | ND                       | ND  |
| central_nervous_system             | 55  | 1 (0)                        | 3 (0.1)  | 1 (0)   | 1 (0)   | 0 (0)       | 0 (0)                  | 2 (0)       | ND                       | ND  |
| cervix                             | 11  | 0 (0)                        | 1 (0.1)  | 0 (0)   | 1 (0.1) | 0 (0)       | 0 (0)                  | 0 (0)       | ND                       | ND  |
| endometrium                        | 9   | 0 (0)                        | 1 (0.1)  | 0 (0)   | 0 (0)   | 0 (0)       | 0 (0)                  | 1 (0.1)     | ND                       | ND  |
| eye                                | 1   | 0 (0)                        | 0 (0)    | 0 (0)   | 0 (0)   | 0 (0)       | 0 (0)                  | 0 (0)       | ND                       | ND  |
| gastrointestinal_tract             | 1   | 0 (0)                        | 0 (0)    | 0 (0)   | 0 (0)   | 0 (0)       | 0 (0)                  | 0 (0)       | ND                       | ND  |
| haematopoietic_and_lymphoid_tissue | 124 | 2 (0)                        | 0 (0)    | 0 (0)   | 0 (0)   | 1 (0)       | 0 (0)                  | 3 (0)       | ND                       | ND  |
| kidney                             | 20  | 0 (0)                        | 1 (0.1)  | 2 (0.1) | 1 (0.1) | 0 (0)       | 0 (0)                  | 1 (0.1)     | ND                       | ND  |
| large_intestine                    | 36  | 0 (0)                        | 3 (0.1)  | 0 (0)   | 1 (0)   | 1 (0)       | 0 (0)                  | 3 (0.1)     | ND                       | ND  |
| liver                              | 8   | 0 (0)                        | 2 (0.3)  | 0 (0)   | 0 (0)   | 0 (0)       | 0 (0)                  | 1 (0.1)     | ND                       | ND  |
| lung                               | 145 | 1 (0)                        | 26 (0.2) | 3 (0)   | 2 (0)   | 1 (0)       | 0 (0)                  | 12 (0.1)    | ND                       | ND  |
| oesophagus                         | 21  | 0 (0)                        | 2 (0.1)  | 0 (0)   | 1 (0)   | 0 (0)       | 0 (0)                  | 1 (0)       | ND                       | ND  |
| ovary                              | 22  | 0 (0)                        | 1 (0)    | 0 (0)   | 0 (0)   | 0 (0)       | 0 (0)                  | 0 (0)       | ND                       | ND  |
| pancreas                           | 17  | 0 (0)                        | 0 (0)    | 0 (0)   | 1 (0.1) | 0 (0)       | 0 (0)                  | 0 (0)       | ND                       | ND  |
| placenta                           | 2   | 0 (0)                        | 0 (0)    | 0 (0)   | 0 (0)   | 0 (0)       | 0 (0)                  | 0 (0)       | ND                       | ND  |
| pleura                             | 5   | 0 (0)                        | 0 (0)    | 1 (0.2) | 0 (0)   | 0 (0)       | 0 (0)                  | 0 (0)       | ND                       | ND  |
| prostate                           | 5   | 0 (0)                        | 1 (0.2)  | 0 (0)   | 0 (0)   | 0 (0)       | 0 (0)                  | 0 (0)       | ND                       | ND  |
| skin                               | 51  | 0 (0)                        | 3 (0.1)  | 0 (0)   | 2 (0)   | 1 (0)       | 0 (0)                  | 5 (0.1)     | ND                       | ND  |
| small_intestine                    | 1   | 0 (0)                        | 0 (0)    | 0 (0)   | 0 (0)   | 0 (0)       | 0 (0)                  | 0 (0)       | ND                       | ND  |
| soft_tissue                        | 19  | 0 (0)                        | 3 (0.2)  | 0 (0)   | 1 (0.1) | 0 (0)       | 0 (0)                  | 0 (0)       | ND                       | ND  |
| stomach                            | 21  | 0 (0)                        | 2 (0.1)  | 1 (0)   | 0 (0)   | 1 (0)       | 0 (0)                  | 3 (0.1)     | ND                       | ND  |
| testis                             | 3   | 2 (0.7)                      | 0 (0)    | 0 (0)   | 0 (0)   | 0 (0)       | 0 (0)                  | 2 (0.7)     | ND                       | ND  |
| thyroid                            | 11  | 0 (0)                        | 1 (0.1)  | 0 (0)   | 0 (0)   | 0 (0)       | 0 (0)                  | 2 (0.2)     | ND                       | ND  |
| not_specified                      | 1   | 0 (0)                        | 0 (0)    | 0 (0)   | 0 (0)   | 0 (0)       | 0 (0)                  | 0 (0)       | ND                       | ND  |
| upper_aerodigestive_tract          | 20  | 0 (0)                        | 2 (0.1)  | 1 (0.1) | 0 (0)   | 1 (0.1)     | 0 (0)                  | 2 (0.1)     | ND                       | ND  |
| urinary_tract                      | 16  | 1 (0.1)                      | 1 (0.1)  | 0 (0)   | 0 (0)   | 0 (0)       | 0 (0)                  | 2 (0.1)     | ND                       | ND  |
| vulva                              | 3   | 0 (0)                        | 0 (0)    | 0 (0)   | 0 (0)   | 0 (0)       | 0 (0)                  | 0 (0)       | ND                       | ND  |

IMMP2L (FRA)

| Cancer Cell lines                  |     | Somatic hemizygous deletions |         |         |         | Somatic HDs | Somatic Amplifications | Breakpoints | Known Cancer Gene Screen |     |
|------------------------------------|-----|------------------------------|---------|---------|---------|-------------|------------------------|-------------|--------------------------|-----|
| Tissue                             | Nº  | <1Mb                         | >1Mb    | Arm     | Chr     |             |                        |             | Point Mutations          | HDs |
| adrenal_gland                      | 2   | 0 (0)                        | 0 (0)   | 0 (0)   | 0 (0)   | 0 (0)       | 0 (0)                  | 1 (0.5)     | ND                       | ND  |
| autonomic_ganglia                  | 36  | 1 (0)                        | 1 (0)   | 0 (0)   | 0 (0)   | 0 (0)       | 0 (0)                  | 1 (0)       | ND                       | ND  |
| biliary_tract                      | 6   | 1 (0.2)                      | 0 (0)   | 0 (0)   | 0 (0)   | 0 (0)       | 0 (0)                  | 1 (0.2)     | ND                       | ND  |
| bone                               | 32  | 0 (0)                        | 0 (0)   | 0 (0)   | 0 (0)   | 0 (0)       | 0 (0)                  | 2 (0.1)     | ND                       | ND  |
| breast                             | 42  | 2 (0)                        | 6 (0.1) | 0 (0)   | 0 (0)   | 0 (0)       | 0 (0)                  | 2 (0)       | ND                       | ND  |
| central_nervous_system             | 55  | 2 (0)                        | 2 (0)   | 0 (0)   | 3 (0.1) | 0 (0)       | 0 (0)                  | 4 (0.1)     | ND                       | ND  |
| cervix                             | 11  | 0 (0)                        | 0 (0)   | 1 (0.1) | 0 (0)   | 0 (0)       | 0 (0)                  | 1 (0.1)     | ND                       | ND  |
| endometrium                        | 9   | 0 (0)                        | 2 (0.2) | 0 (0)   | 0 (0)   | 0 (0)       | 0 (0)                  | 0 (0)       | ND                       | ND  |
| eye                                | 1   | 0 (0)                        | 0 (0)   | 0 (0)   | 0 (0)   | 0 (0)       | 0 (0)                  | 0 (0)       | ND                       | ND  |
| gastrointestinal_tract             | 1   | 0 (0)                        | 0 (0)   | 0 (0)   | 0 (0)   | 0 (0)       | 0 (0)                  | 0 (0)       | ND                       | ND  |
| haematopoietic_and_lymphoid_tissue | 124 | 4 (0)                        | 7 (0.1) | 0 (0)   | 1 (0)   | 3 (0)       | 0 (0)                  | 14 (0.1)    | ND                       | ND  |
| kidney                             | 20  | 1 (0.1)                      | 0 (0)   | 0 (0)   | 0 (0)   | 0 (0)       | 0 (0)                  | 2 (0.1)     | ND                       | ND  |
| large_intestine                    | 36  | 6 (0.2)                      | 0 (0)   | 0 (0)   | 0 (0)   | 1 (0)       | 0 (0)                  | 14 (0.4)    | ND                       | ND  |
| liver                              | 8   | 0 (0)                        | 0 (0)   | 0 (0)   | 0 (0)   | 0 (0)       | 0 (0)                  | 0 (0)       | ND                       | ND  |
| lung                               | 145 | 2 (0)                        | 9 (0.1) | 0 (0)   | 4 (0)   | 0 (0)       | 1 (0)                  | 12 (0.1)    | ND                       | ND  |
| oesophagus                         | 21  | 3 (0.1)                      | 2 (0.1) | 1 (0)   | 1 (0)   | 1 (0)       | 0 (0)                  | 7 (0.3)     | ND                       | ND  |
| ovary                              | 22  | 0 (0)                        | 4 (0.2) | 0 (0)   | 0 (0)   | 1 (0)       | 0 (0)                  | 3 (0.1)     | ND                       | ND  |
| pancreas                           | 17  | 0 (0)                        | 1 (0.1) | 0 (0)   | 0 (0)   | 2 (0.1)     | 0 (0)                  | 3 (0.2)     | ND                       | ND  |
| placenta                           | 2   | 0 (0)                        | 0 (0)   | 0 (0)   | 0 (0)   | 0 (0)       | 0 (0)                  | 0 (0)       | ND                       | ND  |
| pleura                             | 5   | 0 (0)                        | 0 (0)   | 0 (0)   | 1 (0.2) | 0 (0)       | 0 (0)                  | 0 (0)       | ND                       | ND  |
| prostate                           | 5   | 0 (0)                        | 0 (0)   | 0 (0)   | 0 (0)   | 0 (0)       | 0 (0)                  | 0 (0)       | ND                       | ND  |
| skin                               | 51  | 1 (0)                        | 6 (0.1) | 0 (0)   | 0 (0)   | 0 (0)       | 0 (0)                  | 3 (0.1)     | ND                       | ND  |
| small_intestine                    | 1   | 0 (0)                        | 0 (0)   | 0 (0)   | 0 (0)   | 0 (0)       | 0 (0)                  | 0 (0)       | ND                       | ND  |
| soft_tissue                        | 19  | 0 (0)                        | 1 (0.1) | 0 (0)   | 1 (0.1) | 0 (0)       | 0 (0)                  | 0 (0)       | ND                       | ND  |
| stomach                            | 21  | 6 (0.3)                      | 2 (0.1) | 0 (0)   | 0 (0)   | 2 (0.1)     | 0 (0)                  | 7 (0.3)     | ND                       | ND  |
| testis                             | 3   | 0 (0)                        | 0 (0)   | 0 (0)   | 0 (0)   | 0 (0)       | 0 (0)                  | 0 (0)       | ND                       | ND  |
| thyroid                            | 11  | 1 (0.1)                      | 2 (0.2) | 0 (0)   | 0 (0)   | 0 (0)       | 0 (0)                  | 2 (0.2)     | ND                       | ND  |
| not_specified                      | 1   | 0 (0)                        | 0 (0)   | 0 (0)   | 0 (0)   | 0 (0)       | 0 (0)                  | 0 (0)       | ND                       | ND  |
| upper_aerodigestive_tract          | 20  | 3 (0.2)                      | 1 (0.1) | 1 (0.1) | 0 (0)   | 1 (0.1)     | 0 (0)                  | 5 (0.3)     | ND                       | ND  |
| urinary_tract                      | 16  | 1 (0.1)                      | 2 (0.1) | 0 (0)   | 0 (0)   | 1 (0.1)     | 0 (0)                  | 3 (0.2)     | ND                       | ND  |
| vulva                              | 3   | 0 (0)                        | 0 (0)   | 0 (0)   | 0 (0)   | 0 (0)       | 0 (0)                  | 0 (0)       | ND                       | ND  |

LARGE (FRA)

| Cancer Cell lines                  |     | Somatic hemizygous deletions |          |          |       | Somatic HDs | Somatic Amplifications | Breakpoints | Known Cancer Gene Screen |     |
|------------------------------------|-----|------------------------------|----------|----------|-------|-------------|------------------------|-------------|--------------------------|-----|
| Tissue                             | Nº  | <1Mb                         | >1Mb     | Arm      | Chr   |             |                        |             | Point Mutations          | HDs |
| adrenal_gland                      | 2   | 0 (0)                        | 1 (0.5)  | 1 (0.5)  | 0 (0) | 0 (0)       | 0 (0)                  | 0 (0)       | ND                       | ND  |
| autonomic_ganglia                  | 36  | 0 (0)                        | 2 (0.1)  | 0 (0)    | 0 (0) | 0 (0)       | 0 (0)                  | 1 (0)       | ND                       | ND  |
| biliary_tract                      | 6   | 0 (0)                        | 0 (0)    | 2 (0.3)  | 0 (0) | 0 (0)       | 0 (0)                  | 0 (0)       | ND                       | ND  |
| bone                               | 32  | 0 (0)                        | 3 (0.1)  | 0 (0)    | 0 (0) | 0 (0)       | 0 (0)                  | 0 (0)       | ND                       | ND  |
| breast                             | 42  | 0 (0)                        | 5 (0.1)  | 11 (0.3) | 0 (0) | 0 (0)       | 0 (0)                  | 2 (0)       | ND                       | ND  |
| central_nervous_system             | 55  | 0 (0)                        | 6 (0.1)  | 11 (0.2) | 0 (0) | 0 (0)       | 0 (0)                  | 1 (0)       | ND                       | ND  |
| cervix                             | 11  | 0 (0)                        | 0 (0)    | 1 (0.1)  | 0 (0) | 0 (0)       | 0 (0)                  | 0 (0)       | ND                       | ND  |
| endometrium                        | 9   | 0 (0)                        | 0 (0)    | 1 (0.1)  | 0 (0) | 0 (0)       | 0 (0)                  | 0 (0)       | ND                       | ND  |
| eye                                | 1   | 0 (0)                        | 0 (0)    | 0 (0)    | 0 (0) | 0 (0)       | 0 (0)                  | 0 (0)       | ND                       | ND  |
| gastrointestinal_tract             | 1   | 0 (0)                        | 1 (1)    | 0 (0)    | 0 (0) | 0 (0)       | 0 (0)                  | 0 (0)       | ND                       | ND  |
| haematopoietic_and_lymphoid_tissue | 124 | 0 (0)                        | 4 (0)    | 7 (0.1)  | 0 (0) | 0 (0)       | 0 (0)                  | 2 (0)       | ND                       | ND  |
| kidney                             | 20  | 1 (0.1)                      | 3 (0.2)  | 4 (0.2)  | 0 (0) | 0 (0)       | 0 (0)                  | 1 (0.1)     | ND                       | ND  |
| large_intestine                    | 36  | 0 (0)                        | 4 (0.1)  | 9 (0.3)  | 0 (0) | 0 (0)       | 0 (0)                  | 0 (0)       | ND                       | ND  |
| liver                              | 8   | 0 (0)                        | 1 (0.1)  | 3 (0.4)  | 0 (0) | 0 (0)       | 0 (0)                  | 0 (0)       | ND                       | ND  |
| lung                               | 145 | 2 (0)                        | 24 (0.2) | 44 (0.3) | 0 (0) | 1 (0)       | 0 (0)                  | 11 (0.1)    | ND                       | ND  |
| oesophagus                         | 21  | 0 (0)                        | 5 (0.2)  | 4 (0.2)  | 0 (0) | 0 (0)       | 0 (0)                  | 1 (0)       | ND                       | ND  |
| ovary                              | 22  | 1 (0)                        | 2 (0.1)  | 5 (0.2)  | 0 (0) | 0 (0)       | 0 (0)                  | 2 (0.1)     | ND                       | ND  |
| pancreas                           | 17  | 0 (0)                        | 7 (0.4)  | 3 (0.2)  | 0 (0) | 0 (0)       | 0 (0)                  | 0 (0)       | ND                       | ND  |
| placenta                           | 2   | 1 (0.5)                      | 0 (0)    | 0 (0)    | 0 (0) | 0 (0)       | 0 (0)                  | 1 (0.5)     | ND                       | ND  |
| pleura                             | 5   | 0 (0)                        | 1 (0.2)  | 2 (0.4)  | 0 (0) | 0 (0)       | 0 (0)                  | 0 (0)       | ND                       | ND  |
| prostate                           | 5   | 0 (0)                        | 1 (0.2)  | 0 (0)    | 0 (0) | 0 (0)       | 0 (0)                  | 0 (0)       | ND                       | ND  |
| skin                               | 51  | 1 (0)                        | 6 (0.1)  | 2 (0)    | 0 (0) | 0 (0)       | 0 (0)                  | 4 (0.1)     | ND                       | ND  |
| small_intestine                    | 1   | 0 (0)                        | 0 (0)    | 0 (0)    | 0 (0) | 0 (0)       | 0 (0)                  | 0 (0)       | ND                       | ND  |
| soft_tissue                        | 19  | 0 (0)                        | 0 (0)    | 5 (0.3)  | 0 (0) | 0 (0)       | 0 (0)                  | 0 (0)       | ND                       | ND  |
| stomach                            | 21  | 1 (0)                        | 2 (0.1)  | 4 (0.2)  | 0 (0) | 0 (0)       | 0 (0)                  | 1 (0)       | ND                       | ND  |
| testis                             | 3   | 0 (0)                        | 1 (0.3)  | 1 (0.3)  | 0 (0) | 0 (0)       | 0 (0)                  | 0 (0)       | ND                       | ND  |
| thyroid                            | 11  | 0 (0)                        | 0 (0)    | 5 (0.5)  | 0 (0) | 0 (0)       | 0 (0)                  | 1 (0.1)     | ND                       | ND  |
| not_specified                      | 1   | 0 (0)                        | 0 (0)    | 0 (0)    | 0 (0) | 0 (0)       | 0 (0)                  | 0 (0)       | ND                       | ND  |
| upper_aerodigestive_tract          | 20  | 0 (0)                        | 1 (0.1)  | 2 (0.1)  | 0 (0) | 0 (0)       | 0 (0)                  | 0 (0)       | ND                       | ND  |
| urinary_tract                      | 16  | 0 (0)                        | 3 (0.2)  | 4 (0.3)  | 0 (0) | 0 (0)       | 0 (0)                  | 0 (0)       | ND                       | ND  |
| vulva                              | 3   | 0 (0)                        | 0 (0)    | 0 (0)    | 0 (0) | 0 (0)       | 0 (0)                  | 0 (0)       | ND                       | ND  |

LRP1B (FRA)

| Cancer Cell lines                  |     | Somatic hemizygous deletions |          |         |         | Somatic HDs | Somatic Amplifications | Breakpoints | Known Cancer Gene Screen |     |
|------------------------------------|-----|------------------------------|----------|---------|---------|-------------|------------------------|-------------|--------------------------|-----|
| Tissue                             | Nº  | <1Mb                         | >1Mb     | Arm     | Chr     |             |                        |             | Point Mutations          | HDs |
| adrenal_gland                      | 2   | 0 (0)                        | 0 (0)    | 0 (0)   | 0 (0)   | 0 (0)       | 0 (0)                  | 0 (0)       | ND                       | ND  |
| autonomic_ganglia                  | 36  | 1 (0)                        | 0 (0)    | 0 (0)   | 0 (0)   | 0 (0)       | 0 (0)                  | 4 (0.1)     | ND                       | ND  |
| biliary_tract                      | 6   | 1 (0.2)                      | 0 (0)    | 1 (0.2) | 0 (0)   | 1 (0.2)     | 0 (0)                  | 4 (0.7)     | ND                       | ND  |
| bone                               | 32  | 3 (0.1)                      | 3 (0.1)  | 0 (0)   | 0 (0)   | 3 (0.1)     | 0 (0)                  | 5 (0.2)     | ND                       | ND  |
| breast                             | 42  | 3 (0.1)                      | 6 (0.1)  | 1 (0)   | 0 (0)   | 0 (0)       | 0 (0)                  | 8 (0.2)     | ND                       | ND  |
| central_nervous_system             | 55  | 11 (0.2)                     | 1 (0)    | 1 (0)   | 0 (0)   | 4 (0.1)     | 0 (0)                  | 17 (0.3)    | ND                       | ND  |
| cervix                             | 11  | 0 (0)                        | 1 (0.1)  | 2 (0.2) | 0 (0)   | 0 (0)       | 0 (0)                  | 1 (0.1)     | ND                       | ND  |
| endometrium                        | 9   | 3 (0.3)                      | 0 (0)    | 0 (0)   | 0 (0)   | 0 (0)       | 0 (0)                  | 3 (0.3)     | ND                       | ND  |
| eye                                | 1   | 0 (0)                        | 0 (0)    | 0 (0)   | 0 (0)   | 0 (0)       | 0 (0)                  | 0 (0)       | ND                       | ND  |
| gastrointestinal_tract             | 1   | 0 (0)                        | 0 (0)    | 0 (0)   | 0 (0)   | 0 (0)       | 0 (0)                  | 0 (0)       | ND                       | ND  |
| haematopoietic_and_lymphoid_tissue | 124 | 1 (0)                        | 2 (0)    | 1 (0)   | 1 (0)   | 0 (0)       | 0 (0)                  | 2 (0)       | ND                       | ND  |
| kidney                             | 20  | 0 (0)                        | 0 (0)    | 0 (0)   | 1 (0.1) | 2 (0.1)     | 0 (0)                  | 3 (0.2)     | ND                       | ND  |
| large_intestine                    | 36  | 3 (0.1)                      | 0 (0)    | 0 (0)   | 1 (0)   | 0 (0)       | 0 (0)                  | 4 (0.1)     | ND                       | ND  |
| liver                              | 8   | 2 (0.3)                      | 0 (0)    | 0 (0)   | 0 (0)   | 0 (0)       | 0 (0)                  | 3 (0.4)     | ND                       | ND  |
| lung                               | 145 | 10 (0.1)                     | 14 (0.1) | 1 (0)   | 2 (0)   | 13 (0.1)    | 0 (0)                  | 28 (0.2)    | ND                       | ND  |
| oesophagus                         | 21  | 4 (0.2)                      | 1 (0)    | 1 (0)   | 0 (0)   | 5 (0.2)     | 0 (0)                  | 11 (0.5)    | ND                       | ND  |
| ovary                              | 22  | 0 (0)                        | 1 (0)    | 1 (0)   | 0 (0)   | 4 (0.2)     | 0 (0)                  | 7 (0.3)     | ND                       | ND  |
| pancreas                           | 17  | 2 (0.1)                      | 3 (0.2)  | 0 (0)   | 0 (0)   | 0 (0)       | 0 (0)                  | 5 (0.3)     | ND                       | ND  |
| placenta                           | 2   | 0 (0)                        | 0 (0)    | 0 (0)   | 0 (0)   | 0 (0)       | 0 (0)                  | 0 (0)       | ND                       | ND  |
| pleura                             | 5   | 0 (0)                        | 1 (0.2)  | 0 (0)   | 0 (0)   | 0 (0)       | 0 (0)                  | 1 (0.2)     | ND                       | ND  |
| prostate                           | 5   | 0 (0)                        | 1 (0.2)  | 0 (0)   | 0 (0)   | 0 (0)       | 0 (0)                  | 0 (0)       | ND                       | ND  |
| skin                               | 51  | 4 (0.1)                      | 4 (0.1)  | 0 (0)   | 0 (0)   | 0 (0)       | 0 (0)                  | 7 (0.1)     | ND                       | ND  |
| small_intestine                    | 1   | 0 (0)                        | 0 (0)    | 0 (0)   | 0 (0)   | 0 (0)       | 0 (0)                  | 0 (0)       | ND                       | ND  |
| soft_tissue                        | 19  | 1 (0.1)                      | 0 (0)    | 0 (0)   | 0 (0)   | 1 (0.1)     | 0 (0)                  | 2 (0.1)     | ND                       | ND  |
| stomach                            | 21  | 2 (0.1)                      | 2 (0.1)  | 1 (0)   | 0 (0)   | 1 (0)       | 0 (0)                  | 6 (0.3)     | ND                       | ND  |
| testis                             | 3   | 0 (0)                        | 0 (0)    | 0 (0)   | 0 (0)   | 1 (0.3)     | 0 (0)                  | 2 (0.7)     | ND                       | ND  |
| thyroid                            | 11  | 0 (0)                        | 1 (0.1)  | 0 (0)   | 0 (0)   | 0 (0)       | 0 (0)                  | 1 (0.1)     | ND                       | ND  |
| not_specified                      | 1   | 0 (0)                        | 0 (0)    | 0 (0)   | 0 (0)   | 0 (0)       | 0 (0)                  | 0 (0)       | ND                       | ND  |
| upper_aerodigestive_tract          | 20  | 4 (0.2)                      | 0 (0)    | 2 (0.1) | 0 (0)   | 1 (0.1)     | 0 (0)                  | 5 (0.3)     | ND                       | ND  |
| urinary_tract                      | 16  | 3 (0.2)                      | 2 (0.1)  | 0 (0)   | 0 (0)   | 1 (0.1)     | 0 (0)                  | 4 (0.3)     | ND                       | ND  |
| vulva                              | 3   | 0 (0)                        | 1 (0.3)  | 0 (0)   | 0 (0)   | 0 (0)       | 0 (0)                  | 0 (0)       | ND                       | ND  |

NBEA (FRA)

| Cancer Cell lines                  |     | Somatic hemizygous deletions |          |          |       | Somatic HDs | Somatic Amplifications | Breakpoints | Known Cancer Gene Screen |     |
|------------------------------------|-----|------------------------------|----------|----------|-------|-------------|------------------------|-------------|--------------------------|-----|
| Tissue                             | Nº  | <1Mb                         | >1Mb     | Arm      | Chr   |             |                        |             | Point Mutations          | HDs |
| adrenal_gland                      | 2   | 0 (0)                        | 0 (0)    | 0 (0)    | 0 (0) | 0 (0)       | 0 (0)                  | 0 (0)       | ND                       | ND  |
| autonomic_ganglia                  | 36  | 0 (0)                        | 1 (0)    | 3 (0.1)  | 0 (0) | 0 (0)       | 0 (0)                  | 0 (0)       | ND                       | ND  |
| biliary_tract                      | 6   | 0 (0)                        | 1 (0.2)  | 0 (0)    | 0 (0) | 0 (0)       | 0 (0)                  | 0 (0)       | ND                       | ND  |
| bone                               | 32  | 0 (0)                        | 2 (0.1)  | 5 (0.2)  | 0 (0) | 0 (0)       | 0 (0)                  | 1 (0)       | ND                       | ND  |
| breast                             | 42  | 0 (0)                        | 6 (0.1)  | 11 (0.3) | 0 (0) | 0 (0)       | 0 (0)                  | 0 (0)       | ND                       | ND  |
| central_nervous_system             | 55  | 0 (0)                        | 7 (0.1)  | 13 (0.2) | 0 (0) | 0 (0)       | 0 (0)                  | 0 (0)       | ND                       | ND  |
| cervix                             | 11  | 0 (0)                        | 0 (0)    | 3 (0.3)  | 0 (0) | 0 (0)       | 0 (0)                  | 0 (0)       | ND                       | ND  |
| endometrium                        | 9   | 0 (0)                        | 0 (0)    | 1 (0.1)  | 0 (0) | 0 (0)       | 0 (0)                  | 0 (0)       | ND                       | ND  |
| eye                                | 1   | 0 (0)                        | 0 (0)    | 0 (0)    | 0 (0) | 0 (0)       | 0 (0)                  | 0 (0)       | ND                       | ND  |
| gastrointestinal_tract             | 1   | 0 (0)                        | 0 (0)    | 1 (1)    | 0 (0) | 0 (0)       | 0 (0)                  | 0 (0)       | ND                       | ND  |
| haematopoietic_and_lymphoid_tissue | 124 | 0 (0)                        | 5 (0)    | 7 (0.1)  | 0 (0) | 0 (0)       | 0 (0)                  | 0 (0)       | ND                       | ND  |
| kidney                             | 20  | 0 (0)                        | 0 (0)    | 4 (0.2)  | 0 (0) | 0 (0)       | 0 (0)                  | 0 (0)       | ND                       | ND  |
| large_intestine                    | 36  | 0 (0)                        | 2 (0.1)  | 4 (0.1)  | 0 (0) | 0 (0)       | 1 (0)                  | 1 (0)       | ND                       | ND  |
| liver                              | 8   | 0 (0)                        | 2 (0.3)  | 1 (0.1)  | 0 (0) | 0 (0)       | 0 (0)                  | 1 (0.1)     | ND                       | ND  |
| lung                               | 145 | 0 (0)                        | 34 (0.2) | 49 (0.3) | 0 (0) | 0 (0)       | 0 (0)                  | 3 (0)       | ND                       | ND  |
| oesophagus                         | 21  | 0 (0)                        | 3 (0.1)  | 6 (0.3)  | 0 (0) | 0 (0)       | 0 (0)                  | 0 (0)       | ND                       | ND  |
| ovary                              | 22  | 0 (0)                        | 1 (0)    | 6 (0.3)  | 0 (0) | 0 (0)       | 0 (0)                  | 0 (0)       | ND                       | ND  |
| pancreas                           | 17  | 0 (0)                        | 1 (0.1)  | 4 (0.2)  | 0 (0) | 0 (0)       | 0 (0)                  | 0 (0)       | ND                       | ND  |
| placenta                           | 2   | 0 (0)                        | 0 (0)    | 1 (0.5)  | 0 (0) | 0 (0)       | 0 (0)                  | 0 (0)       | ND                       | ND  |
| pleura                             | 5   | 0 (0)                        | 1 (0.2)  | 0 (0)    | 0 (0) | 0 (0)       | 0 (0)                  | 0 (0)       | ND                       | ND  |
| prostate                           | 5   | 0 (0)                        | 0 (0)    | 0 (0)    | 0 (0) | 0 (0)       | 0 (0)                  | 0 (0)       | ND                       | ND  |
| skin                               | 51  | 0 (0)                        | 1 (0)    | 1 (0)    | 0 (0) | 0 (0)       | 0 (0)                  | 0 (0)       | ND                       | ND  |
| small_intestine                    | 1   | 0 (0)                        | 0 (0)    | 0 (0)    | 0 (0) | 0 (0)       | 0 (0)                  | 0 (0)       | ND                       | ND  |
| soft_tissue                        | 19  | 0 (0)                        | 2 (0.1)  | 4 (0.2)  | 0 (0) | 0 (0)       | 0 (0)                  | 0 (0)       | ND                       | ND  |
| stomach                            | 21  | 0 (0)                        | 1 (0)    | 3 (0.1)  | 0 (0) | 0 (0)       | 0 (0)                  | 0 (0)       | ND                       | ND  |
| testis                             | 3   | 0 (0)                        | 0 (0)    | 2 (0.7)  | 0 (0) | 0 (0)       | 0 (0)                  | 0 (0)       | ND                       | ND  |
| thyroid                            | 11  | 0 (0)                        | 1 (0.1)  | 5 (0.5)  | 0 (0) | 0 (0)       | 0 (0)                  | 1 (0.1)     | ND                       | ND  |
| not_specified                      | 1   | 0 (0)                        | 0 (0)    | 0 (0)    | 0 (0) | 0 (0)       | 0 (0)                  | 0 (0)       | ND                       | ND  |
| upper_aerodigestive_tract          | 20  | 0 (0)                        | 2 (0.1)  | 4 (0.2)  | 0 (0) | 0 (0)       | 0 (0)                  | 0 (0)       | ND                       | ND  |
| urinary_tract                      | 16  | 0 (0)                        | 5 (0.3)  | 1 (0.1)  | 0 (0) | 0 (0)       | 0 (0)                  | 1 (0.1)     | ND                       | ND  |
| vulva                              | 3   | 0 (0)                        | 0 (0)    | 0 (0)    | 0 (0) | 0 (0)       | 0 (0)                  | 0 (0)       | ND                       | ND  |

PARK2 (FRA)

| Cancer Cell lines                  |     | Somatic hemizygous deletions |          |         |         | Somatic HDs | Somatic Amplifications | Breakpoints | Known Cancer Gene Screen |     |
|------------------------------------|-----|------------------------------|----------|---------|---------|-------------|------------------------|-------------|--------------------------|-----|
| Tissue                             | Nº  | <1Mb                         | >1Mb     | Arm     | Chr     |             |                        |             | Point Mutations          | HDs |
| adrenal_gland                      | 2   | 0 (0)                        | 0 (0)    | 0 (0)   | 1 (0.5) | 0 (0)       | 0 (0)                  | 0 (0)       | ND                       | ND  |
| autonomic_ganglia                  | 36  | 3 (0.1)                      | 9 (0.3)  | 0 (0)   | 0 (0)   | 1 (0)       | 0 (0)                  | 7 (0.2)     | ND                       | ND  |
| biliary_tract                      | 6   | 0 (0)                        | 3 (0.5)  | 2 (0.3) | 0 (0)   | 0 (0)       | 0 (0)                  | 1 (0.2)     | ND                       | ND  |
| bone                               | 32  | 0 (0)                        | 1 (0)    | 0 (0)   | 0 (0)   | 0 (0)       | 0 (0)                  | 2 (0.1)     | ND                       | ND  |
| breast                             | 42  | 0 (0)                        | 12 (0.3) | 2 (0)   | 0 (0)   | 0 (0)       | 0 (0)                  | 1 (0)       | ND                       | ND  |
| central_nervous_system             | 55  | 3 (0.1)                      | 11 (0.2) | 2 (0)   | 1 (0)   | 0 (0)       | 0 (0)                  | 9 (0.2)     | ND                       | ND  |
| cervix                             | 11  | 0 (0)                        | 3 (0.3)  | 0 (0)   | 0 (0)   | 0 (0)       | 0 (0)                  | 0 (0)       | ND                       | ND  |
| endometrium                        | 9   | 0 (0)                        | 2 (0.2)  | 0 (0)   | 0 (0)   | 0 (0)       | 0 (0)                  | 2 (0.2)     | ND                       | ND  |
| eye                                | 1   | 0 (0)                        | 0 (0)    | 0 (0)   | 0 (0)   | 0 (0)       | 0 (0)                  | 0 (0)       | ND                       | ND  |
| gastrointestinal_tract             | 1   | 0 (0)                        | 0 (0)    | 1 (1)   | 0 (0)   | 0 (0)       | 0 (0)                  | 0 (0)       | ND                       | ND  |
| haematopoietic_and_lymphoid_tissue | 124 | 8 (0.1)                      | 10 (0.1) | 0 (0)   | 0 (0)   | 0 (0)       | 0 (0)                  | 10 (0.1)    | ND                       | ND  |
| kidney                             | 20  | 0 (0)                        | 5 (0.3)  | 1 (0.1) | 1 (0.1) | 0 (0)       | 0 (0)                  | 1 (0.1)     | ND                       | ND  |
| large_intestine                    | 36  | 3 (0.1)                      | 3 (0.1)  | 0 (0)   | 1 (0)   | 7 (0.2)     | 0 (0)                  | 10 (0.3)    | ND                       | ND  |
| liver                              | 8   | 0 (0)                        | 3 (0.4)  | 0 (0)   | 0 (0)   | 2 (0.3)     | 0 (0)                  | 1 (0.1)     | ND                       | ND  |
| lung                               | 145 | 4 (0)                        | 24 (0.2) | 1 (0)   | 4 (0)   | 8 (0.1)     | 0 (0)                  | 22 (0.2)    | ND                       | ND  |
| oesophagus                         | 21  | 2 (0.1)                      | 7 (0.3)  | 0 (0)   | 1 (0)   | 1 (0)       | 0 (0)                  | 4 (0.2)     | ND                       | ND  |
| ovary                              | 22  | 0 (0)                        | 8 (0.4)  | 0 (0)   | 0 (0)   | 0 (0)       | 0 (0)                  | 1 (0)       | ND                       | ND  |
| pancreas                           | 17  | 0 (0)                        | 3 (0.2)  | 0 (0)   | 0 (0)   | 1 (0.1)     | 0 (0)                  | 1 (0.1)     | ND                       | ND  |
| placenta                           | 2   | 0 (0)                        | 0 (0)    | 0 (0)   | 0 (0)   | 0 (0)       | 0 (0)                  | 0 (0)       | ND                       | ND  |
| pleura                             | 5   | 1 (0.2)                      | 1 (0.2)  | 0 (0)   | 0 (0)   | 0 (0)       | 0 (0)                  | 1 (0.2)     | ND                       | ND  |
| prostate                           | 5   | 0 (0)                        | 0 (0)    | 0 (0)   | 0 (0)   | 0 (0)       | 0 (0)                  | 1 (0.2)     | ND                       | ND  |
| skin                               | 51  | 2 (0)                        | 9 (0.2)  | 3 (0.1) | 1 (0)   | 1 (0)       | 0 (0)                  | 5 (0.1)     | ND                       | ND  |
| small_intestine                    | 1   | 0 (0)                        | 0 (0)    | 0 (0)   | 0 (0)   | 0 (0)       | 0 (0)                  | 0 (0)       | ND                       | ND  |
| soft_tissue                        | 19  | 3 (0.2)                      | 1 (0.1)  | 0 (0)   | 0 (0)   | 0 (0)       | 0 (0)                  | 3 (0.2)     | ND                       | ND  |
| stomach                            | 21  | 2 (0.1)                      | 3 (0.1)  | 0 (0)   | 0 (0)   | 3 (0.1)     | 0 (0)                  | 4 (0.2)     | ND                       | ND  |
| testis                             | 3   | 0 (0)                        | 0 (0)    | 1 (0.3) | 0 (0)   | 1 (0.3)     | 0 (0)                  | 2 (0.7)     | ND                       | ND  |
| thyroid                            | 11  | 0 (0)                        | 1 (0.1)  | 0 (0)   | 2 (0.2) | 0 (0)       | 0 (0)                  | 0 (0)       | ND                       | ND  |
| not_specified                      | 1   | 0 (0)                        | 0 (0)    | 0 (0)   | 0 (0)   | 0 (0)       | 0 (0)                  | 0 (0)       | ND                       | ND  |
| upper_aerodigestive_tract          | 20  | 0 (0)                        | 2 (0.1)  | 1 (0.1) | 2 (0.1) | 0 (0)       | 0 (0)                  | 2 (0.1)     | ND                       | ND  |
| urinary_tract                      | 16  | 0 (0)                        | 2 (0.1)  | 0 (0)   | 0 (0)   | 0 (0)       | 0 (0)                  | 1 (0.1)     | ND                       | ND  |
| vulva                              | 3   | 0 (0)                        | 0 (0)    | 0 (0)   | 0 (0)   | 0 (0)       | 0 (0)                  | 0 (0)       | ND                       | ND  |

## PDE4D (FRA)

| Cancer Cell lines                  |     | Somatic hemizygous deletions |          |          |         | Somatic HDs | Somatic Amplifications | Breakpoints | Known Cancer Gene Screen |     |
|------------------------------------|-----|------------------------------|----------|----------|---------|-------------|------------------------|-------------|--------------------------|-----|
| Tissue                             | No  | <1Mb                         | >1Mb     | Arm      | Chr     |             |                        |             | Point Mutations          | HDs |
| adrenal_gland                      | 2   | 0 (0)                        | 0 (0)    | 0 (0)    | 0 (0)   | 0 (0)       | 0 (0)                  | 0 (0)       | ND                       | ND  |
| autonomic_ganglia                  | 36  | 1 (0)                        | 1 (0)    | 1 (0)    | 1 (0)   | 0 (0)       | 0 (0)                  | 1 (0)       | ND                       | ND  |
| biliary_tract                      | 6   | 0 (0)                        | 0 (0)    | 3 (0.5)  | 0 (0)   | 0 (0)       | 0 (0)                  | 0 (0)       | ND                       | ND  |
| bone                               | 32  | 1 (0)                        | 1 (0)    | 0 (0)    | 1 (0)   | 0 (0)       | 0 (0)                  | 1 (0)       | ND                       | ND  |
| breast                             | 42  | 3 (0.1)                      | 6 (0.1)  | 3 (0.1)  | 0 (0)   | 1 (0)       | 0 (0)                  | 4 (0.1)     | ND                       | ND  |
| central_nervous_system             | 55  | 0 (0)                        | 3 (0.1)  | 0 (0)    | 0 (0)   | 0 (0)       | 0 (0)                  | 1 (0)       | ND                       | ND  |
| cervix                             | 11  | 1 (0.1)                      | 0 (0)    | 2 (0.2)  | 0 (0)   | 0 (0)       | 0 (0)                  | 2 (0.2)     | ND                       | ND  |
| endometrium                        | 9   | 0 (0)                        | 1 (0.1)  | 0 (0)    | 0 (0)   | 0 (0)       | 0 (0)                  | 1 (0.1)     | ND                       | ND  |
| eye                                | 1   | 0 (0)                        | 0 (0)    | 0 (0)    | 0 (0)   | 0 (0)       | 0 (0)                  | 0 (0)       | ND                       | ND  |
| gastrointestinal_tract             | 1   | 0 (0)                        | 0 (0)    | 1 (1)    | 0 (0)   | 0 (0)       | 0 (0)                  | 0 (0)       | ND                       | ND  |
| haematopoietic_and_lymphoid_tissue | 124 | 3 (0)                        | 7 (0.1)  | 0 (0)    | 0 (0)   | 0 (0)       | 0 (0)                  | 1 (0)       | ND                       | ND  |
| kidney                             | 20  | 0 (0)                        | 6 (0.3)  | 0 (0)    | 1 (0.1) | 0 (0)       | 0 (0)                  | 2 (0.1)     | ND                       | ND  |
| large_intestine                    | 36  | 2 (0.1)                      | 4 (0.1)  | 0 (0)    | 2 (0.1) | 0 (0)       | 0 (0)                  | 2 (0.1)     | ND                       | ND  |
| liver                              | 8   | 0 (0)                        | 1 (0.1)  | 0 (0)    | 0 (0)   | 1 (0.1)     | 0 (0)                  | 0 (0)       | ND                       | ND  |
| lung                               | 145 | 5 (0)                        | 21 (0.1) | 29 (0.2) | 1 (0)   | 2 (0)       | 0 (0)                  | 19 (0.1)    | ND                       | ND  |
| oesophagus                         | 21  | 3 (0.1)                      | 5 (0.2)  | 2 (0.1)  | 0 (0)   | 0 (0)       | 0 (0)                  | 0 (0)       | ND                       | ND  |
| ovary                              | 22  | 2 (0.1)                      | 4 (0.2)  | 1 (0)    | 1 (0)   | 1 (0)       | 0 (0)                  | 3 (0.1)     | ND                       | ND  |
| pancreas                           | 17  | 0 (0)                        | 1 (0.1)  | 0 (0)    | 1 (0.1) | 0 (0)       | 0 (0)                  | 1 (0.1)     | ND                       | ND  |
| placenta                           | 2   | 0 (0)                        | 0 (0)    | 0 (0)    | 0 (0)   | 0 (0)       | 0 (0)                  | 0 (0)       | ND                       | ND  |
| pleura                             | 5   | 0 (0)                        | 0 (0)    | 0 (0)    | 0 (0)   | 0 (0)       | 0 (0)                  | 0 (0)       | ND                       | ND  |
| prostate                           | 5   | 1 (0.2)                      | 0 (0)    | 0 (0)    | 0 (0)   | 0 (0)       | 0 (0)                  | 2 (0.4)     | ND                       | ND  |
| skin                               | 51  | 3 (0.1)                      | 0 (0)    | 5 (0.1)  | 1 (0)   | 1 (0)       | 0 (0)                  | 6 (0.1)     | ND                       | ND  |
| small_intestine                    | 1   | 0 (0)                        | 0 (0)    | 0 (0)    | 0 (0)   | 0 (0)       | 0 (0)                  | 0 (0)       | ND                       | ND  |
| soft_tissue                        | 19  | 1 (0.1)                      | 0 (0)    | 1 (0.1)  | 1 (0.1) | 0 (0)       | 0 (0)                  | 1 (0.1)     | ND                       | ND  |
| stomach                            | 21  | 2 (0.1)                      | 3 (0.1)  | 0 (0)    | 2 (0.1) | 3 (0.1)     | 0 (0)                  | 5 (0.2)     | ND                       | ND  |
| testis                             | 3   | 0 (0)                        | 1 (0.3)  | 0 (0)    | 0 (0)   | 0 (0)       | 0 (0)                  | 0 (0)       | ND                       | ND  |
| thyroid                            | 11  | 0 (0)                        | 1 (0.1)  | 0 (0)    | 1 (0.1) | 0 (0)       | 0 (0)                  | 0 (0)       | ND                       | ND  |
| not specified                      | 1   | 0 (0)                        | 0 (0)    | 0 (0)    | 0 (0)   | 0 (0)       | 0 (0)                  | 0 (0)       | ND                       | ND  |
| upper_aerodigestive_tract          | 20  | 0 (0)                        | 4 (0.2)  | 4 (0.2)  | 0 (0)   | 1 (0.1)     | 0 (0)                  | 3 (0.2)     | ND                       | ND  |
| urinary_tract                      | 16  | 2 (0.1)                      | 2 (0.1)  | 2 (0.1)  | 0 (0)   | 0 (0)       | 0 (0)                  | 1 (0.1)     | ND                       | ND  |
| vulva                              | 3   | 1 (0.3)                      | 0 (0)    | 0 (0)    | 0 (0)   | 0 (0)       | 0 (0)                  | 0 (0)       | ND                       | ND  |

## RORA (FRA)

| Cancer Cell lines                  |     | Somatic hemizygous deletions |          |          |       | Somatic HDs | Somatic Amplifications | Breakpoints | Known Cancer Gene Screen |     |
|------------------------------------|-----|------------------------------|----------|----------|-------|-------------|------------------------|-------------|--------------------------|-----|
| Tissue                             | No  | <1Mb                         | >1Mb     | Arm      | Chr   |             |                        |             | Point Mutations          | HDs |
| adrenal_gland                      | 2   | 0 (0)                        | 0 (0)    | 0 (0)    | 0 (0) | 0 (0)       | 0 (0)                  | 0 (0)       | ND                       | ND  |
| autonomic_ganglia                  | 36  | 0 (0)                        | 0 (0)    | 1 (0)    | 0 (0) | 0 (0)       | 0 (0)                  | 2 (0.1)     | ND                       | ND  |
| biliary_tract                      | 6   | 1 (0.2)                      | 0 (0)    | 0 (0)    | 0 (0) | 0 (0)       | 0 (0)                  | 1 (0.2)     | ND                       | ND  |
| bone                               | 32  | 0 (0)                        | 4 (0.1)  | 0 (0)    | 0 (0) | 0 (0)       | 0 (0)                  | 1 (0)       | ND                       | ND  |
| breast                             | 42  | 0 (0)                        | 5 (0.1)  | 1 (0)    | 0 (0) | 0 (0)       | 0 (0)                  | 1 (0)       | ND                       | ND  |
| central_nervous_system             | 55  | 0 (0)                        | 4 (0.1)  | 2 (0)    | 0 (0) | 0 (0)       | 0 (0)                  | 0 (0)       | ND                       | ND  |
| cervix                             | 11  | 0 (0)                        | 4 (0.4)  | 0 (0)    | 0 (0) | 0 (0)       | 0 (0)                  | 0 (0)       | ND                       | ND  |
| endometrium                        | 9   | 0 (0)                        | 1 (0.1)  | 0 (0)    | 0 (0) | 0 (0)       | 0 (0)                  | 0 (0)       | ND                       | ND  |
| eye                                | 1   | 0 (0)                        | 0 (0)    | 0 (0)    | 0 (0) | 0 (0)       | 0 (0)                  | 0 (0)       | ND                       | ND  |
| gastrointestinal_tract             | 1   | 0 (0)                        | 0 (0)    | 0 (0)    | 0 (0) | 0 (0)       | 0 (0)                  | 0 (0)       | ND                       | ND  |
| haematopoietic_and_lymphoid_tissue | 124 | 1 (0)                        | 3 (0)    | 2 (0)    | 0 (0) | 0 (0)       | 0 (0)                  | 2 (0)       | ND                       | ND  |
| kidney                             | 20  | 0 (0)                        | 3 (0.2)  | 1 (0.1)  | 0 (0) | 0 (0)       | 0 (0)                  | 0 (0)       | ND                       | ND  |
| large_intestine                    | 36  | 1 (0)                        | 2 (0.1)  | 1 (0)    | 0 (0) | 0 (0)       | 0 (0)                  | 1 (0)       | ND                       | ND  |
| liver                              | 8   | 0 (0)                        | 0 (0)    | 1 (0.1)  | 0 (0) | 0 (0)       | 0 (0)                  | 1 (0.1)     | ND                       | ND  |
| lung                               | 145 | 0 (0)                        | 22 (0.2) | 12 (0.1) | 0 (0) | 0 (0)       | 0 (0)                  | 4 (0)       | ND                       | ND  |
| oesophagus                         | 21  | 0 (0)                        | 4 (0.2)  | 0 (0)    | 0 (0) | 0 (0)       | 0 (0)                  | 0 (0)       | ND                       | ND  |
| ovary                              | 22  | 2 (0.1)                      | 4 (0.2)  | 1 (0)    | 0 (0) | 0 (0)       | 0 (0)                  | 4 (0.2)     | ND                       | ND  |
| pancreas                           | 17  | 0 (0)                        | 1 (0.1)  | 0 (0)    | 0 (0) | 0 (0)       | 0 (0)                  | 1 (0.1)     | ND                       | ND  |
| placenta                           | 2   | 0 (0)                        | 0 (0)    | 0 (0)    | 0 (0) | 0 (0)       | 0 (0)                  | 0 (0)       | ND                       | ND  |
| pleura                             | 5   | 0 (0)                        | 1 (0.2)  | 0 (0)    | 0 (0) | 0 (0)       | 0 (0)                  | 0 (0)       | ND                       | ND  |
| prostate                           | 5   | 0 (0)                        | 0 (0)    | 0 (0)    | 0 (0) | 0 (0)       | 0 (0)                  | 1 (0.2)     | ND                       | ND  |
| skin                               | 51  | 2 (0)                        | 6 (0.1)  | 0 (0)    | 0 (0) | 0 (0)       | 0 (0)                  | 3 (0.1)     | ND                       | ND  |
| small_intestine                    | 1   | 0 (0)                        | 0 (0)    | 0 (0)    | 0 (0) | 0 (0)       | 0 (0)                  | 0 (0)       | ND                       | ND  |
| soft_tissue                        | 19  | 0 (0)                        | 3 (0.2)  | 0 (0)    | 0 (0) | 0 (0)       | 0 (0)                  | 0 (0)       | ND                       | ND  |
| stomach                            | 21  | 1 (0)                        | 3 (0.1)  | 0 (0)    | 0 (0) | 0 (0)       | 0 (0)                  | 2 (0.1)     | ND                       | ND  |
| testis                             | 3   | 0 (0)                        | 1 (0.3)  | 0 (0)    | 0 (0) | 0 (0)       | 0 (0)                  | 0 (0)       | ND                       | ND  |
| thyroid                            | 11  | 0 (0)                        | 0 (0)    | 1 (0.1)  | 0 (0) | 0 (0)       | 0 (0)                  | 0 (0)       | ND                       | ND  |
| not specified                      | 1   | 0 (0)                        | 0 (0)    | 0 (0)    | 0 (0) | 0 (0)       | 0 (0)                  | 0 (0)       | ND                       | ND  |
| upper_aerodigestive_tract          | 20  | 0 (0)                        | 2 (0.1)  | 1 (0.1)  | 0 (0) | 0 (0)       | 0 (0)                  | 1 (0.1)     | ND                       | ND  |
| urinary_tract                      | 16  | 0 (0)                        | 2 (0.1)  | 0 (0)    | 0 (0) | 0 (0)       | 0 (0)                  | 1 (0.1)     | ND                       | ND  |
| vulva                              | 3   | 0 (0)                        | 0 (0)    | 1 (0.3)  | 0 (0) | 0 (0)       | 0 (0)                  | 0 (0)       | ND                       | ND  |

## WWOX (FRA)

| Cancer Cell lines                  |     | Somatic hemizygous deletions |          |          |          | Somatic HDs | Somatic Amplifications | Breakpoints | Known Cancer Gene Screen |     |
|------------------------------------|-----|------------------------------|----------|----------|----------|-------------|------------------------|-------------|--------------------------|-----|
| Tissue                             | No  | <1Mb                         | >1Mb     | Arm      | Chr      |             |                        |             | Point Mutations          | HDs |
| adrenal_gland                      | 2   | 0 (0)                        | 1 (0.5)  | 1 (0.5)  | 0 (0)    | 0 (0)       | 0 (0)                  | 1 (0.5)     | 0 (0)                    | ND  |
| autonomic_ganglia                  | 36  | 6 (0.2)                      | 3 (0.1)  | 0 (0)    | 0 (0)    | 2 (0.1)     | 0 (0)                  | 13 (0.4)    | 1 (0)                    | ND  |
| biliary_tract                      | 6   | 2 (0.3)                      | 0 (0)    | 1 (0.2)  | 0 (0)    | 0 (0)       | 0 (0)                  | 2 (0.3)     | 0 (0)                    | ND  |
| bone                               | 32  | 1 (0)                        | 6 (0.2)  | 2 (0.1)  | 1 (0)    | 0 (0)       | 0 (0)                  | 3 (0.1)     | 0 (0)                    | ND  |
| breast                             | 42  | 3 (0.1)                      | 13 (0.3) | 4 (0.1)  | 1 (0)    | 0 (0)       | 0 (0)                  | 7 (0.2)     | 0 (0)                    | ND  |
| central_nervous_system             | 55  | 7 (0.1)                      | 4 (0.1)  | 0 (0)    | 0 (0)    | 0 (0)       | 0 (0)                  | 10 (0.2)    | 0 (0)                    | ND  |
| cervix                             | 11  | 0 (0)                        | 0 (0)    | 0 (0)    | 0 (0)    | 0 (0)       | 0 (0)                  | 2 (0.2)     | 0 (0)                    | ND  |
| endometrium                        | 9   | 1 (0.1)                      | 1 (0.1)  | 1 (0.1)  | 0 (0)    | 0 (0)       | 0 (0)                  | 2 (0.2)     | 0 (0)                    | ND  |
| eye                                | 1   | 0 (0)                        | 0 (0)    | 0 (0)    | 0 (0)    | 0 (0)       | 0 (0)                  | 0 (0)       | 0 (0)                    | ND  |
| gastrointestinal_tract             | 1   | 0 (0)                        | 0 (0)    | 0 (0)    | 0 (0)    | 0 (0)       | 0 (0)                  | 0 (0)       | 0 (0)                    | ND  |
| haematopoietic_and_lymphoid_tissue | 124 | 15 (0.1)                     | 7 (0.1)  | 4 (0)    | 2 (0)    | 4 (0)       | 0 (0)                  | 29 (0.2)    | 0 (0)                    | ND  |
| kidney                             | 20  | 5 (0.3)                      | 1 (0.1)  | 0 (0)    | 3 (0.2)  | 0 (0)       | 0 (0)                  | 5 (0.3)     | 0 (0)                    | ND  |
| large_intestine                    | 36  | 19 (0.5)                     | 2 (0.1)  | 0 (0)    | 0 (0)    | 7 (0.2)     | 0 (0)                  | 20 (0.6)    | 0 (0)                    | ND  |
| liver                              | 8   | 2 (0.3)                      | 1 (0.1)  | 1 (0.1)  | 2 (0.3)  | 0 (0)       | 0 (0)                  | 3 (0.4)     | 0 (0)                    | ND  |
| lung                               | 145 | 15 (0.1)                     | 31 (0.2) | 10 (0.1) | 11 (0.1) | 7 (0)       | 0 (0)                  | 50 (0.3)    | 0 (0)                    | ND  |
| oesophagus                         | 21  | 3 (0.1)                      | 0 (0)    | 0 (0)    | 2 (0.1)  | 0 (0)       | 0 (0)                  | 11 (0.5)    | 0 (0)                    | ND  |
| ovary                              | 22  | 4 (0.2)                      | 3 (0.1)  | 1 (0)    | 2 (0.1)  | 3 (0.1)     | 0 (0)                  | 8 (0.4)     | 1 (0)                    | ND  |
| pancreas                           | 17  | 4 (0.2)                      | 2 (0.1)  | 0 (0)    | 1 (0.1)  | 4 (0.2)     | 0 (0)                  | 10 (0.6)    | 0 (0)                    | ND  |
| placenta                           | 2   | 1 (0.5)                      | 0 (0)    | 0 (0)    | 0 (0)    | 0 (0)       | 0 (0)                  | 2 (1)       | 0 (0)                    | ND  |
| pleura                             | 5   | 0 (0)                        | 0 (0)    | 0 (0)    | 0 (0)    | 0 (0)       | 0 (0)                  | 0 (0)       | 0 (0)                    | ND  |
| prostate                           | 5   | 1 (0.2)                      | 0 (0)    | 0 (0)    | 1 (0.2)  | 0 (0)       | 0 (0)                  | 3 (0.6)     | 0 (0)                    | ND  |
| skin                               | 51  | 4 (0.1)                      | 10 (0.2) | 0 (0)    | 0 (0)    | 1 (0)       | 0 (0)                  | 11 (0.2)    | 0 (0)                    | ND  |
| small_intestine                    | 1   | 1 (1)                        | 0 (0)    | 0 (0)    | 0 (0)    | 0 (0)       | 0 (0)                  | 1 (1)       | 0 (0)                    | ND  |
| soft_tissue                        | 19  | 4 (0.2)                      | 1 (0.1)  | 0 (0)    | 0 (0)    | 5 (0.3)     | 0 (0)                  | 6 (0.3)     | 0 (0)                    | ND  |
| stomach                            | 21  | 10 (0.5)                     | 1 (0)    | 0 (0)    | 1 (0)    | 9 (0.4)     | 0 (0)                  | 16 (0.8)    | 0 (0)                    | ND  |
| testis                             | 3   | 0 (0)                        | 0 (0)    | 0 (0)    | 1 (0.3)  | 0 (0)       | 0 (0)                  | 0 (0)       | 0 (0)                    | ND  |
| thyroid                            | 11  | 2 (0.2)                      | 1 (0.1)  | 1 (0.1)  | 1 (0.1)  | 0 (0)       | 0 (0)                  | 4 (0.4)     | 0 (0)                    | ND  |
| not specified                      | 1   | 0 (0)                        | 0 (0)    | 0 (0)    | 0 (0)    | 0 (0)       | 0 (0)                  | 0 (0)       | 0 (0)                    | ND  |
| upper_aerodigestive_tract          | 20  | 2 (0.1)                      | 1 (0.1)  | 2 (0.1)  | 0 (0)    | 0 (0)       | 0 (0)                  | 6 (0.3)     | 0 (0)                    | ND  |
| urinary_tract                      | 16  | 2 (0.1)                      | 1 (0.1)  | 1 (0.1)  | 1 (0.1)  | 2 (0.1)     | 0 (0)                  | 5 (0.3)     | 0 (0)                    | ND  |
| vulva                              | 3   | 0 (0)                        | 0 (0)    | 0 (0)    | 0 (0)    | 0 (0)       | 0 (0)                  | 0 (0)       | 0 (0)                    | ND  |



































**Supplementary Table 4.** Putative oncogenic mutations in 46 known cancer genes.

| Gene          | Transcript      | Coverage (%) | Point mutations (LOM) | Point mutations (TOV) | HDs | Amplicons | Total |
|---------------|-----------------|--------------|-----------------------|-----------------------|-----|-----------|-------|
| <i>APC</i>    | NM_000038       | 99           | 33                    | 7                     |     |           | 40    |
| <i>BHD</i>    | NM_144997.3     | 96           | 2                     | 12                    |     |           | 14    |
| <i>BRAF</i>   | NM_004333       | 93           | 65                    | 0                     |     |           | 65    |
| <i>BRCA1</i>  | NM_007294.1     | 76           | 0                     | 1                     |     |           | 1     |
| <i>BRCA2</i>  | NM_000059.1     | 88           | 6                     | 20                    |     |           | 26    |
| <i>CDH1</i>   | NM_004360.2     | 99           | 8                     | 6                     | 3   |           | 17    |
| <i>CDKN2A</i> | NM_000077       | 93           | 52                    | 3                     | 232 |           | 287   |
| <i>CTNNB1</i> | NM_001904       | 98           | 14                    | 0                     |     |           | 14    |
| <i>CYLD</i>   | NM_015247.1     | 81           | 1                     | 2                     | 1   |           | 4     |
| <i>EGFR</i>   | NM_005228       | 94           | 8                     | 0                     |     | 9         | 17    |
| <i>ERBB2</i>  | NM_004448       | 92           | 0                     | 0                     |     | 17        | 17    |
| <i>FBXW7</i>  | NM_033632.1     | 96           | 26                    | 0                     |     |           | 26    |
| <i>FGFR3</i>  | NM_000142       | 82           | 2                     | 0                     |     |           | 2     |
| <i>FLT3</i>   | Z26652          | 86           | 3                     | 0                     |     |           | 3     |
| <i>GNAS</i>   | NM_000516.3     | 75           | 1                     | 0                     |     |           | 1     |
| <i>HRAS</i>   | NM_005343       | 99           | 7                     | 0                     |     |           | 7     |
| <i>JAK2</i>   | NM_004972       | 74           | 1                     | 0                     |     |           | 1     |
| <i>KIT</i>    | NM_000222       | 71           | 0                     | 0                     |     |           | 0     |
| <i>KRAS</i>   | NM_004985       | 98           | 87                    | 0                     |     |           | 87    |
| <i>MAP2K4</i> | NM_003010       | 74           | 2                     | 3                     | 13  |           | 18    |
| <i>MLH1</i>   | NM_000249.2     | 90           | 10                    | 2                     | 2   |           | 14    |
| <i>MSH2</i>   | NM_000251.1     | 88           | 5                     | 4                     | 5   |           | 14    |
| <i>MSH6</i>   | NM_000179.1     | 93           | 8                     | 13                    | 1   |           | 22    |
| <i>MYC</i>    | NM_002467.2     | 82           | 0                     | 0                     |     | 47        | 47    |
| <i>NF1</i>    | ENST00000358273 | 60           | 16                    | 9                     | 9   |           | 34    |
| <i>NF2</i>    | NM_000268.2     | 97           | 18                    | 5                     | 4   |           | 27    |
| <i>NOTCH1</i> | NM_017617.2     | 82           | 16                    | 0                     |     |           | 16    |
| <i>NPM1</i>   | NM_002520.4     | 77           | 0                     | 0                     |     |           | 0     |
| <i>NRAS</i>   | NM_002524.2     | 98           | 46                    | 0                     |     |           | 46    |
| <i>NTRK3</i>  | NM_002530       | 83           | 0                     | 0                     |     |           | 0     |
| <i>PALB2</i>  | ENST00000261584 | 93           | 0                     | 4                     |     |           | 4     |
| <i>PDGFRA</i> | NM_006206       | 81           | 0                     | 0                     |     |           | 0     |
| <i>PHOX2B</i> | ENST00000381741 | 59           | 0                     | 1                     |     |           | 1     |
| <i>PIK3CA</i> | NM_006218.1     | 96           | 62                    | 0                     |     |           | 62    |
| <i>PTCH</i>   | NM_000264.2     | 75           | 0                     | 7                     |     |           | 7     |
| <i>PTEN</i>   | NM_000314       | 94           | 62                    | 9                     | 38  |           | 109   |
| <i>RB1</i>    | NM_000321       | 94           | 83                    | 6                     | 21  |           | 110   |
| <i>RUNX1</i>  | ENST00000300305 | 65           | 2                     | 0                     |     |           | 2     |
| <i>SMAD4</i>  | NM_005359.3     | 98           | 14                    | 4                     | 16  |           | 34    |
| <i>SMO</i>    | NM_005631.3     | 74           | 0                     | 0                     |     |           | 0     |
| <i>SOCS1</i>  | NM_003745.1     | 75           | 0                     | 1                     | 1   |           | 2     |
| <i>STK11</i>  | NM_000455       | 84           | 23                    | 2                     | 12  |           | 37    |
| <i>SUFU</i>   | NM_016169.2     | 82           | 0                     | 0                     |     |           | 0     |
| <i>TP53</i>   | NM_000546       | 94           | 466                   | 9                     | 5   |           | 480   |
| <i>UTX</i>    | NM_021140.1     | 79           | 10                    | 5                     | 15  |           | 30    |
| <i>VHL</i>    | NM_000551.2     | 99           | 7                     | 1                     |     |           | 8     |

The number of oncogenic mutations in 46 known cancer genes screened through the series of 746 cancer cell lines. The table includes the number of times genes are present within high level genomic amplification (CN=>10) where such gene amplifications have been implicated in carcinogenesis (<http://www.sanger.ac.uk/genetics/CGP/Census/>) and the number of homozygous deletions detected by either multiplex PCR analysis or the SNP6.0 array. The distribution of mutations, amplifications and HDs across the tissues and samples can be obtained using CONAN (<http://www.sanger.ac.uk/cgi-bin/genetics/CGP/conan/search.cgi>), and is shown in Supplementary Table 3. The coverage gives the level of sequence coverage for the gene across the complete

sample set. The mutations have been classified as likely oncogenic mutations (LOM) and tentative oncogenic variants (TOV). Likely oncogenic mutations are sequence changes that have previously been shown to be somatic mutations in human cancer and/or those consistent with the position and type of mutations for a given gene. This class includes homozygous and compound heterozygous inactivating mutations in tumour suppressor genes. Tentative oncogenic variants (TOV) are inactivating mutations present as heterozygous variants in tumour suppressor genes other than missense mutations in *TP53* and *FBXW7* which are included in the LOM class. This work is ongoing.

**Supplementary Table 5.** Zygosity patterns for the mutations within recessive cancer genes screened in this study.

| Zygosity status   | Mutation Class | APC | BHD | BRCA1 | BRCA2 | CDH1 | CDKN2A | CYLD | FBXW7 | MADH4 | MAP2K4 | MLH1 | MSH2 | MSH6 | NF1 | NF2 | PALB2 | PTCH | PTEN | RB1 | SMAD4 | SOC1 | STK11 | TP53 | VHL | Total |
|-------------------|----------------|-----|-----|-------|-------|------|--------|------|-------|-------|--------|------|------|------|-----|-----|-------|------|------|-----|-------|------|-------|------|-----|-------|
| Hemi (<1Mb)       | Comp           |     |     |       |       |      | 1      |      |       |       |        |      |      |      |     |     |       |      |      |     |       |      |       |      |     | 1     |
|                   | HD (<1Mb)      |     |     |       |       |      | 12     |      |       |       |        |      | 2    |      |     |     |       |      | 2    | 1   |       | 1    |       |      |     | 18    |
|                   | Missense       |     |     |       |       |      |        |      |       |       |        |      |      |      |     |     |       |      |      |     |       |      |       | 1    |     | 1     |
|                   | Nonsense       | 1   |     |       | 1     | 2    | 1      |      |       |       |        |      |      |      | 1   |     |       |      |      |     |       |      | 1     | 2    |     | 9     |
|                   | Splice         |     |     |       |       |      | 1      |      |       |       |        |      |      |      |     |     |       |      | 1    | 1   |       |      |       | 1    |     | 4     |
| Hemi (<1Mb) Total |                | 1   |     |       | 1     | 2    | 15     |      |       |       |        |      | 2    |      | 1   |     |       |      | 3    | 2   |       | 1    | 1     | 4    |     | 33    |
| Hemi (>1Mb)       | Comp           | 1   |     |       |       |      |        |      |       |       |        |      |      |      |     |     |       |      |      |     |       |      |       | 5    |     | 6     |
|                   | HD (<1Mb)      |     |     |       |       | 3    | 76     | 1    |       |       | 2      | 1    | 1    |      | 5   |     |       |      | 13   | 15  | 10    |      | 5     | 5    |     | 137   |
|                   | HD (>1Mb)      |     |     |       |       |      | 49     |      |       |       |        | 1    | 1    | 1    |     |     |       |      | 1    | 1   | 1     |      |       |      |     | 55    |
|                   | Missense       |     |     |       |       | 1    | 6      |      | 2     |       |        |      |      |      |     |     |       | 3    | 1    |     |       |      | 4     | 104  | 1   | 122   |
|                   | Nonsense       | 12  |     |       | 1     | 2    | 8      |      | 1     |       | 1      | 3    | 3    | 1    | 7   | 3   |       |      | 9    | 32  |       | 6    | 29    | 4    |     | 122   |
| Hemi (>1Mb) Total |                | 13  |     |       | 1     | 8    | 139    | 2    | 3     |       | 3      | 8    | 5    | 2    | 13  | 5   |       |      | 29   | 55  | 11    |      | 15    | 152  | 5   | 469   |
| Hemi (Arm)        | Comp           |     |     |       |       |      | 1      |      |       |       |        |      |      |      |     |     |       |      |      |     |       |      |       |      |     | 1     |
|                   | HD (<1Mb)      |     |     |       |       |      | 21     |      |       |       | 2      |      |      |      |     | 4   |       |      | 1    | 4   | 2     |      | 2     |      |     | 36    |
|                   | HD (>1Mb)      |     |     |       |       |      | 13     |      |       |       |        |      |      |      |     |     |       |      |      |     |       |      |       |      |     | 13    |
|                   | Missense       |     |     |       |       |      | 1      |      |       |       |        |      |      |      |     |     |       | 1    | 2    |     |       |      | 1     | 100  |     | 105   |
|                   | Nonsense       |     |     |       | 6     | 1    | 10     |      |       |       | 1      |      |      |      |     | 11  |       |      | 2    | 27  |       | 5    | 35    | 1    |     | 99    |
| Hemi (Arm) Total  |                |     |     |       | 6     | 1    | 50     |      |       |       | 3      |      |      |      |     | 18  |       |      | 5    | 45  | 2     |      | 9     | 146  | 2   | 287   |
| Hemi (Chr)        | Comp           |     |     |       |       |      | 2      |      |       |       |        |      |      |      |     |     |       |      |      |     |       |      |       | 1    |     | 3     |
|                   | HD (<1Mb)      |     |     |       |       |      | 39     |      |       |       | 7      |      | 1    |      | 4   |     |       |      | 20   |     | 1     |      | 4     |      |     | 76    |
|                   | HD (>1Mb)      |     |     |       |       |      | 21     |      |       |       | 1      |      |      |      |     |     |       |      | 1    |     | 2     |      |       |      |     | 25    |
|                   | Missense       |     |     |       |       |      | 4      |      | 1     |       |        |      |      |      |     |     |       | 7    |      |     |       |      |       | 71   |     | 83    |
|                   | Nonsense       | 7   | 1   |       |       |      | 8      |      |       |       |        | 1    | 3    | 5    |     |     |       | 17   |      |     |       |      | 4     | 15   |     | 61    |
| Hemi (Chr) Total  |                | 7   | 1   |       |       | 1    | 75     |      | 1     |       | 8      |      | 3    | 3    | 10  |     |       | 50   |      | 3   |       |      | 8     | 96   |     | 266   |
| Het               | Comp           | 13  |     |       | 3     |      | 2      |      |       |       | 1      | 1    | 6    | 3    | 1   |     |       | 11   | 3    |     |       |      | 1     | 38   |     | 83    |
|                   | HD (<1Mb)      |     |     |       |       |      | 1      |      |       |       | 1      |      |      |      |     |     |       |      |      |     |       |      | 1     |      |     | 3     |
|                   | Missense       |     |     |       |       |      | 1      |      | 16    |       | 1      |      |      |      |     |     |       | 1    |      |     |       |      |       | 32   |     | 51    |
|                   | Nonsense       | 6   | 12  | 1     | 15    | 4    | 3      | 2    | 6     | 15    | 2      | 3    | 3    | 10   | 7   | 3   | 4     | 7    | 9    | 4   |       | 1    | 2     | 10   | 1   | 130   |
|                   | Splice         |     | 1   |       |       | 1    | 1      |      |       | 3     |        | 2    |      | 1    |     |     |       | 1    | 1    |     |       |      |       | 2    |     | 13    |
| Het Total         |                | 19  | 13  | 1     | 18    | 5    | 8      | 2    | 22    | 18    | 4      | 6    | 4    | 17   | 10  | 4   | 4     | 7    | 22   | 8   |       | 1    | 4     | 82   | 1   | 280   |
| Total             |                | 40  | 14  | 1     | 26    | 17   | 287    | 4    | 26    | 18    | 18     | 14   | 14   | 22   | 34  | 27  | 4     | 7    | 109  | 110 | 16    | 2    | 37    | 480  | 8   | 1335  |

25 recessive cancer genes were screened for this study, including UTX. This table present the zygosity status for the 24 genes on autosomal chromosomes. These genes contain a total of 1335 putative oncogenic mutations (Supplementary Table 5) of which 363 are homozygous deletions detected by either multiplex PCR, the Affymetrix SNP6 array or both. The Mutations are grouped by the zygosity of the genomic loci in which they reside as determined by the SNP6 array, with mutations in small hemizygous deletion (<1Mb), large hemizygous deletions (<1Mb), hemizygous deletions of chromosome arms (Arm) and whole chromosomes (Chr) together with those in heterozygous regions. 15 point mutations are present in small hemizygous deletions and these are listed in more detail in Supplementary Table 8.

**Supplementary Table 6.** Deletion profiles for the CNP homozygous deletion clusters within the series of 466 control DNAs

| Cluster_ID      | Chr | Start     | End       | Size    | HDs | n <sub>WW</sub> | n <sub>WL</sub> | n <sub>WS</sub> | n <sub>LL</sub> | n <sub>LS</sub> | n <sub>SS</sub> | genes                                   |
|-----------------|-----|-----------|-----------|---------|-----|-----------------|-----------------|-----------------|-----------------|-----------------|-----------------|-----------------------------------------|
| CNVcluster_955  | 1   | 72522436  | 72535959  | 13524   | 2   | 447             | 9               | 8               | 0               | 0               | 2               |                                         |
| CNVcluster_956  | 1   | 72541007  | 72583737  | 42731   | 64  | 283             | 31              | 88              | 0               | 17              | 47              |                                         |
| CNVcluster_959  | 1   | 94903267  | 94927988  | 24722   | 1   | 459             | 1               | 5               | 0               | 0               | 1               |                                         |
| CNVcluster_962  | 1   | 111177090 | 111189750 | 12661   | 1   | 459             | 0               | 6               | 0               | 0               | 1               |                                         |
| CNVcluster_964  | 1   | 112497197 | 112507480 | 10284   | 8   | 457             | 1               | 0               | 0               | 0               | 8               |                                         |
| CNVcluster_965  | 1   | 147215827 | 147579424 | 363598  | 11  | 394             | 11              | 50              | 0               | 0               | 11              |                                         |
| CNVcluster_966  | 1   | 150822152 | 150857189 | 35038   | 136 | 237             | 4               | 89              | 0               | 3               | 133             | LCE3C(136) LCE3B(81)                    |
| CNVcluster_967  | 1   | 151026302 | 151035325 | 9024    | 24  | 407             | 5               | 30              | 0               | 1               | 23              | LCE1E(1)                                |
| CNVcluster_972  | 1   | 173063029 | 173068478 | 5450    | 2   | 446             | 18              | 0               | 0               | 2               | 0               |                                         |
| CNVcluster_974  | 1   | 194994474 | 195068696 | 74223   | 38  | 410             | 6               | 12              | 0               | 6               | 32              | CFHR3(38)                               |
| CNVcluster_975  | 1   | 195079131 | 195171783 | 92653   | 1   | 419             | 12              | 34              | 0               | 1               | 0               | CFHR4(1)                                |
| CNVcluster_980  | 1   | 246354412 | 247191012 | 836601  | 9   | 452             | 3               | 2               | 0               | 0               | 9               | OR2T34(1) OR2T10(9) OR2T11(9)           |
| CNVcluster_982  | 2   | 4191740   | 4201895   | 10156   | 2   | 457             | 1               | 6               | 0               | 0               | 2               |                                         |
| CNVcluster_986  | 2   | 34538784  | 34590562  | 51779   | 19  | 444             | 1               | 2               | 0               | 0               | 19              |                                         |
| CNVcluster_989  | 2   | 41091948  | 41099392  | 7445    | 1   | 453             | 8               | 4               | 0               | 1               | 0               |                                         |
| CNVcluster_990  | 2   | 52597429  | 52641453  | 44025   | 48  | 362             | 1               | 55              | 0               | 0               | 48              |                                         |
| CNVcluster_991  | 2   | 88912183  | 89335000  | 422818  | 87  | 246             | 27              | 107             | 0               | 8               | 78              | ENSG00000214334(55) ENSG00000204734(41) |
| CNVcluster_992  | 2   | 89572002  | 91049142  | 1477141 | 5   | 399             | 42              | 21              | 0               | 2               | 2               |                                         |
| CNVcluster_993  | 2   | 106247146 | 106251790 | 4645    | 1   | 463             | 2               | 0               | 0               | 1               | 0               |                                         |
| CNVcluster_996  | 2   | 129354949 | 129356786 | 1838    | 1   | 463             | 2               | 0               | 0               | 1               | 0               |                                         |
| CNVcluster_997  | 2   | 146580875 | 146583405 | 2531    | 10  | 439             | 3               | 14              | 0               | 0               | 10              |                                         |
| CNVcluster_998  | 2   | 161145452 | 161145464 | 13      | 1   | 456             | 8               | 1               | 0               | 1               | 0               |                                         |
| CNVcluster_999  | 2   | 178143397 | 178145593 | 2197    | 1   | 457             | 8               | 0               | 0               | 1               | 0               |                                         |
| CNVcluster_1002 | 2   | 203004021 | 203021728 | 17708   | 1   | 455             | 4               | 6               | 0               | 0               | 1               |                                         |
| CNVcluster_1007 | 3   | 6198313   | 6215261   | 16949   | 1   | 454             | 3               | 8               | 0               | 0               | 1               |                                         |
| CNVcluster_1008 | 3   | 6620601   | 6630372   | 9772    | 1   | 462             | 3               | 0               | 0               | 0               | 1               |                                         |
| CNVcluster_1010 | 3   | 46768382  | 46824594  | 56213   | 7   | 449             | 8               | 2               | 0               | 0               | 7               |                                         |
| CNVcluster_1014 | 3   | 65164276  | 65185493  | 21218   | 1   | 455             | 3               | 7               | 0               | 0               | 1               |                                         |
| CNVcluster_1015 | 3   | 68828950  | 68830104  | 1155    | 4   | 447             | 1               | 14              | 0               | 3               | 1               |                                         |
| CNVcluster_1016 | 3   | 75503861  | 75728075  | 224215  | 2   | 453             | 4               | 7               | 0               | 0               | 2               | ENSG00000163612(2)                      |
| CNVcluster_1017 | 3   | 84261724  | 84265644  | 3921    | 1   | 448             | 17              | 0               | 0               | 1               | 0               |                                         |
| CNVcluster_1019 | 3   | 100427149 | 100432112 | 4964    | 4   | 454             | 7               | 1               | 0               | 1               | 3               |                                         |
| CNVcluster_1020 | 3   | 127194961 | 127204553 | 9593    | 1   | 464             | 1               | 0               | 0               | 0               | 1               |                                         |
| CNVcluster_1021 | 3   | 131246389 | 131289689 | 43301   | 8   | 443             | 5               | 10              | 0               | 0               | 8               |                                         |
| CNVcluster_1024 | 3   | 163620295 | 163625400 | 5106    | 2   | 449             | 8               | 7               | 0               | 1               | 1               |                                         |
| CNVcluster_1025 | 3   | 163699324 | 163709654 | 10331   | 4   | 446             | 8               | 8               | 0               | 1               | 3               |                                         |
| CNVcluster_1026 | 3   | 163995352 | 164108690 | 113339  | 44  | 354             | 11              | 57              | 0               | 7               | 37              |                                         |
| CNVcluster_1032 | 4   | 4186483   | 4203662   | 17180   | 1   | 462             | 3               | 0               | 0               | 1               | 0               |                                         |
| CNVcluster_1033 | 4   | 9070329   | 9088444   | 18116   | 1   | 449             | 12              | 4               | 0               | 1               | 0               |                                         |
| CNVcluster_1034 | 4   | 9819062   | 9847535   | 28474   | 79  | 320             | 9               | 58              | 0               | 4               | 75              |                                         |

| Cluster_ID      | Chr | Start     | End       | Size   | HDs | n <sub>WW</sub> | n <sub>WL</sub> | n <sub>WS</sub> | n <sub>LL</sub> | n <sub>LS</sub> | n <sub>SS</sub> | genes                     |
|-----------------|-----|-----------|-----------|--------|-----|-----------------|-----------------|-----------------|-----------------|-----------------|-----------------|---------------------------|
| CNVcluster_1035 | 4   | 10001452  | 10009767  | 8316   | 4   | 416             | 7               | 39              | 0               | 2               | 2               |                           |
| CNVcluster_1036 | 4   | 11978983  | 11993126  | 14144  | 1   | 459             | 2               | 4               | 0               | 1               | 0               |                           |
| CNVcluster_1037 | 4   | 20165810  | 20173011  | 7202   | 1   | 454             | 8               | 3               | 0               | 0               | 1               |                           |
| CNVcluster_1038 | 4   | 20981138  | 20985872  | 4735   | 1   | 458             | 6               | 1               | 0               | 0               | 1               |                           |
| CNVcluster_1041 | 4   | 34455256  | 34506268  | 51013  | 9   | 450             | 5               | 2               | 0               | 0               | 9               |                           |
| CNVcluster_1042 | 4   | 64380065  | 64390819  | 10755  | 1   | 461             | 4               | 0               | 0               | 1               | 0               |                           |
| CNVcluster_1043 | 4   | 67889758  | 67889777  | 20     | 1   | 461             | 4               | 0               | 0               | 1               | 0               |                           |
| CNVcluster_1044 | 4   | 68964801  | 69187711  | 222911 | 89  | 307             | 9               | 61              | 0               | 6               | 83              | TMPRSS11E(19) UGT2B17(87) |
| CNVcluster_1045 | 4   | 70158100  | 70273685  | 115586 | 25  | 433             | 8               | 0               | 0               | 4               | 21              | UGT2B28(25)               |
| CNVcluster_1048 | 4   | 104426264 | 104467384 | 41121  | 1   | 451             | 5               | 9               | 0               | 0               | 1               |                           |
| CNVcluster_1052 | 4   | 115394773 | 115401625 | 6853   | 2   | 461             | 3               | 0               | 0               | 2               | 0               |                           |
| CNVcluster_1062 | 4   | 162099469 | 162104460 | 4992   | 1   | 461             | 1               | 3               | 0               | 0               | 1               |                           |
| CNVcluster_1064 | 4   | 173225876 | 173226109 | 234    | 1   | 463             | 2               | 0               | 0               | 1               | 0               |                           |
| CNVcluster_1071 | 5   | 8755241   | 8800142   | 44902  | 2   | 449             | 1               | 14              | 0               | 0               | 2               |                           |
| CNVcluster_1075 | 5   | 21486958  | 21488196  | 1239   | 1   | 461             | 4               | 0               | 0               | 1               | 0               |                           |
| CNVcluster_1085 | 5   | 121057147 | 121058508 | 1362   | 1   | 460             | 5               | 0               | 0               | 1               | 0               |                           |
| CNVcluster_1086 | 5   | 122075211 | 122075827 | 617    | 1   | 455             | 9               | 1               | 0               | 0               | 1               |                           |
| CNVcluster_1087 | 5   | 151495580 | 151498545 | 2966   | 2   | 458             | 4               | 2               | 0               | 1               | 1               |                           |
| CNVcluster_1091 | 5   | 180311317 | 180363501 | 52185  | 3   | 461             | 1               | 1               | 0               | 0               | 3               | BTNL3(3)                  |
| CNVcluster_1094 | 6   | 16532122  | 16696284  | 164163 | 1   | 455             | 10              | 0               | 0               | 1               | 0               |                           |
| CNVcluster_1095 | 6   | 29958346  | 30012844  | 54499  | 12  | 409             | 36              | 9               | 0               | 6               | 6               | HLAH_HUMAN(4)             |
| CNVcluster_1097 | 6   | 52732558  | 52734792  | 2235   | 2   | 461             | 3               | 0               | 0               | 2               | 0               |                           |
| CNVcluster_1098 | 6   | 54039111  | 54039815  | 705    | 3   | 454             | 6               | 3               | 0               | 2               | 1               |                           |
| CNVcluster_1100 | 6   | 62292492  | 62292497  | 6      | 1   | 429             | 36              | 0               | 0               | 1               | 0               |                           |
| CNVcluster_1101 | 6   | 66456204  | 66460574  | 4371   | 1   | 459             | 5               | 1               | 0               | 1               | 0               |                           |
| CNVcluster_1102 | 6   | 67065532  | 67105350  | 39819  | 1   | 443             | 6               | 16              | 0               | 0               | 1               |                           |
| CNVcluster_1103 | 6   | 74648953  | 74658139  | 9187   | 2   | 453             | 10              | 1               | 0               | 1               | 1               |                           |
| CNVcluster_1105 | 6   | 77493252  | 77517792  | 24541  | 9   | 451             | 5               | 1               | 0               | 0               | 9               |                           |
| CNVcluster_1106 | 6   | 79019594  | 79098352  | 78759  | 14  | 365             | 14              | 73              | 0               | 0               | 14              |                           |
| CNVcluster_1107 | 6   | 81340909  | 81351061  | 10153  | 1   | 449             | 13              | 3               | 0               | 0               | 1               |                           |
| CNVcluster_1108 | 6   | 81355772  | 81360690  | 4919   | 1   | 450             | 12              | 3               | 0               | 1               | 0               |                           |
| CNVcluster_1111 | 6   | 93632588  | 93635352  | 2765   | 1   | 457             | 6               | 2               | 0               | 0               | 1               |                           |
| CNVcluster_1112 | 6   | 103844670 | 103868755 | 24086  | 16  | 386             | 4               | 60              | 0               | 3               | 13              |                           |
| CNVcluster_1114 | 6   | 134770667 | 134771095 | 429    | 1   | 460             | 5               | 0               | 0               | 1               | 0               |                           |
| CNVcluster_1115 | 6   | 162658559 | 162660431 | 1873   | 1   | 459             | 3               | 3               | 0               | 1               | 0               |                           |
| CNVcluster_1116 | 7   | 17525826  | 17529807  | 3982   | 1   | 462             | 2               | 1               | 0               | 0               | 1               |                           |
| CNVcluster_1118 | 7   | 54354000  | 54354012  | 13     | 1   | 461             | 2               | 2               | 0               | 0               | 1               |                           |
| CNVcluster_1119 | 7   | 90869279  | 90878664  | 9386   | 1   | 464             | 1               | 0               | 0               | 0               | 1               |                           |
| CNVcluster_1121 | 7   | 109221035 | 109241219 | 20185  | 2   | 461             | 3               | 0               | 0               | 1               | 1               |                           |
| CNVcluster_1125 | 7   | 132494591 | 132499228 | 4638   | 1   | 457             | 8               | 0               | 0               | 1               | 0               |                           |
| CNVcluster_1126 | 7   | 132558271 | 132558334 | 64     | 1   | 455             | 10              | 0               | 0               | 1               | 0               |                           |
| CNVcluster_1127 | 7   | 133435718 | 133449099 | 13382  | 2   | 453             | 11              | 0               | 0               | 0               | 2               |                           |
| CNVcluster_1128 | 7   | 141416113 | 141438577 | 22465  | 3   | 461             | 2               | 0               | 0               | 0               | 3               |                           |

| Cluster_ID      | Chr | Start     | End       | Size   | HDs | n <sub>WW</sub> | n <sub>WL</sub> | n <sub>WS</sub> | n <sub>LL</sub> | n <sub>LS</sub> | n <sub>SS</sub> | genes                                                                                                     |
|-----------------|-----|-----------|-----------|--------|-----|-----------------|-----------------|-----------------|-----------------|-----------------|-----------------|-----------------------------------------------------------------------------------------------------------|
| CNVcluster_1129 | 7   | 141693869 | 141715789 | 21921  | 4   | 427             | 2               | 33              | 0               | 1               | 3               |                                                                                                           |
| CNVcluster_1130 | 7   | 142019178 | 142203713 | 184536 | 26  | 428             | 2               | 10              | 0               | 2               | 24              | NR_001296.2(26) PRSS2(3)                                                                                  |
| CNVcluster_1131 | 7   | 154515787 | 154520478 | 4692   | 1   | 458             | 2               | 5               | 0               | 0               | 1               |                                                                                                           |
| CNVcluster_1132 | 7   | 158133036 | 158133679 | 644    | 1   | 459             | 2               | 4               | 0               | 0               | 1               |                                                                                                           |
| CNVcluster_1135 | 8   | 3475054   | 3475452   | 399    | 1   | 460             | 1               | 4               | 0               | 0               | 1               |                                                                                                           |
| CNVcluster_1139 | 8   | 7181232   | 7836262   | 655031 | 1   | 419             | 6               | 40              | 0               | 0               | 1               | ENSG00000206032(1) ENSG00000215372(1) ENSG00000215371(1) BD02_HUMAN(1) DEFB103B(1) SPAG11B(1) DEFB104B(1) |
| CNVcluster_1141 | 8   | 8046615   | 8055343   | 8729   | 1   | 454             | 7               | 4               | 0               | 0               | 1               |                                                                                                           |
| CNVcluster_1143 | 8   | 9433870   | 9434059   | 190    | 1   | 458             | 3               | 4               | 0               | 0               | 1               |                                                                                                           |
| CNVcluster_1146 | 8   | 13643473  | 13652680  | 9208   | 1   | 459             | 3               | 3               | 0               | 0               | 1               |                                                                                                           |
| CNVcluster_1147 | 8   | 13659089  | 13696094  | 37006  | 1   | 437             | 3               | 25              | 0               | 0               | 1               |                                                                                                           |
| CNVcluster_1148 | 8   | 16306607  | 16319033  | 12427  | 1   | 456             | 6               | 3               | 0               | 0               | 1               |                                                                                                           |
| CNVcluster_1150 | 8   | 25030361  | 25040250  | 9890   | 2   | 461             | 3               | 0               | 0               | 0               | 2               |                                                                                                           |
| CNVcluster_1151 | 8   | 39345507  | 39517147  | 171641 | 51  | 376             | 1               | 38              | 0               | 1               | 50              | ADAM5P(51) ENSG00000197475(51)                                                                            |
| CNVcluster_1152 | 8   | 40302955  | 40312067  | 9113   | 1   | 459             | 2               | 4               | 0               | 0               | 1               |                                                                                                           |
| CNVcluster_1153 | 8   | 61161284  | 61170324  | 9041   | 1   | 460             | 4               | 1               | 0               | 0               | 1               |                                                                                                           |
| CNVcluster_1154 | 8   | 78831712  | 78831991  | 280    | 1   | 450             | 15              | 0               | 0               | 0               | 1               |                                                                                                           |
| CNVcluster_1156 | 8   | 104147493 | 104147879 | 387    | 1   | 464             | 1               | 0               | 0               | 1               | 0               | ATP6V1C1(1)                                                                                               |
| CNVcluster_1157 | 8   | 112363456 | 112369457 | 6002   | 2   | 446             | 18              | 0               | 0               | 2               | 0               |                                                                                                           |
| CNVcluster_1158 | 8   | 115703664 | 115710908 | 7245   | 5   | 458             | 3               | 0               | 0               | 2               | 3               |                                                                                                           |
| CNVcluster_1160 | 8   | 120781781 | 120781792 | 12     | 1   | 458             | 6               | 1               | 0               | 0               | 1               |                                                                                                           |
| CNVcluster_1162 | 8   | 136203239 | 136203860 | 622    | 1   | 465             | 0               | 0               | 0               | 1               | 0               |                                                                                                           |
| CNVcluster_1167 | 9   | 581610    | 598622    | 17013  | 1   | 454             | 0               | 11              | 0               | 0               | 1               |                                                                                                           |
| CNVcluster_1170 | 9   | 10536814  | 10577693  | 40880  | 1   | 463             | 0               | 2               | 0               | 1               | 0               |                                                                                                           |
| CNVcluster_1180 | 9   | 93442090  | 93443367  | 1278   | 1   | 458             | 7               | 0               | 0               | 1               | 0               |                                                                                                           |
| CNVcluster_1181 | 9   | 103754749 | 103762240 | 7492   | 1   | 462             | 3               | 0               | 0               | 0               | 1               |                                                                                                           |
| CNVcluster_1184 | 10  | 1892085   | 1892670   | 586    | 1   | 461             | 4               | 0               | 0               | 1               | 0               |                                                                                                           |
| CNVcluster_1188 | 10  | 46111165  | 46839718  | 728554 | 1   | 456             | 3               | 6               | 0               | 1               | 0               |                                                                                                           |
| CNVcluster_1192 | 10  | 58572176  | 58606915  | 34740  | 1   | 447             | 14              | 4               | 0               | 1               | 0               |                                                                                                           |
| CNVcluster_1193 | 10  | 59242015  | 59441474  | 199460 | 1   | 453             | 12              | 0               | 0               | 1               | 0               |                                                                                                           |
| CNVcluster_1194 | 10  | 66977930  | 66992933  | 15004  | 1   | 459             | 5               | 1               | 0               | 1               | 0               |                                                                                                           |
| CNVcluster_1196 | 10  | 81475460  | 81587760  | 112301 | 1   | 462             | 1               | 2               | 0               | 1               | 0               |                                                                                                           |
| CNVcluster_1198 | 11  | 4195631   | 4284749   | 89119  | 2   | 458             | 5               | 1               | 0               | 0               | 2               | ENSG00000186223(1)                                                                                        |
| CNVcluster_1199 | 11  | 4924227   | 4933469   | 9243   | 11  | 439             | 2               | 14              | 0               | 1               | 10              | OR51A4(1) OR51A2(9)                                                                                       |
| CNVcluster_1200 | 11  | 5740500   | 5766038   | 25539  | 9   | 455             | 2               | 0               | 0               | 0               | 9               | OR52N5(9) OR52N1(9)                                                                                       |
| CNVcluster_1202 | 11  | 18897433  | 18918499  | 21067  | 1   | 443             | 2               | 20              | 0               | 0               | 1               | MRGPRX1(1)                                                                                                |
| CNVcluster_1205 | 11  | 49809992  | 49810113  | 122    | 1   | 393             | 72              | 0               | 0               | 1               | 0               |                                                                                                           |
| CNVcluster_1207 | 11  | 55119917  | 55210153  | 90237  | 28  | 393             | 40              | 5               | 0               | 23              | 5               | OR4C11(1) OR4P4(28) OR4S2(28) OR4C6(28) Q8NH71_HUMAN(3)                                                   |
| CNVcluster_1210 | 11  | 76932197  | 76932954  | 758    | 1   | 459             | 6               | 0               | 0               | 1               | 0               |                                                                                                           |
| CNVcluster_1218 | 12  | 9525138   | 9626238   | 101101 | 7   | 447             | 1               | 11              | 0               | 0               | 7               | Q6IE37_HUMAN(7) ENSG00000139088(7)                                                                        |
| CNVcluster_1221 | 12  | 30126688  | 30135201  | 8514   | 6   | 453             | 1               | 6               | 0               | 0               | 6               |                                                                                                           |
| CNVcluster_1222 | 12  | 33191058  | 33198642  | 7585   | 9   | 423             | 34              | 0               | 0               | 4               | 5               |                                                                                                           |
| CNVcluster_1225 | 12  | 82687422  | 82689373  | 1952   | 1   | 457             | 7               | 1               | 0               | 1               | 0               |                                                                                                           |

| Cluster_ID      | Chr | Start     | End       | Size    | HDs | n <sub>WW</sub> | n <sub>WL</sub> | n <sub>WS</sub> | n <sub>LL</sub> | n <sub>LS</sub> | n <sub>SS</sub> | genes                                                                                   |
|-----------------|-----|-----------|-----------|---------|-----|-----------------|-----------------|-----------------|-----------------|-----------------|-----------------|-----------------------------------------------------------------------------------------|
| CNVcluster_1226 | 12  | 89015801  | 89016206  | 406     | 1   | 464             | 1               | 0               | 0               | 1               | 0               |                                                                                         |
| CNVcluster_1231 | 13  | 31430122  | 31436424  | 6303    | 1   | 463             | 2               | 0               | 0               | 0               | 1               |                                                                                         |
| CNVcluster_1232 | 13  | 36969135  | 37013110  | 43976   | 1   | 462             | 2               | 1               | 0               | 0               | 1               |                                                                                         |
| CNVcluster_1233 | 13  | 56610801  | 56721045  | 110245  | 20  | 434             | 9               | 3               | 0               | 4               | 16              |                                                                                         |
| CNVcluster_1237 | 13  | 68146300  | 68166244  | 19945   | 1   | 461             | 3               | 1               | 0               | 1               | 0               |                                                                                         |
| CNVcluster_1246 | 14  | 39683674  | 39686671  | 2998    | 1   | 451             | 14              | 0               | 0               | 1               | 0               |                                                                                         |
| CNVcluster_1247 | 14  | 40680247  | 40727100  | 46854   | 6   | 447             | 12              | 1               | 0               | 5               | 1               |                                                                                         |
| CNVcluster_1251 | 14  | 105149735 | 106162835 | 1013101 | 114 | 278             | 9               | 84              | 0               | 18              | 77              | ENSG00000214398(5) Q86TT0_HUMAN(5)                                                      |
| CNVcluster_1257 | 15  | 22225845  | 22276387  | 50543   | 1   | 455             | 4               | 6               | 0               | 0               | 1               |                                                                                         |
| CNVcluster_1260 | 15  | 32481929  | 32645303  | 163375  | 6   | 418             | 2               | 40              | 0               | 0               | 6               | GOLGA8B(1)                                                                              |
| CNVcluster_1262 | 15  | 51572332  | 51572572  | 241     | 1   | 462             | 2               | 1               | 0               | 1               | 0               |                                                                                         |
| CNVcluster_1263 | 15  | 54577996  | 54588270  | 10275   | 2   | 462             | 1               | 1               | 0               | 0               | 2               |                                                                                         |
| CNVcluster_1264 | 15  | 74678297  | 74682831  | 4535    | 7   | 450             | 8               | 1               | 0               | 7               | 0               |                                                                                         |
| CNVcluster_1271 | 16  | 19853152  | 19874864  | 21713   | 1   | 464             | 1               | 0               | 0               | 0               | 1               |                                                                                         |
| CNVcluster_1272 | 16  | 33277266  | 33683587  | 406322  | 2   | 434             | 21              | 9               | 0               | 2               | 0               | ENSG00000198229(1) ENSG00000205454(1)                                                   |
| CNVcluster_1273 | 16  | 54350580  | 54379946  | 29367   | 5   | 457             | 3               | 1               | 0               | 2               | 3               | NR_003276.1(5)                                                                          |
| CNVcluster_1275 | 16  | 76929942  | 76942267  | 12326   | 2   | 458             | 3               | 3               | 0               | 1               | 1               | WWOX(1)                                                                                 |
| CNVcluster_1276 | 16  | 77327935  | 77360622  | 32688   | 1   | 461             | 3               | 1               | 0               | 1               | 0               | WWOX(1)                                                                                 |
| CNVcluster_1280 | 17  | 14984652  | 14995228  | 10577   | 2   | 464             | 0               | 0               | 0               | 0               | 2               |                                                                                         |
| CNVcluster_1281 | 17  | 18296118  | 18409923  | 113806  | 4   | 457             | 2               | 3               | 0               | 2               | 2               | NP_001035167.2(4) NOS2B(4) ENSG00000188933(4)                                           |
| CNVcluster_1284 | 17  | 36675235  | 36684058  | 8824    | 1   | 430             | 4               | 31              | 0               | 0               | 1               |                                                                                         |
| CNVcluster_1286 | 17  | 40941540  | 41011471  | 69932   | 4   | 454             | 7               | 1               | 0               | 3               | 1               | Q32Q44_HUMAN(3) ENSG00000131484(3) NR_002940.1(3) Q9NWC8_HUMAN(3)                       |
| CNVcluster_1289 | 18  | 36514419  | 36523810  | 9392    | 3   | 461             | 2               | 0               | 0               | 1               | 2               |                                                                                         |
| CNVcluster_1290 | 18  | 38310568  | 38311766  | 1199    | 4   | 461             | 1               | 0               | 0               | 1               | 3               |                                                                                         |
| CNVcluster_1294 | 18  | 64894326  | 64909247  | 14922   | 3   | 449             | 1               | 13              | 0               | 0               | 3               |                                                                                         |
| CNVcluster_1296 | 19  | 20379990  | 20513303  | 133314  | 5   | 417             | 5               | 39              | 0               | 0               | 5               |                                                                                         |
| CNVcluster_1297 | 19  | 40541334  | 40558627  | 17294   | 2   | 463             | 1               | 0               | 0               | 0               | 2               | FFAR3(2)                                                                                |
| CNVcluster_1298 | 19  | 46040710  | 46072787  | 32078   | 2   | 462             | 2               | 0               | 0               | 0               | 2               | CYP2A6(2)                                                                               |
| CNVcluster_1299 | 19  | 47980109  | 48534759  | 554651  | 5   | 446             | 0               | 15              | 0               | 1               | 4               | PSG6(1)                                                                                 |
| CNVcluster_1302 | 20  | 1505191   | 1545947   | 40757   | 4   | 417             | 2               | 43              | 0               | 0               | 4               | SIRPB1(1)                                                                               |
| CNVcluster_1306 | 20  | 62386513  | 62426598  | 40086   | 3   | 455             | 2               | 6               | 0               | 0               | 3               | PCMTD2(1) C6orf88(1)                                                                    |
| CNVcluster_1308 | 21  | 22577635  | 22586529  | 8895    | 1   | 463             | 2               | 0               | 0               | 0               | 1               |                                                                                         |
| CNVcluster_1309 | 21  | 23345177  | 23355928  | 10752   | 1   | 461             | 2               | 2               | 0               | 1               | 0               |                                                                                         |
| CNVcluster_1310 | 21  | 28964598  | 28964759  | 162     | 1   | 438             | 23              | 4               | 0               | 0               | 1               |                                                                                         |
| CNVcluster_1312 | 22  | 20899640  | 21585556  | 685917  | 30  | 391             | 1               | 45              | 0               | 2               | 27              | VPREB1(1) ENSG00000198312(1) SUHW2(12) SUHW1(12) PRAME(12) ENSG00000215481(12) GGT4(12) |
| CNVcluster_1315 | 22  | 37693566  | 37719652  | 26087   | 1   | 459             | 5               | 1               | 0               | 0               | 1               |                                                                                         |

The deletion profiles for the CNP clusters containing homozygous deletions within the 466 control DNAs are presented. The genomic location of the cluster (chromosomal origin, start (5') and end (3')) and total number of homozygous deletions within the cluster is given. Six possible

deletion patterns can result from small and large scale deletions (Figure 3): WW – wild type copies of both parental chromosomes, WL – one wild type and one large scale CNP (deletion >1MB), WS - one wild type and one small scale CNP (deletion <1Mb), LL – two overlapping large scale CNPs, LS - one large scale and overlapping small scale CNP, SS – two overlapping small scale CNPs. LS, SS and LL result in a homozygous deletion. Genes with coding sequence present within homozygous deletions resulting from two overlapping CNPs are given together with the number of samples affecting the gene in brackets.

**Supplementary Table 7.** Homozygous deletion clusters across the series of 746 cancer cell lines.

| Loci          | Type        | Chr | Cluster Position/information |           |     | Deepest 100kb window location and deletion patterns |           |                 |                 |                 |                 |                 |                 |     | HD Selection Pressure ( $\lambda$ ) | Small Deletion Rate ( $\bar{p}_s$ ,%) |
|---------------|-------------|-----|------------------------------|-----------|-----|-----------------------------------------------------|-----------|-----------------|-----------------|-----------------|-----------------|-----------------|-----------------|-----|-------------------------------------|---------------------------------------|
|               |             |     | 5'                           | 3'        | HDs | 5'                                                  | 3'        | n <sub>WW</sub> | n <sub>WL</sub> | n <sub>WS</sub> | n <sub>LL</sub> | n <sub>LS</sub> | n <sub>SS</sub> | HDs |                                     |                                       |
| Chr1:5Mb      | Unexplained | 1   | 3098629                      | 5947168   | 5   | 3703793                                             | 3803793   | 511             | 230             | 1               | 2               | 2               | 0               | 4   | 4.3                                 | 0.07                                  |
| Chr1:8Mb      | Unexplained | 1   | 6843093                      | 9540699   | 10  | 8627465                                             | 8727465   | 521             | 222             | 0               | 1               | 2               | 0               | 3   | 7.6                                 | 0.03                                  |
| Chr1:10Mb     | Unexplained | 1   | 10029362                     | 10546623  | 2   | 10444897                                            | 10544897  | 527             | 215             | 2               | 0               | 2               | 0               | 2   | 1.6                                 | 0.19                                  |
| Chr1:11Mb     | Unexplained | 1   | 10702796                     | 10877203  | 1   | 10740000                                            | 10840000  | 531             | 214             | 0               | 0               | 1               | 0               | 1   | 2.5                                 | 0                                     |
| Chr1:12Mb     | Unexplained | 1   | 11796339                     | 11809890  | 1   | 11753115                                            | 11853115  | 530             | 214             | 1               | 0               | 1               | 0               | 1   | 1.7                                 | 0.06                                  |
| Chr1:13Mb     | Unexplained | 1   | 12775335                     | 12920855  | 1   | 12798095                                            | 12898095  | 533             | 211             | 1               | 0               | 1               | 0               | 1   | 1.6                                 | 0.06                                  |
| Chr1:16Mb     | Unexplained | 1   | 16348004                     | 16387073  | 1   | 16317539                                            | 16417539  | 531             | 214             | 0               | 0               | 0               | 1               | 1   | 2.4                                 | 0.01                                  |
| Chr1:17Mb     | Unexplained | 1   | 16890118                     | 16955000  | 1   | 16872559                                            | 16972559  | 531             | 209             | 5               | 0               | 1               | 0               | 1   | 0.6                                 | 0.41                                  |
| Chr1:17Mb     | Unexplained | 1   | 17358240                     | 17382532  | 1   | 17320386                                            | 17420386  | 525             | 216             | 4               | 0               | 1               | 0               | 1   | 0.7                                 | 0.32                                  |
| Chr1:19Mb     | Unexplained | 1   | 19268066                     | 19365294  | 1   | 19266680                                            | 19366680  | 530             | 214             | 1               | 0               | 1               | 0               | 1   | 1.7                                 | 0.06                                  |
| Chr1:23Mb     | Unexplained | 1   | 23234203                     | 23404496  | 1   | 23269350                                            | 23369350  | 531             | 213             | 1               | 0               | 1               | 0               | 1   | 1.6                                 | 0.06                                  |
| Chr1:27Mb     | Unexplained | 1   | 26898389                     | 27051816  | 2   | 26913595                                            | 27013595  | 527             | 217             | 0               | 0               | 2               | 0               | 2   | 3.7                                 | 0.04                                  |
| Chr1:31Mb     | Unexplained | 1   | 31373063                     | 31396255  | 2   | 31334659                                            | 31434659  | 559             | 184             | 1               | 0               | 2               | 0               | 2   | 2.3                                 | 0.11                                  |
| Chr1:38Mb     | Unexplained | 1   | 37617828                     | 37637718  | 1   | 37577773                                            | 37677773  | 590             | 155             | 0               | 0               | 1               | 0               | 1   | 2.4                                 | 0.01                                  |
| Chr1:41Mb     | Unexplained | 1   | 41042288                     | 41067001  | 1   | 41004645                                            | 41104645  | 608             | 137             | 0               | 0               | 1               | 0               | 1   | 2.6                                 | 0.01                                  |
| Chr1:49Mb     | Unexplained | 1   | 49107804                     | 49193417  | 1   | 49100611                                            | 49200611  | 593             | 147             | 5               | 0               | 1               | 0               | 1   | 0.7                                 | 0.41                                  |
| Chr1:49Mb     | Unexplained | 1   | 49400762                     | 49440618  | 1   | 49370690                                            | 49470690  | 591             | 150             | 4               | 0               | 0               | 1               | 1   | 0.9                                 | 0.32                                  |
| Chr1:50Mb     | Unexplained | 1   | 49634411                     | 49800398  | 4   | 49639187                                            | 49739187  | 590             | 148             | 4               | 0               | 3               | 1               | 4   | 1.9                                 | 0.42                                  |
| <i>CDKN2C</i> | Unexplained | 1   | 50373838                     | 51719090  | 15  | 51117537                                            | 51217537  | 585             | 144             | 4               | 0               | 8               | 5               | 13  | 5.7                                 | 0.54                                  |
| Chr1:57Mb     | Unexplained | 1   | 56930881                     | 56938733  | 1   | 56884807                                            | 56984807  | 612             | 133             | 0               | 0               | 0               | 1               | 1   | 2.5                                 | 0                                     |
| Chr1:59Mb     | Unexplained | 1   | 59012576                     | 59957925  | 1   | 59435251                                            | 59535251  | 612             | 133             | 0               | 0               | 1               | 0               | 1   | 2.4                                 | 0.01                                  |
| Chr1:68Mb     | Unexplained | 1   | 68310202                     | 68368933  | 1   | 68289568                                            | 68389568  | 606             | 138             | 1               | 0               | 1               | 0               | 1   | 1.7                                 | 0.07                                  |
| Chr1:72Mb     | Unexplained | 1   | 71772509                     | 72667050  | 8   | 72084798                                            | 72184798  | 586             | 145             | 9               | 0               | 2               | 4               | 6   | 1.6                                 | 0.91                                  |
| Chr1:73Mb     | Unexplained | 1   | 72784509                     | 72860746  | 1   | 72772628                                            | 72872628  | 582             | 158             | 5               | 0               | 1               | 0               | 1   | 0.7                                 | 0.41                                  |
| Chr1:75Mb     | Unexplained | 1   | 74308546                     | 75100460  | 3   | 74472363                                            | 74572363  | 600             | 144             | 1               | 0               | 1               | 0               | 1   | 1.7                                 | 0.06                                  |
| Chr1:84Mb     | Unexplained | 1   | 84462534                     | 84521313  | 1   | 84441924                                            | 84541924  | 593             | 151             | 1               | 0               | 1               | 0               | 1   | 1.7                                 | 0.08                                  |
| Chr1:92Mb     | Unexplained | 1   | 91691813                     | 91692370  | 1   | 91642092                                            | 91742092  | 603             | 142             | 0               | 0               | 1               | 0               | 1   | 2.5                                 | 0.01                                  |
| Chr1:97Mb     | Unexplained | 1   | 97360274                     | 97380699  | 1   | 97320487                                            | 97420487  | 610             | 134             | 1               | 0               | 1               | 0               | 1   | 1.7                                 | 0.07                                  |
| Chr1:108Mb    | Unexplained | 1   | 107618378                    | 107622430 | 1   | 107570404                                           | 107670404 | 609             | 135             | 1               | 0               | 1               | 0               | 1   | 1.7                                 | 0.07                                  |
| Chr1:118Mb    | Unexplained | 1   | 117922092                    | 117959602 | 1   | 117890847                                           | 117990847 | 611             | 133             | 1               | 0               | 1               | 0               | 1   | 1.7                                 | 0.07                                  |
| Chr1:121Mb    | Unexplained | 1   | 120857051                    | 121057405 | 1   | 120907228                                           | 121007228 | 628             | 116             | 1               | 0               | 1               | 0               | 1   | 1.8                                 | 0.07                                  |
| Chr1:158Mb    | Unexplained | 1   | 157602698                    | 158362249 | 1   | 157932474                                           | 158032474 | 661             | 83              | 1               | 0               | 1               | 0               | 1   | 1.9                                 | 0.07                                  |
| Chr1:160Mb    | Unexplained | 1   | 159662731                    | 159662767 | 1   | 159612749                                           | 159712749 | 661             | 82              | 2               | 0               | 1               | 0               | 1   | 1.4                                 | 0.14                                  |
| Chr1:173Mb    | Unexplained | 1   | 172465750                    | 172543735 | 1   | 172454743                                           | 172554743 | 627             | 116             | 2               | 0               | 0               | 1               | 1   | 1.3                                 | 0.15                                  |
| Chr1:177Mb    | Unexplained | 1   | 177319674                    | 177319674 | 1   | 172454743                                           | 172554743 | 627             | 116             | 2               | 0               | 0               | 1               | 1   | 1.3                                 | 0.14                                  |
| Chr1:180Mb    | Unexplained | 1   | 179779298                    | 179950151 | 1   | 179814725                                           | 179914725 | 640             | 101             | 4               | 0               | 1               | 0               | 1   | 1.0                                 | 0.31                                  |
| Chr1:186Mb    | Unexplained | 1   | 185779904                    | 186037673 | 1   | 185858789                                           | 185958789 | 640             | 103             | 2               | 0               | 1               | 0               | 1   | 1.3                                 | 0.15                                  |
| Chr1:188Mb    | Unexplained | 1   | 187516192                    | 187731903 | 1   | 187574048                                           | 187674048 | 613             | 121             | 11              | 0               | 0               | 1               | 1   | 0.5                                 | 0.96                                  |
| Chr1:191Mb    | Unexplained | 1   | 191196282                    | 191263874 | 1   | 191180078                                           | 191280078 | 640             | 100             | 5               | 0               | 0               | 1               | 1   | 0.8                                 | 0.4                                   |
| Chr1:200Mb    | Unexplained | 1   | 199911375                    | 200060063 | 1   | 199935719                                           | 200035719 | 638             | 104             | 3               | 0               | 1               | 0               | 1   | 1.1                                 | 0.22                                  |
| Chr1:207Mb    | Unexplained | 1   | 207284435                    | 207309693 | 1   | 207247064                                           | 207347064 | 633             | 112             | 0               | 0               | 1               | 0               | 1   | 2.6                                 | 0                                     |
| Chr1:210Mb    | Unexplained | 1   | 209578964                    | 209718808 | 1   | 209598886                                           | 209698886 | 620             | 122             | 3               | 0               | 1               | 0               | 1   | 1.1                                 | 0.23                                  |

| Loci         | Type        | Chr | Cluster Position/information |           |     | Deepest 100kb window location and deletion patterns |           |                 |                 |                 |                 |                 |                 |     | HD Selection Pressure ( $\lambda$ ) | Small Deletion Rate ( $\bar{p}_s$ , %) |
|--------------|-------------|-----|------------------------------|-----------|-----|-----------------------------------------------------|-----------|-----------------|-----------------|-----------------|-----------------|-----------------|-----------------|-----|-------------------------------------|----------------------------------------|
|              |             |     | 5'                           | 3'        | HDs | 5'                                                  | 3'        | n <sub>WW</sub> | n <sub>WL</sub> | n <sub>WS</sub> | n <sub>LL</sub> | n <sub>LS</sub> | n <sub>SS</sub> | HDs |                                     |                                        |
| Chr1:231Mb   | Unexplained | 1   | 231163726                    | 231361905 | 1   | 231212816                                           | 231312816 | 620             | 125             | 0               | 0               | 1               | 0               | 1   | 2.5                                 | 0.01                                   |
| Chr1:244Mb   | Unexplained | 1   | 243707102                    | 243796934 | 1   | 243702018                                           | 243802018 | 625             | 116             | 4               | 0               | 1               | 0               | 1   | 0.9                                 | 0.31                                   |
| Chr1:244Mb   | Unexplained | 1   | 243870301                    | 243893280 | 1   | 243831791                                           | 243931791 | 621             | 118             | 6               | 0               | 1               | 0               | 1   | 0.7                                 | 0.49                                   |
| Chr1:244Mb   | Unexplained | 1   | 244010619                    | 244171000 | 1   | 244040810                                           | 244140810 | 618             | 118             | 9               | 0               | 1               | 0               | 1   | 0.5                                 | 0.77                                   |
| Chr2:7Mb     | Unexplained | 2   | 7247844                      | 7276943   | 1   | 7212394                                             | 7312394   | 617             | 126             | 2               | 0               | 1               | 0               | 1   | 1.4                                 | 0.14                                   |
| Chr2:21Mb    | Unexplained | 2   | 20915398                     | 20923782  | 1   | 20869590                                            | 20969590  | 627             | 116             | 2               | 0               | 1               | 0               | 1   | 1.3                                 | 0.15                                   |
| Chr2:24Mb    | Unexplained | 2   | 24455016                     | 24464633  | 1   | 24409825                                            | 24509825  | 631             | 112             | 2               | 0               | 1               | 0               | 1   | 1.4                                 | 0.14                                   |
| Chr2:33Mb    | Unexplained | 2   | 33032785                     | 33088828  | 1   | 33010807                                            | 33110807  | 640             | 103             | 2               | 0               | 1               | 0               | 1   | 1.3                                 | 0.15                                   |
| Chr2:36Mb    | Unexplained | 2   | 35653641                     | 36577928  | 1   | 36065785                                            | 36165785  | 635             | 110             | 0               | 0               | 1               | 0               | 1   | 2.6                                 | 0.01                                   |
| Chr2:37Mb    | Unexplained | 2   | 37090330                     | 37109310  | 1   | 37049820                                            | 37149820  | 635             | 110             | 0               | 0               | 1               | 0               | 1   | 2.6                                 | 0.01                                   |
| Chr2:39Mb    | Unexplained | 2   | 39360833                     | 39581935  | 1   | 39421384                                            | 39521384  | 636             | 109             | 0               | 0               | 1               | 0               | 1   | 2.6                                 | 0                                      |
| Chr2:43Mb    | Unexplained | 2   | 42263104                     | 42742606  | 1   | 42452855                                            | 42552855  | 639             | 104             | 2               | 0               | 1               | 0               | 1   | 1.3                                 | 0.15                                   |
| Chr2:44Mb    | Unexplained | 2   | 44191258                     | 44233145  | 1   | 44162202                                            | 44262202  | 630             | 104             | 11              | 0               | 1               | 0               | 1   | 0.5                                 | 0.95                                   |
| Chr2:45Mb    | Unexplained | 2   | 44678225                     | 44818183  | 1   | 44698204                                            | 44798204  | 626             | 106             | 13              | 0               | 1               | 0               | 1   | 0.4                                 | 1.14                                   |
| Chr2:47Mb    | Unexplained | 2   | 46744042                     | 46784467  | 1   | 46714255                                            | 46814255  | 638             | 104             | 3               | 0               | 1               | 0               | 1   | 1.1                                 | 0.22                                   |
| <i>MSH2</i>  | RCG         | 2   | 47224899                     | 48358267  | 5   | 47475242                                            | 47575242  | 636             | 103             | 2               | 1               | 2               | 2               | 5   | 4.8                                 | 0.22                                   |
| Chr2:51Mb    | Unexplained | 2   | 50596953                     | 51030259  | 2   | 50895764                                            | 50995764  | 641             | 99              | 4               | 0               | 0               | 2               | 2   | 1.3                                 | 0.36                                   |
| Chr2:51Mb    | Unexplained | 2   | 51035262                     | 51070122  | 1   | 51002692                                            | 51102692  | 640             | 100             | 4               | 0               | 0               | 2               | 2   | 1.4                                 | 0.36                                   |
| Chr2:51Mb    | Unexplained | 2   | 51266489                     | 51461789  | 2   | 51356129                                            | 51456129  | 642             | 98              | 4               | 0               | 0               | 2               | 2   | 1.4                                 | 0.35                                   |
| Chr2:57Mb    | Unexplained | 2   | 56501012                     | 56510016  | 1   | 56455514                                            | 56555514  | 639             | 101             | 5               | 0               | 1               | 0               | 1   | 0.8                                 | 0.4                                    |
| Chr2:58Mb    | Unexplained | 2   | 58179071                     | 58321485  | 1   | 58200278                                            | 58300278  | 644             | 98              | 3               | 0               | 0               | 1               | 1   | 1.1                                 | 0.23                                   |
| Chr2:60Mb    | Unexplained | 2   | 59573438                     | 59594928  | 1   | 59534183                                            | 59634183  | 652             | 92              | 1               | 0               | 1               | 0               | 1   | 1.8                                 | 0.07                                   |
| Chr2:62Mb    | Unexplained | 2   | 62009461                     | 62144240  | 1   | 62026851                                            | 62126851  | 655             | 90              | 0               | 0               | 1               | 0               | 1   | 2.6                                 | 0.01                                   |
| Chr2:78Mb    | Unexplained | 2   | 77472841                     | 77775533  | 2   | 77587808                                            | 77687808  | 655             | 89              | 0               | 0               | 1               | 1               | 2   | 3.9                                 | 0.05                                   |
| Chr2:78Mb    | Unexplained | 2   | 77888028                     | 77979739  | 1   | 77883884                                            | 77983884  | 652             | 91              | 2               | 0               | 0               | 1               | 1   | 1.4                                 | 0.14                                   |
| Chr2:78Mb    | Unexplained | 2   | 78014075                     | 78331520  | 1   | 78122798                                            | 78222798  | 651             | 90              | 4               | 0               | 1               | 0               | 1   | 1.0                                 | 0.31                                   |
| Chr2:80Mb    | Unexplained | 2   | 79934690                     | 80348223  | 2   | 80072848                                            | 80172848  | 649             | 91              | 4               | 0               | 2               | 0               | 2   | 1.4                                 | 0.35                                   |
| Chr2:81Mb    | Unexplained | 2   | 80435102                     | 81460961  | 1   | 80898032                                            | 80998032  | 650             | 94              | 1               | 1               | 0               | 0               | 1   | 2.4                                 | 0.01                                   |
| Chr2:84Mb    | Unexplained | 2   | 82971184                     | 84601331  | 1   | 83736258                                            | 83836258  | 648             | 96              | 1               | 1               | 0               | 0               | 1   | 2.7                                 | 0.01                                   |
| Chr2:90Mb    | Unexplained | 2   | 89648440                     | 89696396  | 1   | 89622418                                            | 89722418  | 621             | 121             | 3               | 0               | 0               | 1               | 1   | 1.1                                 | 0.22                                   |
| Chr2:91Mb    | Unexplained | 2   | 91285533                     | 91651996  | 1   | 91418765                                            | 91518765  | 633             | 112             | 0               | 0               | 1               | 0               | 1   | 2.4                                 | 0                                      |
| Chr2:112Mb   | Unexplained | 2   | 111505062                    | 111667874 | 1   | 111536468                                           | 111636468 | 649             | 95              | 1               | 0               | 1               | 0               | 1   | 1.8                                 | 0.07                                   |
| Chr2:114Mb   | Unexplained | 2   | 113761852                    | 113884133 | 1   | 113772993                                           | 113872993 | 644             | 99              | 2               | 0               | 1               | 0               | 1   | 1.4                                 | 0.14                                   |
| Chr2:114Mb   | Unexplained | 2   | 114146043                    | 114603953 | 1   | 114324998                                           | 114424998 | 645             | 98              | 2               | 0               | 1               | 0               | 1   | 1.3                                 | 0.15                                   |
| Chr2:116Mb   | Unexplained | 2   | 115814609                    | 115848905 | 1   | 115781757                                           | 115881757 | 640             | 102             | 3               | 0               | 1               | 0               | 1   | 1.1                                 | 0.23                                   |
| Chr2:116Mb   | Unexplained | 2   | 116186438                    | 116186751 | 1   | 116136595                                           | 116236595 | 639             | 104             | 2               | 0               | 1               | 0               | 1   | 1.3                                 | 0.15                                   |
| Chr2:133Mb   | Unexplained | 2   | 133327499                    | 133359004 | 1   | 133293252                                           | 133393252 | 629             | 112             | 4               | 0               | 0               | 1               | 1   | 0.9                                 | 0.32                                   |
| Chr2:134Mb   | Unexplained | 2   | 133580922                    | 133691092 | 2   | 133575541                                           | 133675541 | 631             | 111             | 2               | 0               | 0               | 2               | 2   | 2.0                                 | 0.19                                   |
| Chr2:134Mb   | Unexplained | 2   | 133877756                    | 134006444 | 1   | 133892100                                           | 133992100 | 628             | 111             | 6               | 0               | 0               | 1               | 1   | 0.7                                 | 0.49                                   |
| Chr2:135Mb   | Unexplained | 2   | 134700240                    | 134729894 | 1   | 134665067                                           | 134765067 | 623             | 121             | 1               | 0               | 0               | 1               | 1   | 1.7                                 | 0.07                                   |
| Chr2:137Mb   | Unexplained | 2   | 136826837                    | 136827049 | 1   | 136776943                                           | 136876943 | 602             | 139             | 4               | 0               | 0               | 1               | 1   | 0.8                                 | 0.32                                   |
| <i>FRA2F</i> | FRA         | 2   | 141028685                    | 142392588 | 36  | 141612900                                           | 141712900 | 583             | 107             | 32              | 1               | 15              | 8               | 24  | 2.0                                 | 3.24                                   |
| Chr2:145Mb   | Unexplained | 2   | 142472627                    | 148399777 | 2   | 144615673                                           | 144715673 | 630             | 113             | 1               | 1               | 1               | 0               | 2   | 3.6                                 | 0.05                                   |
| Chr2:149Mb   | Unexplained | 2   | 148803089                    | 148925663 | 1   | 148814376                                           | 148914376 | 618             | 123             | 4               | 0               | 0               | 1               | 1   | 0.9                                 | 0.31                                   |

| Loci         | Type        | Chr | Cluster Position/information |           |     | Deepest 100kb window location and deletion patterns |           |                 |                 |                 |                 |                 |                 |     | HD Selection Pressure ( $\lambda$ ) | Small Deletion Rate ( $\bar{p}_s$ , %) |
|--------------|-------------|-----|------------------------------|-----------|-----|-----------------------------------------------------|-----------|-----------------|-----------------|-----------------|-----------------|-----------------|-----------------|-----|-------------------------------------|----------------------------------------|
|              |             |     | 5'                           | 3'        | HDs | 5'                                                  | 3'        | n <sub>WW</sub> | n <sub>WL</sub> | n <sub>WS</sub> | n <sub>LL</sub> | n <sub>LS</sub> | n <sub>SS</sub> | HDs |                                     |                                        |
| Chr2:150Mb   | Unexplained | 2   | 149579353                    | 149748529 | 1   | 149613941                                           | 149713941 | 622             | 123             | 0               | 0               | 1               | 0               | 1   | 2.6                                 | 0                                      |
| Chr2:154Mb   | Unexplained | 2   | 153898443                    | 154029900 | 1   | 153914172                                           | 154014172 | 623             | 119             | 3               | 0               | 0               | 1               | 1   | 1.1                                 | 0.23                                   |
| Chr2:158Mb   | Unexplained | 2   | 154446555                    | 161523448 | 4   | 158005770                                           | 158105770 | 631             | 112             | 2               | 1               | 0               | 0               | 1   | 1.6                                 | 0.07                                   |
| Chr2:165Mb   | Unexplained | 2   | 163054809                    | 166800179 | 5   | 165944924                                           | 166044924 | 634             | 108             | 2               | 2               | 0               | 0               | 2   | 1.6                                 | 0.07                                   |
| Chr2:169Mb   | Unexplained | 2   | 168817178                    | 168985990 | 1   | 168851584                                           | 168951584 | 633             | 109             | 3               | 0               | 1               | 0               | 1   | 1.1                                 | 0.23                                   |
| Chr2:187Mb   | Unexplained | 2   | 186912372                    | 187175995 | 1   | 186994184                                           | 187094184 | 610             | 125             | 10              | 0               | 1               | 0               | 1   | 0.5                                 | 0.86                                   |
| Chr2:187Mb   | Unexplained | 2   | 187222852                    | 187354879 | 1   | 187238866                                           | 187338866 | 618             | 124             | 3               | 0               | 1               | 0               | 1   | 1.1                                 | 0.23                                   |
| Chr2:200Mb   | Unexplained | 2   | 199843078                    | 200045024 | 1   | 199894051                                           | 199994051 | 633             | 110             | 2               | 0               | 1               | 0               | 1   | 1.3                                 | 0.15                                   |
| Chr2:206Mb   | Unexplained | 2   | 205213593                    | 205816999 | 2   | 205613131                                           | 205713131 | 615             | 123             | 6               | 0               | 2               | 0               | 2   | 1.0                                 | 0.53                                   |
| Chr2:208Mb   | Unexplained | 2   | 207747868                    | 208037134 | 1   | 207842501                                           | 207942501 | 621             | 121             | 3               | 0               | 1               | 0               | 1   | 1.1                                 | 0.23                                   |
| Chr2:213Mb   | Unexplained | 2   | 212565101                    | 212571681 | 1   | 212518391                                           | 212618391 | 617             | 123             | 5               | 0               | 1               | 0               | 1   | 0.8                                 | 0.4                                    |
| Chr2:213Mb   | Unexplained | 2   | 212778696                    | 212811966 | 1   | 212745331                                           | 212845331 | 614             | 124             | 7               | 0               | 0               | 1               | 1   | 0.6                                 | 0.59                                   |
| Chr2:213Mb   | Unexplained | 2   | 212889568                    | 212979704 | 1   | 212884636                                           | 212984636 | 612             | 124             | 9               | 0               | 0               | 1               | 1   | 0.5                                 | 0.78                                   |
| Chr2:230Mb   | Unexplained | 2   | 229583863                    | 229737697 | 1   | 229610780                                           | 229710780 | 608             | 137             | 0               | 0               | 1               | 0               | 1   | 2.7                                 | 0.01                                   |
| Chr2:230Mb   | Unexplained | 2   | 229836999                    | 230090868 | 1   | 229913934                                           | 230013934 | 608             | 136             | 1               | 0               | 1               | 0               | 1   | 1.7                                 | 0.07                                   |
| Chr2:230Mb   | Unexplained | 2   | 230251676                    | 230658011 | 1   | 230404844                                           | 230504844 | 608             | 136             | 1               | 0               | 1               | 0               | 1   | 1.7                                 | 0.07                                   |
| Chr2:233Mb   | Unexplained | 2   | 233408776                    | 233513743 | 1   | 233411260                                           | 233511260 | 604             | 140             | 1               | 0               | 1               | 0               | 1   | 1.8                                 | 0.07                                   |
| Chr2:234Mb   | Unexplained | 2   | 233534870                    | 233572713 | 1   | 233503792                                           | 233603792 | 604             | 140             | 1               | 0               | 1               | 0               | 1   | 1.7                                 | 0.07                                   |
| Chr2:236Mb   | Unexplained | 2   | 236205656                    | 236467669 | 1   | 236286663                                           | 236386663 | 601             | 139             | 5               | 0               | 1               | 0               | 1   | 0.8                                 | 0.4                                    |
| Chr2:237Mb   | Unexplained | 2   | 236641783                    | 236955732 | 1   | 236748758                                           | 236848758 | 600             | 140             | 5               | 0               | 1               | 0               | 1   | 0.7                                 | 0.41                                   |
| Chr2:238Mb   | Unexplained | 2   | 238214950                    | 238326450 | 1   | 238220700                                           | 238320700 | 603             | 141             | 1               | 0               | 1               | 0               | 1   | 1.8                                 | 0.07                                   |
| Chr2:240Mb   | Unexplained | 2   | 239709986                    | 239994583 | 3   | 239836436                                           | 239936436 | 598             | 145             | 0               | 0               | 3               | 0               | 3   | 4.7                                 | 0.08                                   |
| Chr2:243Mb   | Unexplained | 2   | 242628620                    | 242738130 | 1   | 242633375                                           | 242733375 | 591             | 148             | 6               | 0               | 1               | 0               | 1   | 0.7                                 | 0.49                                   |
| Chr3:1Mb     | Unexplained | 3   | 715488                       | 823802    | 1   | 719645                                              | 819645    | 457             | 288             | 0               | 0               | 1               | 0               | 1   | 2.6                                 | 0                                      |
| Chr3:2Mb     | Unexplained | 3   | 1756414                      | 1834232   | 1   | 1745323                                             | 1845323   | 453             | 290             | 2               | 0               | 1               | 0               | 1   | 1.1                                 | 0.13                                   |
| Chr3:3Mb     | Unexplained | 3   | 2567979                      | 2932425   | 1   | 2700202                                             | 2800202   | 452             | 292             | 1               | 0               | 1               | 0               | 1   | 1.5                                 | 0.06                                   |
| Chr3:3Mb     | Unexplained | 3   | 2962987                      | 2976085   | 1   | 2919536                                             | 3019536   | 453             | 292             | 0               | 0               | 1               | 0               | 1   | 2.4                                 | 0.01                                   |
| Chr3:4Mb     | Unexplained | 3   | 3637149                      | 4044826   | 1   | 3790988                                             | 3890988   | 453             | 287             | 5               | 0               | 1               | 0               | 1   | 0.6                                 | 0.4                                    |
| Chr3:4Mb     | Unexplained | 3   | 4071644                      | 4142289   | 1   | 4056967                                             | 4156967   | 447             | 286             | 12              | 0               | 1               | 0               | 1   | 0.3                                 | 1.15                                   |
| Chr3:5Mb     | Unexplained | 3   | 4170683                      | 5012635   | 4   | 4188039                                             | 4288039   | 448             | 284             | 11              | 0               | 3               | 0               | 3   | 0.5                                 | 1.11                                   |
| Chr3:6Mb     | Unexplained | 3   | 6313515                      | 6333607   | 1   | 6273561                                             | 6373561   | 459             | 286             | 0               | 0               | 1               | 0               | 1   | 2.5                                 | 0                                      |
| Chr3:11Mb    | Unexplained | 3   | 10732162                     | 10776911  | 1   | 10704537                                            | 10804537  | 461             | 284             | 0               | 0               | 1               | 0               | 1   | 2.5                                 | 0                                      |
| Chr3:13Mb    | Unexplained | 3   | 12942462                     | 13022602  | 1   | 12932532                                            | 13032532  | 460             | 284             | 1               | 0               | 1               | 0               | 1   | 1.4                                 | 0.06                                   |
| Chr3:18Mb    | Unexplained | 3   | 17431240                     | 17700218  | 1   | 17515729                                            | 17615729  | 450             | 292             | 3               | 0               | 1               | 0               | 1   | 0.8                                 | 0.23                                   |
| Chr3:22Mb    | Unexplained | 3   | 20219218                     | 22885441  | 4   | 20835774                                            | 20935774  | 451             | 292             | 0               | 1               | 2               | 0               | 3   | 6.8                                 | 0.03                                   |
| Chr3:23Mb    | Unexplained | 3   | 23236338                     | 23328861  | 1   | 23232600                                            | 23332600  | 450             | 295             | 0               | 0               | 1               | 0               | 1   | 2.5                                 | 0                                      |
| Chr3:26Mb    | Unexplained | 3   | 25634972                     | 25678644  | 1   | 25606808                                            | 25706808  | 451             | 293             | 1               | 0               | 1               | 0               | 1   | 1.6                                 | 0.06                                   |
| Chr3:26Mb    | Unexplained | 3   | 26207867                     | 26216117  | 1   | 26161992                                            | 26261992  | 452             | 292             | 1               | 0               | 1               | 0               | 1   | 1.4                                 | 0.07                                   |
| Chr3:27Mb    | Unexplained | 3   | 26586502                     | 26586890  | 1   | 26536696                                            | 26636696  | 452             | 292             | 1               | 0               | 1               | 0               | 1   | 1.5                                 | 0.06                                   |
| <i>TGFR2</i> | Unexplained | 3   | 27522138                     | 31464690  | 13  | 30626180                                            | 30726180  | 454             | 284             | 0               | 2               | 6               | 0               | 8   | 9.8                                 | 0.09                                   |
| Chr3:32Mb    | Unexplained | 3   | 31876005                     | 32046043  | 1   | 31911024                                            | 32011024  | 454             | 290             | 1               | 0               | 1               | 0               | 1   | 1.5                                 | 0.06                                   |
| Chr3:33Mb    | Unexplained | 3   | 32472346                     | 33017605  | 1   | 32694976                                            | 32794976  | 455             | 290             | 0               | 0               | 1               | 0               | 1   | 2.5                                 | 0                                      |
| <i>MLH1</i>  | RCG         | 3   | 33916289                     | 38634279  | 4   | 36838623                                            | 36938623  | 448             | 294             | 3               | 1               | 0               | 0               | 1   | 0.9                                 | 0.14                                   |
| Chr3:41Mb    | Unexplained | 3   | 41230228                     | 41597107  | 3   | 41310470                                            | 41410470  | 445             | 297             | 1               | 0               | 3               | 0               | 3   | 2.5                                 | 0.13                                   |

| Loci       | Type        | Chr | Cluster Position/information |           |     | Deepest 100kb window location and deletion patterns |           |                 |                 |                 |                 |                 |                 |     | HD Selection Pressure ( $\lambda$ ) | Small Deletion Rate ( $\bar{p}_s$ , %) |
|------------|-------------|-----|------------------------------|-----------|-----|-----------------------------------------------------|-----------|-----------------|-----------------|-----------------|-----------------|-----------------|-----------------|-----|-------------------------------------|----------------------------------------|
|            |             |     | 5'                           | 3'        | HDs | 5'                                                  | 3'        | n <sub>WW</sub> | n <sub>WL</sub> | n <sub>WS</sub> | n <sub>LL</sub> | n <sub>LS</sub> | n <sub>SS</sub> | HDs |                                     |                                        |
| Chr3:48Mb  | Unexplained | 3   | 47695112                     | 47837584  | 1   | 47716348                                            | 47816348  | 423             | 321             | 1               | 0               | 1               | 0               | 1   | 1.5                                 | 0.06                                   |
| Chr3:51Mb  | Unexplained | 3   | 50028514                     | 51051868  | 1   | 50490191                                            | 50590191  | 414             | 330             | 1               | 1               | 0               | 0               | 1   | 2.4                                 | 0                                      |
| Chr3:53Mb  | Unexplained | 3   | 52581257                     | 52636697  | 1   | 52558977                                            | 52658977  | 420             | 325             | 0               | 0               | 1               | 0               | 1   | 2.6                                 | 0                                      |
| Chr3:56Mb  | Unexplained | 3   | 54364155                     | 57499531  | 4   | 55740751                                            | 55840751  | 435             | 308             | 2               | 1               | 0               | 0               | 1   | 1.3                                 | 0.06                                   |
| FRA3B      | FRA         | 3   | 59659649                     | 59662653  | 1   | 59611151                                            | 59711151  | 435             | 307             | 3               | 0               | 1               | 0               | 1   | 0.7                                 | 0.22                                   |
| FRA3B      | FRA         | 3   | 59724013                     | 60081031  | 4   | 59964983                                            | 60064983  | 419             | 305             | 18              | 0               | 3               | 1               | 4   | 0.3                                 | 1.94                                   |
| FRA3B      | FRA         | 3   | 60136156                     | 61249601  | 90  | 60431324                                            | 60531324  | 379             | 282             | 34              | 0               | 27              | 24              | 51  | 1.6                                 | 4.46                                   |
| FRA3B      | FRA         | 3   | 61605942                     | 62233842  | 4   | 61797684                                            | 61897684  | 434             | 303             | 6               | 0               | 3               | 0               | 3   | 0.7                                 | 0.59                                   |
| Chr3:64Mb  | Unexplained | 3   | 63693580                     | 63743910  | 1   | 63668745                                            | 63768745  | 445             | 298             | 2               | 0               | 1               | 0               | 1   | 1.1                                 | 0.13                                   |
| Chr3:65Mb  | Unexplained | 3   | 64353586                     | 65716921  | 1   | 64985254                                            | 65085254  | 446             | 295             | 4               | 1               | 0               | 0               | 1   | 0.7                                 | 0.24                                   |
| Chr3:66Mb  | Unexplained | 3   | 65730291                     | 65897025  | 2   | 65746151                                            | 65846151  | 445             | 297             | 2               | 0               | 2               | 0               | 2   | 1.3                                 | 0.18                                   |
| Chr3:68Mb  | Unexplained | 3   | 68060674                     | 68171700  | 1   | 68066187                                            | 68166187  | 454             | 287             | 4               | 0               | 1               | 0               | 1   | 0.7                                 | 0.31                                   |
| Chr3:78Mb  | Unexplained | 3   | 69187442                     | 87263505  | 16  | 80525362                                            | 80625362  | 461             | 277             | 4               | 3               | 1               | 0               | 4   | 1.1                                 | 0.26                                   |
| Chr3:90Mb  | Unexplained | 3   | 88550349                     | 90585553  | 5   | 89406015                                            | 89506015  | 514             | 226             | 2               | 2               | 2               | 0               | 4   | 3.0                                 | 0.13                                   |
| Chr3:96Mb  | Unexplained | 3   | 95652227                     | 95727194  | 1   | 95639711                                            | 95739711  | 611             | 134             | 0               | 0               | 1               | 0               | 1   | 2.5                                 | 0.01                                   |
| Chr3:99Mb  | Unexplained | 3   | 98529269                     | 98700261  | 1   | 98564765                                            | 98664765  | 625             | 120             | 0               | 0               | 1               | 0               | 1   | 2.7                                 | 0                                      |
| Chr3:101Mb | Unexplained | 3   | 100595126                    | 100631549 | 1   | 100563338                                           | 100663338 | 614             | 125             | 6               | 0               | 1               | 0               | 1   | 0.7                                 | 0.49                                   |
| Chr3:112Mb | Unexplained | 3   | 112321426                    | 112321913 | 1   | 112271670                                           | 112371670 | 608             | 137             | 0               | 0               | 1               | 0               | 1   | 2.4                                 | 0                                      |
| Chr3:114Mb | Unexplained | 3   | 113537715                    | 113700809 | 1   | 113569262                                           | 113669262 | 613             | 130             | 2               | 0               | 0               | 1               | 1   | 1.4                                 | 0.14                                   |
| Chr3:116Mb | Unexplained | 3   | 115580195                    | 115648721 | 1   | 115564458                                           | 115664458 | 612             | 132             | 1               | 0               | 1               | 0               | 1   | 1.7                                 | 0.07                                   |
| Chr3:117Mb | Unexplained | 3   | 117450906                    | 117500426 | 1   | 117425666                                           | 117525666 | 601             | 137             | 7               | 0               | 0               | 1               | 1   | 0.6                                 | 0.59                                   |
| Chr3:118Mb | Unexplained | 3   | 117551943                    | 118643645 | 23  | 117949541                                           | 118049541 | 577             | 133             | 25              | 1               | 6               | 4               | 11  | 1.1                                 | 2.47                                   |
| Chr3:121Mb | Unexplained | 3   | 121088811                    | 121177353 | 1   | 121083082                                           | 121183082 | 600             | 143             | 2               | 0               | 1               | 0               | 1   | 1.3                                 | 0.14                                   |
| Chr3:122Mb | Unexplained | 3   | 122127957                    | 122501716 | 1   | 122264837                                           | 122364837 | 598             | 144             | 3               | 0               | 1               | 0               | 1   | 1.0                                 | 0.23                                   |
| Chr3:126Mb | Unexplained | 3   | 125833309                    | 125833309 | 1   | 122264837                                           | 122364837 | 598             | 144             | 3               | 0               | 1               | 0               | 1   | 1.0                                 | 0.23                                   |
| Chr3:135Mb | Unexplained | 3   | 134719509                    | 134776852 | 1   | 134698181                                           | 134798181 | 617             | 127             | 1               | 0               | 1               | 0               | 1   | 1.9                                 | 0.07                                   |
| Chr3:139Mb | Unexplained | 3   | 138513520                    | 138515487 | 1   | 138464504                                           | 138564504 | 622             | 122             | 1               | 0               | 1               | 0               | 1   | 1.7                                 | 0.06                                   |
| Chr3:150Mb | Unexplained | 3   | 149565568                    | 149609643 | 1   | 149537606                                           | 149637606 | 626             | 117             | 2               | 0               | 1               | 0               | 1   | 1.3                                 | 0.14                                   |
| Chr3:160Mb | Unexplained | 3   | 159963393                    | 160451921 | 1   | 160157657                                           | 160257657 | 629             | 115             | 1               | 0               | 1               | 0               | 1   | 1.7                                 | 0.07                                   |
| Chr3:167Mb | Unexplained | 3   | 163473630                    | 170723399 | 4   | 164909833                                           | 165009833 | 614             | 129             | 2               | 1               | 0               | 0               | 1   | 1.7                                 | 0.06                                   |
| Chr3:173Mb | Unexplained | 3   | 172963579                    | 173242902 | 1   | 173053241                                           | 173153241 | 640             | 104             | 1               | 0               | 0               | 1               | 1   | 1.7                                 | 0.08                                   |
| Chr3:176Mb | Unexplained | 3   | 175718180                    | 176151794 | 1   | 175884987                                           | 175984987 | 628             | 109             | 8               | 0               | 1               | 0               | 1   | 0.6                                 | 0.68                                   |
| Chr3:176Mb | Unexplained | 3   | 176276459                    | 176415397 | 3   | 176263972                                           | 176363972 | 623             | 108             | 12              | 0               | 1               | 2               | 3   | 0.8                                 | 1.13                                   |
| Chr3:177Mb | Unexplained | 3   | 176594778                    | 176644913 | 1   | 176569846                                           | 176669846 | 626             | 110             | 9               | 0               | 1               | 0               | 1   | 0.6                                 | 0.76                                   |
| Chr3:177Mb | Unexplained | 3   | 177356506                    | 177419625 | 2   | 177338066                                           | 177438066 | 631             | 111             | 2               | 0               | 2               | 0               | 2   | 2.0                                 | 0.19                                   |
| Chr3:178Mb | Unexplained | 3   | 177584360                    | 177731877 | 1   | 177608119                                           | 177708119 | 631             | 112             | 2               | 0               | 1               | 0               | 1   | 1.3                                 | 0.14                                   |
| Chr3:178Mb | Unexplained | 3   | 177759412                    | 178051136 | 1   | 177855274                                           | 177955274 | 635             | 109             | 1               | 0               | 1               | 0               | 1   | 1.8                                 | 0.07                                   |
| Chr3:178Mb | Unexplained | 3   | 178252497                    | 178299328 | 1   | 178225913                                           | 178325913 | 633             | 107             | 3               | 0               | 1               | 2               | 3   | 2.2                                 | 0.3                                    |
| Chr3:178Mb | Unexplained | 3   | 178311445                    | 178393271 | 3   | 178302358                                           | 178402358 | 632             | 107             | 4               | 0               | 1               | 2               | 3   | 1.8                                 | 0.39                                   |
| Chr3:183Mb | Unexplained | 3   | 182667290                    | 183123820 | 1   | 182845555                                           | 182945555 | 638             | 105             | 2               | 0               | 1               | 0               | 1   | 1.3                                 | 0.15                                   |
| Chr3:192Mb | Unexplained | 3   | 189053701                    | 194190385 | 2   | 189928304                                           | 190028304 | 631             | 110             | 3               | 1               | 1               | 0               | 2   | 2.1                                 | 0.19                                   |
| Chr4:0Mb   | Unexplained | 4   | 2282                         | 9896      | 1   | -43911                                              | 56089     | 552             | 188             | 5               | 0               | 1               | 0               | 1   | 0.7                                 | 0.41                                   |
| Chr4:6Mb   | Unexplained | 4   | 5489735                      | 5699617   | 1   | 5544676                                             | 5644676   | 527             | 217             | 1               | 0               | 1               | 0               | 1   | 1.5                                 | 0.07                                   |
| Chr4:7Mb   | Unexplained | 4   | 7169389                      | 7274060   | 1   | 7171725                                             | 7271725   | 526             | 219             | 0               | 0               | 1               | 0               | 1   | 2.5                                 | 0.01                                   |

| Loci         | Type        | Chr | Cluster Position/information |           |     | Deepest 100kb window location and deletion patterns |           |                 |                 |                 |                 |                 |                 |     | HD Selection Pressure ( $\lambda$ ) | Small Deletion Rate ( $\bar{p}_s$ , %) |
|--------------|-------------|-----|------------------------------|-----------|-----|-----------------------------------------------------|-----------|-----------------|-----------------|-----------------|-----------------|-----------------|-----------------|-----|-------------------------------------|----------------------------------------|
|              |             |     | 5'                           | 3'        | HDs | 5'                                                  | 3'        | n <sub>WW</sub> | n <sub>WL</sub> | n <sub>WS</sub> | n <sub>LL</sub> | n <sub>LS</sub> | n <sub>SS</sub> | HDs |                                     |                                        |
| Chr4:7Mb     | Unexplained | 4   | 7477838                      | 7492223   | 1   | 7435031                                             | 7535031   | 523             | 220             | 2               | 0               | 1               | 0               | 1   | 1.1                                 | 0.14                                   |
| Chr4:11Mb    | Unexplained | 4   | 10709333                     | 10865980  | 1   | 10737657                                            | 10837657  | 526             | 215             | 4               | 0               | 1               | 0               | 1   | 0.8                                 | 0.31                                   |
| Chr4:14Mb    | Unexplained | 4   | 14118789                     | 14694227  | 1   | 14356508                                            | 14456508  | 526             | 218             | 1               | 0               | 1               | 0               | 1   | 1.6                                 | 0.06                                   |
| Chr4:19Mb    | Unexplained | 4   | 18588530                     | 18704459  | 1   | 18596495                                            | 18696495  | 530             | 215             | 0               | 0               | 0               | 1               | 1   | 2.4                                 | 0.01                                   |
| Chr4:19Mb    | Unexplained | 4   | 18744230                     | 18972228  | 2   | 18848129                                            | 18948129  | 529             | 214             | 1               | 0               | 0               | 2               | 2   | 2.3                                 | 0.11                                   |
| Chr4:19Mb    | Unexplained | 4   | 19116260                     | 19545872  | 3   | 19347656                                            | 19447656  | 528             | 210             | 5               | 0               | 2               | 1               | 3   | 1.1                                 | 0.48                                   |
| Chr4:20Mb    | Unexplained | 4   | 19591428                     | 20348561  | 2   | 20041136                                            | 20141136  | 534             | 209             | 1               | 0               | 2               | 0               | 2   | 2.3                                 | 0.1                                    |
| Chr4:21Mb    | Unexplained | 4   | 20586523                     | 21256425  | 6   | 21032250                                            | 21132250  | 533             | 208             | 1               | 0               | 4               | 0               | 4   | 3.7                                 | 0.16                                   |
| Chr4:25Mb    | Unexplained | 4   | 24555613                     | 24571736  | 1   | 24513675                                            | 24613675  | 539             | 205             | 1               | 0               | 1               | 0               | 1   | 1.6                                 | 0.07                                   |
| Chr4:29Mb    | Unexplained | 4   | 28597846                     | 29314355  | 1   | 28906101                                            | 29006101  | 532             | 211             | 2               | 0               | 1               | 0               | 1   | 1.2                                 | 0.14                                   |
| Chr4:30Mb    | Unexplained | 4   | 30387161                     | 30472506  | 1   | 30379834                                            | 30479834  | 536             | 208             | 1               | 0               | 1               | 0               | 1   | 1.6                                 | 0.07                                   |
| Chr4:31Mb    | Unexplained | 4   | 30541944                     | 30612734  | 1   | 30527339                                            | 30627339  | 537             | 207             | 1               | 0               | 1               | 0               | 1   | 1.6                                 | 0.07                                   |
| Chr4:36Mb    | Unexplained | 4   | 35587814                     | 35821244  | 1   | 35654529                                            | 35754529  | 541             | 202             | 2               | 0               | 1               | 0               | 1   | 1.1                                 | 0.14                                   |
| Chr4:38Mb    | Unexplained | 4   | 37542357                     | 37578772  | 1   | 37510565                                            | 37610565  | 545             | 200             | 0               | 0               | 1               | 0               | 1   | 2.5                                 | 0                                      |
| Chr4:38Mb    | Unexplained | 4   | 37913485                     | 37939677  | 1   | 37876581                                            | 37976581  | 547             | 198             | 0               | 0               | 1               | 0               | 1   | 2.4                                 | 0.01                                   |
| Chr4:39Mb    | Unexplained | 4   | 39254472                     | 39445667  | 1   | 39300070                                            | 39400070  | 549             | 196             | 0               | 0               | 1               | 0               | 1   | 2.6                                 | 0                                      |
| Chr4:45Mb    | Unexplained | 4   | 43100468                     | 46792217  | 4   | 44711755                                            | 44811755  | 555             | 186             | 2               | 3               | 0               | 0               | 3   | 1.5                                 | 0.08                                   |
| Chr4:47Mb    | Unexplained | 4   | 47300268                     | 47501217  | 1   | 47350743                                            | 47450743  | 555             | 190             | 0               | 0               | 1               | 0               | 1   | 2.3                                 | 0.01                                   |
| Chr4:57Mb    | Unexplained | 4   | 57434656                     | 57475359  | 1   | 57405008                                            | 57505008  | 548             | 197             | 0               | 0               | 1               | 0               | 1   | 2.4                                 | 0                                      |
| Chr4:58Mb    | Unexplained | 4   | 57650610                     | 57661096  | 1   | 57605853                                            | 57705853  | 546             | 198             | 1               | 0               | 1               | 0               | 1   | 1.6                                 | 0.06                                   |
| Chr4:61Mb    | Unexplained | 4   | 61200202                     | 61243166  | 1   | 61171684                                            | 61271684  | 543             | 201             | 1               | 0               | 1               | 0               | 1   | 1.6                                 | 0.06                                   |
| Chr4:63Mb    | Unexplained | 4   | 62540508                     | 62568684  | 1   | 62504596                                            | 62604596  | 545             | 200             | 0               | 0               | 1               | 0               | 1   | 2.4                                 | 0.01                                   |
| Chr4:75Mb    | Unexplained | 4   | 74655918                     | 74698262  | 1   | 74627090                                            | 74727090  | 541             | 204             | 0               | 0               | 1               | 0               | 1   | 2.5                                 | 0                                      |
| Chr4:83Mb    | Unexplained | 4   | 82566187                     | 82606022  | 1   | 82536105                                            | 82636105  | 524             | 220             | 1               | 0               | 0               | 1               | 1   | 1.7                                 | 0.06                                   |
| Chr4:83Mb    | Unexplained | 4   | 82770650                     | 82784086  | 1   | 82727368                                            | 82827368  | 526             | 218             | 1               | 0               | 1               | 0               | 1   | 1.6                                 | 0.06                                   |
| Chr4:84Mb    | Unexplained | 4   | 83775432                     | 83785357  | 1   | 83730395                                            | 83830395  | 530             | 215             | 0               | 0               | 1               | 0               | 1   | 2.6                                 | 0                                      |
| Chr4:86Mb    | Unexplained | 4   | 86385434                     | 86399871  | 1   | 86342653                                            | 86442653  | 525             | 219             | 1               | 0               | 1               | 0               | 1   | 1.7                                 | 0.06                                   |
| Chr4:87Mb    | Unexplained | 4   | 87042730                     | 87484292  | 2   | 87268706                                            | 87368706  | 522             | 219             | 3               | 0               | 1               | 1               | 2   | 1.2                                 | 0.27                                   |
| Chr4:88Mb    | Unexplained | 4   | 87501779                     | 87558769  | 1   | 87480274                                            | 87580274  | 521             | 218             | 5               | 0               | 2               | 0               | 2   | 0.9                                 | 0.44                                   |
| Chr4:88Mb    | Unexplained | 4   | 87750065                     | 87860537  | 2   | 87755853                                            | 87855853  | 520             | 220             | 4               | 0               | 2               | 0               | 2   | 1.0                                 | 0.35                                   |
| <i>FRA4F</i> | FRA         | 4   | 89717384                     | 89756292  | 1   | 89686838                                            | 89786838  | 530             | 215             | 0               | 0               | 1               | 0               | 1   | 2.6                                 | 0                                      |
| <i>FRA4F</i> | FRA         | 4   | 89967906                     | 90238666  | 1   | 90053286                                            | 90153286  | 530             | 215             | 0               | 0               | 1               | 0               | 1   | 2.4                                 | 0.01                                   |
| <i>FRA4F</i> | FRA         | 4   | 91299621                     | 93425594  | 28  | 92078750                                            | 92178750  | 505             | 210             | 19              | 0               | 7               | 5               | 12  | 1.1                                 | 2.07                                   |
| <i>FRA4F</i> | FRA         | 4   | 93664713                     | 94266639  | 5   | 93783252                                            | 93883252  | 519             | 219             | 3               | 0               | 3               | 2               | 5   | 2.3                                 | 0.35                                   |
| <i>FRA4F</i> | FRA         | 4   | 94716876                     | 94722771  | 1   | 94669824                                            | 94769824  | 518             | 222             | 4               | 0               | 2               | 0               | 2   | 1.0                                 | 0.36                                   |
| <i>FRA4F</i> | FRA         | 4   | 94760264                     | 94906265  | 2   | 94794945                                            | 94894945  | 521             | 219             | 4               | 0               | 2               | 0               | 2   | 1.0                                 | 0.36                                   |
| Chr4:100Mb   | Unexplained | 4   | 99415850                     | 99626940  | 1   | 99471395                                            | 99571395  | 527             | 218             | 0               | 0               | 1               | 0               | 1   | 2.5                                 | 0                                      |
| Chr4:102Mb   | Unexplained | 4   | 102290694                    | 102473741 | 2   | 102334048                                           | 102434048 | 528             | 216             | 0               | 0               | 2               | 0               | 2   | 3.9                                 | 0.04                                   |
| Chr4:103Mb   | Unexplained | 4   | 103050308                    | 103256273 | 1   | 103103291                                           | 103203291 | 527             | 217             | 1               | 0               | 1               | 0               | 1   | 1.6                                 | 0.06                                   |
| Chr4:105Mb   | Unexplained | 4   | 104763051                    | 104764927 | 1   | 104713989                                           | 104813989 | 526             | 219             | 0               | 0               | 1               | 0               | 1   | 2.4                                 | 0                                      |
| Chr4:109Mb   | Unexplained | 4   | 109248266                    | 109304284 | 1   | 109226275                                           | 109326275 | 529             | 216             | 0               | 0               | 1               | 0               | 1   | 2.6                                 | 0.01                                   |
| Chr4:115Mb   | Unexplained | 4   | 115134935                    | 115202518 | 1   | 115118727                                           | 115218727 | 534             | 211             | 0               | 0               | 1               | 0               | 1   | 2.5                                 | 0.01                                   |
| Chr4:138Mb   | Unexplained | 4   | 137654861                    | 137693506 | 1   | 137624184                                           | 137724184 | 531             | 212             | 2               | 0               | 1               | 0               | 1   | 1.1                                 | 0.14                                   |
| Chr4:138Mb   | Unexplained | 4   | 137839702                    | 137857900 | 1   | 137798801                                           | 137898801 | 532             | 211             | 2               | 0               | 1               | 0               | 1   | 1.2                                 | 0.14                                   |



| Loci          | Type        | Chr | Cluster Position/information |           |     | Deepest 100kb window location and deletion patterns |           |                 |                 |                 |                 |                 |                 |     | HD Selection Pressure ( $\lambda$ ) | Small Deletion Rate ( $\bar{p}_s$ , %) |
|---------------|-------------|-----|------------------------------|-----------|-----|-----------------------------------------------------|-----------|-----------------|-----------------|-----------------|-----------------|-----------------|-----------------|-----|-------------------------------------|----------------------------------------|
|               |             |     | 5'                           | 3'        | HDs | 5'                                                  | 3'        | n <sub>WW</sub> | n <sub>WL</sub> | n <sub>WS</sub> | n <sub>LL</sub> | n <sub>LS</sub> | n <sub>SS</sub> | HDs |                                     |                                        |
| Chr5:107Mb    | Unexplained | 5   | 107410378                    | 107475020 | 1   | 107392699                                           | 107492699 | 517             | 224             | 2               | 0               | 3               | 0               | 3   | 2.1                                 | 0.21                                   |
| Chr5:108Mb    | Unexplained | 5   | 107486235                    | 107607974 | 1   | 107497105                                           | 107597105 | 517             | 226             | 2               | 0               | 1               | 0               | 1   | 1.1                                 | 0.14                                   |
| Chr5:109Mb    | Unexplained | 5   | 109389923                    | 109404785 | 2   | 109347354                                           | 109447354 | 522             | 221             | 1               | 0               | 2               | 0               | 2   | 2.4                                 | 0.11                                   |
| Chr5:114Mb    | Unexplained | 5   | 113060747                    | 115678259 | 3   | 114685955                                           | 114785955 | 515             | 227             | 3               | 1               | 0               | 0               | 1   | 0.9                                 | 0.15                                   |
| Chr5:116Mb    | Unexplained | 5   | 115726533                    | 115729036 | 1   | 115677785                                           | 115777785 | 519             | 224             | 1               | 1               | 1               | 0               | 2   | 3.5                                 | 0.05                                   |
| Chr5:116Mb    | Unexplained | 5   | 116239195                    | 116390012 | 1   | 116264604                                           | 116364604 | 519             | 225             | 1               | 0               | 1               | 0               | 1   | 1.5                                 | 0.06                                   |
| Chr5:119Mb    | Unexplained | 5   | 117432240                    | 119784672 | 3   | 118464359                                           | 118564359 | 514             | 227             | 2               | 1               | 2               | 0               | 3   | 2.6                                 | 0.14                                   |
| Chr5:122Mb    | Unexplained | 5   | 122067168                    | 122918564 | 2   | 122293872                                           | 122393872 | 513             | 228             | 3               | 0               | 2               | 0               | 2   | 1.2                                 | 0.27                                   |
| Chr5:125Mb    | Unexplained | 5   | 124510990                    | 124593631 | 1   | 124502311                                           | 124602311 | 519             | 226             | 0               | 0               | 1               | 0               | 1   | 2.3                                 | 0.01                                   |
| Chr5:130Mb    | Unexplained | 5   | 129627767                    | 130138355 | 1   | 129833061                                           | 129933061 | 497             | 247             | 1               | 0               | 1               | 0               | 1   | 1.5                                 | 0.06                                   |
| Chr5:131Mb    | Unexplained | 5   | 130747397                    | 131099339 | 1   | 130873368                                           | 130973368 | 488             | 255             | 2               | 0               | 1               | 0               | 1   | 1.1                                 | 0.14                                   |
| Chr5:133Mb    | Unexplained | 5   | 132873335                    | 132895596 | 1   | 132834466                                           | 132934466 | 521             | 224             | 0               | 0               | 1               | 0               | 1   | 2.6                                 | 0                                      |
| Chr5:133Mb    | Unexplained | 5   | 133436545                    | 133480434 | 1   | 133408490                                           | 133508490 | 518             | 226             | 1               | 0               | 1               | 0               | 1   | 1.7                                 | 0.06                                   |
| <i>CTNNA1</i> | Unexplained | 5   | 138050213                    | 138566379 | 7   | 138201518                                           | 138301518 | 515             | 220             | 4               | 0               | 7               | 0               | 7   | 2.6                                 | 0.46                                   |
| Chr5:139Mb    | Unexplained | 5   | 139266647                    | 139327160 | 1   | 139246904                                           | 139346904 | 526             | 218             | 1               | 0               | 1               | 0               | 1   | 1.5                                 | 0.07                                   |
| Chr5:146Mb    | Unexplained | 5   | 145795266                    | 145795266 | 1   | 139246904                                           | 139346904 | 526             | 218             | 1               | 0               | 1               | 0               | 1   | 1.7                                 | 0.07                                   |
| Chr5:151Mb    | Unexplained | 5   | 151146525                    | 151176325 | 1   | 151111425                                           | 151211425 | 520             | 220             | 5               | 0               | 1               | 0               | 1   | 0.6                                 | 0.41                                   |
| Chr5:152Mb    | Unexplained | 5   | 151939619                    | 151939943 | 1   | 151889781                                           | 151989781 | 516             | 223             | 6               | 0               | 1               | 0               | 1   | 0.6                                 | 0.5                                    |
| Chr5:153Mb    | Unexplained | 5   | 152413674                    | 152766066 | 1   | 152539870                                           | 152639870 | 522             | 222             | 1               | 0               | 1               | 0               | 1   | 1.6                                 | 0.06                                   |
| Chr5:164Mb    | Unexplained | 5   | 164247710                    | 164374155 | 1   | 164260933                                           | 164360933 | 525             | 216             | 4               | 0               | 0               | 1               | 1   | 0.8                                 | 0.31                                   |
| Chr5:165Mb    | Unexplained | 5   | 164585115                    | 164848079 | 1   | 164666597                                           | 164766597 | 521             | 216             | 8               | 0               | 1               | 0               | 1   | 0.5                                 | 0.7                                    |
| Chr5:166Mb    | Unexplained | 5   | 165377885                    | 165841862 | 2   | 165462438                                           | 165562438 | 532             | 210             | 2               | 0               | 2               | 0               | 2   | 1.6                                 | 0.19                                   |
| Chr5:166Mb    | Unexplained | 5   | 165991053                    | 166043677 | 1   | 165967365                                           | 166067365 | 528             | 212             | 5               | 0               | 1               | 0               | 1   | 0.6                                 | 0.41                                   |
| Chr5:167Mb    | Unexplained | 5   | 166310384                    | 167247921 | 1   | 166729153                                           | 166829153 | 529             | 214             | 2               | 0               | 1               | 0               | 1   | 1.2                                 | 0.13                                   |
| Chr5:169Mb    | Unexplained | 5   | 168396925                    | 168903710 | 1   | 168600318                                           | 168700318 | 537             | 208             | 0               | 0               | 1               | 0               | 1   | 2.5                                 | 0                                      |
| Chr5:171Mb    | Unexplained | 5   | 171206011                    | 171417209 | 1   | 171261610                                           | 171361610 | 540             | 204             | 1               | 0               | 1               | 0               | 1   | 1.6                                 | 0.07                                   |
| Chr5:174Mb    | Unexplained | 5   | 174483317                    | 174496241 | 1   | 174439779                                           | 174539779 | 539             | 206             | 0               | 0               | 1               | 0               | 1   | 2.6                                 | 0                                      |
| Chr6:0Mb      | Unexplained | 6   | 94662                        | 121697    | 1   | 58180                                               | 158180    | 584             | 157             | 3               | 0               | 1               | 1               | 2   | 1.4                                 | 0.27                                   |
| Chr6:0Mb      | Unexplained | 6   | 143341                       | 150947    | 1   | 97144                                               | 197144    | 584             | 157             | 3               | 0               | 1               | 1               | 2   | 1.5                                 | 0.26                                   |
| Chr6:1Mb      | Unexplained | 6   | 724944                       | 2142196   | 6   | 2014247                                             | 2114247   | 569             | 163             | 9               | 0               | 3               | 2               | 5   | 1.2                                 | 0.91                                   |
| Chr6:10Mb     | Unexplained | 6   | 10263319                     | 10285599  | 1   | 10224459                                            | 10324459  | 589             | 154             | 2               | 0               | 1               | 0               | 1   | 1.2                                 | 0.15                                   |
| Chr6:16Mb     | Unexplained | 6   | 15497156                     | 15567913  | 1   | 15482535                                            | 15582535  | 581             | 160             | 4               | 0               | 1               | 0               | 1   | 0.8                                 | 0.32                                   |
| Chr6:16Mb     | Unexplained | 6   | 15624264                     | 15647653  | 1   | 15585959                                            | 15685959  | 582             | 159             | 4               | 0               | 1               | 0               | 1   | 0.8                                 | 0.31                                   |
| Chr6:18Mb     | Unexplained | 6   | 18163742                     | 18223694  | 1   | 18143718                                            | 18243718  | 587             | 155             | 3               | 0               | 1               | 0               | 1   | 1.1                                 | 0.23                                   |
| Chr6:21Mb     | Unexplained | 6   | 20962815                     | 21423154  | 2   | 21241957                                            | 21341957  | 593             | 146             | 5               | 0               | 2               | 0               | 2   | 1.1                                 | 0.44                                   |
| Chr6:22Mb     | Unexplained | 6   | 21835435                     | 21848217  | 1   | 21791826                                            | 21891826  | 594             | 148             | 3               | 0               | 1               | 0               | 1   | 1.0                                 | 0.23                                   |
| Chr6:26Mb     | Unexplained | 6   | 26306025                     | 26343294  | 1   | 26274660                                            | 26374660  | 574             | 168             | 3               | 0               | 1               | 0               | 1   | 0.9                                 | 0.23                                   |
| <i>FRA6H</i>  | FRA         | 6   | 27229304                     | 27229304  | 1   | 26274660                                            | 26374660  | 574             | 168             | 3               | 0               | 1               | 0               | 1   | 1.0                                 | 0.22                                   |
| <i>FRA6H</i>  | FRA         | 6   | 29206860                     | 29269414  | 1   | 29188137                                            | 29288137  | 571             | 173             | 1               | 0               | 1               | 0               | 1   | 1.6                                 | 0.07                                   |
| <i>FRA6H</i>  | FRA         | 6   | 31425326                     | 31573774  | 1   | 31449550                                            | 31549550  | 573             | 163             | 9               | 0               | 1               | 0               | 1   | 0.5                                 | 0.78                                   |
| <i>FRA6H</i>  | FRA         | 6   | 35581776                     | 35818658  | 1   | 35650217                                            | 35750217  | 605             | 138             | 2               | 0               | 1               | 0               | 1   | 1.3                                 | 0.14                                   |
| Chr6:46Mb     | Unexplained | 6   | 45471316                     | 45598385  | 1   | 45484851                                            | 45584851  | 613             | 126             | 6               | 0               | 0               | 1               | 1   | 0.7                                 | 0.49                                   |
| Chr6:54Mb     | Unexplained | 6   | 53971874                     | 53979842  | 1   | 53925858                                            | 54025858  | 620             | 123             | 2               | 0               | 1               | 0               | 1   | 1.3                                 | 0.15                                   |
| Chr6:54Mb     | Unexplained | 6   | 54032893                     | 54033029  | 1   | 53982961                                            | 54082961  | 616             | 128             | 1               | 0               | 1               | 0               | 1   | 1.8                                 | 0.06                                   |

| Loci       | Type        | Chr | Cluster Position/information |           |     | Deepest 100kb window location and deletion patterns |           |                 |                 |                 |                 |                 |                 |     | HD Selection Pressure ( $\lambda$ ) | Small Deletion Rate ( $\bar{p}_s$ , %) |
|------------|-------------|-----|------------------------------|-----------|-----|-----------------------------------------------------|-----------|-----------------|-----------------|-----------------|-----------------|-----------------|-----------------|-----|-------------------------------------|----------------------------------------|
|            |             |     | 5'                           | 3'        | HDs | 5'                                                  | 3'        | n <sub>WW</sub> | n <sub>WL</sub> | n <sub>WS</sub> | n <sub>LL</sub> | n <sub>LS</sub> | n <sub>SS</sub> | HDs |                                     |                                        |
| Chr6:55Mb  | Unexplained | 6   | 54220045                     | 55164912  | 1   | 54642479                                            | 54742479  | 616             | 127             | 2               | 0               | 1               | 0               | 1   | 1.3                                 | 0.16                                   |
| Chr6:58Mb  | Unexplained | 6   | 57725062                     | 57725180  | 1   | 57675121                                            | 57775121  | 607             | 132             | 6               | 0               | 1               | 0               | 1   | 0.7                                 | 0.5                                    |
| Chr6:62Mb  | Unexplained | 6   | 62007078                     | 62031195  | 1   | 61969137                                            | 62069137  | 580             | 162             | 3               | 0               | 1               | 0               | 1   | 1.0                                 | 0.23                                   |
| Chr6:65Mb  | Unexplained | 6   | 64409318                     | 66051700  | 2   | 65722495                                            | 65822495  | 586             | 157             | 1               | 1               | 1               | 0               | 2   | 3.5                                 | 0.05                                   |
| Chr6:69Mb  | Unexplained | 6   | 66161367                     | 71172893  | 4   | 67414364                                            | 67514364  | 590             | 154             | 1               | 1               | 0               | 0               | 1   | 2.4                                 | 0.01                                   |
| Chr6:72Mb  | Unexplained | 6   | 71689103                     | 71689552  | 1   | 71639328                                            | 71739328  | 569             | 172             | 4               | 0               | 0               | 1               | 1   | 0.8                                 | 0.31                                   |
| Chr6:76Mb  | Unexplained | 6   | 75600547                     | 75600850  | 1   | 75550699                                            | 75650699  | 560             | 185             | 0               | 0               | 1               | 0               | 1   | 2.7                                 | 0                                      |
| Chr6:81Mb  | Unexplained | 6   | 80663439                     | 80669465  | 1   | 80616452                                            | 80716452  | 542             | 203             | 0               | 0               | 1               | 0               | 1   | 2.5                                 | 0                                      |
| Chr6:82Mb  | Unexplained | 6   | 81447257                     | 82512898  | 1   | 81930078                                            | 82030078  | 536             | 203             | 6               | 1               | 0               | 0               | 1   | 0.6                                 | 0.42                                   |
| Chr6:87Mb  | Unexplained | 6   | 87463370                     | 87467838  | 1   | 87415604                                            | 87515604  | 529             | 216             | 0               | 0               | 1               | 0               | 1   | 2.7                                 | 0                                      |
| Chr6:89Mb  | Unexplained | 6   | 89477989                     | 89509075  | 1   | 89443532                                            | 89543532  | 533             | 212             | 0               | 0               | 1               | 0               | 1   | 2.6                                 | 0                                      |
| Chr6:96Mb  | Unexplained | 6   | 94953933                     | 96307508  | 1   | 95580721                                            | 95680721  | 526             | 218             | 1               | 1               | 0               | 0               | 1   | 2.5                                 | 0.01                                   |
| Chr6:97Mb  | Unexplained | 6   | 96361189                     | 96939216  | 1   | 96600203                                            | 96700203  | 530             | 214             | 1               | 0               | 1               | 0               | 1   | 1.6                                 | 0.06                                   |
| Chr6:101Mb | Unexplained | 6   | 100421147                    | 100628893 | 1   | 100475020                                           | 100575020 | 530             | 215             | 0               | 0               | 1               | 0               | 1   | 2.7                                 | 0.01                                   |
| Chr6:102Mb | Unexplained | 6   | 101716283                    | 102267967 | 3   | 101845580                                           | 101945580 | 525             | 214             | 4               | 0               | 3               | 0               | 3   | 1.4                                 | 0.37                                   |
| Chr6:103Mb | Unexplained | 6   | 102446702                    | 103844778 | 2   | 102969913                                           | 103069913 | 523             | 220             | 1               | 1               | 1               | 0               | 2   | 3.1                                 | 0.04                                   |
| Chr6:105Mb | Unexplained | 6   | 103868726                    | 106397898 | 1   | 105083312                                           | 105183312 | 524             | 219             | 2               | 1               | 0               | 0               | 1   | 1.6                                 | 0.07                                   |
| Chr6:109Mb | Unexplained | 6   | 108105720                    | 109801294 | 3   | 108928941                                           | 109028941 | 522             | 221             | 1               | 1               | 1               | 0               | 2   | 3.7                                 | 0.04                                   |
| Chr6:115Mb | Unexplained | 6   | 115309295                    | 115309483 | 1   | 115259389                                           | 115359389 | 517             | 226             | 2               | 0               | 1               | 0               | 1   | 1.2                                 | 0.14                                   |
| Chr6:116Mb | Unexplained | 6   | 116271124                    | 116495100 | 1   | 116333112                                           | 116433112 | 517             | 228             | 0               | 0               | 1               | 0               | 1   | 2.5                                 | 0                                      |
| Chr6:118Mb | Unexplained | 6   | 117752740                    | 117989302 | 1   | 117821021                                           | 117921021 | 525             | 218             | 2               | 0               | 1               | 0               | 1   | 1.2                                 | 0.14                                   |
| Chr6:127Mb | Unexplained | 6   | 126527665                    | 126642922 | 1   | 126535294                                           | 126635294 | 534             | 210             | 1               | 0               | 1               | 0               | 1   | 1.7                                 | 0.06                                   |
| Chr6:129Mb | Unexplained | 6   | 129050244                    | 129071927 | 1   | 129011086                                           | 129111086 | 537             | 207             | 1               | 0               | 1               | 0               | 1   | 1.7                                 | 0.07                                   |
| Chr6:129Mb | Unexplained | 6   | 129147389                    | 129515904 | 1   | 129281647                                           | 129381647 | 537             | 207             | 1               | 0               | 1               | 0               | 1   | 1.7                                 | 0.06                                   |
| Chr6:131Mb | Unexplained | 6   | 130369251                    | 131063505 | 1   | 130666378                                           | 130766378 | 533             | 212             | 0               | 0               | 1               | 0               | 1   | 2.4                                 | 0                                      |
| Chr6:131Mb | Unexplained | 6   | 131343527                    | 131399866 | 1   | 131321697                                           | 131421697 | 532             | 212             | 1               | 0               | 0               | 1               | 1   | 1.6                                 | 0.06                                   |
| Chr6:134Mb | Unexplained | 6   | 134371090                    | 134579141 | 1   | 134425116                                           | 134525116 | 539             | 206             | 0               | 0               | 1               | 0               | 1   | 2.5                                 | 0.01                                   |
| Chr6:136Mb | Unexplained | 6   | 136282309                    | 136294906 | 1   | 136238608                                           | 136338608 | 532             | 212             | 1               | 0               | 1               | 0               | 1   | 1.7                                 | 0.06                                   |
| Chr6:137Mb | Unexplained | 6   | 136803945                    | 136858183 | 1   | 136781064                                           | 136881064 | 533             | 212             | 0               | 0               | 1               | 0               | 1   | 2.4                                 | 0.01                                   |
| Chr6:145Mb | Unexplained | 6   | 144819070                    | 144859045 | 1   | 144789058                                           | 144889058 | 527             | 215             | 3               | 0               | 1               | 0               | 1   | 0.9                                 | 0.23                                   |
| Chr6:148Mb | Unexplained | 6   | 147675812                    | 147795002 | 1   | 147685407                                           | 147785407 | 525             | 219             | 1               | 0               | 1               | 0               | 1   | 1.6                                 | 0.07                                   |
| Chr6:148Mb | Unexplained | 6   | 148169055                    | 148340813 | 1   | 148204934                                           | 148304934 | 524             | 218             | 3               | 0               | 1               | 0               | 1   | 0.9                                 | 0.22                                   |
| Chr6:151Mb | Unexplained | 6   | 151016764                    | 151089630 | 1   | 151003197                                           | 151103197 | 521             | 220             | 4               | 0               | 0               | 1               | 1   | 0.7                                 | 0.33                                   |
| Chr6:153Mb | Unexplained | 6   | 152497791                    | 152608629 | 1   | 152503210                                           | 152603210 | 523             | 221             | 1               | 0               | 1               | 0               | 1   | 1.6                                 | 0.06                                   |
| Chr6:157Mb | Unexplained | 6   | 156071068                    | 157577252 | 1   | 156774160                                           | 156874160 | 518             | 227             | 0               | 1               | 0               | 0               | 1   | 2.0                                 | 0                                      |
| Chr6:159Mb | Unexplained | 6   | 159285948                    | 159585894 | 1   | 159385921                                           | 159485921 | 510             | 233             | 2               | 0               | 1               | 0               | 1   | 1.1                                 | 0.14                                   |
| FRA6E      | FRA         | 6   | 162001753                    | 162016191 | 1   | 161958972                                           | 162058972 | 508             | 236             | 1               | 0               | 1               | 0               | 1   | 1.7                                 | 0.06                                   |
| FRA6E      | FRA         | 6   | 162097013                    | 163153670 | 24  | 162617608                                           | 162717608 | 493             | 231             | 11              | 0               | 6               | 5               | 11  | 1.6                                 | 1.23                                   |
| FRA6E      | FRA         | 6   | 163424885                    | 163521338 | 1   | 163423112                                           | 163523112 | 503             | 239             | 3               | 0               | 0               | 1               | 1   | 0.9                                 | 0.23                                   |
| Chr6:164Mb | Unexplained | 6   | 164112429                    | 164119214 | 1   | 164065822                                           | 164165822 | 504             | 241             | 0               | 0               | 1               | 0               | 1   | 2.6                                 | 0.01                                   |
| Chr6:165Mb | Unexplained | 6   | 165234976                    | 165252870 | 1   | 165193923                                           | 165293923 | 506             | 239             | 0               | 0               | 1               | 0               | 1   | 2.5                                 | 0                                      |
| Chr6:168Mb | Unexplained | 6   | 167557139                    | 167685241 | 1   | 167571190                                           | 167671190 | 509             | 235             | 1               | 0               | 1               | 0               | 1   | 1.6                                 | 0.06                                   |
| Chr6:169Mb | Unexplained | 6   | 168950563                    | 168961276 | 1   | 168905920                                           | 169005920 | 511             | 233             | 1               | 0               | 1               | 0               | 1   | 1.5                                 | 0.07                                   |
| Chr6:170Mb | Unexplained | 6   | 169436528                    | 169738682 | 1   | 169537605                                           | 169637605 | 506             | 233             | 6               | 0               | 1               | 0               | 1   | 0.5                                 | 0.51                                   |

| Loci         | Type        | Chr | Cluster Position/information |           |     | Deepest 100kb window location and deletion patterns |           |                 |                 |                 |                 |                 |                 |     | HD Selection Pressure ( $\lambda$ ) | Small Deletion Rate ( $\bar{p}_s$ , %) |
|--------------|-------------|-----|------------------------------|-----------|-----|-----------------------------------------------------|-----------|-----------------|-----------------|-----------------|-----------------|-----------------|-----------------|-----|-------------------------------------|----------------------------------------|
|              |             |     | 5'                           | 3'        | HDs | 5'                                                  | 3'        | n <sub>WW</sub> | n <sub>WL</sub> | n <sub>WS</sub> | n <sub>LL</sub> | n <sub>LS</sub> | n <sub>SS</sub> | HDs |                                     |                                        |
| Chr7:5Mb     | Unexplained | 7   | 5350529                      | 5477173   | 1   | 5363851                                             | 5463851   | 659             | 85              | 1               | 0               | 1               | 0               | 1   | 1.7                                 | 0.07                                   |
| Chr7:11Mb    | Unexplained | 7   | 11180765                     | 11185511  | 1   | 11133138                                            | 11233138  | 650             | 91              | 4               | 0               | 1               | 0               | 1   | 1.0                                 | 0.31                                   |
| Chr7:17Mb    | Unexplained | 7   | 16974051                     | 17025700  | 1   | 16949876                                            | 17049876  | 665             | 80              | 0               | 0               | 1               | 0               | 1   | 2.7                                 | 0                                      |
| Chr7:33Mb    | Unexplained | 7   | 32556210                     | 32713204  | 1   | 32584707                                            | 32684707  | 666             | 76              | 3               | 0               | 1               | 0               | 1   | 1.1                                 | 0.22                                   |
| Immune       | Immune      | 7   | 38277623                     | 38318765  | 2   | 38248194                                            | 38348194  | 666             | 72              | 6               | 0               | 1               | 1               | 2   | 1.1                                 | 0.53                                   |
| <i>IKZF1</i> | RCG         | 7   | 50381219                     | 50411402  | 1   | 50346311                                            | 50446311  | 655             | 77              | 13              | 0               | 0               | 1               | 1   | 0.5                                 | 1.13                                   |
| Chr7:52Mb    | Unexplained | 7   | 51764656                     | 51808078  | 2   | 51736367                                            | 51836367  | 670             | 70              | 4               | 0               | 2               | 0               | 2   | 1.5                                 | 0.35                                   |
| Chr7:61Mb    | Unexplained | 7   | 61067917                     | 61292763  | 1   | 61130340                                            | 61230340  | 676             | 69              | 0               | 0               | 1               | 0               | 1   | 2.6                                 | 0.01                                   |
| Chr7:69Mb    | Unexplained | 7   | 68839812                     | 69037115  | 1   | 68888464                                            | 68988464  | 638             | 100             | 7               | 0               | 0               | 1               | 1   | 0.7                                 | 0.58                                   |
| Chr7:69Mb    | Unexplained | 7   | 69042736                     | 69657788  | 4   | 69487853                                            | 69587853  | 626             | 103             | 13              | 0               | 2               | 2               | 4   | 1.0                                 | 1.24                                   |
| Chr7:70Mb    | Unexplained | 7   | 69839145                     | 69853160  | 1   | 69796153                                            | 69896153  | 634             | 100             | 11              | 0               | 1               | 0               | 1   | 0.5                                 | 0.95                                   |
| Chr7:77Mb    | Unexplained | 7   | 76725125                     | 76765947  | 1   | 76695536                                            | 76795536  | 644             | 98              | 3               | 0               | 1               | 0               | 1   | 1.1                                 | 0.23                                   |
| Chr7:78Mb    | Unexplained | 7   | 77564181                     | 78169738  | 1   | 77816960                                            | 77916960  | 643             | 96              | 6               | 0               | 1               | 0               | 1   | 0.7                                 | 0.49                                   |
| Chr7:78Mb    | Unexplained | 7   | 78352512                     | 78487447  | 1   | 78369980                                            | 78469980  | 646             | 95              | 4               | 0               | 0               | 1               | 1   | 0.9                                 | 0.31                                   |
| Chr7:85Mb    | Unexplained | 7   | 84986899                     | 85032612  | 1   | 84959756                                            | 85059756  | 658             | 86              | 1               | 0               | 1               | 0               | 1   | 1.7                                 | 0.07                                   |
| Chr7:89Mb    | Unexplained | 7   | 88681697                     | 88686124  | 1   | 88633911                                            | 88733911  | 655             | 86              | 4               | 0               | 0               | 1               | 1   | 1.0                                 | 0.31                                   |
| Chr7:106Mb   | Unexplained | 7   | 105934520                    | 105944713 | 1   | 105889617                                           | 105989617 | 637             | 106             | 2               | 0               | 1               | 0               | 1   | 1.4                                 | 0.14                                   |
| Chr7:110Mb   | Unexplained | 7   | 109940124                    | 109984648 | 1   | 109912386                                           | 110012386 | 621             | 111             | 13              | 0               | 1               | 0               | 1   | 0.4                                 | 1.14                                   |
| Chr7:110Mb   | Unexplained | 7   | 110155033                    | 110165396 | 1   | 110110215                                           | 110210215 | 612             | 114             | 19              | 0               | 0               | 1               | 1   | 0.3                                 | 1.74                                   |
| <i>FRA7K</i> | FRA         | 7   | 110354205                    | 110694031 | 11  | 110530189                                           | 110630189 | 613             | 111             | 13              | 0               | 5               | 4               | 9   | 1.8                                 | 1.32                                   |
| <i>FRA7G</i> | FRA         | 7   | 111731619                    | 111747336 | 1   | 111689478                                           | 111789478 | 633             | 112             | 0               | 0               | 1               | 0               | 1   | 2.7                                 | 0                                      |
| Chr7:119Mb   | Unexplained | 7   | 119133266                    | 119177221 | 1   | 119105244                                           | 119205244 | 620             | 125             | 0               | 0               | 1               | 0               | 1   | 2.4                                 | 0.01                                   |
| Chr7:122Mb   | Unexplained | 7   | 121522170                    | 121587629 | 1   | 121504900                                           | 121604900 | 631             | 113             | 1               | 0               | 1               | 0               | 1   | 1.9                                 | 0.06                                   |
| Chr7:127Mb   | Unexplained | 7   | 126517268                    | 126665107 | 1   | 126541188                                           | 126641188 | 612             | 129             | 4               | 0               | 1               | 0               | 1   | 0.9                                 | 0.32                                   |
| <i>FRA7H</i> | FRA         | 7   | 130237152                    | 130277798 | 1   | 130207475                                           | 130307475 | 625             | 119             | 1               | 0               | 1               | 0               | 1   | 1.7                                 | 0.07                                   |
| Chr7:133Mb   | Unexplained | 7   | 132727425                    | 132769159 | 1   | 132698292                                           | 132798292 | 611             | 130             | 4               | 0               | 1               | 0               | 1   | 0.9                                 | 0.3                                    |
| Chr7:133Mb   | Unexplained | 7   | 133169399                    | 133596651 | 1   | 133333025                                           | 133433025 | 611             | 127             | 7               | 0               | 1               | 0               | 1   | 0.6                                 | 0.59                                   |
| Chr7:137Mb   | Unexplained | 7   | 136628615                    | 137284813 | 1   | 136906714                                           | 137006714 | 629             | 114             | 2               | 0               | 1               | 0               | 1   | 1.4                                 | 0.14                                   |
| Immune       | Immune      | 7   | 141721888                    | 142194079 | 3   | 142004783                                           | 142104783 | 615             | 118             | 10              | 0               | 1               | 2               | 3   | 0.9                                 | 0.93                                   |
| <i>FRA7I</i> | FRA         | 7   | 145769784                    | 145788509 | 1   | 145729147                                           | 145829147 | 619             | 119             | 6               | 0               | 2               | 0               | 2   | 1.0                                 | 0.54                                   |
| Chr7:146Mb   | Unexplained | 7   | 145812557                    | 146030850 | 1   | 145871704                                           | 145971704 | 621             | 120             | 4               | 0               | 1               | 0               | 1   | 0.9                                 | 0.31                                   |
| Chr7:146Mb   | Unexplained | 7   | 146099548                    | 146597809 | 7   | 146383383                                           | 146483383 | 604             | 121             | 16              | 0               | 1               | 4               | 5   | 0.9                                 | 1.57                                   |
| Chr7:147Mb   | Unexplained | 7   | 146666000                    | 146723687 | 1   | 146644844                                           | 146744844 | 600             | 122             | 23              | 0               | 1               | 0               | 1   | 0.3                                 | 2.15                                   |
| Chr7:154Mb   | Unexplained | 7   | 154363149                    | 154411438 | 1   | 154337294                                           | 154437294 | 613             | 128             | 4               | 0               | 1               | 0               | 1   | 0.9                                 | 0.31                                   |
| Chr7:159Mb   | Unexplained | 7   | 158798338                    | 158819766 | 1   | 158759052                                           | 158859052 | 610             | 126             | 9               | 0               | 1               | 0               | 1   | 0.5                                 | 0.78                                   |
| Chr8:2Mb     | Unexplained | 8   | 21255                        | 3307156   | 12  | 1827789                                             | 1927789   | 444             | 295             | 2               | 2               | 3               | 0               | 5   | 3.2                                 | 0.15                                   |
| Chr8:3Mb     | Unexplained | 8   | 3440295                      | 3469284   | 1   | 3404790                                             | 3504790   | 447             | 296             | 2               | 0               | 1               | 0               | 1   | 1.0                                 | 0.14                                   |
| Chr8:5Mb     | Unexplained | 8   | 3535435                      | 7158508   | 18  | 3883973                                             | 3983973   | 434             | 292             | 14              | 0               | 5               | 1               | 6   | 0.6                                 | 1.5                                    |
| Chr8:7Mb     | Unexplained | 8   | 7203153                      | 7673081   | 1   | 7388117                                             | 7488117   | 458             | 280             | 7               | 0               | 1               | 0               | 1   | 0.4                                 | 0.62                                   |
| Chr8:8Mb     | Unexplained | 8   | 8130593                      | 8261675   | 1   | 8146134                                             | 8246134   | 434             | 304             | 7               | 0               | 1               | 0               | 1   | 0.4                                 | 0.62                                   |
| Chr8:9Mb     | Unexplained | 8   | 8490799                      | 8562126   | 1   | 8476463                                             | 8576463   | 440             | 301             | 4               | 0               | 1               | 0               | 1   | 0.6                                 | 0.31                                   |
| Chr8:10Mb    | Unexplained | 8   | 9980317                      | 10089158  | 1   | 9984738                                             | 10084738  | 432             | 306             | 7               | 0               | 1               | 0               | 1   | 0.4                                 | 0.62                                   |
| Chr8:11Mb    | Unexplained | 8   | 11048140                     | 11048236  | 1   | 10998188                                            | 11098188  | 437             | 303             | 5               | 0               | 0               | 1               | 1   | 0.5                                 | 0.42                                   |
| Chr8:12Mb    | Unexplained | 8   | 11328193                     | 12314084  | 1   | 11771139                                            | 11871139  | 440             | 298             | 7               | 0               | 1               | 0               | 1   | 0.4                                 | 0.62                                   |

| Loci       | Type        | Chr | Cluster Position/information |           |     | Deepest 100kb window location and deletion patterns |           |                 |                 |                 |                 |                 |                 |     | HD Selection Pressure ( $\lambda$ ) | Small Deletion Rate ( $\bar{p}_s$ , %) |
|------------|-------------|-----|------------------------------|-----------|-----|-----------------------------------------------------|-----------|-----------------|-----------------|-----------------|-----------------|-----------------|-----------------|-----|-------------------------------------|----------------------------------------|
|            |             |     | 5'                           | 3'        | HDs | 5'                                                  | 3'        | n <sub>WW</sub> | n <sub>WL</sub> | n <sub>WS</sub> | n <sub>LL</sub> | n <sub>LS</sub> | n <sub>SS</sub> | HDs |                                     |                                        |
| Chr8:14Mb  | Unexplained | 8   | 12574653                     | 15813733  | 10  | 14208975                                            | 14308975  | 439             | 297             | 7               | 1               | 2               | 0               | 3   | 0.7                                 | 0.59                                   |
| Chr8:16Mb  | Unexplained | 8   | 15922671                     | 15931181  | 1   | 15876926                                            | 15976926  | 450             | 294             | 1               | 0               | 1               | 0               | 1   | 1.5                                 | 0.06                                   |
| Chr8:16Mb  | Unexplained | 8   | 16110852                     | 16157007  | 1   | 16083930                                            | 16183930  | 447             | 296             | 2               | 0               | 1               | 0               | 1   | 1.1                                 | 0.14                                   |
| Chr8:17Mb  | Unexplained | 8   | 16557446                     | 16614038  | 1   | 16535742                                            | 16635742  | 451             | 293             | 1               | 0               | 1               | 0               | 1   | 1.6                                 | 0.05                                   |
| Chr8:17Mb  | Unexplained | 8   | 16852569                     | 16872628  | 1   | 16812599                                            | 16912599  | 452             | 292             | 1               | 0               | 1               | 0               | 1   | 1.5                                 | 0.06                                   |
| Chr8:18Mb  | Unexplained | 8   | 17658216                     | 17658216  | 1   | 16812599                                            | 16912599  | 452             | 292             | 1               | 0               | 1               | 0               | 1   | 1.4                                 | 0.06                                   |
| Chr8:19Mb  | Unexplained | 8   | 18805668                     | 18849748  | 1   | 18777708                                            | 18877708  | 449             | 294             | 2               | 0               | 1               | 0               | 1   | 1.0                                 | 0.14                                   |
| Chr8:21Mb  | Unexplained | 8   | 21316576                     | 21330456  | 1   | 21273516                                            | 21373516  | 454             | 290             | 1               | 0               | 1               | 0               | 1   | 1.5                                 | 0.07                                   |
| Chr8:22Mb  | Unexplained | 8   | 22290483                     | 22382957  | 1   | 22286720                                            | 22386720  | 448             | 297             | 0               | 0               | 1               | 0               | 1   | 2.6                                 | 0                                      |
| Chr8:23Mb  | Unexplained | 8   | 23009988                     | 23156129  | 1   | 23033059                                            | 23133059  | 449             | 295             | 1               | 0               | 1               | 0               | 1   | 1.6                                 | 0.06                                   |
| Chr8:24Mb  | Unexplained | 8   | 23764436                     | 24113806  | 1   | 23889121                                            | 23989121  | 452             | 292             | 1               | 0               | 1               | 0               | 1   | 1.4                                 | 0.07                                   |
| Chr8:25Mb  | Unexplained | 8   | 25164152                     | 25407845  | 2   | 25246965                                            | 25346965  | 456             | 284             | 4               | 0               | 2               | 0               | 2   | 0.9                                 | 0.36                                   |
| Chr8:26Mb  | Unexplained | 8   | 25574066                     | 25643560  | 1   | 25558813                                            | 25658813  | 457             | 286             | 2               | 0               | 1               | 0               | 1   | 1.0                                 | 0.14                                   |
| Chr8:26Mb  | Unexplained | 8   | 26250052                     | 26287253  | 1   | 26218653                                            | 26318653  | 465             | 280             | 0               | 0               | 1               | 0               | 1   | 2.5                                 | 0                                      |
| Chr8:29Mb  | Unexplained | 8   | 28829982                     | 28893758  | 1   | 28811870                                            | 28911870  | 462             | 282             | 1               | 0               | 1               | 0               | 1   | 1.5                                 | 0.06                                   |
| Chr8:34Mb  | Unexplained | 8   | 34487708                     | 34491958  | 1   | 34439833                                            | 34539833  | 480             | 263             | 2               | 0               | 1               | 0               | 1   | 1.1                                 | 0.13                                   |
| Chr8:40Mb  | Unexplained | 8   | 39738317                     | 40075852  | 1   | 39857085                                            | 39957085  | 540             | 203             | 2               | 0               | 1               | 0               | 1   | 1.2                                 | 0.15                                   |
| Chr8:41Mb  | Unexplained | 8   | 40472275                     | 42187861  | 1   | 41280068                                            | 41380068  | 551             | 192             | 2               | 1               | 0               | 0               | 1   | 1.4                                 | 0.07                                   |
| Chr8:43Mb  | Unexplained | 8   | 42277205                     | 43580654  | 2   | 42409688                                            | 42509688  | 551             | 192             | 1               | 1               | 1               | 0               | 2   | 3.1                                 | 0.05                                   |
| Chr8:49Mb  | Unexplained | 8   | 48466062                     | 48688735  | 1   | 48527399                                            | 48627399  | 577             | 161             | 7               | 0               | 1               | 0               | 1   | 0.6                                 | 0.59                                   |
| Chr8:50Mb  | Unexplained | 8   | 50097857                     | 50124018  | 1   | 50060938                                            | 50160938  | 593             | 150             | 2               | 0               | 1               | 0               | 1   | 1.3                                 | 0.14                                   |
| Chr8:52Mb  | Unexplained | 8   | 50790621                     | 52586013  | 3   | 51369008                                            | 51469008  | 594             | 146             | 3               | 1               | 2               | 0               | 3   | 2.3                                 | 0.22                                   |
| Chr8:62Mb  | Unexplained | 8   | 61780186                     | 61857654  | 1   | 61768920                                            | 61868920  | 611             | 130             | 4               | 0               | 1               | 0               | 1   | 0.9                                 | 0.32                                   |
| Chr8:69Mb  | Unexplained | 8   | 68481518                     | 68924867  | 1   | 68653193                                            | 68753193  | 618             | 124             | 3               | 0               | 1               | 0               | 1   | 1.1                                 | 0.22                                   |
| Chr8:79Mb  | Unexplained | 8   | 79164192                     | 79485682  | 1   | 79274937                                            | 79374937  | 630             | 113             | 2               | 0               | 0               | 1               | 1   | 1.3                                 | 0.14                                   |
| Chr8:85Mb  | Unexplained | 8   | 83518639                     | 86054215  | 2   | 84089855                                            | 84189855  | 624             | 117             | 3               | 1               | 1               | 0               | 2   | 2.0                                 | 0.19                                   |
| Chr8:89Mb  | Unexplained | 8   | 89378640                     | 89469837  | 1   | 89374239                                            | 89474239  | 635             | 108             | 2               | 0               | 1               | 0               | 1   | 1.3                                 | 0.15                                   |
| Chr8:92Mb  | Unexplained | 8   | 91818505                     | 91912379  | 1   | 91815442                                            | 91915442  | 613             | 128             | 4               | 0               | 1               | 0               | 1   | 0.9                                 | 0.32                                   |
| Chr8:99Mb  | Unexplained | 8   | 99053935                     | 99090125  | 1   | 99022030                                            | 99122030  | 635             | 106             | 4               | 0               | 1               | 0               | 1   | 1.0                                 | 0.31                                   |
| Chr8:113Mb | Unexplained | 8   | 113288783                    | 113333754 | 1   | 113261269                                           | 113361269 | 608             | 135             | 2               | 0               | 1               | 0               | 1   | 1.3                                 | 0.14                                   |
| Chr8:115Mb | Unexplained | 8   | 114129824                    | 114881166 | 1   | 114455495                                           | 114555495 | 624             | 118             | 3               | 0               | 1               | 0               | 1   | 1.1                                 | 0.22                                   |
| Chr8:115Mb | Unexplained | 8   | 114912222                    | 114949817 | 1   | 114881020                                           | 114981020 | 632             | 109             | 4               | 0               | 1               | 0               | 1   | 0.9                                 | 0.31                                   |
| Chr8:115Mb | Unexplained | 8   | 115388262                    | 115425360 | 1   | 115356811                                           | 115456811 | 629             | 111             | 5               | 0               | 1               | 0               | 1   | 0.8                                 | 0.4                                    |
| Chr8:116Mb | Unexplained | 8   | 115670952                    | 115858530 | 1   | 115714741                                           | 115814741 | 631             | 112             | 2               | 0               | 1               | 0               | 1   | 1.3                                 | 0.15                                   |
| Chr8:117Mb | Unexplained | 8   | 116513427                    | 116606233 | 1   | 116509830                                           | 116609830 | 640             | 102             | 3               | 0               | 1               | 0               | 1   | 1.1                                 | 0.23                                   |
| Chr8:120Mb | Unexplained | 8   | 119603426                    | 119658567 | 1   | 119580997                                           | 119680997 | 634             | 109             | 2               | 0               | 1               | 0               | 1   | 1.4                                 | 0.14                                   |
| Chr8:129Mb | Unexplained | 8   | 128871130                    | 128983962 | 1   | 128877546                                           | 128977546 | 654             | 85              | 6               | 0               | 1               | 0               | 1   | 0.8                                 | 0.49                                   |
| Chr8:130Mb | Unexplained | 8   | 130185879                    | 130197300 | 1   | 130141590                                           | 130241590 | 644             | 95              | 6               | 0               | 1               | 0               | 1   | 0.7                                 | 0.5                                    |
| Chr8:134Mb | Unexplained | 8   | 133741996                    | 133763038 | 1   | 133702517                                           | 133802517 | 641             | 99              | 5               | 0               | 1               | 0               | 1   | 0.8                                 | 0.4                                    |
| Chr8:135Mb | Unexplained | 8   | 135376730                    | 135472827 | 1   | 135374779                                           | 135474779 | 640             | 103             | 2               | 0               | 1               | 0               | 1   | 1.4                                 | 0.14                                   |
| Chr8:138Mb | Unexplained | 8   | 137726741                    | 137757412 | 1   | 137692077                                           | 137792077 | 634             | 109             | 2               | 0               | 1               | 0               | 1   | 1.3                                 | 0.14                                   |
| Chr8:146Mb | Unexplained | 8   | 146263494                    | 146268960 | 1   | 146216227                                           | 146316227 | 626             | 116             | 3               | 0               | 1               | 0               | 1   | 1.1                                 | 0.22                                   |
| Chr9:2Mb   | Unexplained | 9   | 30910                        | 3974195   | 17  | 1223045                                             | 1323045   | 359             | 381             | 1               | 3               | 2               | 0               | 5   | 3.7                                 | 0.05                                   |
| Chr9:5Mb   | Unexplained | 9   | 5071417                      | 5074650   | 1   | 5023034                                             | 5123034   | 348             | 395             | 2               | 0               | 1               | 0               | 1   | 0.9                                 | 0.12                                   |

| Loci          | Type        | Chr | Cluster Position/information |           |     | Deepest 100kb window location and deletion patterns |           |                 |                 |                 |                 |                 |                 |     | HD Selection Pressure ( $\lambda$ ) | Small Deletion Rate ( $\bar{p}_s$ , %) |
|---------------|-------------|-----|------------------------------|-----------|-----|-----------------------------------------------------|-----------|-----------------|-----------------|-----------------|-----------------|-----------------|-----------------|-----|-------------------------------------|----------------------------------------|
|               |             |     | 5'                           | 3'        | HDs | 5'                                                  | 3'        | n <sub>WW</sub> | n <sub>WL</sub> | n <sub>WS</sub> | n <sub>LL</sub> | n <sub>LS</sub> | n <sub>SS</sub> | HDs |                                     |                                        |
| Chr9:7Mb      | Unexplained | 9   | 7288457                      | 7322306   | 1   | 7255382                                             | 7355382   | 343             | 401             | 1               | 0               | 1               | 0               | 1   | 1.4                                 | 0.05                                   |
| Chr9:12Mb     | Unexplained | 9   | 7961791                      | 15107483  | 71  | 9340929                                             | 9440929   | 314             | 383             | 21              | 8               | 19              | 1               | 28  | 0.7                                 | 2.53                                   |
| Chr9:17Mb     | Unexplained | 9   | 15461826                     | 18664104  | 11  | 16884874                                            | 16984874  | 328             | 412             | 3               | 3               | 0               | 0               | 3   | 0.7                                 | 0.13                                   |
| Chr9:19Mb     | Unexplained | 9   | 19007868                     | 19017880  | 1   | 18962874                                            | 19062874  | 325             | 419             | 1               | 0               | 1               | 0               | 1   | 1.3                                 | 0.06                                   |
| <i>CDKN2A</i> | RCG         | 9   | 19374943                     | 32371008  | 267 | 21924156                                            | 22024156  | 288             | 252             | 11              | 87              | 98              | 10              | 195 | 8.3                                 | 1.87                                   |
| Chr9:35Mb     | Unexplained | 9   | 35110680                     | 35217542  | 1   | 35114111                                            | 35214111  | 440             | 304             | 1               | 0               | 1               | 0               | 1   | 1.4                                 | 0.06                                   |
| Chr9:37Mb     | Unexplained | 9   | 37122116                     | 37303083  | 1   | 37162600                                            | 37262600  | 450             | 292             | 3               | 0               | 1               | 0               | 1   | 0.8                                 | 0.21                                   |
| Chr9:39Mb     | Unexplained | 9   | 38074481                     | 39768632  | 2   | 38846144                                            | 38946144  | 486             | 258             | 0               | 1               | 1               | 0               | 2   | 6.5                                 | 0                                      |
| Chr9:43Mb     | Unexplained | 9   | 41618270                     | 44667856  | 3   | 43718228                                            | 43818228  | 533             | 209             | 1               | 2               | 1               | 0               | 3   | 3.8                                 | 0.04                                   |
| Chr9:46Mb     | Unexplained | 9   | 45596441                     | 45928858  | 1   | 45712650                                            | 45812650  | 526             | 218             | 1               | 0               | 1               | 0               | 1   | 1.6                                 | 0.07                                   |
| Chr9:70Mb     | Unexplained | 9   | 70216332                     | 70216846  | 1   | 70166589                                            | 70266589  | 493             | 251             | 1               | 0               | 1               | 0               | 1   | 1.6                                 | 0.06                                   |
| Chr9:71Mb     | Unexplained | 9   | 70641802                     | 70751875  | 1   | 70646839                                            | 70746839  | 492             | 251             | 2               | 0               | 1               | 0               | 1   | 1.0                                 | 0.15                                   |
| Chr9:73Mb     | Unexplained | 9   | 73046659                     | 73273387  | 1   | 73110023                                            | 73210023  | 497             | 246             | 2               | 0               | 1               | 0               | 1   | 1.0                                 | 0.14                                   |
| Chr9:73Mb     | Unexplained | 9   | 73306558                     | 73328638  | 1   | 73267598                                            | 73367598  | 497             | 245             | 2               | 0               | 2               | 0               | 2   | 1.6                                 | 0.17                                   |
| Chr9:76Mb     | Unexplained | 9   | 76382189                     | 76408875  | 1   | 76345532                                            | 76445532  | 500             | 243             | 2               | 0               | 1               | 0               | 1   | 1.1                                 | 0.14                                   |
| Chr9:77Mb     | Unexplained | 9   | 76891163                     | 77168162  | 1   | 76979663                                            | 77079663  | 501             | 244             | 0               | 0               | 1               | 0               | 1   | 2.4                                 | 0.01                                   |
| Chr9:80Mb     | Unexplained | 9   | 79511878                     | 79550122  | 1   | 79481000                                            | 79581000  | 500             | 244             | 1               | 0               | 1               | 0               | 1   | 1.6                                 | 0.07                                   |
| Chr9:89Mb     | Unexplained | 9   | 88868351                     | 89037204  | 1   | 88902778                                            | 89002778  | 504             | 241             | 0               | 0               | 1               | 0               | 1   | 2.5                                 | 0                                      |
| <i>FRA9D</i>  | FRA         | 9   | 96899013                     | 96948852  | 1   | 96873933                                            | 96973933  | 506             | 235             | 4               | 0               | 1               | 0               | 1   | 0.7                                 | 0.31                                   |
| Chr9:98Mb     | Unexplained | 9   | 97379794                     | 98032498  | 1   | 97656146                                            | 97756146  | 511             | 233             | 1               | 0               | 1               | 0               | 1   | 1.5                                 | 0.06                                   |
| Chr9:101Mb    | Unexplained | 9   | 100239016                    | 100918750 | 1   | 100528883                                           | 100628883 | 507             | 238             | 0               | 0               | 1               | 0               | 1   | 2.5                                 | 0.01                                   |
| Chr9:105Mb    | Unexplained | 9   | 104042311                    | 105886217 | 3   | 104425629                                           | 104525629 | 508             | 235             | 2               | 1               | 0               | 0               | 1   | 1.4                                 | 0.07                                   |
| Chr9:107Mb    | Unexplained | 9   | 106811900                    | 107506049 | 1   | 107108975                                           | 107208975 | 513             | 230             | 2               | 0               | 1               | 0               | 1   | 1.1                                 | 0.15                                   |
| <i>FRA9E</i>  | FRA         | 9   | 112939714                    | 112985751 | 1   | 112912733                                           | 113012733 | 510             | 232             | 3               | 0               | 1               | 0               | 1   | 0.9                                 | 0.22                                   |
| <i>FRA9E</i>  | FRA         | 9   | 116470345                    | 117392214 | 1   | 116881280                                           | 116981280 | 503             | 233             | 9               | 0               | 1               | 0               | 1   | 0.4                                 | 0.8                                    |
| Chr9:118Mb    | Unexplained | 9   | 118333385                    | 118465478 | 1   | 118349432                                           | 118449432 | 507             | 233             | 5               | 0               | 1               | 0               | 1   | 0.6                                 | 0.41                                   |
| Chr9:121Mb    | Unexplained | 9   | 119666420                    | 121646966 | 2   | 120309611                                           | 120409611 | 507             | 233             | 4               | 1               | 1               | 0               | 2   | 1.1                                 | 0.28                                   |
| Chr9:122Mb    | Unexplained | 9   | 122005039                    | 122133808 | 1   | 122019424                                           | 122119424 | 511             | 233             | 1               | 0               | 1               | 0               | 1   | 1.6                                 | 0.06                                   |
| Chr9:125Mb    | Unexplained | 9   | 124399877                    | 124905818 | 3   | 124592729                                           | 124692729 | 510             | 232             | 1               | 0               | 3               | 0               | 3   | 2.8                                 | 0.14                                   |
| Chr9:126Mb    | Unexplained | 9   | 126227502                    | 126246506 | 1   | 126187004                                           | 126287004 | 512             | 233             | 0               | 0               | 1               | 0               | 1   | 2.5                                 | 0                                      |
| Chr9:128Mb    | Unexplained | 9   | 127950044                    | 127972347 | 1   | 127911196                                           | 128011196 | 514             | 230             | 1               | 0               | 1               | 0               | 1   | 1.5                                 | 0.06                                   |
| Chr9:131Mb    | Unexplained | 9   | 130932794                    | 131181502 | 1   | 131007148                                           | 131107148 | 510             | 235             | 0               | 0               | 0               | 1               | 1   | 2.5                                 | 0.01                                   |
| Chr9:132Mb    | Unexplained | 9   | 132347115                    | 132458826 | 1   | 132352971                                           | 132452971 | 509             | 236             | 0               | 0               | 1               | 0               | 1   | 2.6                                 | 0                                      |
| Chr9:133Mb    | Unexplained | 9   | 132647168                    | 132698755 | 1   | 132622962                                           | 132722962 | 512             | 233             | 0               | 0               | 1               | 0               | 1   | 2.2                                 | 0.01                                   |
| Chr9:135Mb    | Unexplained | 9   | 134744956                    | 134788055 | 1   | 134716506                                           | 134816506 | 510             | 234             | 1               | 0               | 1               | 0               | 1   | 1.6                                 | 0.07                                   |
| Chr9:136Mb    | Unexplained | 9   | 135714835                    | 135737675 | 1   | 135676255                                           | 135776255 | 507             | 236             | 2               | 0               | 1               | 0               | 1   | 1.1                                 | 0.14                                   |
| Chr10:1Mb     | Unexplained | 10  | 1468725                      | 1517849   | 1   | 1443287                                             | 1543287   | 487             | 256             | 2               | 0               | 1               | 0               | 1   | 1.1                                 | 0.14                                   |
| Chr10:7Mb     | Unexplained | 10  | 6759841                      | 6771924   | 1   | 6715883                                             | 6815883   | 495             | 247             | 3               | 0               | 1               | 0               | 1   | 0.8                                 | 0.23                                   |
| Chr10:9Mb     | Unexplained | 10  | 9428100                      | 9462817   | 1   | 9395459                                             | 9495459   | 493             | 250             | 2               | 0               | 1               | 0               | 1   | 1.0                                 | 0.15                                   |
| Chr10:12Mb    | Unexplained | 10  | 11300494                     | 11822773  | 1   | 11511634                                            | 11611634  | 494             | 251             | 0               | 0               | 1               | 0               | 1   | 2.4                                 | 0.01                                   |
| Chr10:19Mb    | Unexplained | 10  | 18225130                     | 18840560  | 1   | 18482845                                            | 18582845  | 497             | 245             | 3               | 0               | 1               | 0               | 1   | 0.9                                 | 0.22                                   |
| Chr10:20Mb    | Unexplained | 10  | 19574105                     | 19578834  | 1   | 19526470                                            | 19626470  | 494             | 247             | 4               | 0               | 1               | 0               | 1   | 0.7                                 | 0.32                                   |
| Chr10:20Mb    | Unexplained | 10  | 19950356                     | 20079640  | 2   | 19942373                                            | 20042373  | 495             | 245             | 4               | 0               | 2               | 0               | 2   | 1.0                                 | 0.36                                   |
| Chr10:21Mb    | Unexplained | 10  | 20964946                     | 20997482  | 1   | 20931214                                            | 21031214  | 493             | 247             | 5               | 0               | 1               | 0               | 1   | 0.6                                 | 0.41                                   |

| Loci          | Type        | Chr | Cluster Position/information |           |     | Deepest 100kb window location and deletion patterns |           |                 |                 |                 |                 |                 |                 |     | HD Selection Pressure ( $\lambda$ ) | Small Deletion Rate ( $\bar{p}_s$ , %) |
|---------------|-------------|-----|------------------------------|-----------|-----|-----------------------------------------------------|-----------|-----------------|-----------------|-----------------|-----------------|-----------------|-----------------|-----|-------------------------------------|----------------------------------------|
|               |             |     | 5'                           | 3'        | HDs | 5'                                                  | 3'        | n <sub>WW</sub> | n <sub>WL</sub> | n <sub>WS</sub> | n <sub>LL</sub> | n <sub>LS</sub> | n <sub>SS</sub> | HDs |                                     |                                        |
| Chr10:22Mb    | Unexplained | 10  | 21552505                     | 21552505  | 1   | 20931214                                            | 21031214  | 493             | 247             | 5               | 0               | 1               | 0               | 1   | 0.6                                 | 0.41                                   |
| Chr10:22Mb    | Unexplained | 10  | 22132858                     | 22268637  | 1   | 22150748                                            | 22250748  | 494             | 251             | 0               | 0               | 1               | 0               | 1   | 2.5                                 | 0                                      |
| Chr10:26Mb    | Unexplained | 10  | 25634365                     | 25893865  | 1   | 25714115                                            | 25814115  | 497             | 244             | 4               | 0               | 1               | 0               | 1   | 0.7                                 | 0.31                                   |
| Chr10:35Mb    | Unexplained | 10  | 34373277                     | 34942339  | 5   | 34713084                                            | 34813084  | 507             | 232             | 2               | 0               | 5               | 0               | 5   | 3.1                                 | 0.25                                   |
| Chr10:36Mb    | Unexplained | 10  | 35671306                     | 35864198  | 1   | 35717752                                            | 35817752  | 505             | 236             | 4               | 0               | 1               | 0               | 1   | 0.7                                 | 0.33                                   |
| Chr10:37Mb    | Unexplained | 10  | 37157289                     | 37165659  | 1   | 37111474                                            | 37211474  | 515             | 229             | 1               | 0               | 1               | 0               | 1   | 1.7                                 | 0.06                                   |
| Chr10:38Mb    | Unexplained | 10  | 37771922                     | 37809110  | 1   | 37740516                                            | 37840516  | 508             | 235             | 2               | 0               | 1               | 0               | 1   | 1.1                                 | 0.14                                   |
| Chr10:52Mb    | Unexplained | 10  | 52041194                     | 52067337  | 1   | 52004266                                            | 52104266  | 513             | 228             | 4               | 0               | 1               | 0               | 1   | 0.7                                 | 0.32                                   |
| Chr10:53Mb    | Unexplained | 10  | 52643305                     | 52992342  | 3   | 52666603                                            | 52766603  | 513             | 227             | 3               | 0               | 1               | 2               | 3   | 1.6                                 | 0.3                                    |
| Chr10:53Mb    | Unexplained | 10  | 53068329                     | 53245908  | 3   | 53143522                                            | 53243522  | 515             | 225             | 3               | 0               | 1               | 2               | 3   | 1.6                                 | 0.3                                    |
| Chr10:54Mb    | Unexplained | 10  | 54021111                     | 54097557  | 1   | 54009334                                            | 54109334  | 520             | 225             | 0               | 0               | 1               | 0               | 1   | 2.7                                 | 0                                      |
| Chr10:56Mb    | Unexplained | 10  | 55943495                     | 56149790  | 2   | 55955384                                            | 56055384  | 513             | 223             | 8               | 0               | 1               | 1               | 2   | 0.6                                 | 0.75                                   |
| Chr10:56Mb    | Unexplained | 10  | 56161598                     | 56546384  | 2   | 56230882                                            | 56330882  | 517             | 220             | 7               | 0               | 2               | 0               | 2   | 0.7                                 | 0.64                                   |
| Chr10:57Mb    | Unexplained | 10  | 57109213                     | 57397936  | 1   | 57203575                                            | 57303575  | 514             | 228             | 3               | 0               | 1               | 0               | 1   | 0.9                                 | 0.23                                   |
| Chr10:58Mb    | Unexplained | 10  | 57553354                     | 57981522  | 1   | 57717438                                            | 57817438  | 513             | 231             | 1               | 0               | 1               | 0               | 1   | 1.5                                 | 0.06                                   |
| Chr10:59Mb    | Unexplained | 10  | 58500316                     | 58500619  | 1   | 58450468                                            | 58550468  | 506             | 237             | 2               | 0               | 1               | 0               | 1   | 1.1                                 | 0.14                                   |
| Chr10:59Mb    | Unexplained | 10  | 58852354                     | 58896099  | 1   | 58824227                                            | 58924227  | 515             | 229             | 1               | 0               | 1               | 0               | 1   | 1.6                                 | 0.06                                   |
| Chr10:60Mb    | Unexplained | 10  | 59570658                     | 59692449  | 2   | 59585816                                            | 59685816  | 519             | 225             | 0               | 0               | 1               | 1               | 2   | 3.4                                 | 0.04                                   |
| Chr10:65Mb    | Unexplained | 10  | 65357809                     | 65445988  | 1   | 65351899                                            | 65451899  | 515             | 229             | 1               | 0               | 0               | 1               | 1   | 1.8                                 | 0.05                                   |
| <i>FRA10D</i> | FRA         | 10  | 67919305                     | 68184314  | 2   | 68030960                                            | 68130960  | 507             | 230             | 7               | 0               | 2               | 0               | 2   | 0.6                                 | 0.64                                   |
| Chr10:73Mb    | Unexplained | 10  | 72310009                     | 73557240  | 2   | 73070709                                            | 73170709  | 511             | 232             | 1               | 1               | 1               | 0               | 2   | 3.4                                 | 0.04                                   |
| Chr10:74Mb    | Unexplained | 10  | 73629854                     | 73693727  | 1   | 73611791                                            | 73711791  | 507             | 238             | 0               | 0               | 1               | 0               | 1   | 2.4                                 | 0                                      |
| Chr10:76Mb    | Unexplained | 10  | 75289072                     | 75821758  | 1   | 75505415                                            | 75605415  | 501             | 242             | 2               | 0               | 1               | 0               | 1   | 1.1                                 | 0.15                                   |
| Chr10:76Mb    | Unexplained | 10  | 75980352                     | 76448220  | 1   | 76164286                                            | 76264286  | 500             | 242             | 3               | 0               | 1               | 0               | 1   | 0.9                                 | 0.23                                   |
| Chr10:77Mb    | Unexplained | 10  | 76813186                     | 76854001  | 1   | 76783594                                            | 76883594  | 505             | 239             | 1               | 0               | 1               | 0               | 1   | 1.5                                 | 0.07                                   |
| Chr10:81Mb    | Unexplained | 10  | 80963622                     | 81549404  | 1   | 81206513                                            | 81306513  | 502             | 243             | 0               | 0               | 1               | 0               | 1   | 2.4                                 | 0                                      |
| Chr10:82Mb    | Unexplained | 10  | 81772720                     | 81783074  | 1   | 81727897                                            | 81827897  | 499             | 243             | 3               | 0               | 1               | 0               | 1   | 0.8                                 | 0.23                                   |
| Chr10:82Mb    | Unexplained | 10  | 81984157                     | 82314883  | 1   | 82099520                                            | 82199520  | 498             | 244             | 3               | 0               | 1               | 0               | 1   | 0.9                                 | 0.22                                   |
| Chr10:83Mb    | Unexplained | 10  | 82646263                     | 82681127  | 1   | 82613695                                            | 82713695  | 496             | 247             | 2               | 0               | 1               | 0               | 1   | 1.1                                 | 0.14                                   |
| Chr10:84Mb    | Unexplained | 10  | 83743775                     | 83842008  | 1   | 83742892                                            | 83842892  | 492             | 251             | 2               | 0               | 1               | 0               | 1   | 1.1                                 | 0.14                                   |
| Chr10:84Mb    | Unexplained | 10  | 84072973                     | 84298803  | 1   | 84135888                                            | 84235888  | 492             | 253             | 0               | 0               | 1               | 0               | 1   | 2.7                                 | 0                                      |
| Chr10:85Mb    | Unexplained | 10  | 84549866                     | 84721856  | 1   | 84585861                                            | 84685861  | 481             | 257             | 7               | 0               | 1               | 0               | 1   | 0.4                                 | 0.61                                   |
| Chr10:89Mb    | Unexplained | 10  | 88443366                     | 88611401  | 2   | 88477384                                            | 88577384  | 481             | 262             | 1               | 0               | 2               | 0               | 2   | 2.2                                 | 0.1                                    |
| <i>PTEN</i>   | RCG         | 10  | 89036479                     | 91160392  | 35  | 89602414                                            | 89702414  | 474             | 241             | 2               | 2               | 25              | 2               | 29  | 13.0                                | 0.37                                   |
| Chr10:91Mb    | Unexplained | 10  | 91200052                     | 91257298  | 1   | 91178675                                            | 91278675  | 478             | 266             | 1               | 0               | 1               | 0               | 1   | 1.6                                 | 0.05                                   |
| Chr10:92Mb    | Unexplained | 10  | 92452695                     | 92453356  | 1   | 92403026                                            | 92503026  | 477             | 266             | 2               | 0               | 1               | 0               | 1   | 1.1                                 | 0.13                                   |
| Chr10:104Mb   | Unexplained | 10  | 103603396                    | 103776162 | 1   | 103639779                                           | 103739779 | 478             | 266             | 1               | 0               | 1               | 0               | 1   | 1.5                                 | 0.07                                   |
| Chr10:108Mb   | Unexplained | 10  | 107974310                    | 108006360 | 1   | 107940335                                           | 108040335 | 479             | 265             | 1               | 0               | 1               | 0               | 1   | 1.6                                 | 0.06                                   |
| Chr10:110Mb   | Unexplained | 10  | 109832519                    | 109840926 | 1   | 109786723                                           | 109886723 | 469             | 272             | 4               | 0               | 1               | 0               | 1   | 0.7                                 | 0.31                                   |
| Chr10:111Mb   | Unexplained | 10  | 110759543                    | 110820852 | 1   | 110740198                                           | 110840198 | 472             | 273             | 0               | 0               | 1               | 0               | 1   | 2.8                                 | 0                                      |
| Chr10:111Mb   | Unexplained | 10  | 111109292                    | 111144556 | 1   | 111076924                                           | 111176924 | 472             | 273             | 0               | 0               | 1               | 0               | 1   | 2.7                                 | 0.01                                   |
| Chr10:115Mb   | Unexplained | 10  | 114655756                    | 114817274 | 1   | 114686515                                           | 114786515 | 475             | 267             | 3               | 0               | 1               | 0               | 1   | 0.8                                 | 0.23                                   |
| Chr10:117Mb   | Unexplained | 10  | 116937208                    | 117164977 | 1   | 117001093                                           | 117101093 | 472             | 271             | 2               | 0               | 1               | 0               | 1   | 1.1                                 | 0.14                                   |
| Chr10:127Mb   | Unexplained | 10  | 126631862                    | 126716070 | 1   | 126623966                                           | 126723966 | 482             | 262             | 1               | 0               | 1               | 0               | 1   | 1.5                                 | 0.06                                   |

| Loci          | Type        | Chr | Cluster Position/information |           |     | Deepest 100kb window location and deletion patterns |           |                 |                 |                 |                 |                 |                 |     | HD Selection Pressure ( $\lambda$ ) | Small Deletion Rate ( $\bar{p}_s$ , %) |
|---------------|-------------|-----|------------------------------|-----------|-----|-----------------------------------------------------|-----------|-----------------|-----------------|-----------------|-----------------|-----------------|-----------------|-----|-------------------------------------|----------------------------------------|
|               |             |     | 5'                           | 3'        | HDs | 5'                                                  | 3'        | n <sub>WW</sub> | n <sub>WL</sub> | n <sub>WS</sub> | n <sub>LL</sub> | n <sub>LS</sub> | n <sub>SS</sub> | HDs |                                     |                                        |
| Chr10:128Mb   | Unexplained | 10  | 127553824                    | 128086063 | 1   | 127769944                                           | 127869944 | 481             | 263             | 1               | 0               | 1               | 0               | 1   | 1.5                                 | 0.06                                   |
| Chr10:130Mb   | Unexplained | 10  | 129956458                    | 130059553 | 1   | 129958006                                           | 130058006 | 477             | 265             | 3               | 0               | 1               | 0               | 1   | 0.8                                 | 0.22                                   |
| Chr11:0Mb     | Unexplained | 11  | 188510                       | 208012    | 1   | 148261                                              | 248261    | 553             | 186             | 6               | 0               | 1               | 0               | 1   | 0.6                                 | 0.51                                   |
| Chr11:5Mb     | Unexplained | 11  | 4928582                      | 4933391   | 1   | 4880987                                             | 4980987   | 562             | 183             | 0               | 0               | 1               | 0               | 1   | 2.6                                 | 0.01                                   |
| Chr11:6Mb     | Unexplained | 11  | 6437788                      | 6519318   | 1   | 6428553                                             | 6528553   | 563             | 179             | 3               | 0               | 1               | 0               | 1   | 0.9                                 | 0.23                                   |
| Chr11:12Mb    | Unexplained | 11  | 11306969                     | 13282271  | 2   | 11977954                                            | 12077954  | 574             | 170             | 0               | 1               | 1               | 0               | 2   | 7.1                                 | 0                                      |
| Chr11:21Mb    | Unexplained | 11  | 20801428                     | 20806334  | 1   | 20753881                                            | 20853881  | 579             | 165             | 1               | 0               | 1               | 0               | 1   | 1.7                                 | 0.07                                   |
| Chr11:23Mb    | Unexplained | 11  | 23470058                     | 23476861  | 1   | 23423460                                            | 23523460  | 584             | 159             | 2               | 0               | 1               | 0               | 1   | 1.3                                 | 0.14                                   |
| Chr11:27Mb    | Unexplained | 11  | 26821318                     | 26832756  | 1   | 26777037                                            | 26877037  | 591             | 153             | 1               | 0               | 1               | 0               | 1   | 1.8                                 | 0.06                                   |
| Chr11:28Mb    | Unexplained | 11  | 28092213                     | 28335137  | 1   | 28163675                                            | 28263675  | 580             | 161             | 4               | 0               | 1               | 0               | 1   | 0.8                                 | 0.32                                   |
| Chr11:29Mb    | Unexplained | 11  | 28990528                     | 29011842  | 1   | 28951185                                            | 29051185  | 578             | 162             | 5               | 0               | 1               | 0               | 1   | 0.7                                 | 0.4                                    |
| Chr11:36Mb    | Unexplained | 11  | 36106218                     | 36299593  | 1   | 36152906                                            | 36252906  | 595             | 149             | 1               | 0               | 1               | 0               | 1   | 1.7                                 | 0.07                                   |
| Chr11:41Mb    | Unexplained | 11  | 38591857                     | 43614142  | 2   | 39094308                                            | 39194308  | 601             | 142             | 1               | 1               | 1               | 0               | 2   | 3.7                                 | 0.05                                   |
| Chr11:47Mb    | Unexplained | 11  | 47350214                     | 47352799  | 1   | 47301507                                            | 47401507  | 588             | 156             | 1               | 0               | 1               | 0               | 1   | 1.7                                 | 0.07                                   |
| Chr11:54Mb    | Unexplained | 11  | 51021762                     | 56412326  | 3   | 53343610                                            | 53443610  | 552             | 193             | 0               | 1               | 0               | 0               | 1   | 2.6                                 | 0                                      |
| Chr11:59Mb    | Unexplained | 11  | 58501706                     | 58972223  | 1   | 58686965                                            | 58786965  | 625             | 120             | 0               | 0               | 1               | 0               | 1   | 2.6                                 | 0                                      |
| Chr11:72Mb    | Unexplained | 11  | 71698463                     | 71756829  | 1   | 71677646                                            | 71777646  | 618             | 127             | 0               | 0               | 1               | 0               | 1   | 2.5                                 | 0.01                                   |
| Chr11:72Mb    | Unexplained | 11  | 72278128                     | 72429482  | 1   | 72303805                                            | 72403805  | 615             | 129             | 1               | 0               | 1               | 0               | 1   | 1.7                                 | 0.07                                   |
| Chr11:78Mb    | Unexplained | 11  | 78339146                     | 78387566  | 1   | 78313356                                            | 78413356  | 594             | 148             | 3               | 0               | 0               | 1               | 1   | 1.0                                 | 0.23                                   |
| Chr11:79Mb    | Unexplained | 11  | 78714313                     | 78819159  | 1   | 78716736                                            | 78816736  | 585             | 150             | 10              | 0               | 1               | 0               | 1   | 0.5                                 | 0.88                                   |
| Chr11:79Mb    | Unexplained | 11  | 79162785                     | 79190837  | 1   | 79126811                                            | 79226811  | 590             | 151             | 4               | 0               | 1               | 0               | 1   | 0.8                                 | 0.32                                   |
| Chr11:80Mb    | Unexplained | 11  | 79436315                     | 81117961  | 14  | 80386894                                            | 80486894  | 587             | 149             | 4               | 0               | 4               | 2               | 6   | 2.9                                 | 0.45                                   |
| <i>FRA11F</i> | FRA         | 11  | 82910180                     | 84247308  | 7   | 83990053                                            | 84090053  | 571             | 160             | 10              | 0               | 4               | 1               | 5   | 1.1                                 | 1                                      |
| <i>FRA11F</i> | FRA         | 11  | 84370744                     | 84452983  | 2   | 84361864                                            | 84461864  | 569             | 168             | 7               | 0               | 2               | 0               | 2   | 0.8                                 | 0.64                                   |
| Chr11:86Mb    | Unexplained | 11  | 85668850                     | 85927071  | 1   | 85747961                                            | 85847961  | 573             | 168             | 4               | 0               | 1               | 0               | 1   | 0.8                                 | 0.32                                   |
| Chr11:87Mb    | Unexplained | 11  | 87341237                     | 87424069  | 1   | 87332653                                            | 87432653  | 576             | 168             | 1               | 0               | 1               | 0               | 1   | 1.5                                 | 0.07                                   |
| Chr11:88Mb    | Unexplained | 11  | 87719881                     | 87884158  | 1   | 87752020                                            | 87852020  | 573             | 171             | 1               | 0               | 1               | 0               | 1   | 1.5                                 | 0.07                                   |
| Chr11:88Mb    | Unexplained | 11  | 87958907                     | 88202679  | 1   | 88030793                                            | 88130793  | 565             | 177             | 3               | 0               | 1               | 0               | 1   | 0.9                                 | 0.23                                   |
| Chr11:88Mb    | Unexplained | 11  | 88340850                     | 88477412  | 1   | 88359131                                            | 88459131  | 566             | 178             | 1               | 0               | 1               | 0               | 1   | 1.7                                 | 0.07                                   |
| Chr11:90Mb    | Unexplained | 11  | 90203047                     | 90309160  | 1   | 90206104                                            | 90306104  | 556             | 184             | 5               | 0               | 0               | 1               | 1   | 0.7                                 | 0.41                                   |
| Chr11:98Mb    | Unexplained | 11  | 98423215                     | 98564461  | 2   | 98443838                                            | 98543838  | 554             | 183             | 7               | 0               | 2               | 0               | 2   | 0.8                                 | 0.63                                   |
| Chr11:99Mb    | Unexplained | 11  | 98727539                     | 98801007  | 1   | 98714273                                            | 98814273  | 555             | 183             | 7               | 0               | 1               | 0               | 1   | 0.5                                 | 0.61                                   |
| Chr11:99Mb    | Unexplained | 11  | 99147243                     | 99147778  | 1   | 99097511                                            | 99197511  | 553             | 185             | 7               | 0               | 0               | 1               | 1   | 0.5                                 | 0.6                                    |
| Chr11:99Mb    | Unexplained | 11  | 99252539                     | 99540380  | 2   | 99429933                                            | 99529933  | 558             | 181             | 5               | 0               | 2               | 0               | 2   | 1.0                                 | 0.45                                   |
| Chr11:102Mb   | Unexplained | 11  | 101489838                    | 101579560 | 1   | 101484699                                           | 101584699 | 561             | 183             | 1               | 0               | 1               | 0               | 1   | 1.7                                 | 0.06                                   |
| Chr11:104Mb   | Unexplained | 11  | 104214277                    | 104234592 | 1   | 104174435                                           | 104274435 | 538             | 203             | 4               | 0               | 1               | 0               | 1   | 0.8                                 | 0.31                                   |
| Chr11:104Mb   | Unexplained | 11  | 104457493                    | 104515401 | 1   | 104436447                                           | 104536447 | 539             | 205             | 1               | 0               | 0               | 1               | 1   | 1.6                                 | 0.06                                   |
| Chr11:106Mb   | Unexplained | 11  | 105567939                    | 105858834 | 1   | 105663387                                           | 105763387 | 537             | 205             | 3               | 0               | 1               | 0               | 1   | 1.0                                 | 0.22                                   |
| Chr11:106Mb   | Unexplained | 11  | 105911070                    | 106019983 | 1   | 105915527                                           | 106015527 | 538             | 203             | 4               | 0               | 1               | 0               | 1   | 0.7                                 | 0.32                                   |
| Chr11:106Mb   | Unexplained | 11  | 106334261                    | 106377319 | 1   | 106305790                                           | 106405790 | 540             | 203             | 2               | 0               | 1               | 0               | 1   | 1.2                                 | 0.15                                   |
| Chr11:112Mb   | Unexplained | 11  | 111953068                    | 112077505 | 1   | 111965287                                           | 112065287 | 535             | 208             | 2               | 0               | 1               | 0               | 1   | 1.2                                 | 0.14                                   |
| <i>FRA11G</i> | FRA         | 11  | 113517369                    | 113548014 | 1   | 113482692                                           | 113582692 | 531             | 213             | 1               | 0               | 1               | 0               | 1   | 1.7                                 | 0.06                                   |
| <i>FRA11G</i> | FRA         | 11  | 114682413                    | 115297985 | 1   | 114940199                                           | 115040199 | 534             | 208             | 3               | 0               | 1               | 0               | 1   | 0.9                                 | 0.22                                   |
| <i>FRA11G</i> | FRA         | 11  | 116035461                    | 116080862 | 1   | 116008162                                           | 116108162 | 535             | 209             | 1               | 0               | 1               | 0               | 1   | 1.5                                 | 0.06                                   |

| Loci        | Type        | Chr | Cluster Position/information |           |     | Deepest 100kb window location and deletion patterns |           |                 |                 |                 |                 |                 |                 |     | HD Selection Pressure ( $\lambda$ ) | Small Deletion Rate ( $\bar{p}_s$ , %) |
|-------------|-------------|-----|------------------------------|-----------|-----|-----------------------------------------------------|-----------|-----------------|-----------------|-----------------|-----------------|-----------------|-----------------|-----|-------------------------------------|----------------------------------------|
|             |             |     | 5'                           | 3'        | HDs | 5'                                                  | 3'        | n <sub>WW</sub> | n <sub>WL</sub> | n <sub>WS</sub> | n <sub>LL</sub> | n <sub>LS</sub> | n <sub>SS</sub> | HDs |                                     |                                        |
| Chr11:120Mb | Unexplained | 11  | 120183810                    | 120297627 | 1   | 120190719                                           | 120290719 | 529             | 215             | 1               | 0               | 1               | 0               | 1   | 1.5                                 | 0.06                                   |
| Chr11:122Mb | Unexplained | 11  | 121905759                    | 122082893 | 1   | 121944326                                           | 122044326 | 532             | 213             | 0               | 0               | 1               | 0               | 1   | 2.6                                 | 0.01                                   |
| Chr11:125Mb | Unexplained | 11  | 124577136                    | 124588915 | 1   | 124533026                                           | 124633026 | 523             | 218             | 4               | 0               | 1               | 0               | 1   | 0.8                                 | 0.31                                   |
| Chr11:127Mb | Unexplained | 11  | 126156149                    | 128533664 | 3   | 127473220                                           | 127573220 | 518             | 224             | 2               | 1               | 1               | 0               | 2   | 2.2                                 | 0.11                                   |
| Chr11:130Mb | Unexplained | 11  | 130483070                    | 130489555 | 1   | 130436313                                           | 130536313 | 527             | 218             | 0               | 0               | 1               | 0               | 1   | 2.6                                 | 0                                      |
| Chr11:133Mb | Unexplained | 11  | 132601535                    | 132632556 | 1   | 132567046                                           | 132667046 | 526             | 218             | 1               | 0               | 1               | 0               | 1   | 1.6                                 | 0.07                                   |
| Chr11:134Mb | Unexplained | 11  | 134325488                    | 134449982 | 2   | 134368236                                           | 134468236 | 517             | 217             | 10              | 0               | 2               | 0               | 2   | 0.5                                 | 0.94                                   |
| Chr12:1Mb   | Unexplained | 12  | 485647                       | 611772    | 1   | 498710                                              | 598710    | 602             | 141             | 2               | 0               | 1               | 0               | 1   | 1.3                                 | 0.14                                   |
| Chr12:3Mb   | Unexplained | 12  | 2959273                      | 2987276   | 1   | 2923275                                             | 3023275   | 603             | 142             | 0               | 0               | 1               | 0               | 1   | 2.5                                 | 0.01                                   |
| Chr12:4Mb   | Unexplained | 12  | 3517792                      | 3811527   | 1   | 3614660                                             | 3714660   | 600             | 142             | 3               | 0               | 1               | 0               | 1   | 1.0                                 | 0.23                                   |
| Chr12:4Mb   | Unexplained | 12  | 3839387                      | 3886904   | 1   | 3813146                                             | 3913146   | 600             | 142             | 3               | 0               | 1               | 0               | 1   | 1.0                                 | 0.23                                   |
| Chr12:4Mb   | Unexplained | 12  | 3934417                      | 3942423   | 1   | 3888420                                             | 3988420   | 601             | 142             | 2               | 0               | 1               | 0               | 1   | 1.3                                 | 0.14                                   |
| Chr12:8Mb   | Unexplained | 12  | 8238073                      | 8303330   | 1   | 8220702                                             | 8320702   | 597             | 148             | 0               | 0               | 1               | 0               | 1   | 2.6                                 | 0                                      |
| Chr12:10Mb  | Unexplained | 12  | 9779283                      | 9801431   | 1   | 9740357                                             | 9840357   | 589             | 155             | 1               | 0               | 1               | 0               | 1   | 1.6                                 | 0.07                                   |
| Chr12:12Mb  | Unexplained | 12  | 11853840                     | 11973714  | 1   | 11863777                                            | 11963777  | 581             | 160             | 4               | 0               | 1               | 0               | 1   | 0.9                                 | 0.31                                   |
| Chr12:13Mb  | Unexplained | 12  | 12587000                     | 12691165  | 1   | 12589083                                            | 12689083  | 583             | 161             | 1               | 0               | 1               | 0               | 1   | 1.8                                 | 0.06                                   |
| Chr12:19Mb  | Unexplained | 12  | 18826457                     | 18827201  | 1   | 18776829                                            | 18876829  | 587             | 153             | 5               | 0               | 0               | 1               | 1   | 0.7                                 | 0.41                                   |
| Chr12:21Mb  | Unexplained | 12  | 20909063                     | 20921469  | 1   | 20865266                                            | 20965266  | 598             | 144             | 3               | 0               | 1               | 0               | 1   | 1.0                                 | 0.23                                   |
| Chr12:23Mb  | Unexplained | 12  | 22727319                     | 23058874  | 1   | 22843097                                            | 22943097  | 606             | 138             | 1               | 0               | 1               | 0               | 1   | 1.8                                 | 0.07                                   |
| Chr12:24Mb  | Unexplained | 12  | 23197970                     | 23829123  | 1   | 23463547                                            | 23563547  | 605             | 138             | 2               | 0               | 1               | 0               | 1   | 1.4                                 | 0.14                                   |
| Chr12:24Mb  | Unexplained | 12  | 23952305                     | 24129014  | 1   | 23990660                                            | 24090660  | 607             | 137             | 1               | 0               | 1               | 0               | 1   | 1.8                                 | 0.06                                   |
| Chr12:24Mb  | Unexplained | 12  | 24168059                     | 24695697  | 1   | 24381878                                            | 24481878  | 610             | 133             | 2               | 0               | 1               | 0               | 1   | 1.4                                 | 0.14                                   |
| Chr12:27Mb  | Unexplained | 12  | 26496160                     | 26878015  | 1   | 26637088                                            | 26737088  | 619             | 125             | 1               | 0               | 1               | 0               | 1   | 1.8                                 | 0.07                                   |
| Chr12:33Mb  | Unexplained | 12  | 32859603                     | 32922971  | 1   | 32841287                                            | 32941287  | 613             | 129             | 3               | 0               | 1               | 0               | 1   | 1.1                                 | 0.22                                   |
| Chr12:37Mb  | Unexplained | 12  | 36868380                     | 37459741  | 1   | 37114061                                            | 37214061  | 568             | 177             | 0               | 0               | 1               | 0               | 1   | 2.5                                 | 0                                      |
| Chr12:38Mb  | Unexplained | 12  | 37821407                     | 39116195  | 1   | 38418801                                            | 38518801  | 622             | 120             | 3               | 1               | 0               | 0               | 1   | 1.2                                 | 0.15                                   |
| Chr12:40Mb  | Unexplained | 12  | 39996357                     | 39996759  | 1   | 39946558                                            | 40046558  | 626             | 115             | 4               | 0               | 0               | 1               | 1   | 0.9                                 | 0.31                                   |
| Chr12:43Mb  | Unexplained | 12  | 41238696                     | 45426140  | 4   | 43659288                                            | 43759288  | 629             | 114             | 1               | 2               | 0               | 0               | 2   | 2.3                                 | 0.01                                   |
| Chr12:49Mb  | Unexplained | 12  | 49231897                     | 49684301  | 1   | 49408099                                            | 49508099  | 624             | 120             | 1               | 0               | 1               | 0               | 1   | 1.8                                 | 0.07                                   |
| Chr12:53Mb  | Unexplained | 12  | 53174317                     | 53577215  | 1   | 53325766                                            | 53425766  | 626             | 119             | 0               | 0               | 1               | 0               | 1   | 2.5                                 | 0.01                                   |
| Chr12:58Mb  | Unexplained | 12  | 58459673                     | 58460145  | 1   | 58409909                                            | 58509909  | 622             | 123             | 0               | 0               | 1               | 0               | 1   | 2.6                                 | 0.01                                   |
| Chr12:59Mb  | Unexplained | 12  | 58555429                     | 58583969  | 1   | 58519699                                            | 58619699  | 621             | 124             | 0               | 0               | 1               | 0               | 1   | 2.6                                 | 0.01                                   |
| Chr12:71Mb  | Unexplained | 12  | 71168873                     | 71234730  | 1   | 71151802                                            | 71251802  | 620             | 124             | 1               | 0               | 1               | 0               | 1   | 1.7                                 | 0.07                                   |
| Chr12:74Mb  | Unexplained | 12  | 74453227                     | 74529227  | 1   | 74441227                                            | 74541227  | 606             | 135             | 4               | 0               | 1               | 0               | 1   | 0.8                                 | 0.32                                   |
| Chr12:80Mb  | Unexplained | 12  | 80370589                     | 80458079  | 1   | 80364334                                            | 80464334  | 594             | 149             | 2               | 0               | 1               | 0               | 1   | 1.2                                 | 0.14                                   |
| Chr12:82Mb  | Unexplained | 12  | 81554832                     | 81622652  | 1   | 81538742                                            | 81638742  | 601             | 144             | 0               | 0               | 0               | 1               | 1   | 2.5                                 | 0.01                                   |
| Chr12:88Mb  | Unexplained | 12  | 87805434                     | 88092691  | 1   | 87899063                                            | 87999063  | 606             | 138             | 1               | 0               | 1               | 0               | 1   | 1.8                                 | 0.06                                   |
| Chr12:89Mb  | Unexplained | 12  | 88466521                     | 88536878  | 1   | 88451700                                            | 88551700  | 605             | 140             | 0               | 0               | 1               | 0               | 1   | 2.5                                 | 0.01                                   |
| Chr12:96Mb  | Unexplained | 12  | 95992558                     | 96032070  | 1   | 95962314                                            | 96062314  | 602             | 138             | 5               | 0               | 1               | 0               | 1   | 0.7                                 | 0.4                                    |
| Chr12:98Mb  | Unexplained | 12  | 98289943                     | 98702874  | 2   | 98403051                                            | 98503051  | 601             | 134             | 9               | 0               | 1               | 1               | 2   | 0.7                                 | 0.82                                   |
| Chr12:115Mb | Unexplained | 12  | 114855426                    | 114861755 | 1   | 114808591                                           | 114908591 | 618             | 126             | 1               | 0               | 1               | 0               | 1   | 1.7                                 | 0.07                                   |
| Chr12:115Mb | Unexplained | 12  | 114995540                    | 115094625 | 1   | 114995083                                           | 115095083 | 619             | 126             | 0               | 0               | 1               | 0               | 1   | 2.7                                 | 0.01                                   |
| Chr12:117Mb | Unexplained | 12  | 116568028                    | 116607728 | 1   | 116537878                                           | 116637878 | 619             | 126             | 0               | 0               | 1               | 0               | 1   | 2.5                                 | 0                                      |
| Chr12:120Mb | Unexplained | 12  | 119753085                    | 119833032 | 1   | 119743059                                           | 119843059 | 606             | 135             | 4               | 0               | 1               | 0               | 1   | 0.9                                 | 0.32                                   |

| Loci        | Type        | Chr | Cluster Position/information |           |     | Deepest 100kb window location and deletion patterns |           |                 |                 |                 |                 |                 |                 |     | HD Selection Pressure ( $\lambda$ ) | Small Deletion Rate ( $\bar{p}_s$ , %) |
|-------------|-------------|-----|------------------------------|-----------|-----|-----------------------------------------------------|-----------|-----------------|-----------------|-----------------|-----------------|-----------------|-----------------|-----|-------------------------------------|----------------------------------------|
|             |             |     | 5'                           | 3'        | HDs | 5'                                                  | 3'        | n <sub>WW</sub> | n <sub>WL</sub> | n <sub>WS</sub> | n <sub>LL</sub> | n <sub>LS</sub> | n <sub>SS</sub> | HDs |                                     |                                        |
| Chr12:127Mb | Unexplained | 12  | 127474822                    | 127479857 | 1   | 127427340                                           | 127527340 | 601             | 142             | 2               | 0               | 1               | 0               | 1   | 1.3                                 | 0.14                                   |
| Chr12:128Mb | Unexplained | 12  | 127700890                    | 127987816 | 1   | 127794353                                           | 127894353 | 600             | 145             | 0               | 0               | 1               | 0               | 1   | 2.5                                 | 0.01                                   |
| Chr13:19Mb  | Unexplained | 13  | 17924950                     | 20448369  | 8   | 18758147                                            | 18858147  | 451             | 285             | 6               | 3               | 1               | 0               | 4   | 0.7                                 | 0.46                                   |
| Chr13:21Mb  | Unexplained | 13  | 20452217                     | 20556867  | 2   | 20454542                                            | 20554542  | 456             | 288             | 0               | 0               | 2               | 0               | 2   | 3.5                                 | 0.04                                   |
| Chr13:25Mb  | Unexplained | 13  | 25305190                     | 25362382  | 1   | 25283786                                            | 25383786  | 452             | 292             | 1               | 0               | 1               | 0               | 1   | 1.5                                 | 0.06                                   |
| Chr13:29Mb  | Unexplained | 13  | 28782423                     | 28856776  | 1   | 28769600                                            | 28869600  | 457             | 288             | 0               | 0               | 1               | 0               | 1   | 2.5                                 | 0.01                                   |
| Chr13:30Mb  | Unexplained | 13  | 30427024                     | 30440032  | 1   | 30383528                                            | 30483528  | 452             | 292             | 1               | 0               | 1               | 0               | 1   | 1.7                                 | 0.05                                   |
| Chr13:36Mb  | Unexplained | 13  | 35703707                     | 36360010  | 1   | 35981859                                            | 36081859  | 439             | 304             | 2               | 0               | 1               | 0               | 1   | 1.0                                 | 0.13                                   |
| Chr13:37Mb  | Unexplained | 13  | 36507404                     | 36697335  | 1   | 36552370                                            | 36652370  | 438             | 304             | 3               | 0               | 1               | 0               | 1   | 0.7                                 | 0.22                                   |
| Chr13:38Mb  | Unexplained | 13  | 37501000                     | 37750345  | 1   | 37575673                                            | 37675673  | 437             | 306             | 2               | 0               | 1               | 0               | 1   | 1.0                                 | 0.14                                   |
| Chr13:39Mb  | Unexplained | 13  | 38960329                     | 38965996  | 2   | 38913163                                            | 39013163  | 433             | 306             | 5               | 0               | 2               | 0               | 2   | 0.7                                 | 0.44                                   |
| Chr13:46Mb  | Unexplained | 13  | 46297419                     | 46331041  | 1   | 46264230                                            | 46364230  | 423             | 320             | 2               | 0               | 1               | 0               | 1   | 1.0                                 | 0.14                                   |
| Chr13:47Mb  | Unexplained | 13  | 46371221                     | 47295638  | 1   | 46783430                                            | 46883430  | 423             | 320             | 2               | 0               | 1               | 0               | 1   | 0.9                                 | 0.14                                   |
| Chr13:47Mb  | Unexplained | 13  | 47312488                     | 47374942  | 2   | 47293715                                            | 47393715  | 419             | 322             | 3               | 0               | 2               | 0               | 2   | 1.0                                 | 0.26                                   |
| RB1         | RCG         | 13  | 47740750                     | 49554583  | 22  | 47835857                                            | 47935857  | 423             | 306             | 1               | 1               | 14              | 1               | 16  | 10.2                                | 0.22                                   |
| Chr13:50Mb  | Unexplained | 13  | 49918923                     | 50092830  | 1   | 49955877                                            | 50055877  | 427             | 314             | 4               | 0               | 1               | 0               | 1   | 0.6                                 | 0.31                                   |
| Chr13:57Mb  | Unexplained | 13  | 52162458                     | 61356469  | 13  | 54732751                                            | 54832751  | 421             | 316             | 2               | 5               | 2               | 0               | 7   | 2.3                                 | 0.14                                   |
| Chr13:63Mb  | Unexplained | 13  | 62843144                     | 62872126  | 1   | 62807635                                            | 62907635  | 448             | 295             | 2               | 0               | 1               | 0               | 1   | 1.0                                 | 0.13                                   |
| Chr13:63Mb  | Unexplained | 13  | 63243686                     | 63260884  | 1   | 63202285                                            | 63302285  | 448             | 293             | 4               | 0               | 1               | 0               | 1   | 0.6                                 | 0.32                                   |
| Chr13:63Mb  | Unexplained | 13  | 63426405                     | 63504969  | 1   | 63415687                                            | 63515687  | 448             | 293             | 4               | 0               | 1               | 0               | 1   | 0.6                                 | 0.32                                   |
| Chr13:66Mb  | Unexplained | 13  | 66197698                     | 66229437  | 1   | 66163568                                            | 66263568  | 455             | 286             | 4               | 0               | 1               | 0               | 1   | 0.6                                 | 0.31                                   |
| Chr13:69Mb  | Unexplained | 13  | 66470777                     | 71622059  | 2   | 69331251                                            | 69431251  | 461             | 281             | 2               | 1               | 1               | 0               | 2   | 1.7                                 | 0.11                                   |
| Chr13:77Mb  | Unexplained | 13  | 77241164                     | 77544243  | 1   | 77342704                                            | 77442704  | 473             | 271             | 1               | 0               | 1               | 0               | 1   | 1.6                                 | 0.06                                   |
| Chr13:85Mb  | Unexplained | 13  | 79658936                     | 89635029  | 8   | 84347580                                            | 84447580  | 473             | 269             | 3               | 1               | 0               | 0               | 1   | 1.0                                 | 0.14                                   |
| Chr13:90Mb  | Unexplained | 13  | 89874260                     | 89960670  | 1   | 89867465                                            | 89967465  | 481             | 263             | 1               | 0               | 1               | 0               | 1   | 1.7                                 | 0.05                                   |
| Chr13:91Mb  | Unexplained | 13  | 90892071                     | 91144436  | 1   | 90968254                                            | 91068254  | 479             | 264             | 2               | 0               | 0               | 1               | 1   | 1.0                                 | 0.14                                   |
| Chr13:93Mb  | Unexplained | 13  | 92973823                     | 93088355  | 1   | 92981089                                            | 93081089  | 470             | 269             | 6               | 0               | 1               | 0               | 1   | 0.5                                 | 0.52                                   |
| Chr13:93Mb  | Unexplained | 13  | 93454383                     | 93469018  | 1   | 93411701                                            | 93511701  | 472             | 266             | 7               | 0               | 1               | 0               | 1   | 0.4                                 | 0.61                                   |
| Chr13:97Mb  | Unexplained | 13  | 96604102                     | 96652088  | 1   | 96578095                                            | 96678095  | 474             | 271             | 0               | 0               | 1               | 0               | 1   | 2.6                                 | 0                                      |
| Chr13:98Mb  | Unexplained | 13  | 97362292                     | 98760893  | 1   | 98011593                                            | 98111593  | 475             | 269             | 1               | 1               | 0               | 0               | 1   | 2.3                                 | 0.01                                   |
| Chr13:100Mb | Unexplained | 13  | 99192406                     | 99863552  | 1   | 99477979                                            | 99577979  | 475             | 270             | 0               | 0               | 1               | 0               | 1   | 2.8                                 | 0                                      |
| Chr13:101Mb | Unexplained | 13  | 100616282                    | 100731618 | 1   | 100623950                                           | 100723950 | 477             | 267             | 1               | 0               | 1               | 0               | 1   | 1.5                                 | 0.07                                   |
| Chr13:104Mb | Unexplained | 13  | 104223256                    | 104246869 | 1   | 104185063                                           | 104285063 | 487             | 258             | 0               | 0               | 1               | 0               | 1   | 2.7                                 | 0                                      |
| Chr13:105Mb | Unexplained | 13  | 105197286                    | 105202838 | 1   | 105150062                                           | 105250062 | 484             | 258             | 3               | 0               | 1               | 0               | 1   | 0.8                                 | 0.23                                   |
| Chr13:105Mb | Unexplained | 13  | 105437745                    | 105448874 | 1   | 105393310                                           | 105493310 | 486             | 257             | 2               | 0               | 1               | 0               | 1   | 1.1                                 | 0.14                                   |
| Chr13:111Mb | Unexplained | 13  | 110902903                    | 110965422 | 1   | 110884163                                           | 110984163 | 486             | 257             | 2               | 0               | 1               | 0               | 1   | 1.1                                 | 0.14                                   |
| Immune      | Immune      | 14  | 21162536                     | 22082384  | 23  | 21926601                                            | 22026601  | 527             | 189             | 8               | 0               | 1               | 21              | 22  | 4.6                                 | 1.04                                   |
| Chr14:27Mb  | Unexplained | 14  | 27046455                     | 27074979  | 1   | 27010717                                            | 27110717  | 553             | 191             | 1               | 0               | 1               | 0               | 1   | 1.6                                 | 0.07                                   |
| Chr14:33Mb  | Unexplained | 14  | 32658262                     | 33123807  | 1   | 32841035                                            | 32941035  | 557             | 186             | 2               | 0               | 1               | 0               | 1   | 1.3                                 | 0.14                                   |
| Chr14:37Mb  | Unexplained | 14  | 36887004                     | 37024143  | 1   | 36905574                                            | 37005574  | 550             | 194             | 1               | 0               | 1               | 0               | 1   | 1.6                                 | 0.06                                   |
| Chr14:39Mb  | Unexplained | 14  | 38866403                     | 39455389  | 3   | 38954815                                            | 39054815  | 546             | 198             | 1               | 0               | 1               | 0               | 1   | 1.7                                 | 0.06                                   |
| Chr14:40Mb  | Unexplained | 14  | 39775280                     | 40048867  | 1   | 39862074                                            | 39962074  | 542             | 201             | 2               | 0               | 1               | 0               | 1   | 1.2                                 | 0.15                                   |
| Chr14:40Mb  | Unexplained | 14  | 40455256                     | 40515022  | 1   | 40435139                                            | 40535139  | 540             | 201             | 4               | 0               | 1               | 0               | 1   | 0.8                                 | 0.31                                   |
| Chr14:43Mb  | Unexplained | 14  | 42498484                     | 42506155  | 1   | 42452320                                            | 42552320  | 555             | 188             | 2               | 0               | 1               | 0               | 1   | 1.2                                 | 0.14                                   |

| Loci        | Type        | Chr | Cluster Position/information |           |     | Deepest 100kb window location and deletion patterns |           |                 |                 |                 |                 |                 |                 |     | HD Selection Pressure ( $\lambda$ ) | Small Deletion Rate ( $\bar{p}_s$ , %) |
|-------------|-------------|-----|------------------------------|-----------|-----|-----------------------------------------------------|-----------|-----------------|-----------------|-----------------|-----------------|-----------------|-----------------|-----|-------------------------------------|----------------------------------------|
|             |             |     | 5'                           | 3'        | HDs | 5'                                                  | 3'        | n <sub>WW</sub> | n <sub>WL</sub> | n <sub>WS</sub> | n <sub>LL</sub> | n <sub>LS</sub> | n <sub>SS</sub> | HDs |                                     |                                        |
| Chr14:45Mb  | Unexplained | 14  | 44538511                     | 44610888  | 1   | 44524700                                            | 44624700  | 550             | 190             | 5               | 0               | 1               | 0               | 1   | 0.7                                 | 0.41                                   |
| Chr14:50Mb  | Unexplained | 14  | 50040823                     | 50307451  | 3   | 50132136                                            | 50232136  | 556             | 187             | 0               | 0               | 2               | 1               | 3   | 4.8                                 | 0.07                                   |
| Chr14:56Mb  | Unexplained | 14  | 55978145                     | 56504053  | 1   | 56191099                                            | 56291099  | 551             | 189             | 5               | 0               | 1               | 0               | 1   | 0.7                                 | 0.4                                    |
| Chr14:58Mb  | Unexplained | 14  | 57515822                     | 57521959  | 1   | 57468891                                            | 57568891  | 555             | 189             | 1               | 0               | 1               | 0               | 1   | 1.6                                 | 0.06                                   |
| Chr14:59Mb  | Unexplained | 14  | 59055897                     | 59820118  | 1   | 59388008                                            | 59488008  | 541             | 202             | 2               | 0               | 1               | 0               | 1   | 1.2                                 | 0.14                                   |
| Chr14:60Mb  | Unexplained | 14  | 60421510                     | 60494184  | 1   | 60407847                                            | 60507847  | 543             | 199             | 3               | 0               | 1               | 0               | 1   | 1.0                                 | 0.22                                   |
| Chr14:63Mb  | Unexplained | 14  | 62773637                     | 63404631  | 1   | 63039134                                            | 63139134  | 540             | 205             | 0               | 0               | 1               | 0               | 1   | 2.4                                 | 0.01                                   |
| Chr14:65Mb  | Unexplained | 14  | 64612515                     | 64812190  | 1   | 64662353                                            | 64762353  | 535             | 208             | 2               | 0               | 1               | 0               | 1   | 1.2                                 | 0.14                                   |
| Chr14:66Mb  | Unexplained | 14  | 66210048                     | 66536925  | 2   | 66227058                                            | 66327058  | 520             | 219             | 5               | 0               | 2               | 0               | 2   | 0.9                                 | 0.45                                   |
| Chr14:68Mb  | Unexplained | 14  | 67262406                     | 68018912  | 1   | 67590659                                            | 67690659  | 537             | 204             | 4               | 0               | 1               | 0               | 1   | 0.8                                 | 0.31                                   |
| Chr14:69Mb  | Unexplained | 14  | 68560836                     | 68602144  | 1   | 68531490                                            | 68631490  | 542             | 203             | 0               | 0               | 1               | 0               | 1   | 2.4                                 | 0.01                                   |
| Chr14:85Mb  | Unexplained | 14  | 85385889                     | 85409024  | 1   | 85347457                                            | 85447457  | 543             | 201             | 1               | 0               | 1               | 0               | 1   | 1.6                                 | 0.07                                   |
| Chr14:91Mb  | Unexplained | 14  | 90472983                     | 90604391  | 1   | 90488687                                            | 90588687  | 539             | 206             | 0               | 0               | 1               | 0               | 1   | 2.7                                 | 0.01                                   |
| Chr14:97Mb  | Unexplained | 14  | 96710475                     | 96710475  | 1   | 90488687                                            | 90588687  | 539             | 206             | 0               | 0               | 1               | 0               | 1   | 2.5                                 | 0.01                                   |
| Chr14:97Mb  | Unexplained | 14  | 97249110                     | 97252070  | 1   | 97200590                                            | 97300590  | 536             | 207             | 2               | 0               | 1               | 0               | 1   | 1.2                                 | 0.14                                   |
| Chr14:98Mb  | Unexplained | 14  | 97882947                     | 97974794  | 1   | 97878871                                            | 97978871  | 531             | 209             | 5               | 0               | 1               | 0               | 1   | 0.6                                 | 0.42                                   |
| Chr14:99Mb  | Unexplained | 14  | 99294897                     | 99298712  | 1   | 99246805                                            | 99346805  | 536             | 208             | 1               | 0               | 1               | 0               | 1   | 1.7                                 | 0.06                                   |
| Chr14:102Mb | Unexplained | 14  | 102266836                    | 102529968 | 2   | 102389188                                           | 102489188 | 533             | 209             | 2               | 0               | 2               | 0               | 2   | 1.7                                 | 0.19                                   |
| Immune      | Immune      | 14  | 105317348                    | 106356482 | 4   | 105922002                                           | 106022002 | 628             | 110             | 5               | 1               | 1               | 1               | 3   | 1.7                                 | 0.4                                    |
| Chr15:19Mb  | Unexplained | 15  | 18276342                     | 20303147  | 3   | 18368218                                            | 18468218  | 663             | 80              | 0               | 2               | 1               | 0               | 3   | 6.7                                 | 0                                      |
| Chr15:21Mb  | Unexplained | 15  | 21192956                     | 21230588  | 1   | 21161772                                            | 21261772  | 574             | 168             | 3               | 0               | 0               | 1               | 1   | 1.0                                 | 0.22                                   |
| Chr15:22Mb  | Unexplained | 15  | 22231831                     | 22312283  | 2   | 22222057                                            | 22322057  | 582             | 162             | 0               | 0               | 2               | 0               | 2   | 3.6                                 | 0.05                                   |
| Chr15:27Mb  | Unexplained | 15  | 26998850                     | 27117346  | 2   | 26991509                                            | 27091509  | 578             | 166             | 0               | 0               | 2               | 0               | 2   | 3.8                                 | 0.04                                   |
| Chr15:28Mb  | Unexplained | 15  | 27654135                     | 27703958  | 1   | 27629047                                            | 27729047  | 579             | 166             | 0               | 0               | 1               | 0               | 1   | 2.6                                 | 0.01                                   |
| Chr15:29Mb  | Unexplained | 15  | 28518799                     | 28792079  | 1   | 28605439                                            | 28705439  | 574             | 169             | 2               | 0               | 0               | 1               | 1   | 1.2                                 | 0.14                                   |
| Chr15:30Mb  | Unexplained | 15  | 29810970                     | 29899456  | 1   | 29805213                                            | 29905213  | 571             | 172             | 2               | 0               | 1               | 0               | 1   | 1.2                                 | 0.14                                   |
| Chr15:30Mb  | Unexplained | 15  | 30276167                     | 30405736  | 1   | 30290952                                            | 30390952  | 571             | 174             | 0               | 0               | 1               | 0               | 1   | 2.5                                 | 0.01                                   |
| Chr15:32Mb  | Unexplained | 15  | 31648952                     | 31664983  | 1   | 31606968                                            | 31706968  | 568             | 175             | 2               | 0               | 1               | 0               | 1   | 1.3                                 | 0.14                                   |
| Chr15:33Mb  | Unexplained | 15  | 32540912                     | 32587581  | 1   | 32514247                                            | 32614247  | 566             | 177             | 2               | 0               | 0               | 1               | 1   | 1.3                                 | 0.14                                   |
| Chr15:35Mb  | Unexplained | 15  | 34616006                     | 34623755  | 1   | 34569881                                            | 34669881  | 557             | 188             | 0               | 0               | 1               | 0               | 1   | 2.6                                 | 0                                      |
| Chr15:43Mb  | Unexplained | 15  | 42676951                     | 42870306  | 2   | 42727496                                            | 42827496  | 561             | 181             | 2               | 0               | 2               | 0               | 2   | 1.8                                 | 0.18                                   |
| Chr15:43Mb  | Unexplained | 15  | 43117488                     | 43293012  | 1   | 43155250                                            | 43255250  | 564             | 180             | 1               | 0               | 1               | 0               | 1   | 1.6                                 | 0.07                                   |
| Chr15:45Mb  | Unexplained | 15  | 44632328                     | 44731675  | 1   | 44632002                                            | 44732002  | 561             | 181             | 3               | 0               | 1               | 0               | 1   | 0.9                                 | 0.23                                   |
| Chr15:51Mb  | Unexplained | 15  | 50622305                     | 50651431  | 1   | 50586868                                            | 50686868  | 567             | 174             | 4               | 0               | 1               | 0               | 1   | 0.9                                 | 0.31                                   |
| Chr15:51Mb  | Unexplained | 15  | 51163737                     | 51194001  | 1   | 51128869                                            | 51228869  | 572             | 171             | 2               | 0               | 1               | 0               | 1   | 1.2                                 | 0.14                                   |
| Chr15:55Mb  | Unexplained | 15  | 54988481                     | 55048157  | 1   | 54968319                                            | 55068319  | 571             | 170             | 4               | 0               | 1               | 0               | 1   | 0.9                                 | 0.31                                   |
| Chr15:55Mb  | Unexplained | 15  | 55147797                     | 55250750  | 1   | 55149274                                            | 55249274  | 570             | 170             | 5               | 0               | 1               | 0               | 1   | 0.7                                 | 0.4                                    |
| Chr15:59Mb  | Unexplained | 15  | 59475461                     | 59485274  | 1   | 59430368                                            | 59530368  | 585             | 158             | 2               | 0               | 1               | 0               | 1   | 1.3                                 | 0.14                                   |
| Chr15:67Mb  | Unexplained | 15  | 66797683                     | 67021915  | 1   | 66859799                                            | 66959799  | 598             | 147             | 0               | 0               | 1               | 0               | 1   | 2.5                                 | 0.01                                   |
| Chr15:69Mb  | Unexplained | 15  | 69404788                     | 69423876  | 1   | 69364332                                            | 69464332  | 595             | 147             | 3               | 0               | 1               | 0               | 1   | 1.0                                 | 0.23                                   |
| Chr15:70Mb  | Unexplained | 15  | 69981316                     | 70230844  | 1   | 70056080                                            | 70156080  | 593             | 150             | 2               | 0               | 1               | 0               | 1   | 1.3                                 | 0.14                                   |
| Chr15:74Mb  | Unexplained | 15  | 74058189                     | 74404449  | 1   | 74181319                                            | 74281319  | 583             | 161             | 1               | 0               | 1               | 0               | 1   | 1.7                                 | 0.07                                   |
| Chr15:84Mb  | Unexplained | 15  | 83814880                     | 83941471  | 1   | 83828176                                            | 83928176  | 574             | 162             | 9               | 0               | 1               | 0               | 1   | 0.5                                 | 0.79                                   |
| Chr15:88Mb  | Unexplained | 15  | 88105435                     | 88144668  | 1   | 88075052                                            | 88175052  | 589             | 156             | 0               | 0               | 1               | 0               | 1   | 2.4                                 | 0                                      |

| Loci       | Type        | Chr | Cluster Position/information |          |     | Deepest 100kb window location and deletion patterns |          |                 |                 |                 |                 |                 |                 |     | HD Selection Pressure ( $\lambda$ ) | Small Deletion Rate ( $\bar{p}_s$ , %) |
|------------|-------------|-----|------------------------------|----------|-----|-----------------------------------------------------|----------|-----------------|-----------------|-----------------|-----------------|-----------------|-----------------|-----|-------------------------------------|----------------------------------------|
|            |             |     | 5'                           | 3'       | HDs | 5'                                                  | 3'       | n <sub>WW</sub> | n <sub>WL</sub> | n <sub>WS</sub> | n <sub>LL</sub> | n <sub>LS</sub> | n <sub>SS</sub> | HDs |                                     |                                        |
| Chr15:90Mb | Unexplained | 15  | 90306231                     | 90370961 | 1   | 90288596                                            | 90388596 | 592             | 151             | 2               | 0               | 1               | 0               | 1   | 1.3                                 | 0.14                                   |
| Chr15:90Mb | Unexplained | 15  | 90395182                     | 90409628 | 1   | 90352405                                            | 90452405 | 589             | 151             | 4               | 0               | 2               | 0               | 2   | 1.2                                 | 0.36                                   |
| Chr15:91Mb | Unexplained | 15  | 91132723                     | 91627577 | 1   | 91330150                                            | 91430150 | 587             | 155             | 3               | 0               | 1               | 0               | 1   | 1.0                                 | 0.23                                   |
| Chr15:93Mb | Unexplained | 15  | 92532137                     | 92557833 | 1   | 92494985                                            | 92594985 | 591             | 153             | 1               | 0               | 1               | 0               | 1   | 1.8                                 | 0.06                                   |
| Chr15:96Mb | Unexplained | 15  | 95657088                     | 95735864 | 1   | 95646476                                            | 95746476 | 594             | 149             | 2               | 0               | 1               | 0               | 1   | 1.3                                 | 0.14                                   |
| Chr16:0Mb  | Unexplained | 16  | 55072                        | 259591   | 1   | 107332                                              | 207332   | 585             | 156             | 4               | 0               | 1               | 0               | 1   | 0.8                                 | 0.31                                   |
| Chr16:4Mb  | Unexplained | 16  | 3589402                      | 3903159  | 3   | 3774720                                             | 3874720  | 589             | 152             | 2               | 0               | 3               | 0               | 3   | 2.5                                 | 0.22                                   |
| Chr16:5Mb  | Unexplained | 16  | 4500302                      | 4937324  | 2   | 4605445                                             | 4705445  | 596             | 145             | 3               | 0               | 2               | 0               | 2   | 1.5                                 | 0.26                                   |
| Chr16:6Mb  | Unexplained | 16  | 5548091                      | 5555787  | 1   | 5501939                                             | 5601939  | 593             | 145             | 6               | 0               | 2               | 0               | 2   | 0.9                                 | 0.54                                   |
| Chr16:6Mb  | Unexplained | 16  | 5598816                      | 5605457  | 1   | 5552137                                             | 5652137  | 588             | 145             | 10              | 0               | 3               | 0               | 3   | 0.8                                 | 0.94                                   |
| Chr16:6Mb  | Unexplained | 16  | 5607394                      | 7290455  | 31  | 6533569                                             | 6633569  | 573             | 143             | 17              | 1               | 7               | 5               | 13  | 1.8                                 | 1.72                                   |
| Chr16:8Mb  | Unexplained | 16  | 8016009                      | 8046067  | 1   | 7981038                                             | 8081038  | 598             | 144             | 3               | 0               | 1               | 0               | 1   | 1.1                                 | 0.22                                   |
| SOCS1      | RCG         | 16  | 11014208                     | 11349113 | 1   | 11131661                                            | 11231661 | 601             | 138             | 6               | 0               | 0               | 1               | 1   | 0.7                                 | 0.49                                   |
| Chr16:17Mb | Unexplained | 16  | 16535564                     | 16694677 | 1   | 16565121                                            | 16665121 | 616             | 128             | 1               | 0               | 1               | 0               | 1   | 1.8                                 | 0.06                                   |
| Chr16:24Mb | Unexplained | 16  | 24203684                     | 24223152 | 1   | 24163418                                            | 24263418 | 619             | 125             | 1               | 0               | 1               | 0               | 1   | 1.8                                 | 0.07                                   |
| Chr16:26Mb | Unexplained | 16  | 26357431                     | 26374914 | 1   | 26316173                                            | 26416173 | 620             | 122             | 3               | 0               | 1               | 0               | 1   | 1.1                                 | 0.22                                   |
| Chr16:28Mb | Unexplained | 16  | 28097074                     | 28556705 | 1   | 28276890                                            | 28376890 | 620             | 124             | 1               | 0               | 1               | 0               | 1   | 1.7                                 | 0.08                                   |
| Chr16:33Mb | Unexplained | 16  | 32151986                     | 33709485 | 1   | 32880736                                            | 32980736 | 613             | 132             | 0               | 1               | 0               | 0               | 1   | 2.6                                 | 0                                      |
| Chr16:49Mb | Unexplained | 16  | 48743065                     | 49321291 | 1   | 48982178                                            | 49082178 | 563             | 182             | 0               | 0               | 1               | 0               | 1   | 2.7                                 | 0.01                                   |
| CYLD       | RCG         | 16  | 49390234                     | 49506662 | 1   | 49398448                                            | 49498448 | 563             | 181             | 1               | 0               | 1               | 0               | 1   | 1.6                                 | 0.06                                   |
| Chr16:52Mb | Unexplained | 16  | 52205469                     | 52236205 | 1   | 52170837                                            | 52270837 | 562             | 182             | 1               | 0               | 1               | 0               | 1   | 1.6                                 | 0.07                                   |
| Chr16:53Mb | Unexplained | 16  | 52977133                     | 53056446 | 1   | 52966790                                            | 53066790 | 560             | 182             | 3               | 0               | 1               | 0               | 1   | 1.0                                 | 0.23                                   |
| Chr16:56Mb | Unexplained | 16  | 55552539                     | 55590514 | 1   | 55521527                                            | 55621527 | 560             | 184             | 1               | 0               | 1               | 0               | 1   | 1.6                                 | 0.06                                   |
| Chr16:66Mb | Unexplained | 16  | 65631822                     | 65738257 | 1   | 65635040                                            | 65735040 | 555             | 187             | 3               | 0               | 1               | 0               | 1   | 1.0                                 | 0.22                                   |
| CDH1       | RCG         | 16  | 67193480                     | 67411172 | 2   | 67258857                                            | 67358857 | 552             | 190             | 2               | 0               | 2               | 0               | 2   | 1.7                                 | 0.18                                   |
| Chr16:71Mb | Unexplained | 16  | 71204293                     | 71489962 | 1   | 71297128                                            | 71397128 | 540             | 200             | 5               | 0               | 1               | 0               | 1   | 0.6                                 | 0.41                                   |
| FRA16D     | FRA         | 16  | 76637861                     | 76695591 | 1   | 76616726                                            | 76716726 | 545             | 194             | 6               | 0               | 1               | 0               | 1   | 0.6                                 | 0.51                                   |
| FRA16D     | FRA         | 16  | 76741114                     | 76767164 | 1   | 76704139                                            | 76804139 | 543             | 195             | 7               | 0               | 1               | 0               | 1   | 0.5                                 | 0.6                                    |
| FRA16D     | FRA         | 16  | 76820541                     | 77766362 | 42  | 77139411                                            | 77239411 | 487             | 188             | 49              | 0               | 10              | 12              | 22  | 0.8                                 | 5.47                                   |
| FRA16D     | FRA         | 16  | 77818020                     | 77839048 | 3   | 77778534                                            | 77878534 | 534             | 196             | 13              | 0               | 3               | 0               | 3   | 0.6                                 | 1.26                                   |
| Chr16:79Mb | Unexplained | 16  | 79047065                     | 79060724 | 1   | 79003895                                            | 79103895 | 540             | 203             | 2               | 0               | 1               | 0               | 1   | 1.2                                 | 0.14                                   |
| Chr16:80Mb | Unexplained | 16  | 79953788                     | 79968731 | 1   | 79911260                                            | 80011260 | 536             | 203             | 6               | 0               | 1               | 0               | 1   | 0.6                                 | 0.51                                   |
| Chr16:84Mb | Unexplained | 16  | 83817258                     | 84006448 | 1   | 83861853                                            | 83961853 | 540             | 203             | 2               | 0               | 1               | 0               | 1   | 1.1                                 | 0.14                                   |
| Chr16:86Mb | Unexplained | 16  | 85843690                     | 85897888 | 1   | 85820789                                            | 85920789 | 534             | 207             | 4               | 0               | 1               | 0               | 1   | 0.8                                 | 0.31                                   |
| Chr16:87Mb | Unexplained | 16  | 87498277                     | 87498277 | 1   | 85820789                                            | 85920789 | 534             | 207             | 4               | 0               | 1               | 0               | 1   | 0.7                                 | 0.31                                   |
| Chr16:88Mb | Unexplained | 16  | 87919501                     | 88060474 | 2   | 87939988                                            | 88039988 | 525             | 213             | 6               | 0               | 1               | 1               | 2   | 0.7                                 | 0.55                                   |
| Chr17:0Mb  | Unexplained | 17  | 527                          | 295960   | 2   | 142558                                              | 242558   | 274             | 464             | 6               | 0               | 2               | 0               | 2   | 0.3                                 | 0.56                                   |
| Chr17:1Mb  | Unexplained | 17  | 916422                       | 1055526  | 1   | 935974                                              | 1035974  | 278             | 466             | 1               | 0               | 1               | 0               | 1   | 1.4                                 | 0.04                                   |
| Chr17:4Mb  | Unexplained | 17  | 3862248                      | 4153992  | 2   | 3958120                                             | 4058120  | 277             | 466             | 1               | 0               | 2               | 0               | 2   | 1.4                                 | 0.09                                   |
| Chr17:6Mb  | Unexplained | 17  | 5528899                      | 6196701  | 1   | 5812800                                             | 5912800  | 272             | 472             | 1               | 0               | 1               | 0               | 1   | 1.2                                 | 0.05                                   |
| TP53       | RCG         | 17  | 7426398                      | 7524779  | 5   | 7428048                                             | 7528048  | 260             | 472             | 9               | 0               | 5               | 0               | 5   | 0.4                                 | 1                                      |
| Chr17:8Mb  | Unexplained | 17  | 7937597                      | 7981116  | 1   | 7909357                                             | 8009357  | 268             | 475             | 2               | 0               | 1               | 0               | 1   | 0.7                                 | 0.11                                   |
| Chr17:10Mb | Unexplained | 17  | 9533358                      | 9888581  | 1   | 9660970                                             | 9760970  | 287             | 457             | 1               | 0               | 1               | 0               | 1   | 1.2                                 | 0.05                                   |
| MAP2K4     | RCG         | 17  | 10577855                     | 12429482 | 9   | 11888801                                            | 11988801 | 296             | 442             | 0               | 1               | 7               | 0               | 8   | 8.3                                 | 0.07                                   |

| Loci       | Type        | Chr | Cluster Position/information |          |     | Deepest 100kb window location and deletion patterns |          |                 |                 |                 |                 |                 |                 |     | HD Selection Pressure ( $\lambda$ ) | Small Deletion Rate ( $\bar{p}_s$ , %) |
|------------|-------------|-----|------------------------------|----------|-----|-----------------------------------------------------|----------|-----------------|-----------------|-----------------|-----------------|-----------------|-----------------|-----|-------------------------------------|----------------------------------------|
|            |             |     | 5'                           | 3'       | HDs | 5'                                                  | 3'       | n <sub>WW</sub> | n <sub>WL</sub> | n <sub>WS</sub> | n <sub>LL</sub> | n <sub>LS</sub> | n <sub>SS</sub> | HDs |                                     |                                        |
| Chr17:13Mb | Unexplained | 17  | 13026348                     | 13763498 | 2   | 13293323                                            | 13393323 | 306             | 438             | 0               | 0               | 2               | 0               | 2   | 3.0                                 | 0.03                                   |
| Chr17:16Mb | Unexplained | 17  | 15890796                     | 15926001 | 1   | 15858399                                            | 15958399 | 314             | 431             | 0               | 0               | 1               | 0               | 1   | 2.8                                 | 0                                      |
| Chr17:17Mb | Unexplained | 17  | 16937119                     | 16998334 | 1   | 16917727                                            | 17017727 | 322             | 421             | 2               | 0               | 1               | 0               | 1   | 0.8                                 | 0.12                                   |
| Chr17:19Mb | Unexplained | 17  | 19127616                     | 19175498 | 1   | 19101557                                            | 19201557 | 353             | 390             | 2               | 0               | 1               | 0               | 1   | 0.9                                 | 0.13                                   |
| Chr17:21Mb | Unexplained | 17  | 19572012                     | 22159777 | 9   | 20802956                                            | 20902956 | 376             | 364             | 1               | 2               | 3               | 0               | 5   | 3.7                                 | 0.09                                   |
| NF1        | RCG         | 17  | 26261142                     | 27104249 | 9   | 26506229                                            | 26606229 | 523             | 213             | 3               | 0               | 7               | 0               | 7   | 3.2                                 | 0.38                                   |
| Chr17:29Mb | Unexplained | 17  | 28262164                     | 29858053 | 1   | 29010109                                            | 29110109 | 529             | 214             | 2               | 1               | 0               | 0               | 1   | 1.6                                 | 0.06                                   |
| Chr17:31Mb | Unexplained | 17  | 30706624                     | 30781249 | 1   | 30693937                                            | 30793937 | 530             | 214             | 1               | 0               | 1               | 0               | 1   | 1.6                                 | 0.06                                   |
| Chr17:32Mb | Unexplained | 17  | 32213189                     | 32220785 | 1   | 32166987                                            | 32266987 | 539             | 205             | 1               | 0               | 1               | 0               | 1   | 1.7                                 | 0.05                                   |
| Chr17:35Mb | Unexplained | 17  | 34672843                     | 34758459 | 1   | 34665651                                            | 34765651 | 552             | 191             | 2               | 0               | 1               | 0               | 1   | 1.2                                 | 0.15                                   |
| Chr17:38Mb | Unexplained | 17  | 37502280                     | 37923756 | 1   | 37663018                                            | 37763018 | 539             | 204             | 2               | 0               | 1               | 0               | 1   | 1.2                                 | 0.13                                   |
| Chr17:50Mb | Unexplained | 17  | 50338365                     | 50369954 | 1   | 50304160                                            | 50404160 | 551             | 193             | 1               | 0               | 1               | 0               | 1   | 1.6                                 | 0.07                                   |
| Chr17:54Mb | Unexplained | 17  | 53821034                     | 53907698 | 1   | 53814366                                            | 53914366 | 544             | 200             | 1               | 0               | 1               | 0               | 1   | 1.5                                 | 0.07                                   |
| Chr17:60Mb | Unexplained | 17  | 59538188                     | 59563040 | 1   | 59500614                                            | 59600614 | 555             | 190             | 0               | 0               | 1               | 0               | 1   | 2.5                                 | 0.01                                   |
| Chr17:64Mb | Unexplained | 17  | 63611131                     | 64078475 | 1   | 63794803                                            | 63894803 | 558             | 186             | 1               | 0               | 1               | 0               | 1   | 1.7                                 | 0.07                                   |
| Chr17:68Mb | Unexplained | 17  | 67925728                     | 67956100 | 1   | 67890914                                            | 67990914 | 552             | 190             | 3               | 0               | 0               | 1               | 1   | 1.0                                 | 0.22                                   |
| Chr17:69Mb | Unexplained | 17  | 68503380                     | 68513309 | 1   | 68458345                                            | 68558345 | 556             | 189             | 0               | 0               | 1               | 0               | 1   | 2.5                                 | 0.01                                   |
| Chr17:74Mb | Unexplained | 17  | 74123871                     | 74134806 | 1   | 74079339                                            | 74179339 | 549             | 195             | 1               | 0               | 1               | 0               | 1   | 1.6                                 | 0.06                                   |
| Chr17:76Mb | Unexplained | 17  | 76056108                     | 76114222 | 1   | 76035165                                            | 76135165 | 542             | 198             | 5               | 0               | 1               | 0               | 1   | 0.7                                 | 0.4                                    |
| Chr17:78Mb | Unexplained | 17  | 78389072                     | 78418789 | 1   | 78353931                                            | 78453931 | 538             | 201             | 6               | 0               | 1               | 0               | 1   | 0.6                                 | 0.51                                   |
| Chr18:3Mb  | Unexplained | 18  | 2862368                      | 3123302  | 2   | 2923265                                             | 3023265  | 577             | 167             | 0               | 0               | 2               | 0               | 2   | 3.6                                 | 0.05                                   |
| Chr18:4Mb  | Unexplained | 18  | 4116939                      | 4266257  | 1   | 4141598                                             | 4241598  | 578             | 167             | 0               | 0               | 1               | 0               | 1   | 2.6                                 | 0                                      |
| Chr18:5Mb  | Unexplained | 18  | 4954931                      | 5182309  | 1   | 5018620                                             | 5118620  | 577             | 168             | 0               | 0               | 1               | 0               | 1   | 2.5                                 | 0                                      |
| Chr18:5Mb  | Unexplained | 18  | 5232888                      | 5644534  | 1   | 5388711                                             | 5488711  | 575             | 167             | 3               | 0               | 1               | 0               | 1   | 1.0                                 | 0.22                                   |
| Chr18:6Mb  | Unexplained | 18  | 5977484                      | 6552237  | 1   | 6214861                                             | 6314861  | 583             | 161             | 1               | 0               | 1               | 0               | 1   | 1.7                                 | 0.06                                   |
| Chr18:7Mb  | Unexplained | 18  | 6836738                      | 6869036  | 1   | 6802887                                             | 6902887  | 584             | 159             | 2               | 0               | 1               | 0               | 1   | 1.3                                 | 0.15                                   |
| Chr18:8Mb  | Unexplained | 18  | 7678124                      | 7678826  | 1   | 7628475                                             | 7728475  | 581             | 159             | 5               | 0               | 1               | 0               | 1   | 0.7                                 | 0.4                                    |
| Chr18:9Mb  | Unexplained | 18  | 8796192                      | 8807441  | 1   | 8751817                                             | 8851817  | 582             | 162             | 1               | 0               | 1               | 0               | 1   | 1.6                                 | 0.07                                   |
| Chr18:11Mb | Unexplained | 18  | 10556581                     | 10909330 | 1   | 10682956                                            | 10782956 | 580             | 162             | 3               | 0               | 1               | 0               | 1   | 1.0                                 | 0.23                                   |
| Chr18:15Mb | Unexplained | 18  | 14651644                     | 15392409 | 1   | 14972027                                            | 15072027 | 579             | 161             | 5               | 0               | 1               | 0               | 1   | 0.7                                 | 0.42                                   |
| Chr18:21Mb | Unexplained | 18  | 20818009                     | 20818009 | 1   | 14972027                                            | 15072027 | 579             | 161             | 5               | 0               | 1               | 0               | 1   | 0.7                                 | 0.41                                   |
| Chr18:22Mb | Unexplained | 18  | 21447753                     | 21828206 | 1   | 21587980                                            | 21687980 | 556             | 188             | 1               | 0               | 1               | 0               | 1   | 1.5                                 | 0.07                                   |
| Chr18:26Mb | Unexplained | 18  | 25824212                     | 25889816 | 1   | 25807014                                            | 25907014 | 534             | 209             | 2               | 0               | 1               | 0               | 1   | 1.2                                 | 0.14                                   |
| Chr18:26Mb | Unexplained | 18  | 26327258                     | 26489165 | 1   | 26358212                                            | 26458212 | 535             | 207             | 3               | 0               | 1               | 0               | 1   | 0.9                                 | 0.23                                   |
| Chr18:28Mb | Unexplained | 18  | 28055993                     | 28191074 | 1   | 28073534                                            | 28173534 | 536             | 209             | 0               | 0               | 1               | 0               | 1   | 2.5                                 | 0.01                                   |
| Chr18:29Mb | Unexplained | 18  | 28952098                     | 29006831 | 1   | 28929465                                            | 29029465 | 531             | 212             | 2               | 0               | 1               | 0               | 1   | 1.2                                 | 0.14                                   |
| Chr18:32Mb | Unexplained | 18  | 32159311                     | 32441234 | 1   | 32250273                                            | 32350273 | 525             | 218             | 2               | 0               | 1               | 0               | 1   | 1.1                                 | 0.13                                   |
| Chr18:38Mb | Unexplained | 18  | 38191191                     | 38191787 | 1   | 38141489                                            | 38241489 | 503             | 238             | 4               | 0               | 0               | 1               | 1   | 0.7                                 | 0.31                                   |
| Chr18:43Mb | Unexplained | 18  | 43073553                     | 43096481 | 1   | 43035017                                            | 43135017 | 505             | 239             | 1               | 0               | 1               | 0               | 1   | 1.5                                 | 0.07                                   |
| Chr18:44Mb | Unexplained | 18  | 43638400                     | 43661977 | 1   | 43600189                                            | 43700189 | 501             | 242             | 2               | 0               | 1               | 0               | 1   | 1.2                                 | 0.13                                   |
| Chr18:45Mb | Unexplained | 18  | 44502429                     | 44596440 | 1   | 44499435                                            | 44599435 | 499             | 242             | 4               | 0               | 1               | 0               | 1   | 0.7                                 | 0.31                                   |
| SMAD4      | RCG         | 18  | 46136754                     | 51150723 | 19  | 46763640                                            | 46863640 | 490             | 236             | 3               | 4               | 13              | 0               | 17  | 6.1                                 | 0.39                                   |
| Chr18:51Mb | Unexplained | 18  | 51177108                     | 51410144 | 2   | 51172550                                            | 51272550 | 487             | 256             | 1               | 0               | 2               | 0               | 2   | 2.2                                 | 0.1                                    |
| Chr18:54Mb | Unexplained | 18  | 54019824                     | 54039207 | 1   | 53979516                                            | 54079516 | 486             | 258             | 1               | 0               | 1               | 0               | 1   | 1.7                                 | 0.06                                   |

| Loci       | Type        | Chr | Cluster Position/information |          |     | Deepest 100kb window location and deletion patterns |          |                 |                 |                 |                 |                 |                 |     | HD Selection Pressure ( $\lambda$ ) | Small Deletion Rate ( $\bar{p}_s$ , %) |
|------------|-------------|-----|------------------------------|----------|-----|-----------------------------------------------------|----------|-----------------|-----------------|-----------------|-----------------|-----------------|-----------------|-----|-------------------------------------|----------------------------------------|
|            |             |     | 5'                           | 3'       | HDs | 5'                                                  | 3'       | n <sub>WW</sub> | n <sub>WL</sub> | n <sub>WS</sub> | n <sub>LL</sub> | n <sub>LS</sub> | n <sub>SS</sub> | HDs |                                     |                                        |
| Chr18:54Mb | Unexplained | 18  | 54330588                     | 54398580 | 1   | 54314584                                            | 54414584 | 487             | 258             | 0               | 0               | 1               | 0               | 1   | 2.6                                 | 0                                      |
| Chr18:55Mb | Unexplained | 18  | 55460039                     | 55507356 | 1   | 55433698                                            | 55533698 | 485             | 260             | 0               | 0               | 1               | 0               | 1   | 2.7                                 | 0.01                                   |
| Chr18:56Mb | Unexplained | 18  | 56068705                     | 56075399 | 1   | 56022052                                            | 56122052 | 483             | 260             | 2               | 0               | 1               | 0               | 1   | 1.0                                 | 0.14                                   |
| Chr18:56Mb | Unexplained | 18  | 56250406                     | 56272212 | 1   | 56211309                                            | 56311309 | 484             | 260             | 1               | 0               | 1               | 0               | 1   | 1.5                                 | 0.06                                   |
| Chr18:58Mb | Unexplained | 18  | 58406131                     | 58419060 | 1   | 58362596                                            | 58462596 | 477             | 267             | 1               | 0               | 1               | 0               | 1   | 1.5                                 | 0.06                                   |
| Chr18:59Mb | Unexplained | 18  | 58852176                     | 58930858 | 1   | 58841517                                            | 58941517 | 481             | 264             | 0               | 0               | 1               | 0               | 1   | 2.6                                 | 0                                      |
| Chr18:61Mb | Unexplained | 18  | 60306717                     | 60781941 | 1   | 60494329                                            | 60594329 | 478             | 265             | 2               | 0               | 1               | 0               | 1   | 1.0                                 | 0.13                                   |
| Chr18:61Mb | Unexplained | 18  | 61069109                     | 61365367 | 1   | 61167238                                            | 61267238 | 484             | 261             | 0               | 0               | 1               | 0               | 1   | 2.5                                 | 0                                      |
| Chr18:64Mb | Unexplained | 18  | 61621115                     | 65671217 | 1   | 63596166                                            | 63696166 | 479             | 265             | 1               | 1               | 0               | 0               | 1   | 2.3                                 | 0.01                                   |
| Chr18:66Mb | Unexplained | 18  | 66133549                     | 66223476 | 1   | 66128513                                            | 66228513 | 482             | 263             | 0               | 0               | 1               | 0               | 1   | 2.4                                 | 0                                      |
| Chr18:69Mb | Unexplained | 18  | 69277454                     | 69495207 | 2   | 69288425                                            | 69388425 | 483             | 261             | 0               | 0               | 2               | 0               | 2   | 3.6                                 | 0.04                                   |
| Chr18:74Mb | Unexplained | 18  | 73089104                     | 74986531 | 6   | 74348329                                            | 74448329 | 476             | 264             | 2               | 1               | 3               | 0               | 4   | 3.1                                 | 0.16                                   |
| Chr18:76Mb | Unexplained | 18  | 75719745                     | 75721005 | 1   | 75670375                                            | 75770375 | 469             | 270             | 6               | 0               | 0               | 1               | 1   | 0.5                                 | 0.51                                   |
| Chr18:76Mb | Unexplained | 18  | 76015391                     | 76116029 | 1   | 76015710                                            | 76115710 | 467             | 268             | 10              | 0               | 1               | 0               | 1   | 0.3                                 | 0.92                                   |
| Chr19:0Mb  | Unexplained | 19  | 41911                        | 388822   | 2   | 137614                                              | 237614   | 511             | 228             | 5               | 0               | 2               | 0               | 2   | 0.8                                 | 0.46                                   |
| STK11      | RCG         | 19  | 1054694                      | 1155594  | 1   | 1055144                                             | 1155144  | 509             | 234             | 2               | 0               | 1               | 0               | 1   | 1.1                                 | 0.14                                   |
| Chr19:3Mb  | Unexplained | 19  | 2432691                      | 2890730  | 1   | 2611711                                             | 2711711  | 512             | 233             | 0               | 0               | 1               | 0               | 1   | 2.6                                 | 0                                      |
| Chr19:5Mb  | Unexplained | 19  | 4955828                      | 5063262  | 1   | 4959545                                             | 5059545  | 521             | 223             | 1               | 0               | 1               | 0               | 1   | 1.7                                 | 0.06                                   |
| Chr19:6Mb  | Unexplained | 19  | 6383162                      | 6609863  | 1   | 6446513                                             | 6546513  | 535             | 208             | 2               | 0               | 1               | 0               | 1   | 1.2                                 | 0.14                                   |
| Chr19:8Mb  | Unexplained | 19  | 7687435                      | 7689574  | 1   | 7638505                                             | 7738505  | 547             | 197             | 1               | 0               | 1               | 0               | 1   | 1.7                                 | 0.07                                   |
| Chr19:11Mb | Unexplained | 19  | 10934734                     | 11092432 | 2   | 10950179                                            | 11050179 | 559             | 184             | 1               | 0               | 2               | 0               | 2   | 2.4                                 | 0.11                                   |
| Chr19:18Mb | Unexplained | 19  | 18188689                     | 18228816 | 1   | 18158753                                            | 18258753 | 568             | 176             | 1               | 0               | 1               | 0               | 1   | 1.5                                 | 0.08                                   |
| Chr19:19Mb | Unexplained | 19  | 18394642                     | 19673639 | 1   | 18984141                                            | 19084141 | 569             | 176             | 0               | 1               | 0               | 0               | 1   | 2.6                                 | 0                                      |
| Chr19:20Mb | Unexplained | 19  | 19679481                     | 19724631 | 1   | 19652056                                            | 19752056 | 567             | 177             | 0               | 1               | 1               | 0               | 2   | 6.5                                 | 0                                      |
| Chr19:22Mb | Unexplained | 19  | 20226212                     | 24388591 | 4   | 22985818                                            | 23085818 | 565             | 176             | 1               | 2               | 2               | 0               | 4   | 4.8                                 | 0.08                                   |
| Chr19:42Mb | Unexplained | 19  | 41537991                     | 41539339 | 2   | 41488665                                            | 41588665 | 617             | 123             | 4               | 0               | 2               | 0               | 2   | 1.3                                 | 0.35                                   |
| Chr19:42Mb | Unexplained | 19  | 41692004                     | 41692747 | 1   | 41642376                                            | 41742376 | 611             | 127             | 6               | 0               | 2               | 0               | 2   | 1.0                                 | 0.53                                   |
| Chr19:42Mb | Unexplained | 19  | 41729171                     | 42525588 | 2   | 42164985                                            | 42264985 | 609             | 131             | 4               | 0               | 2               | 0               | 2   | 1.2                                 | 0.36                                   |
| Chr19:46Mb | Unexplained | 19  | 46031710                     | 46058017 | 1   | 45994864                                            | 46094864 | 599             | 144             | 2               | 0               | 1               | 0               | 1   | 1.3                                 | 0.14                                   |
| Chr19:49Mb | Unexplained | 19  | 48986689                     | 49136518 | 1   | 49011604                                            | 49111604 | 588             | 155             | 2               | 0               | 1               | 0               | 1   | 1.2                                 | 0.14                                   |
| Chr19:56Mb | Unexplained | 19  | 56166337                     | 56183573 | 1   | 56124955                                            | 56224955 | 576             | 168             | 1               | 0               | 1               | 0               | 1   | 1.5                                 | 0.07                                   |
| Chr19:58Mb | Unexplained | 19  | 57953400                     | 57988283 | 1   | 57920842                                            | 58020842 | 582             | 161             | 2               | 0               | 1               | 0               | 1   | 1.2                                 | 0.15                                   |
| Chr19:58Mb | Unexplained | 19  | 58061536                     | 58115833 | 1   | 58038685                                            | 58138685 | 582             | 160             | 3               | 0               | 1               | 0               | 1   | 1.0                                 | 0.23                                   |
| Chr19:60Mb | Unexplained | 19  | 59971780                     | 60070512 | 1   | 59971146                                            | 60071146 | 590             | 154             | 1               | 0               | 1               | 0               | 1   | 1.7                                 | 0.07                                   |
| Chr19:62Mb | Unexplained | 19  | 61300454                     | 62610084 | 3   | 61525476                                            | 61625476 | 582             | 161             | 0               | 1               | 2               | 0               | 3   | 8.7                                 | 0.03                                   |
| Chr20:5Mb  | Unexplained | 20  | 4346587                      | 4669522  | 1   | 4458055                                             | 4558055  | 619             | 125             | 1               | 0               | 1               | 0               | 1   | 1.7                                 | 0.07                                   |
| Chr20:9Mb  | Unexplained | 20  | 9263242                      | 9358518  | 1   | 9260880                                             | 9360880  | 620             | 124             | 1               | 0               | 1               | 0               | 1   | 1.7                                 | 0.07                                   |
| Chr20:11Mb | Unexplained | 20  | 10283923                     | 11225755 | 3   | 10474090                                            | 10574090 | 619             | 124             | 0               | 0               | 3               | 0               | 3   | 5.3                                 | 0.08                                   |
| Chr20:15Mb | Unexplained | 20  | 14228432                     | 15468344 | 47  | 14971976                                            | 15071976 | 557             | 120             | 40              | 0               | 13              | 16              | 29  | 1.8                                 | 4.3                                    |
| Chr20:17Mb | Unexplained | 20  | 16610745                     | 16615772 | 1   | 16563259                                            | 16663259 | 619             | 125             | 1               | 0               | 1               | 0               | 1   | 1.8                                 | 0.06                                   |
| Chr20:18Mb | Unexplained | 20  | 17515817                     | 17762190 | 2   | 17579149                                            | 17679149 | 613             | 129             | 2               | 0               | 1               | 1               | 2   | 2.0                                 | 0.18                                   |
| Chr20:18Mb | Unexplained | 20  | 17799693                     | 17837380 | 1   | 17768537                                            | 17868537 | 613             | 129             | 3               | 0               | 1               | 0               | 1   | 1.0                                 | 0.22                                   |
| Chr20:19Mb | Unexplained | 20  | 18654481                     | 19934807 | 1   | 19244644                                            | 19344644 | 613             | 127             | 5               | 1               | 0               | 0               | 1   | 0.9                                 | 0.31                                   |
| Chr20:22Mb | Unexplained | 20  | 21588095                     | 21731368 | 1   | 21609732                                            | 21709732 | 607             | 135             | 3               | 0               | 1               | 0               | 1   | 1.0                                 | 0.23                                   |

| Loci           | Type        | Chr | Cluster Position/information |          |     | Deepest 100kb window location and deletion patterns |          |                 |                 |                 |                 |                 |                 |     | HD Selection Pressure ( $\lambda$ ) | Small Deletion Rate ( $\bar{p}_s$ , %) |
|----------------|-------------|-----|------------------------------|----------|-----|-----------------------------------------------------|----------|-----------------|-----------------|-----------------|-----------------|-----------------|-----------------|-----|-------------------------------------|----------------------------------------|
|                |             |     | 5'                           | 3'       | HDs | 5'                                                  | 3'       | n <sub>WW</sub> | n <sub>WL</sub> | n <sub>WS</sub> | n <sub>LL</sub> | n <sub>LS</sub> | n <sub>SS</sub> | HDs |                                     |                                        |
| Chr20:22Mb     | Unexplained | 20  | 21732876                     | 23212045 | 2   | 22156210                                            | 22256210 | 612             | 128             | 4               | 1               | 1               | 0               | 2   | 1.5                                 | 0.28                                   |
| Chr20:24Mb     | Unexplained | 20  | 24082855                     | 24587916 | 1   | 24285386                                            | 24385386 | 633             | 111             | 1               | 0               | 1               | 0               | 1   | 1.9                                 | 0.07                                   |
| Chr20:47Mb     | Unexplained | 20  | 46744264                     | 46833218 | 1   | 46738741                                            | 46838741 | 671             | 70              | 4               | 0               | 1               | 0               | 1   | 1.0                                 | 0.31                                   |
| Chr21:12Mb     | Unexplained | 21  | 9758743                      | 13439443 | 2   | 9837568                                             | 9937568  | 607             | 131             | 6               | 1               | 1               | 0               | 2   | 1.1                                 | 0.44                                   |
| Chr21:17Mb     | Unexplained | 21  | 13534481                     | 20901619 | 10  | 15326266                                            | 15426266 | 593             | 146             | 1               | 6               | 0               | 0               | 6   | 2.3                                 | 0.01                                   |
| Chr21:21Mb     | Unexplained | 21  | 21218768                     | 21252188 | 1   | 21185478                                            | 21285478 | 595             | 149             | 1               | 0               | 1               | 0               | 1   | 1.8                                 | 0.07                                   |
| Chr21:21Mb     | Unexplained | 21  | 21351501                     | 21382078 | 1   | 21316790                                            | 21416790 | 595             | 149             | 1               | 0               | 1               | 0               | 1   | 1.8                                 | 0.06                                   |
| Chr21:22Mb     | Unexplained | 21  | 21741662                     | 21855238 | 1   | 21748450                                            | 21848450 | 594             | 150             | 1               | 0               | 1               | 0               | 1   | 1.6                                 | 0.07                                   |
| Chr21:24Mb     | Unexplained | 21  | 23770556                     | 23807139 | 1   | 23738848                                            | 23838848 | 595             | 150             | 0               | 0               | 1               | 0               | 1   | 2.7                                 | 0                                      |
| Chr21:30Mb     | Unexplained | 21  | 30172492                     | 30178918 | 1   | 30125705                                            | 30225705 | 587             | 157             | 1               | 0               | 1               | 0               | 1   | 1.9                                 | 0.06                                   |
| Chr21:35Mb     | Unexplained | 21  | 35119811                     | 35142942 | 1   | 35081377                                            | 35181377 | 599             | 144             | 1               | 0               | 2               | 0               | 2   | 2.6                                 | 0.11                                   |
| Chr21:35Mb     | Unexplained | 21  | 35178179                     | 35437658 | 1   | 35257919                                            | 35357919 | 596             | 146             | 3               | 0               | 1               | 0               | 1   | 1.0                                 | 0.23                                   |
| Chr21:36Mb     | Unexplained | 21  | 35597164                     | 35602136 | 1   | 35549650                                            | 35649650 | 596             | 146             | 3               | 0               | 1               | 0               | 1   | 1.0                                 | 0.22                                   |
| Chr21:41Mb     | Unexplained | 21  | 40334512                     | 42637684 | 2   | 42080986                                            | 42180986 | 589             | 151             | 4               | 1               | 1               | 0               | 2   | 1.5                                 | 0.27                                   |
| Chr21:47Mb     | Unexplained | 21  | 46727421                     | 46921386 | 1   | 46774404                                            | 46874404 | 591             | 147             | 7               | 0               | 1               | 0               | 1   | 0.6                                 | 0.6                                    |
| Immune         | Immune      | 22  | 20475101                     | 21769756 | 6   | 20703452                                            | 20803452 | 517             | 216             | 8               | 1               | 3               | 1               | 5   | 1.2                                 | 0.73                                   |
| Chr22:22Mb     | Unexplained | 22  | 21893170                     | 21976953 | 1   | 21885062                                            | 21985062 | 520             | 223             | 2               | 0               | 1               | 0               | 1   | 1.1                                 | 0.14                                   |
| <i>SMARCB1</i> | RCG         | 22  | 22342573                     | 22951409 | 2   | 22414340                                            | 22514340 | 521             | 221             | 2               | 0               | 2               | 0               | 2   | 1.7                                 | 0.18                                   |
| Chr22:24Mb     | Unexplained | 22  | 23313017                     | 24065946 | 1   | 23639482                                            | 23739482 | 515             | 228             | 2               | 0               | 1               | 0               | 1   | 1.1                                 | 0.15                                   |
| Chr22:25Mb     | Unexplained | 22  | 24425042                     | 25011480 | 1   | 24668261                                            | 24768261 | 509             | 233             | 3               | 0               | 1               | 0               | 1   | 0.9                                 | 0.22                                   |
| Chr22:25Mb     | Unexplained | 22  | 25075802                     | 25175254 | 1   | 25075528                                            | 25175528 | 514             | 231             | 0               | 0               | 1               | 0               | 1   | 2.8                                 | 0                                      |
| <i>NF2</i>     | RCG         | 22  | 28285908                     | 28443960 | 4   | 28318885                                            | 28418885 | 505             | 233             | 4               | 0               | 4               | 0               | 4   | 1.6                                 | 0.42                                   |
| Chr22:31Mb     | Unexplained | 22  | 30450924                     | 30583211 | 2   | 30469052                                            | 30569052 | 500             | 241             | 3               | 0               | 2               | 0               | 2   | 1.2                                 | 0.27                                   |
| <i>FRA22B</i>  | FRA         | 22  | 32458982                     | 32498663 | 1   | 32428823                                            | 32528823 | 493             | 250             | 2               | 0               | 1               | 0               | 1   | 1.1                                 | 0.13                                   |
| Chr22:33Mb     | Unexplained | 22  | 32732344                     | 33426279 | 2   | 32977266                                            | 33077266 | 492             | 249             | 3               | 0               | 2               | 0               | 2   | 1.2                                 | 0.26                                   |
| Chr22:35Mb     | Unexplained | 22  | 34412363                     | 34766264 | 1   | 34539314                                            | 34639314 | 500             | 244             | 1               | 0               | 1               | 0               | 1   | 1.5                                 | 0.07                                   |
| Chr22:35Mb     | Unexplained | 22  | 35088480                     | 35188575 | 2   | 35088528                                            | 35188528 | 493             | 248             | 3               | 0               | 2               | 0               | 2   | 1.2                                 | 0.27                                   |
| Chr22:38Mb     | Unexplained | 22  | 37663447                     | 37743275 | 1   | 37653361                                            | 37753361 | 493             | 251             | 1               | 0               | 1               | 0               | 1   | 1.6                                 | 0.07                                   |
| Chr22:39Mb     | Unexplained | 22  | 38801708                     | 38882180 | 1   | 38791944                                            | 38891944 | 485             | 259             | 1               | 0               | 1               | 0               | 1   | 1.6                                 | 0.06                                   |
| <i>EP300</i>   | RCG         | 22  | 39870695                     | 39888991 | 1   | 39829843                                            | 39929843 | 479             | 261             | 5               | 0               | 1               | 0               | 1   | 0.6                                 | 0.42                                   |
| Chr22:41Mb     | Unexplained | 22  | 41285697                     | 41307135 | 1   | 41246416                                            | 41346416 | 486             | 257             | 2               | 0               | 1               | 0               | 1   | 1.1                                 | 0.14                                   |
| Chr22:45Mb     | Unexplained | 22  | 44850146                     | 45064227 | 1   | 44907187                                            | 45007187 | 486             | 258             | 1               | 0               | 1               | 0               | 1   | 1.5                                 | 0.06                                   |
| Chr22:45Mb     | Unexplained | 22  | 45191249                     | 45347372 | 1   | 45219311                                            | 45319311 | 484             | 258             | 3               | 0               | 1               | 0               | 1   | 0.9                                 | 0.22                                   |
| Chr22:49Mb     | Unexplained | 22  | 49058195                     | 49209172 | 3   | 49083684                                            | 49183684 | 479             | 261             | 3               | 0               | 3               | 0               | 3   | 1.4                                 | 0.3                                    |
| Chr22:50Mb     | Unexplained | 22  | 49446298                     | 49581322 | 1   | 49463810                                            | 49563810 | 477             | 263             | 5               | 0               | 1               | 0               | 1   | 0.6                                 | 0.42                                   |

Numbers of homozygous and hemizygous deletions for all deletion clusters together with the derived HD selection pressure ( $\lambda$ ) and small deletion rate scores ( $\bar{p}_s$ ) (see Methods).

The cluster position gives the start (5') and end (3') of each cluster together with the total number of homozygous deletions within the cluster. Positional information is also given for the 100kb window that contains the most homozygous deletions within each cluster, the number and patterns of deletions scored are based on this 100Kb window. Six possible deletion patterns can result from small and large scale deletions (Figure 3): WW – wild type copies of both parental chromosomes, WL – one wild type and one large scale deletion, WS - one wild type and one small scale deletion, LL – two overlapping large scale deletions, LS - one large scale and overlapping small scale deletion, SS – two overlapping small scale deletions. LS, SS and LL result in a homozygous deletion. Clusters or singleton homozygous deletions are classed as known recessive cancer gene (RCG), known fragile site (FRA), regions involved in immune diversity and hypermutation (Immune) and unexplained.

**Supplementary Table 8.** List of protein terminating variants associated with small hemizygous deletions

Known Cancer Genes:-

| Cell line    | Gene          | Nucleotide      | Amino Acid |
|--------------|---------------|-----------------|------------|
| ECC10        | <i>APC</i>    | 4666_4667insA   | T1556fs*3  |
| COLO-320-HSR | <i>BRCA2</i>  | 5946delT        | S1982fs*22 |
| AGS          | <i>CDH1</i>   | 1733_1734insC   | G579fs*9   |
| SNU-C2B      | <i>CDH1</i>   | 377delC         | P126fs*89  |
| BHY          | <i>CDKN2A</i> | 172C>T          | R58*       |
| HTC-C3       | <i>CDKN2A</i> | 197A>G          | H66R       |
| MHH-ES-1     | <i>CDKN2A</i> | Exon2-1 G-A     | splice     |
| KINGS-1      | <i>NF1</i>    | 7468delG        | V2490fs*12 |
| PF-382       | <i>PTEN</i>   | Exon5+2 insGCCG | splice     |
| 380          | <i>RB1</i>    | Exon23+1 G>A    | splice     |
| G-361        | <i>STK11</i>  | 842delC         | P281fs*6   |
| EW-16        | <i>TP53</i>   | 359delA         | K120fs*3   |
| H9           | <i>TP53</i>   | C586T           | R196*      |
| HH           | <i>TP53</i>   | Exon6-1G>A      | splice     |
| LP-1         | <i>TP53</i>   | G856A           | E286K      |

Unexplained deletion cluster:-

| Cell line       | Gene           | Nucleotide | Amino Acid |
|-----------------|----------------|------------|------------|
| LNCap-Clone-FGC | <i>MACROD2</i> | 991G>T     | W331*      |

Within the set of 746 cancer cell lines there were 59 small hemizygous deletions over the recessive cancer genes that form part of the set of 46 known cancer genes screened for intragenic point mutations. There were 15 putative oncogenic mutations in the same cell lines in the same recessive cancer genes. These would potentially inactivate the remaining allele as expected for a recessive cancer gene.

By contrast, there were 87 small hemizygous deletions over *NEGR1* and *MACROD2*, two genes located within “unexplained” homozygous deletion clusters and there was only one protein terminating variant present in the same sample as a small hemizygous deletion in the two genes screened. Thus genes within these unexplained homozygous deletion clusters are not behaving as recessive cancer genes.

These protein terminating mutations were either nonsense mutations, splice site mutations affecting positions -1, -2, +1, +2 or +5 (where the wild type nucleotide is a G) or out of frame small insertions/deletions.

**Supplementary Table 9.** Protein truncation mutations in *CTNNA1*, *CDKN2C*, *FHIT*, *WWOX*, *NEGR1* & *MACROD2*.

**CTNNA1:**

| Sample    | Class   | Type      | Tissue type   | Zygosity | Nucleotide    | AA        | MSI    |
|-----------|---------|-----------|---------------|----------|---------------|-----------|--------|
| HCC1187   | Somatic | Cell line | Breast        | Hom      | 2032C>T       | Q678*     | Stable |
| PD2187a   | Somatic | Primary   | Kidney        | Het      | 1633_1634insA | I545fs*20 | Stable |
|           |         |           |               |          |               |           |        |
| ME-180    | Unknown | Cell line | Cervix        | Hom      | 103C>T        | Q35*      | Stable |
| COR-L88   | Unknown | Cell line | Lung          | Hom      | 616C>T        | Q206*     | Stable |
| ChaGo-K-1 | Unknown | Cell line | Lung          | Hom      | 823G>T        | G275*     | Stable |
|           |         |           |               |          |               |           |        |
| HCT-15    | Unknown | Cell line | Colorectal    | Het      | 2301C>A       | C767*     | High   |
| A549      | Unknown | Cell line | Lung          | Het      | 2593G>T       | E865*     | Stable |
| CW-2      | Unknown | Cell line | Colorectal    | Het      | 1468C>T       | Q490*     | High   |
| Ca9-22    | Unknown | Cell line | Head and neck | Het      | 2593G>T       | E865*     | Stable |
| SW48      | Unknown | Cell line | Colorectal    | Het      | 2390_2391insA | A798fs*80 | High   |

**CDKN2C:**

| Sample    | Class   | Type      | Tissue type | Zygosity | Nucleotide | AA      | MSI    |
|-----------|---------|-----------|-------------|----------|------------|---------|--------|
| KMS-12-BM | Unknown | Cell line | Myeloma     | Hom      | 62_63delTT | L21fs*2 | Stable |

**WWOX:**

| Sample | Class   | Type      | Tissue type   | Zygosity | Nucleotide  | AA       | MSI |
|--------|---------|-----------|---------------|----------|-------------|----------|-----|
| NB16   | Unknown | Cell line | Neuroblastoma | Het      | Exon2+2 T>C | Splice   | Low |
| OC-314 | Unknown | Cell line | Ovary         | Het      | 855_856insA | D286fs*9 | Low |

**NEGR1:**

| Sample   | Class   | Type      | Tissue type | Zygosity | Nucleotide | AA    | MSI |
|----------|---------|-----------|-------------|----------|------------|-------|-----|
| NCI-H157 | Unknown | Cell line | Lung        | Het      | 575G>T     | G192* | Low |

**MACROD2:**

| Sample          | Class   | Type      | Tissue type     | Zygosity | Nucleotide   | AA     | MSI    |
|-----------------|---------|-----------|-----------------|----------|--------------|--------|--------|
| COLO-741        | Unknown | Cell line | Large intestine | Het      | Exon13+1 G>A | Splice | Stable |
| LNCap-Clone-FGC | Unknown | Cell line | Prostate        | Het      | 991G>T       | W331*  | High   |

*CTNNA1*, *WWOX*, *FHIT*, *NEGR1* and *MACROD2* were screened through the 746 cancer cell lines used in this study. *CTNNA1* was also screened through 354 primary cancers of multiple types. *CDKN2C* was screened through 786 cancer cell lines including the lines used in this study. All confirmed protein terminating variants identified are listed (none were identified in *FHIT*). The microsatellite instability (MSI) classification is also given.

**Supplementary Table 10.** Mapping position for recessive cancer genes and fragile sites.

Mapping positions for recessive cancer genes.

List of somatically mutated recessive cancer genes taken from the Cancer Gene Census (<http://www.sanger.ac.uk/genetics/CGP/>). Mapping positions given were obtained from Ensembl ([http://www.ensembl.org/Homo\\_sapiens/Info/Index](http://www.ensembl.org/Homo_sapiens/Info/Index), release 52 (Dec 2008)) based on the NCBI 36 assembly of the human genome [November 2005].

| Symbol        | Name                                                                                              | GeneID | Chr | Chr Band  | Position Start | Position Stop |
|---------------|---------------------------------------------------------------------------------------------------|--------|-----|-----------|----------------|---------------|
| HRPT2         | hyperparathyroidism 2                                                                             | 3279   | 1   | 1q21-q31  | 191,357,542    | 191,487,679   |
| MSH2          | mutS homolog 2 (E. coli)                                                                          | 4436   | 2   | 2p22-p21  | 47,483,734     | 47,563,871    |
| MSH6          | mutS homolog 6 (E. coli)                                                                          | 2956   | 2   | 2p16      | 47,863,725     | 47,887,588    |
| VHL           | von Hippel-Lindau syndrome gene                                                                   | 7428   | 3   | 3p25      | 10,158,319     | 10,168,744    |
| MLH1          | E.coli MutL homolog gene                                                                          | 4292   | 3   | 3p21.3    | 37,009,827     | 37,067,413    |
| PHOX2B        | paired-like homeobox 2b                                                                           | 8929   | 4   | 4p12      | 41,440,857     | 41,445,744    |
| FBXW7         | F-box and WD-40 domain protein 7 (archipelago homolog, Drosophila)                                | 55294  | 4   | 4q31.3    | 153,461,860    | 153,675,622   |
| PIK3R1        | phosphoinositide-3-kinase, regulatory subunit 1 (alpha)                                           | 5295   | 5   | 5q13.1    | 67,558,218     | 67,633,403    |
| APC           | adenomatous polyposis of the colon gene                                                           | 324    | 5   | 5q21      | 112,101,484    | 112,209,835   |
| IKZF1         | IKAROS family zinc finger 1                                                                       | 10320  | 7   | 7p12.2    | 50,314,924     | 50,440,293    |
| CDKN2A(p16)   | cyclin-dependent kinase inhibitor 2A (p16(INK4a)) gene                                            | 1029   | 9   | 9p21      | 21957751       | 21984490      |
| CDKN2A(ARF)   | cyclin-dependent kinase inhibitor 2A-- p14ARF protein                                             | 1029   | 9   | 9p21      | 21957751       | 21984490      |
| PTCH          | Homolog of Drosophila Patched gene                                                                | 5727   | 9   | 9q22.3    | 97,245,083     | 97,319,068    |
| COPEB         | core promoter element binding protein (KLF6)                                                      | 1316   | 10  | 10p15     | 3,811,260      | 3,817,455     |
| PTEN          | phosphatase and tensin homolog gene                                                               | 5728   | 10  | 10q23.3   | 89,612,850     | 89,721,667    |
| TNFRSF6       | tumor necrosis factor receptor superfamily, member 6 (FAS)                                        | 355    | 10  | 10q24.1   | 90,739,206     | 90,765,521    |
| SUFU          | suppressor of fused homolog (Drosophila)                                                          | 51684  | 10  | 10q24.32  | 104,253,734    | 104,383,282   |
| WT1           | Wilms tumour 1 gene                                                                               | 7490   | 11  | 11p13     | 32,365,897     | 32,413,752    |
| MEN1          | multiple endocrine neoplasia type 1 gene                                                          | 4221   | 11  | 11q13     | 64,327,564     | 64,335,342    |
| ATM           | ataxia telangiectasia mutated                                                                     | 472    | 11  | 11q22.3   | 107,598,769    | 107,745,036   |
| TCF1          | transcription factor 1, hepatic (HNF1)                                                            | 6927   | 12  | 12q24.2   | 109,188,150    | 109,309,027   |
| BRCA2         | familial breast/ovarian cancer gene 2                                                             | 675    | 13  | 13q12     | 31,787,617     | 31,871,809    |
| RB1           | retinoblastoma gene                                                                               | 5925   | 13  | 13q14     | 47,775,912     | 47,954,123    |
| SOCS1         | suppressor of cytokine signaling 1                                                                | 8651   | 16  | 16p13.13  | 11,255,775     | 11,257,540    |
| CYLD          | familial cylindromatosis gene                                                                     | 1540   | 16  | 16q12-q13 | 49,333,462     | 49,393,347    |
| CDH1          | cadherin 1, type 1, E-cadherin (epithelial) (ECAD)                                                | 999    | 16  | 16q22.1   | 67,328,696     | 67,426,943    |
| TP53          | tumor protein p53                                                                                 | 7157   | 17  | 17p13     | 7,512,445      | 7,531,642     |
| MAP2K4        | mitogen-activated protein kinase kinase 4                                                         | 6416   | 17  | 17p11.2   | 11,864,860     | 11,987,873    |
| NF1           | neurofibromatosis type 1 gene                                                                     | 4763   | 17  | 17q12     | 26,446,121     | 26,728,821    |
| BRCA1         | familial breast/ovarian cancer gene 1                                                             | 672    | 17  | 17q21     | 38,449,840     | 38,530,994    |
| PRKAR1A       | protein kinase, cAMP-dependent, regulatory, type I, alpha (tissue specific extinguisher 1)        | 5573   | 17  | 17q23-q24 | 64,019,705     | 64,040,503    |
| SMAD4 (MADH4) | Homolog of Drosophila Mothers Against Decapentaplegic 4 gene                                      | 4089   | 18  | 18q21.1   | 46,827,287     | 46,865,413    |
| STK11         | serine/threonine kinase 11 gene (LKB1)                                                            | 6794   | 19  | 19p13.3   | 1,156,798      | 1,179,785     |
| SMARCB1       | SWI/SNF related, matrix associated, actin dependent regulator of chromatin, subfamily b, member 1 | 6598   | 22  | 22q11     | 22,459,150     | 22,506,701    |
| NF2           | neurofibromatosis type 2 gene                                                                     | 4771   | 22  | 22q12.2   | 28,329,563     | 28,424,583    |
| EP300         | 300 kd E1A-Binding protein gene                                                                   | 2033   | 22  | 22q13     | 39,818,553     | 39,906,024    |
| WTX           | family with sequence similarity 123B (FAM123B)                                                    | 139285 | X   | Xq11.1    | 63,321,722     | 63,342,349    |

Mapping positions for known fragile sites.

In total 127 fragile sites were identified from either the NCBI (<http://www.ncbi.nlm.nih.gov/>) or the literature, 95 of these were classified as common fragile sites. All the fragile sites are mapped to cytogenetic bands the sequence coordinates of which were obtained using Ensembl ([http://www.ensembl.org/Homo\\_sapiens/Info/Index](http://www.ensembl.org/Homo_sapiens/Info/Index), release 52 (Dec 2008)) based on the NCBI 36 assembly of the human genome [November 2005].

Refined mapping positions were obtained from the literature for 39 of the common fragile sites. Positions of these sites were mapped onto the NCBI 36 assembly of the human genome using the mapping information (clones/genes) present in the relevant paper.

| Site  | Type   | Induced       | Source    | Cytogenetic mapping | Reference sequence position of band |             |             |      | Refined mapping position |           |           |           | Mapping | Gene  | Ref |
|-------|--------|---------------|-----------|---------------------|-------------------------------------|-------------|-------------|------|--------------------------|-----------|-----------|-----------|---------|-------|-----|
|       |        |               |           |                     | Chr                                 | Start       | End         | Size | Chr                      | Start     | End       | Size( Mb) |         |       |     |
| FRA1A | Common | Aphidicolin   | NCBI      | 1p36                | 1                                   | 1           | 27,800,000  | 27.8 |                          |           |           |           |         |       |     |
| FRA1B | Common | Aphidicolin   | NCBI      | 1p32                | 1                                   | 51,300,001  | 60,900,000  | 9.6  | 1                        | 57859401  | 58018691  | 0.16      | FISH    | DAB1  | 1   |
| FRA1C | Common | Aphidicolin   | NCBI      | 1p31.2              | 1                                   | 68,700,001  | 69,500,000  | 0.8  |                          |           |           |           |         |       |     |
| FRA1D | Common | Aphidicolin   | NCBI      | 1p22                | 1                                   | 84,700,001  | 94,500,000  | 9.8  |                          |           |           |           |         |       |     |
| FRA1M | Rare   | Folate        | NCBI      | 1p21.3              | 1                                   | 94,500,001  | 99,400,000  | 4.9  |                          |           |           |           |         |       |     |
| FRA1E | Common | Aphidicolin   | NCBI      | 1p21.2              | 1                                   | 99,400,001  | 102,000,000 | 2.6  | 1                        | 97522550  | 97892513  | 0.37      | FISH    | DPYD  | 2   |
| FRA1J | Common | 5-Azacytidine | NCBI      | 1q12                | 1                                   | 128,000,001 | 142,400,000 | 14.4 |                          |           |           |           |         |       |     |
| FRA1F | Common | Aphidicolin   | NCBI      | 1q21                | 1                                   | 142,400,001 | 153,300,000 | 10.9 |                          |           |           |           |         |       |     |
| FRA1G | Common | Aphidicolin   | NCBI      | 1q25.1              | 1                                   | 171,200,001 | 174,300,000 | 3.1  |                          |           |           |           |         |       |     |
| FRA1K | Common | Aphidicolin   | NCBI      | 1q31                | 1                                   | 184,000,001 | 197,500,000 | 13.5 | 1                        | 184035608 | 184239812 | 0.20      | FISH    |       | 3   |
| FRA1L | Common | Aphidicolin   | NCBI      | 1p31                | 1                                   | 184,000,001 | 197,500,000 | 13.5 |                          |           |           |           |         |       |     |
| FRA1H | Common | 5-Azacytidine | NCBI      | 1q42                | 1                                   | 222,100,001 | 234,600,000 | 12.5 | 1                        | 214173802 | 224638502 | 10.46     | FISH    |       | 4   |
| FRA1I | Common | Aphidicolin   | NCBI      | 1q44                | 1                                   | 241,700,001 | 247,249,719 | 5.5  |                          |           |           |           |         |       |     |
| FRA2C | Common | Aphidicolin   | NCBI      | 2p24.2              | 2                                   | 17,000,001  | 19,100,000  | 2.1  |                          |           |           |           |         |       |     |
| FRA2D | Common | Aphidicolin   | NCBI      | 2p16.2              | 2                                   | 52,700,001  | 54,800,000  | 2.1  |                          |           |           |           |         |       |     |
| FRA2E | Common | Aphidicolin   | NCBI      | 2p13                | 2                                   | 70,500,001  | 75,400,000  | 4.9  |                          |           |           |           |         |       |     |
| FRA2L | Rare   | Folate        | NCBI      | 2p11.2              | 2                                   | 83,700,001  | 91,000,000  | 7.3  |                          |           |           |           |         |       |     |
| FRA2A | Rare   | Folate        | NCBI      | 2q11.2              | 2                                   | 95,700,001  | 102,100,000 | 6.4  |                          |           |           |           |         |       |     |
| FRA2B | Rare   | Folate        | NCBI      | 2q13                | 2                                   | 108,600,001 | 113,800,000 | 5.2  |                          |           |           |           |         |       |     |
| FRA2F | Common | Aphidicolin   | NCBI      | 2q21.3              | 2                                   | 134,800,001 | 136,600,000 | 1.8  | 2                        | 140988941 | 141140259 | 0.15      | FISH    | LRP1B | 3   |
| FRA2K | Rare   | Folate        | NCBI      | 2q22.3              | 2                                   | 144,700,001 | 148,400,000 | 3.7  |                          |           |           |           |         |       |     |
| FRA2G | Common | Aphidicolin   | NCBI      | 2q31                | 2                                   | 169,500,001 | 182,700,000 | 13.2 | 2                        | 169205756 | 170181166 | 0.98      | FISH    |       | 5   |
| FRA2H | Common | Aphidicolin   | NCBI      | 2q32.1              | 2                                   | 182,700,001 | 189,100,000 | 6.4  |                          |           |           |           |         |       |     |
| FRA2I | Common | Aphidicolin   | NCBI      | 2q33                | 2                                   | 197,100,001 | 209,100,000 | 12.0 |                          |           |           |           |         |       |     |
| FRA2J | Common | Aphidicolin   | NCBI      | 2q37.3              | 2                                   | 237,000,001 | 242,951,149 | 6.0  |                          |           |           |           |         |       |     |
| FRA3A | Common | Aphidicolin   | NCBI      | 3p24.2              | 3                                   | 23,800,001  | 26,400,000  | 2.6  |                          |           |           |           |         |       |     |
| FRA3B | Common | Aphidicolin   | NCBI      | 3p14.2              | 3                                   | 58,500,001  | 63,700,000  | 5.2  | 3                        | 59392702  | 63462864  | 4.07      | FISH    | FHIT  | 6   |
| FRA3D | Common | Aphidicolin   | NCBI      | 3q25                | 3                                   | 150,400,001 | 161,200,000 | 10.8 |                          |           |           |           |         |       |     |
| FRA3C | Common | Aphidicolin   | NCBI      | 3q27                | 3                                   | 184,200,001 | 189,400,000 | 5.2  |                          |           |           |           |         |       |     |
| FRA4A | Common | Aphidicolin   | NCBI      | 4p16.1              | 4                                   | 5,200,001   | 10,900,000  | 5.7  |                          |           |           |           |         |       |     |
| FRA4D | Common | Aphidicolin   | NCBI      | 4p15                | 4                                   | 10,900,001  | 35,500,000  | 24.6 |                          |           |           |           |         |       |     |
| FRA4B | Common | BrdU          | NCBI      | 4q12                | 4                                   | 52,400,001  | 59,200,000  | 6.8  |                          |           |           |           |         |       |     |
| FRA4F | Common | Aphidicolin   | NCBI      | 4q22                | 4                                   | 88,200,001  | 99,100,000  | 10.9 | 4                        | 89512578  | 97530947  | 8.02      | FISH    | GRID2 | 7   |
| FRA4E | common | unclassified  | NCBI      | 4q27                | 4                                   | 120,600,001 | 124,000,000 | 3.4  |                          |           |           |           |         |       |     |
| FRA4C | Common | Aphidicolin   | NCBI      | 4q31.1              | 4                                   | 139,500,001 | 141,700,000 | 2.2  |                          |           |           |           |         |       |     |
| FRA5E | Common | Aphidicolin   | NCBI      | 5p14                | 5                                   | 18,500,001  | 29,300,000  | 10.8 | 5                        | 36698721  | 36800031  | 0.10      | FISH    |       | 3   |
| FRA5A | Common | BrdU          | NCBI      | 5p13                | 5                                   | 29,300,001  | 42,400,000  | 13.1 |                          |           |           |           |         |       |     |
| FRA5H | Common | Aphidicolin   | Literture | 5q11.2-12.1         | 5                                   | 50,500,001  | 63,000,000  | 12.5 | 5                        | 58582694  | 60221801  | 1.64      | FISH    | PDE4D | 8   |
| FRA5D | Common | Aphidicolin   | NCBI      | 5q15                | 5                                   | 91,900,001  | 97,300,000  | 5.4  | 5                        | 93746804  | 93916228  | 0.17      | FISH    |       | 3   |

| Site   | Type   | Induced       | Source    | Cytogenetic mapping | Reference sequence position of band |             |             |      | Refined mapping position |           |           |           | Mapping | Gene    | Ref |
|--------|--------|---------------|-----------|---------------------|-------------------------------------|-------------|-------------|------|--------------------------|-----------|-----------|-----------|---------|---------|-----|
|        |        |               |           |                     | Chr                                 | Start       | End         | Size | Chr                      | Start     | End       | Size( Mb) |         |         |     |
| FRA5B  | Common | BrdU          | NCBI      | 5q15                | 5                                   | 91,900,001  | 97,300,000  | 5.4  |                          |           |           |           |         |         |     |
| FRA5F  | Common | Aphidicolin   | NCBI      | 5q21                | 5                                   | 97,300,001  | 109,600,000 | 12.3 |                          |           |           |           |         |         |     |
| FRA5C  | Common | Aphidicolin   | NCBI      | 5q31.1              | 5                                   | 130,400,001 | 135,400,000 | 5.0  |                          |           |           |           |         |         |     |
| FRA5G  | Rare   | Folate        | NCBI      | 5q35                | 5                                   | 167,400,001 | 180,857,866 | 13.5 |                          |           |           |           |         |         |     |
| FRA6B  | Common | Aphidicolin   | NCBI      | 6p25.1              | 6                                   | 4,100,001   | 7,000,000   | 2.9  |                          |           |           |           |         |         |     |
| FRA6A  | Rare   | Folate        | NCBI      | 6p23                | 6                                   | 13,500,001  | 15,500,000  | 2.0  |                          |           |           |           |         |         |     |
| FRA6C  | Common | Aphidicolin   | NCBI      | 6p22.2              | 6                                   | 23,500,001  | 26,100,000  | 2.6  |                          |           |           |           |         |         |     |
| FRA6H  | Common | Aphidicolin   | Literture | 6p22.1-21.32        | 6                                   | 26,100,001  | 33,600,000  | 7.5  | 6                        | 27911017  | 37266641  | 9.36      | FISH    |         | 9   |
| FRA6D  | Common | BrdU          | NCBI      | 6q13                | 6                                   | 70,000,001  | 75,900,000  | 5.9  |                          |           |           |           |         |         |     |
| FRA6G  | Common | Aphidicolin   | NCBI      | 6q15                | 6                                   | 87,500,001  | 92,100,000  | 4.6  |                          |           |           |           |         |         |     |
| FRA6F  | Common | Aphidicolin   | NCBI      | 6q21                | 6                                   | 104,800,001 | 113,900,000 | 9.1  | 6                        | 111684663 | 112675612 | 0.99      | FISH    |         | 10  |
| FRA6E  | Common | Aphidicolin   | NCBI      | 6q26                | 6                                   | 160,900,001 | 164,400,000 | 3.5  | 6                        | 160310121 | 163537804 | 3.23      | FISH    | PARK2   | 11  |
| FRA7B  | Common | Aphidicolin   | NCBI      | 7p22                | 7                                   | 1           | 7,200,000   | 7.2  |                          |           |           |           |         |         |     |
| FRA7C  | Common | Aphidicolin   | NCBI      | 7p14.4              | 7                                   | 31,800,001  | 43,300,000  | 11.5 |                          |           |           |           |         |         |     |
| FRA7D  | Common | Aphidicolin   | NCBI      | 7p13                | 7                                   | 43,300,001  | 46,600,000  | 3.3  |                          |           |           |           |         |         |     |
| FRA7A  | Rare   | Folate        | NCBI      | 7p11.2              | 7                                   | 53,900,001  | 57,400,000  | 3.5  |                          |           |           |           |         |         |     |
| FRA7J  | Common | Aphidicolin   | NCBI      | 7q11                | 7                                   | 59,100,001  | 77,400,000  | 18.3 |                          |           |           |           |         |         |     |
| FRA7E  | Common | Aphidicolin   | NCBI      | 7q21.2              | 7                                   | 90,900,001  | 92,600,000  | 1.7  | 7                        | 79779087  | 84727000  | 4.95      | FISH    |         | 12  |
| FRA7F  | Common | Aphidicolin   | NCBI      | 7q22                | 7                                   | 97,900,001  | 107,200,000 | 9.3  |                          |           |           |           |         |         |     |
| FRA7K  | Common | Aphidicolin   | Literture | 7q31.1              | 7                                   | 107,200,001 | 114,400,000 | 7.2  | 7                        | 110246000 | 110439000 | 0.19      | FISH    | IMMP2L  | 13  |
| FRA7G  | Common | Aphidicolin   | NCBI      | 7q31.2              | 7                                   | 114,400,001 | 117,200,000 | 2.8  | 7                        | 111438641 | 116380617 | 4.94      | FISH    |         |     |
| FRA7H  | Common | Aphidicolin   | NCBI      | 7q32.3              | 7                                   | 130,100,001 | 132,400,000 | 2.3  | 7                        | 130156268 | 130320817 | 0.16      | FISH    |         | 14  |
| FRA7I  | Common | Aphidicolin   | NCBI      | 7q36                | 7                                   | 147,500,001 | 158,821,424 | 11.3 | 7                        | 143828403 | 145799234 | 1.97      | FISH    | CNTNAP2 | 15  |
| FRA8F  | rare   | unclassified  | NCBI      | 8q13                | 8                                   | 66,100,001  | 74,000,000  | 7.9  |                          |           |           |           |         |         |     |
| FRA8B  | Common | Aphidicolin   | NCBI      | 8q22.1              | 8                                   | 93,500,001  | 99,100,000  | 5.6  | 8                        | 87054356  | 87232189  | 0.18      | FISH    |         | 3   |
| FRA8A  | Rare   | Folate        | NCBI      | 8q22.3              | 8                                   | 101,600,001 | 106,100,000 | 4.5  |                          |           |           |           |         |         |     |
| FRA8C  | Common | Aphidicolin   | NCBI      | 8q24.1              | 8                                   | 117,700,001 | 127,300,000 | 9.6  | 8                        | 124353450 | 128318497 | 3.97      | FISH    |         | 3   |
| FRA8E  | Rare   | DistamycinA   | NCBI      | 8q24.1              | 8                                   | 117,700,001 | 127,300,000 | 9.6  |                          |           |           |           |         |         |     |
| FRA8D  | Common | Aphidicolin   | NCBI      | 8q24.3              | 8                                   | 140,000,001 | 146,274,826 | 6.3  |                          |           |           |           |         |         |     |
| FRA9G  | Common | Aphidicolin   | Literture | 9p22.2              | 9                                   | 16,600,001  | 18,500,000  | 1.9  | 9                        | 17138368  | 17487086  | 0.35      | FISH    |         | 16  |
| FRA9A  | Rare   | Folate        | NCBI      | 9p21                | 9                                   | 19,900,001  | 32,800,000  | 12.9 |                          |           |           |           |         |         |     |
| FRA9C  | Common | BrdU          | NCBI      | 9p21                | 9                                   | 19,900,001  | 32,800,000  | 12.9 |                          |           |           |           |         |         |     |
| FRA9F  | Common | 5-Azacytidine | NCBI      | 9q12                | 9                                   | 60,300,001  | 70,000,000  | 9.7  |                          |           |           |           |         |         |     |
| FRA9D  | Common | Aphidicolin   | NCBI      | 9q22.1              | 9                                   | 89,600,001  | 91,000,000  | 1.4  | 9                        | 96924625  | 97106197  | 0.18      | FISH    |         | 3   |
| FRA9E  | Common | Aphidicolin   | NCBI      | 9q32                | 9                                   | 113,900,001 | 116,700,000 | 2.8  | 9                        | 108383900 | 118069329 | 9.69      | FISH    |         | 17  |
| FRA9B  | Rare   | Folate        | NCBI      | 9q32                | 9                                   | 113,900,001 | 116,700,000 | 2.8  |                          |           |           |           |         |         |     |
| FRA10G | Common | Aphidicolin   | NCBI      | 10q11.2             | 10                                  | 42,100,001  | 53,300,000  | 11.2 |                          |           |           |           |         |         |     |
| FRA10C | Common | BrdU          | NCBI      | 10q21               | 10                                  | 53,300,001  | 71,300,000  | 18.0 |                          |           |           |           |         |         |     |
| FRA10D | Common | Aphidicolin   | NCBI      | 10q22.1             | 10                                  | 71,300,001  | 74,600,000  | 3.3  | 10                       | 67349725  | 69125933  | 1.78      | FISH    | CTNNA3  | 18  |
| FRA10A | Rare   | Folate        | NCBI      | 10q23.3             | 10                                  | 89,600,001  | 98,000,000  | 8.4  |                          |           |           |           |         |         |     |
| FRA10E | Common | Aphidicolin   | NCBI      | 10q25.2             | 10                                  | 111,800,001 | 114,900,000 | 3.1  | 10                       | 112987340 | 113136936 | 0.15      | FISH    |         | 12  |
| FRA10B | Rare   | BrdU          | NCBI      | 10q25.2             | 10                                  | 111,800,001 | 114,900,000 | 3.1  |                          |           |           |           |         |         |     |
| FRA10F | Common | Aphidicolin   | NCBI      | 10q26.1             | 10                                  | 119,100,001 | 127,400,000 | 8.3  |                          |           |           |           |         |         |     |
| FRA11C | Common | Aphidicolin   | NCBI      | 11p15.1             | 11                                  | 16,100,001  | 21,600,000  | 5.5  |                          |           |           |           |         |         |     |
| FRA11I | Rare   | DistamycinA   | NCBI      | 11p15.1             | 11                                  | 16,100,001  | 21,600,000  | 5.5  |                          |           |           |           |         |         |     |
| FRA11D | Common | Aphidicolin   | NCBI      | 11p14.2             | 11                                  | 26,000,001  | 27,200,000  | 1.2  |                          |           |           |           |         |         |     |
| FRA11E | Common | Aphidicolin   | NCBI      | 11p13               | 11                                  | 31,000,001  | 36,400,000  | 5.4  | 11                       | 31912313  | 33995492  | 2.08      | FISH    |         | 19  |
| FRA11H | Common | Aphidicolin   | NCBI      | 11q13               | 11                                  | 63,100,001  | 76,700,000  | 13.6 |                          |           |           |           |         |         |     |
| FRA11A | Rare   | Folate        | NCBI      | 11q13.3             | 11                                  | 69,200,001  | 70,700,000  | 1.5  |                          |           |           |           |         |         |     |
| FRA11F | Common | Aphidicolin   | NCBI      | 11q14.2             | 11                                  | 85,300,001  | 87,900,000  | 2.6  | 11                       | 82842703  | 85017614  | 2.17      | FISH    | DLG2    | 18  |
| FRA11G | Common | Aphidicolin   | NCBI      | 11q23.3             | 11                                  | 115,400,001 | 120,700,000 | 5.3  | 11                       | 113109646 | 117672914 | 4.56      | FISH    |         | 20  |

| Site   | Type   | Induced           | Source    | Cytogenetic mapping | Reference sequence position of band |             |             |      | Refined mapping position |          |          |           | Mapping | Gene         | Ref |
|--------|--------|-------------------|-----------|---------------------|-------------------------------------|-------------|-------------|------|--------------------------|----------|----------|-----------|---------|--------------|-----|
|        |        |                   |           |                     | Chr                                 | Start       | End         | Size | Chr                      | Start    | End      | Size( Mb) |         |              |     |
| FRA11B | Rare   | Folate            | NCBI      | 11q23.3             | 11                                  | 115,400,001 | 120,700,000 | 5.3  |                          |          |          |           |         |              |     |
| FRA12A | Rare   | Folate            | NCBI      | 12q13.1             | 12                                  | 44,600,001  | 53,100,000  | 8.5  |                          |          |          |           |         |              |     |
| FRA12B | Common | Aphidicolin       | NCBI      | 12q21.3             | 12                                  | 78,700,001  | 91,200,000  | 12.5 |                          |          |          |           |         |              |     |
| FRA12E | Common | Aphidicolin       | NCBI      | 12q24               | 12                                  | 107,500,001 | 132,349,534 | 24.8 |                          |          |          |           |         |              |     |
| FRA12D | Rare   | Folate            | NCBI      | 12q24.13            | 12                                  | 110,800,001 | 112,800,000 | 2.0  |                          |          |          |           |         |              |     |
| FRA12C | Rare   | BrdU              | NCBI      | 12q24.2             | 12                                  | 112,800,001 | 119,100,000 | 6.3  |                          |          |          |           |         |              |     |
| FRA13A | Common | Aphidicolin       | NCBI      | 13q13.2             | 13                                  | 32,900,001  | 34,700,000  | 1.8  | 13                       | 34454088 | 35070897 | 0.62      | FISH    | NBEA         | 21  |
| FRA13B | Common | BrdU              | NCBI      | 13q21               | 13                                  | 52,200,001  | 72,100,000  | 19.9 |                          |          |          |           |         |              |     |
| FRA13C | Common | Aphidicolin       | NCBI      | 13q21.2             | 13                                  | 57,600,001  | 60,500,000  | 2.9  |                          |          |          |           |         |              |     |
| FRA13E | Common | Aphidicolin       | Literture | 13q22.1/22.2        | 13                                  | 72,100,001  | 76,000,000  | 3.9  | 13                       | 72182675 | 75285499 | 3.10      | FISH    |              | 9   |
| FRA13D | Common | Aphidicolin       | NCBI      | 13q32               | 13                                  | 93,800,001  | 100,500,000 | 6.7  |                          |          |          |           |         |              |     |
| FRA14B | Common | Aphidicolin       | NCBI      | 14q23               | 14                                  | 55,800,001  | 67,000,000  | 11.2 |                          |          |          |           |         |              |     |
| FRA14C | Common | Aphidicolin       | NCBI      | 14q24.1             | 14                                  | 67,000,001  | 69,300,000  | 2.3  | 14                       | 68246478 | 68430607 | 0.18      | FISH    |              | 3   |
| FRA15A | Common | Aphidicolin       | NCBI      | 15q22               | 15                                  | 55,800,001  | 65,300,000  | 9.5  | 15                       | 58867639 | 59059459 | 0.19      | FISH    | RORA         | 22  |
| FRA16A | Rare   | Folate            | NCBI      | 16p13.11            | 16                                  | 14,700,001  | 16,700,000  | 2.0  |                          |          |          |           |         |              |     |
| FRA16E | Rare   | DistamycinA       | NCBI      | 16p12.1             | 16                                  | 21,700,001  | 27,600,000  | 5.9  |                          |          |          |           |         |              |     |
| FRA16C | Common | Aphidicolin       | NCBI      | 16q22.1             | 16                                  | 65,200,001  | 69,400,000  | 4.2  | 16                       | 63917503 | 63934965 | 0.02      | FISH    |              | 12  |
| FRA16B | Rare   | Distamycin-A/BrdU | NCBI      | 16q22.1             | 16                                  | 65,200,001  | 69,400,000  | 4.2  |                          |          |          |           |         |              |     |
| FRA16D | Common | Aphidicolin       | NCBI      | 16q23.2             | 16                                  | 78,200,001  | 80,500,000  | 2.3  | 16                       | 76161268 | 77917106 | 1.76      | FISH    | WVOX         | 23  |
| FRA17A | Rare   | Distamycin-A/BrdU | NCBI      | 17p12               | 17                                  | 11,200,001  | 15,900,000  | 4.7  |                          |          |          |           |         |              |     |
| FRA17B | Common | Aphidicolin       | NCBI      | 17q23.1             | 17                                  | 54,900,001  | 55,600,000  | 0.7  |                          |          |          |           |         |              |     |
| FRA18A | Common | Aphidicolin       | NCBI      | 18q12.2             | 18                                  | 31,000,001  | 35,500,000  | 4.5  |                          |          |          |           |         |              |     |
| FRA18B | Common | Aphidicolin       | NCBI      | 18q21.3             | 18                                  | 52,000,001  | 59,800,000  | 7.8  |                          |          |          |           |         |              |     |
| FRA18C | Rare   | Folate            | NCBI      | 18q22.1             | 18                                  | 59,800,001  | 64,900,000  | 5.1  |                          |          |          |           |         |              |     |
| FRA18C | Common | Aphidicolin       | Literture | 18q22.2             | 18                                  | 64,900,001  | 66,900,000  | 2.0  | 18                       | 65406041 | 65587255 | 0.18      | FISH    |              | 24  |
| FRA19A | Common | 5-Azacytidine     | NCBI      | 19q13               | 19                                  | 37,100,001  | 63,811,651  | 26.7 |                          |          |          |           |         |              |     |
| FRA19B | Rare   | Folate            | NCBI      | 19p13               | 19                                  | 37,100,001  | 63,811,651  | 26.7 |                          |          |          |           |         |              |     |
| FRA20B | Common | Aphidicolin       | NCBI      | 20p12.2             | 20                                  | 9,000,001   | 11,900,000  | 2.9  |                          |          |          |           |         |              |     |
| FRA20A | Rare   | Folate            | NCBI      | 20p11.23            | 20                                  | 17,800,001  | 21,200,000  | 3.4  |                          |          |          |           |         |              |     |
| FRA22B | Common | Aphidicolin       | NCBI      | 22q12.2             | 22                                  | 27,900,001  | 30,500,000  | 2.6  | 22                       | 31998847 | 32648829 | 0.65      | FISH    | Large        | 18  |
| FRA22A | Rare   | Folate            | NCBI      | 22q13               | 22                                  | 35,900,001  | 49,691,432  | 13.8 |                          |          |          |           |         |              |     |
| FRAXB  | Common | Aphidicolin       | NCBI      | Xp22.31             | X                                   | 6,000,001   | 9,500,000   | 3.5  | X                        | 6978144  | 7558235  | 0.58      | FISH    |              | 25  |
| FRAXC  | Common | Aphidicolin       | NCBI      | Xq22.1              | X                                   | 98,200,001  | 102,500,000 | 4.3  | X                        | 29721307 | 32743792 | 3.02      | FISH    | IL1RAPL1/DMD | 26  |
| FRAXD  | Common | Aphidicolin       | NCBI      | Xq27.2              | X                                   | 140,100,001 | 141,900,000 | 1.8  |                          |          |          |           |         |              |     |
| FRAXA  | Rare   | Folate            | NCBI      | Xq27.3              | X                                   | 141,900,001 | 146,900,000 | 5.0  |                          |          |          |           |         |              |     |
| FRAXE  | Rare   | Folate            | NCBI      | Xq28                | X                                   | 146,900,001 | 154,913,754 | 8.0  |                          |          |          |           |         |              |     |
| FRAXF  | Rare   | Folate            | NCBI      | Xq28                | X                                   | 146,900,001 | 154,913,754 | 8.0  |                          |          |          |           |         |              |     |

1. McAvoy, S., Zhu, Y., Perez, D. S., James, C. D. & Smith, D. I. Disabled-1 is a large common fragile site gene, inactivated in multiple cancers. *Genes Chromosomes Cancer* 47, 165-174 (2008).
2. Hormozian, F., Schmitt, J. G., Sagulenko, E., Schwab, M. & Savelyeva, L. *FRA1E* common fragile site breaks map within a 370 kilobase pair region and disrupt the dihydropyrimidine dehydrogenase gene (*DPYD*). *Cancer Lett.* 246, 82-91 (2007).
3. Ferber, M. J. et al. Preferential integration of human papillomavirus type 18 near the *c-myc* locus in cervical carcinoma. *Oncogene* 22, 7233-7242 (2003).
4. Curatolo, A., Limongi, Z. M., Pelliccia, F. & Rocchi, A. Molecular characterization of the human common fragile site FRA1H. *Genes Chromosomes Cancer* 46, 487-493 (2007).

5. Limongi, M. Z., Pelliccia, F. & Rocchi, A. Characterization of the human common fragile site FRA2G. *Genomics* 81, 93-97 (2003).
6. Becker, N. A., Thorland, E. C., Denison, S. R., Phillips, L. A. & Smith, D. I. Evidence that instability within the FRA3B region extends four megabases. *Oncogene* 21, 8713-8722 (2002).
7. Rozier, L., El-Achkar, E., Apiou, F. & Debatisse, M. Characterization of a conserved aphidicolin-sensitive common fragile site at human 4q22 and mouse 6C1: possible association with an inherited disease and cancer. *Oncogene* 23, 6872-6880 (2004).
8. Hormozian, F., Savelyeva, L. & Schwab, M. FRA5H: A New Common Fragile Site on Chromosome 5q11.2-12. *10th European Workshop of Molecular Cytogenetics in Human Solid Tumours* (2006).
9. Fechter, A., Buettel, I., Kuehnel, E., Schwab, M. & Savelyeva, L. Cloning of genetically tagged chromosome break sequences reveals new fragile sites at 6p21 and 13q22. *Int. J. Cancer* 120, 2359-2367 (2007).
10. Morelli, C. et al. Cloning and characterization of the common fragile site *FRA6F* harboring a replicative senescence gene and frequently deleted in human tumors. *Oncogene* 21, 7266-7276 (2003).
11. Denison, S. R., Callahan, G., Becker, N. A., Phillips, L. A. & Smith, D. I. Characterization of FRA6E and its potential role in autosomal recessive juvenile parkinsonism and ovarian cancer. *Genes Chromosomes Cancer* 38, 40-52 (2003).
12. Zlotorynski, E. et al. Molecular Basis for Expression of Common and Rare Fragile Sites. *Mol. Cell Biol.* 23, 7143-7151 (2003).
13. Helmrich, A. et al. Identification of the human/mouse syntenic common fragile site FRA7K/Fra12C1 - Relation of FRA7K and other human common fragile sites on chromosome 7 to evolutionary breakpoints. *Int. J. Cancer* 120, 48-54 (2007).
14. Mishmar, D. et al. Molecular characterization of a common fragile site ( *FRA7H* ) on human chromosome 7 by the cloning of a simian virus 40 integration site. *Proc. Natl. Acad. Sci. USA* 95, 8141-8146 (1998).
15. Ciullo, M. et al. Initiation of the breakage-fusion-bridge mechanism through common fragile site activation in human breast cancer cells: the model of *PIP* gene duplication from a break at *FRA7I*. *Hum. Mol. Genet.* 11, 2887-2894 (2002).
16. Sawinska M et al. Novel aphidicolin-inducible common fragile site *FRA9G* maps to 9p22.2, within the *C9orf39* gene. *Genes Chromosomes Cancer* 46, 991-999 (2007).
17. Callahan, G., Denison, S. R., Phillips, L. A., Shridhar, V. & Smith, D. I. Characterization of the common fragile site *FRA9E* and its potential role in ovarian cancer. *Oncogene* 22, 590-601 (2003).
18. Smith, D. I., Zhu, Y., McAvoy, S. & Kuhn, R. Common fragile sites, extremely large genes, neural development and cancer. *Cancer Lett.* 232, 48-57 (2006).
19. Bester, A. C. et al. Fragile sites are preferential targets for integrations of MLV vectors in gene therapy. *Gene Therapy* 13, 1057-1059 (2006).
20. Fechter, A., Buettel, I., Kuehnel, E., Savelyeva, L. & Schwab, M. Common fragile site *FRA11G* and rare fragile site *FRA11B* at 11q23.3 encompass distinct genomic regions. *Genes Chromosomes Cancer* 46, 98-106 (2007).
21. Savelyeva, L., Sagulenko, E., Schmitt, J. G. & Schwab, M. The neurobeachin gene spans the common fragile site *FRA13A*. *Hum. Genet.* 118, 551-558 (2006).
22. Zhu, Y., McAvoy, S., Kuhn, R. & Smith, D. I. RORA, a large common fragile site gene, is involved in cellular stress response. *Oncogene* 25, 2901-2908 (2006).
23. Krummel, K. A., Roberts, L. R., Kawakami, M., Glover, T. W. & Smith, D. I. The Characterization of the Common Fragile Site FRA16D and Its Involvement in Multiple Myeloma Translocations. *Genomics* 69, 37-46 (2000).
24. Debacker, K. et al. FRA18C: a new aphidicolin-inducible fragile site on chromosome 18q22, possibly associated with in vivo chromosome breakage. *J. Med. Genet.* 44, 347-352 (2007).
25. Arlt, M. F., Miller, D. E., Beer, D. G. & Glover, T. W. Molecular characterization of FRAXB and comparative common fragile site instability in cancer cells. *Genes Chromosomes Cancer* 33, 82-92 (2002).
26. McAvoy, S., Ganapathiraju, S., Perez, D. S., James, C. D. & Smith, D. I. *DMD* and *IL1RAPL1*: two large adjacent genes localized within a common fragile site (FRAXC) have reduced expression in cultured brain tumors. *Cytogenet. Genome Res.* 119, 196-203 (2007).

**Supplementary Table 11.** Primers and control amplimers used in multiplex PCR screen of RCGs.

| Gene                   | Sense Primer              | Antisense primer           | Size | PCR | Control |
|------------------------|---------------------------|----------------------------|------|-----|---------|
| <i>CDKN2A(p14)</i> _E1 | cctcgtgctgatgctactga      | ccgcctccagaaaacttaga       | 481  | TD  | Actin3  |
| <i>CDKN2A</i> _E1      | accggaggaagaaagaggag      | agaatcgaagcgctaccta        | 356  | TD  | Com2    |
| <i>CDKN2A</i> _E2      | cttctggacacgctggt         | agtcttcattgctccgcagt       | 403  | TD  | Com2    |
| <i>CDKN2A</i> _E3      | tccatgcgatgaaattgttg      | tgccacacatcttgacctc        | 599  | TD  | Com2    |
| <i>PTEN</i> _E1        | ctctggctgctgaggagaag      | ccgcagaaatggatacaggt       | 313  | HS  | Com6    |
| <i>PTEN</i> _E2        | ctccagctatagtggggaaaa     | ccattaggtacggtaagccaaa     | 359  | HS  | Actin10 |
| <i>PTEN</i> _E3        | tggattcaaagcataaaaaccat   | acctccatggaagatgctatta     | 375  | HS  | Actin10 |
| <i>PTEN</i> _E4        | tgtgaaagacattatgacacc     | tctgcttctccctgtgattg       | 363  | HS  | Actin10 |
| <i>PTEN</i> _E5        | cctgaataaaatgggggaaaa     | ttcgtcccttccagcttta        | 378  | HS  | Actin10 |
| <i>PTEN</i> _E6        | atgttcagtgccggaacttg      | gctgaactcctctggtggac       | 370  | HS  | Actin10 |
| <i>PTEN</i> _E7        | ctccaaltcaggaccacac       | tgttccatgctaatttctc        | 377  | HS  | Actin10 |
| <i>PTEN</i> _E8        | tttgagtgaagaaaaatcatgtgaa | cttgtcattatctgcacgctct     | 364  | HS  | Actin10 |
| <i>PTEN</i> _E9        | ctgacaccactgactctgatcc    | taaaacgggaaagtgccatc       | 361  | HS  | Actin10 |
| <i>RB1</i> _E1         | gggttttctcaggggacgtt      | gtcaagtggaagccgagacc       | 486  | HS  | Com10   |
| <i>RB1</i> _E2         | ccatgcaagcaaatattttca     | ccaatactccatccacagatga     | 365  | HS  | Actin8  |
| <i>RB1</i> _E3         | aaggaactgtggggaatctg      | caaactctgtctttctgttca      | 396  | HS  | Actin8  |
| <i>RB1</i> _E4         | ggaattggatgaatggatgtg     | ttctcaacagctttgacatagca    | 399  | HS  | Actin8  |
| <i>RB1</i> _E5         | ttttcttttcaggacatgtgaa    | tgctgtaacagaccctcaa        | 363  | HS  | Actin8  |
| <i>RB1</i> _E6         | cattggtgctaaaagtcttctgg   | cgattatccctgggtggatt       | 400  | HS  | Actin8  |
| <i>RB1</i> _E7         | accatgctgatagtgtgttg      | cagccttagaaccatgtttgg      | 319  | HS  | Actin8  |
| <i>RB1</i> _E8         | tgcacggatagcaaaacaac      | cagccttggcagggtattt        | 398  | HS  | Actin8  |
| <i>RB1</i> _E9         | tgcacctgtgaatagccact      | cctccctccacagtctcaaa       | 341  | HS  | Actin8  |
| <i>RB1</i> _E10        | ttgaaaatcttctaacgatacga   | gccattatctttgtgtcacat      | 380  | HS  | Actin8  |
| <i>RB1</i> _E11        | cataatggaaagagaccacaa     | tctgaaacactataaagccatgaa   | 354  | HS  | Actin8  |
| <i>RB1</i> _E12        | tcagcaagtgtatcaaccttca    | cctcaaaaagttcatcccaa       | 384  | HS  | Actin8  |
| <i>RB1</i> _E13        | ggacagggtgtgtcgaaat       | ggcatgtatagtccattcaca      | 387  | HS  | Actin8  |
| <i>RB1</i> _E14        | tggagttcgctgtattaccg      | gggtgaaatggcacaatctt       | 324  | HS  | Actin8  |
| <i>RB1</i> _E15        | ggcagatcaggagggtcaagg     | aaatttacctaaaatttgaatgga   | 359  | HS  | Com10   |
| <i>RB1</i> _E16        | gcaaactctgaatgacaacattt   | tcttgaatactcctttggcactc    | 395  | HS  | Actin8  |
| <i>RB1</i> _E17        | tcaaaattggaaggctatttcc    | gggattccatgattcgatgt       | 359  | HS  | Actin8  |
| <i>RB1</i> _E18        | tcacctgaatctgctgtcc       | tgccattctgactcttgga        | 386  | HS  | Actin8  |
| <i>RB1</i> _E19        | cccagaagccattgaaatct      | ccctctcgttccatgtct         | 396  | HS  | Actin8  |
| <i>RB1</i> _E20        | atcatctggaccctttcca       | acaagggtgtgtgtgtacacg      | 372  | HS  | Com1    |
| <i>RB1</i> _E21        | tggcatatgcaaagtgaagaa     | caaatactgcttattacagggataaa | 351  | HS  | Actin8  |
| <i>RB1</i> _E22        | ggcttcatgcagagactgaaa     | ggatcaaaaataatcccctctc     | 365  | HS  | Actin8  |
| <i>RB1</i> _E23        | ctccaccagggttaggtcaa      | ggatcaaaaataatcccctctc     | 325  | HS  | Actin8  |
| <i>RB1</i> _E24        | tgtcatctctgcaaaattgtat    | gtgagcaaaaacagctcacg       | 392  | HS  | Actin8  |
| <i>RB1</i> _E25        | tgggtgttaattggggatg       | atgaccatctcggtactgg        | 392  | HS  | Actin8  |
| <i>RB1</i> _E26        | caaattgcataccaacattcag    | gctgaaatttgactctcctg       | 370  | HS  | Actin8  |
| <i>RB1</i> _E26        | gtgcagatgcaattgtttgg      | tgaatgggcagtcaatcaaa       | 349  | HS  | Actin8  |
| <i>MAP2K4</i> _E1      | acctcttccgcacaaatg        | gcgttcttaccctgcat          | 435  | TD  | Actin3  |
| <i>MAP2K4</i> _E2      | gaaattcctcattgccttca      | tggaaactccagaaggaaaagaa    | 404  | HS  | Actin10 |
| <i>MAP2K4</i> _E3      | tggaaaaattgcttccaat       | catgccaaaaatgcaatcaa       | 440  | HS  | Actin10 |
| <i>MAP2K4</i> _E4      | ttgttgataactccaaca        | tcagctaaaaccagttattcc      | 420  | HS  | Actin10 |
| <i>MAP2K4</i> _E5      | gagtggggaaaattggcttt      | gtgcattcaaaactccagca       | 407  | HS  | Actin3  |
| <i>MAP2K4</i> _E6      | acttgtataaactgtgtgctg     | tcgatgccttatttgtatgcag     | 438  | HS  | Actin4  |
| <i>MAP2K4</i> _E7      | tgttgtgaaatgacttttgctg    | caggctctctgtgcaatgac       | 420  | HS  | Actin10 |
| <i>MAP2K4</i> _E8      | ttgtctccctctccctca        | gctactgtggcaagggtgaa       | 397  | HS  | Actin8  |
| <i>MAP2K4</i> _E9      | ccctccagtgaggagtagt       | tcatggctgttttaccacaa       | 444  | HS  | Actin8  |
| <i>MAP2K4</i> _E10     | tgccataatttagtcaatttcaa   | agagagttccggggttagga       | 366  | HS  | Actin8  |
| <i>MAP2K4</i> _E11     | cccatgccattagcatatc       | catgatggaacgaacacca        | 437  | HS  | Actin10 |
| <i>MAP2K4</i> _UTR     | actgctcttgtagcttttg       | gcaggctcaggacaacaaca       | 414  | HS  | Actin8  |
| <i>SMAD4</i> _E1       | tcttccgaagtgaactcct       | gaccaggccggtgtgtt          | 499  | HS  | Com6    |
| <i>SMAD4</i> _E2       | failed                    |                            |      |     |         |
| <i>SMAD4</i> _E3       | gcaatttcattctttccaag      | tgccaccatagagggtatagaaa    | 499  | HS  | Actin3  |
| <i>SMAD4</i> _E4       | ctgagcacaggccttgaaat      | taaagtgcgggctatcttc        | 492  | HS  | Actin3  |
| <i>SMAD4</i> _E5       | aacataaagggaaggatctcaa    | ctgccgctcacacaaactaa       | 527  | HS  | Actin3  |
| <i>SMAD4</i> _E6       | tttctgggaatagaagcttataaaa | ccaagtgtgtgtcatacctgt      | 431  | HS  | Actin3  |

|                  |                           |                        |     |    |        |
|------------------|---------------------------|------------------------|-----|----|--------|
| <i>SMAD4</i> E7  | ccagagagagaggtggatgg      | gctggctgaccagtaaatcc   | 464 | HS | Actin3 |
| <i>SMAD4</i> E8  | agcactaccacctggactgg      | gcaaacaacaaatgaatggaa  | 387 | HS | Actin8 |
| <i>SMAD4</i> E9  | tcttagacattgcataagctgtttt | ttcttttctttggggacagtt  | 399 | HS | Actin8 |
| <i>SMAD4</i> E10 | ttgggtgcattacattcca       | catgggaaaacataaccttgaa | 395 | HS | Actin8 |
| <i>SMAD4</i> E11 | tgaaggtgatgtttgggtca      | aaatgtaacaaattggcaacga | 333 | HS | Actin8 |
| <i>SMAD4</i> E12 | aaataagtcaggcattgggtttt   | aaaagaatgcaaacagggtca  | 412 | HS | Actin8 |
| <i>SMAD4</i> E13 | ctaggcacaaggttggtgc       | ttgatggcaaagggcttaga   | 398 | HS | Actin8 |
| <i>STK11</i> E1  | ggaagtcggaacacaaggaa      | ccccagcaagccatacttac   | 388 | HS | Actin8 |
| <i>STK11</i> E2  | gctgatacccccctgtcctc      | gggttagcctgggaggagact  | 379 | HS | Actin8 |
| <i>STK11</i> E3  | cgtaggctcctcctcctcg       | aactgggccttcattgtcaa   | 402 | HS | Actin8 |
| <i>STK11</i> E4  | failed                    |                        |     |    |        |
| <i>STK11</i> E5  | ggcttcaaggtggacatctg      | cctgtggactcaaggacacc   | 421 | HS | Actin8 |
| <i>STK11</i> E6  | gaggacactccccctctacc      | acacccccaaccctacattt   | 390 | HS | Actin8 |
| <i>STK11</i> E7  | ttgtctgtgctcacttcta       | ctcaaccagctgccacat     | 442 | HS | Actin3 |
| <i>STK11</i> E8  | gtcaggcttgagtcaggctc      | gacatcctggccgagtca     | 436 | HS | Actin3 |
| <i>STK11</i> E9  | caggtgcaacagacgtggt       | ccagcctcactgtgctt      | 449 | HS | Actin8 |
| <i>STK11</i> E10 | acgcggtgttgacttc          | tcacagccacagctcaaadc   | 320 | HS | Com10  |
| Actin3           | cctgcagagttccaaaggag      | ggcatcctcaccctgaagta   | 320 | -  | N/A    |
| Actin4           | ggacatgcagaaagtgcata      | aagatgacccaggtgagtgg   | 389 | -  | N/A    |
| Actin8           | gtcaggcagctcgtagctct      | aacactggctcgtgtgacaa   | 579 | -  | N/A    |
| Actin10          | aaagccatgccaatctcatc      | gaagctaagtcctgcctca    | 553 | -  | N/A    |
| Com1             | catgcaaattgtggtcctg       | gggccaacatgagtgactt    | 680 | -  | N/A    |
| Com2             | aggctgctaaaatgccagaa      | caggggaagctgaagtaagg   | 644 | -  | N/A    |
| Com6             | gggatttctccctgaaaagc      | tggggattcagattctttgc   | 696 | -  | N/A    |
| Com10            | cctggccagaactccaata       | ttgccgggatctgtatttc    | 619 |    | N/A    |

The gene column includes the gene and exon screened, sense and antisense primers gives the primer sequence used for both the genes and control amplimers, the size of the PCR product is given in base pairs together with the PCR condition and the control primer used in the multiplex PCR.

PCR Conditions: HS -Initial denaturation 95°C for 15 minutes, followed by 29 cycles of 95 °C for 30 seconds, 60°C for 30 seconds and 72°C for 30 seconds with a final extension at 72°C for 10 minutes. TD - Initial denaturation 95°C for 15 minutes, followed by a cycle of denaturation at 94°C for 1 minute, annealing at 72°C for 1 minute and extension at 72°C for 1 minute. This is repeated reducing the annealing temperature by 2°C each cycle until a temperature of 62°C is reached. The following 39 cycles comprise 94°C for 30 seconds, 60°C for 30 seconds and 72°C for 30 seconds, with a final extension for 10 minutes at 72°C.
